# Supplementary material
Source: MDPI journal article supplement (https://www.mdpi.com/2311-5637/7/2/97)
Supplement: s1 [file s1]

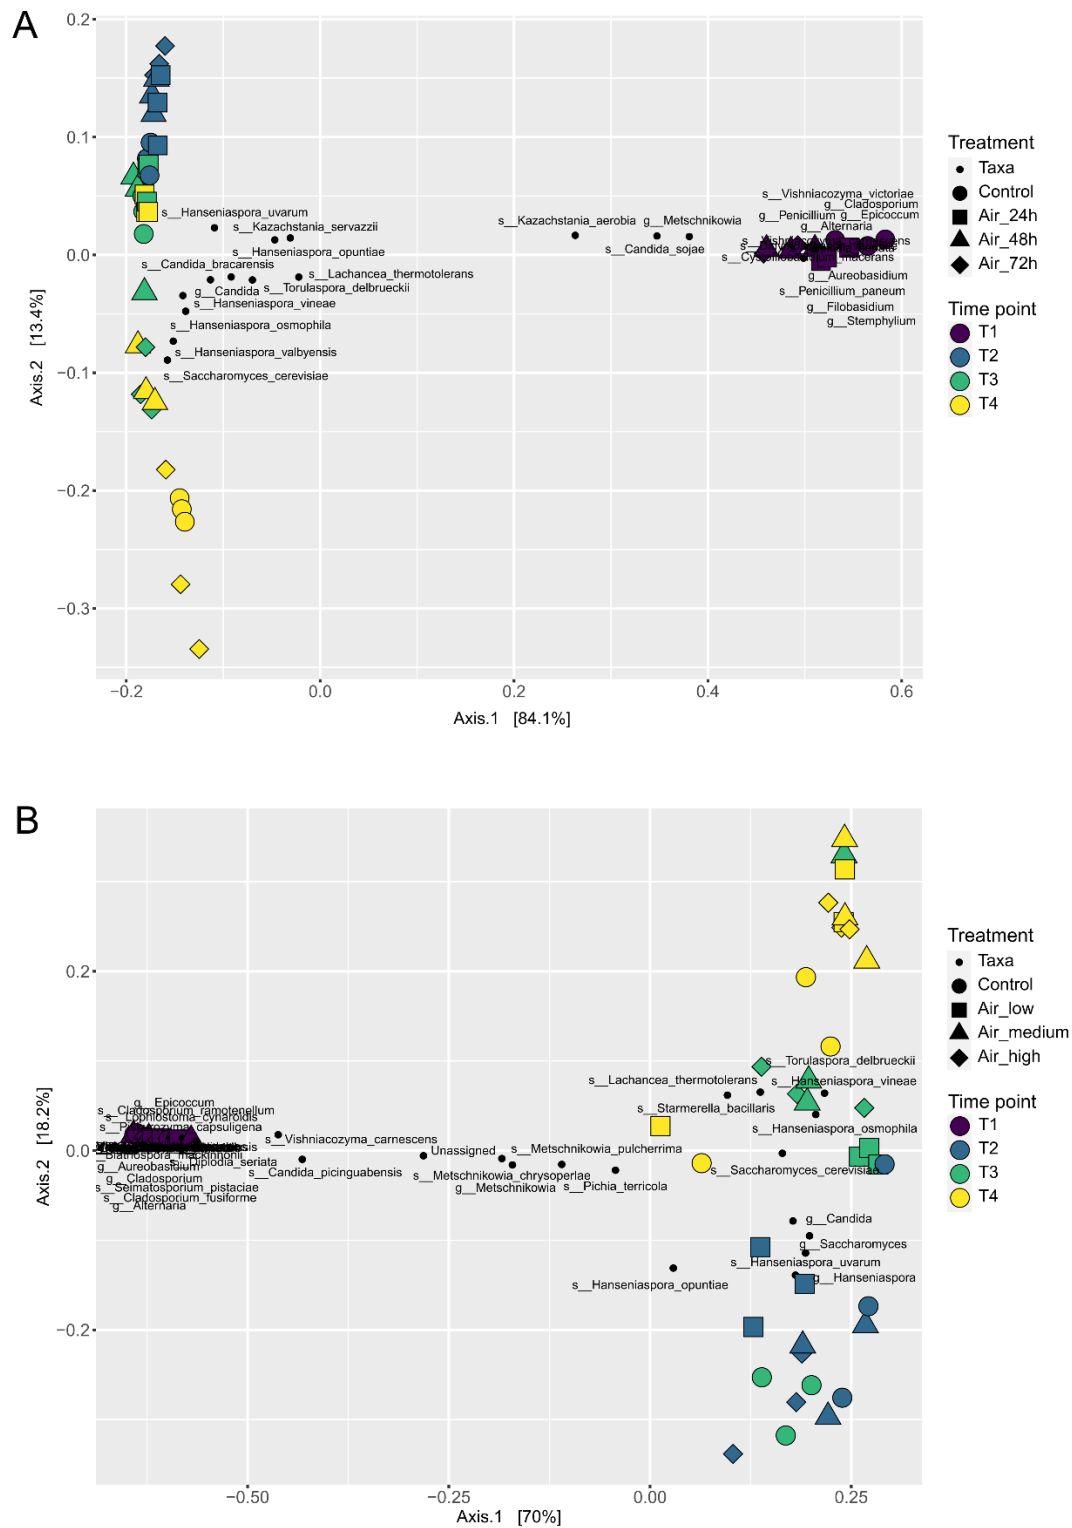

**Figure S1.** Principal Coordinates Analysis (PCoA) for ferments from the 2019 (A) and 2020 (B) vintages. Ferment samples were taken at four time points in both vintages. For 2019 wines: T1, 0%; T2, 20%; T3, 50%; and T4, 80%; of sugar consumption. For 2020 wines: T1, 0%; T2, 20%; T3, 55%; and T4, 85%; of sugar consumption.
