# Supplementary material
Source: MDPI journal article supplement (https://www.mdpi.com/2311-5637/7/2/97)
Supplement: s1 [file s1 › Supplementary tables.xlsx]

## Sheet: Table S1
Table S1. Estimated total oxygen exposure.
	Total oxygen exposure
	[mg/L x h]
Vintage 2019
Air_24h	7.0 ± 2.5
Air_48h	4.0 ± 2.6
Air_72h	5.8 ± 3.0
Vintage 2020
Air_low	2.4 ± 1.7
Air_medium	5.3 ± 2.3
Air_high	12.3 ± 4.1

## Sheet: Table S2
Table S2. Percentage of consumed sugar at each sampling point.
	Vintage 2019
Time point	Control	Air_24	Air_48	Air_72
T1	0 ± 0	0 ± 0	0 ± 0	0 ± 0
T2	20 ± 2	20 ± 1	19 ± 6	16 ± 6
T3	50 ± 1	50 ± 2	54 ± 4	53 ± 6
T4	75 ± 2	75 ± 2	82 ± 2	85 ± 10
	Vintage 2020
Time point	Control	Air_low	Air_medium	Air_high
T1	0 ± 0	0 ± 0	0 ± 0	0 ± 0
T2	23 ± 4	15 ± 2	19 ± 2	18 ± 4
T3	51 ± 9	56 ± 1	62 ± 4	58 ± 3
T4	83 ± 8	85 ± 2	87 ± 4	82 ± 4

## Sheet: Table S3
Table S3. Abundance for fungal OTUs in 2019 wines
							Treatment	01_Control	01_Control	01_Control	01_Control	01_Control	01_Control	01_Control	01_Control	01_Control	01_Control	01_Control	01_Control	02_Ox24	02_Ox24	02_Ox24	02_Ox24	02_Ox24	02_Ox24	02_Ox24	02_Ox24	02_Ox24	02_Ox24	02_Ox24	02_Ox24	03_Ox48	03_Ox48	03_Ox48	03_Ox48	03_Ox48	03_Ox48	03_Ox48	03_Ox48	03_Ox48	03_Ox48	03_Ox48	03_Ox48	04_Ox72	04_Ox72	04_Ox72	04_Ox72	04_Ox72	04_Ox72
							Time_point	T1	T2	T3	T4	T1	T2	T3	T4	T1	T2	T3	T4	T1	T2	T3	T4	T1	T2	T3	T4	T1	T2	T3	T4	T1	T2	T3	T4	T1	T2	T3	T4	T1	T2	T3	T4	T1	T2	T3	T4	T1	T2
otu_id	kingdom	phylum	class	order	family	genus	species	Labscale_1_T1	Labscale_1_T2	Labscale_1_T3	Labscale_1_T4	Labscale_2_T1	Labscale_2_T2	Labscale_2_T3	Labscale_2_T4	Labscale_3_T1	Labscale_3_T2	Labscale_3_T3	Labscale_3_T4	Labscale_13_T1	Labscale_13_T2	Labscale_13_T3	Labscale_13_T4	Labscale_14_T1	Labscale_14_T2	Labscale_14_T3	Labscale_14_T4	Labscale_15_T1	Labscale_15_T2	Labscale_15_T3	Labscale_15_T4	Labscale_16_T1	Labscale_16_T2	Labscale_16_T3	Labscale_16_T4	Labscale_17_T1	Labscale_17_T2	Labscale_17_T3	Labscale_17_T4	Labscale_18_T1	Labscale_18_T2	Labscale_18_T3	Labscale_18_T4	Labscale_19_T1	Labscale_19_T2	Labscale_19_T3	Labscale_19_T4	Labscale_20_T1	Labscale_20_T2
b68c4947e6d984d5967dd840436284bb_rep;size=3078173;	k__Fungi	p__Ascomycota	c__Saccharomycetes	o__Saccharomycetales	f__Saccharomycetaceae	g__Saccharomyces	s__Saccharomyces_cerevisiae	249	8286	17841	21336	174	6205	13411	19283	166	5262	9419	23718	320	2882	7759	9997	318	1738	6279	12233	299	1523	9398	11909	176	1973	8326	26469	266	1743	6011	15392	224	2420	8871	16785	348	1811	10415	29294	270	2529
534cc0cb4fa906277fbade8054488844_rep;size=1206171;	k__Fungi	p__Ascomycota	c__Saccharomycetes	o__Saccharomycetales	f__Saccharomycodaceae	g__Hanseniaspora	s__Hanseniaspora_uvarum	3758	22504	36997	11740	3153	20871	29895	11495	3258	15649	17481	13603	5348	15030	25163	28526	5012	13212	23634	32749	4702	13946	30194	31250	3385	13494	15021	29274	5493	15485	17100	20656	4946	18012	27176	19081	6807	13058	12563	22335	4835	15650
06d0e5c2032b533d816f08b2cefe8ccd_rep;size=1072344;	k__Fungi	p__Ascomycota	c__Dothideomycetes	o__Dothideales	f__Aureobasidiaceae	g__Aureobasidium	g__Aureobasidium	13394	229	216	74	13403	184	178	113	14793	87	111	110	13007	95	175	164	15260	72	129	184	16933	114	201	171	8332	128	29	106	15424	83	27	8	12186	62	36	36	17750	76	81	81	14167	39
032c2be54b6b77baefab51382609dba9_rep;size=1045291;	k__Fungi	p__Ascomycota	c__Saccharomycetes	o__Saccharomycetales	f__Saccharomycodaceae	g__Hanseniaspora	s__Hanseniaspora_uvarum	3086	19504	33259	10352	2628	18783	27583	10428	2623	13812	16290	12402	4009	13596	21547	24799	3925	12200	21130	30463	3793	13549	27376	28378	2800	12382	14706	27570	4355	14387	16137	19268	4096	16666	25697	18591	5402	11751	11519	21257	4119	13894
939dcbbff7367b33f5be59d806037678_rep;size=307916;	k__Fungi	p__Ascomycota	c__Dothideomycetes	o__Capnodiales	f__Cladosporiaceae	g__Cladosporium	g__Cladosporium	3996	32	28	4	3973	23	21	7	5241	14	10	4	5492	8	19	12	5283	7	9	10	5789	4	7	7	2884	5	1	6	5411	7	2	0	3613	4	7	4	5596	17	8	3	4891	6
470a9e64065d204f7a9db3f210382347_rep;size=298842;	k__Fungi	p__Ascomycota	c__Saccharomycetes	o__Saccharomycetales	f__Saccharomycetaceae	g__Torulaspora	s__Torulaspora_delbrueckii	721	1821	2835	1849	560	1668	2125	2065	675	1174	1623	2381	1326	4029	8258	7960	1353	2483	5109	8376	1219	1885	4690	4672	570	2115	4310	10586	866	2077	3116	5117	836	2705	5159	8462	1745	702	2478	7350	1482	936
9bd659040e1250439d5d72856aca0058_rep;size=172792;	k__Fungi	p__Ascomycota	c__Saccharomycetes	o__Saccharomycetales	f__Saccharomycetaceae	g__Kazachstania	s__Kazachstania_servazzii	1181	3081	3507	1802	870	2798	2677	2160	1207	1815	1760	2433	913	2227	2881	3429	1094	1557	2309	3860	1293	1609	3147	3182	677	1253	1656	3055	1250	1073	1089	1502	1054	1282	1448	1508	1766	1544	1427	3150	1588	1166
2a637fe5004f88382ea775518a327eb7_rep;size=152521;	k__Fungi	p__Ascomycota	c__Saccharomycetes	o__Saccharomycetales	f__Saccharomycodaceae	g__Hanseniaspora	s__Hanseniaspora_osmophila	13	79	97	62	9	56	93	53	24	52	64	66	15	78	194	191	21	60	122	231	36	63	149	206	13	154	440	1045	12	101	180	557	23	169	211	459	17	23	142	485	22	54
192e556111e8ee99412f8c1a6f581567_rep;size=128055;	k__Fungi	p__Ascomycota	c__Dothideomycetes	o__Pleosporales	f__Didymellaceae	g__Epicoccum	g__Epicoccum	3265	15	18	3	3194	10	4	4	4608	13	8	5	6885	7	9	13	4466	3	2	7	5256	0	4	5	2707	3	5	7	4672	1	7	0	2623	0	1	3	5641	16	12	8	3867	1
5175cc79caf6cdae8d388bbe033d5767_rep;size=127376;	k__Fungi	p__Ascomycota	c__Saccharomycetes	o__Saccharomycetales	f__Saccharomycodaceae	g__Hanseniaspora	s__Hanseniaspora_opuntiae	781	2907	3230	1558	725	2363	2569	1700	805	1978	1663	1905	602	1005	1003	1490	841	1044	1778	2739	899	1224	2436	2765	614	1289	1410	3321	990	1457	1388	3265	982	1877	2203	2269	1415	1342	817	2652	1230	1969
aceaacaf765f17c04955a173af4bb774_rep;size=120440;	k__Fungi	p__Ascomycota	c__Saccharomycetes	o__Saccharomycetales	f__Saccharomycetales_fam_Incertae_sedis	g__Candida	g__Candida	73	375	594	434	38	390	537	455	56	279	337	691	33	141	181	214	47	145	239	391	76	132	288	339	21	141	318	681	70	157	263	747	60	213	416	428	116	227	195	565	120	225
929ed9dd2ac3a1de6605f9e5ee14ff3c_rep;size=94249;	k__Fungi	p__Ascomycota	c__Saccharomycetes	o__Saccharomycetales	f__Pichiaceae	g__Pichia	s__Pichia_kluyveri	17	8	10	3	13	3	3	4	17	0	4	1	48	1	9	4	16	3	5	14	7	2	15	14	1	3	2	2	15	1	1	0	9	0	4	1	19	3	3	9	46	5
4e180ea17a7b95429bad1fb81f31a373_rep;size=70244;	k__Fungi	p__Ascomycota	c__Saccharomycetes	o__Saccharomycetales	f__Saccharomycetales_fam_Incertae_sedis	g__Candida	g__Candida	22	109	160	120	12	111	131	157	21	61	68	178	9	40	53	57	20	40	81	151	37	71	122	143	10	63	93	166	24	52	76	211	25	56	127	185	48	59	49	143	48	52
43eb17d1d2107cbba5beae21de81ff8f_rep;size=65644;	k__Fungi	p__Ascomycota	c__Saccharomycetes	o__Saccharomycetales	f__Saccharomycetales_fam_Incertae_sedis	g__Candida	g__Candida	33	119	176	140	33	116	169	160	39	95	107	207	16	53	62	88	45	69	99	184	55	61	123	172	19	60	119	199	28	54	120	251	51	81	165	193	75	72	55	176	63	69
67d4fd32faff4e3d2b33af7c62c745ee_rep;size=57438;	k__Fungi	p__Ascomycota	c__Dothideomycetes	o__Capnodiales	f__Cladosporiaceae	g__Cladosporium	g__Cladosporium	676	8	4	0	628	4	3	1	787	0	1	3	1159	2	1	3	903	0	3	2	901	0	0	0	445	0	0	0	914	2	0	0	550	0	1	0	1070	2	2	1	647	0
aa06d44c571ea990876853a43763a8f7_rep;size=53670;	k__Fungi	p__Ascomycota	c__Saccharomycetes	o__Saccharomycetales	f__Saccharomycetaceae	g__Kazachstania	s__Kazachstania_servazzii	340	985	1248	649	252	912	998	803	308	647	644	874	225	620	740	772	257	396	637	1045	382	498	904	989	222	356	495	998	323	351	398	513	283	410	471	529	482	531	449	1090	429	369
acb69cfba2949b83d2fb251a0b3e19cd_rep;size=50726;	k__Fungi	p__Ascomycota	c__Dothideomycetes	o__Capnodiales	f__Cladosporiaceae	g__Cladosporium	s__Cladosporium_ramotenellum	137	3	0	0	130	0	1	0	224	0	1	0	169	0	0	0	144	0	0	0	170	0	0	0	86	0	0	0	172	0	0	0	125	0	0	2	178	0	0	0	161	0
04b99aa27d31703d99e98f1a8ab3f074_rep;size=46042;	k__Fungi	p__Basidiomycota	c__Tremellomycetes	o__Cystofilobasidiales	f__Cystofilobasidiaceae	g__Cystofilobasidium	s__Cystofilobasidium_macerans	665	7	8	2	764	5	6	2	604	3	4	6	310	3	1	2	551	1	6	2	664	5	5	4	340	4	2	4	645	1	2	1	514	1	1	0	1177	2	4	4	1014	10
8185cfdc97f1082b4f3be86668618523_rep;size=45289;	k__Fungi	p__Ascomycota	c__Dothideomycetes	o__Pleosporales	f__Pleosporaceae	g__Alternaria	g__Alternaria	736	4	2	4	721	7	4	0	853	2	4	0	703	1	0	1	1139	3	0	0	1064	0	2	3	512	0	2	0	947	0	0	0	711	1	0	0	718	2	0	2	653	0
065234160f2bb8ca61f1d9dad8eada63_rep;size=41168;	k__Fungi	p__Ascomycota	c__Dothideomycetes	o__Pleosporales	f__Didymosphaeriaceae	g__Didymosphaeria	s__Didymosphaeria_variabile	497	2	2	2	505	1	1	2	749	2	0	2	528	4	4	2	515	2	0	0	617	0	0	0	279	2	1	1	448	0	1	0	412	1	0	0	527	0	0	1	446	2
2e868741628d95f075496318537024c0_rep;size=40218;	k__Fungi	p__Ascomycota	c__Dothideomycetes	o__Capnodiales	f__Cladosporiaceae	g__Cladosporium	g__Cladosporium	506	2	0	1	418	3	3	1	676	3	1	0	615	0	1	3	576	1	2	0	754	0	1	0	345	1	0	0	593	1	0	0	426	0	0	0	694	1	2	2	566	1
a920f3970e78c3417db14eeb55ab5f71_rep;size=35452;	k__Fungi	p__Ascomycota	c__Eurotiomycetes	o__Eurotiales	f__Aspergillaceae	g__Penicillium	g__Penicillium	18	0	0	0	34	0	0	0	58	0	0	0	23	0	0	0	43	0	0	0	42	0	0	1	32	0	0	0	26	0	1	0	27	0	0	0	51	0	0	0	52	0
c199ed78f10a220b8398e36676f72aae_rep;size=32341;	k__Fungi	p__Ascomycota	c__Leotiomycetes	o__Helotiales	f__Sclerotiniaceae	g__Botrytis	g__Botrytis	0	0	0	0	0	0	0	0	2	0	0	0	9	0	0	0	11	0	0	0	10	0	0	0	5	0	0	0	24	0	0	0	6	0	0	0	18	0	0	0	0	0
14c8d778c30e2961f2f8f2022bc0f6b7_rep;size=31102;	k__Fungi	p__Ascomycota	c__Saccharomycetes	o__Saccharomycetales	f__Saccharomycetales_fam_Incertae_sedis	g__Candida	g__Candida	19	79	107	69	12	57	96	74	12	37	60	94	7	28	35	48	16	26	46	75	15	32	64	71	7	45	56	86	13	33	48	133	22	45	66	96	43	52	37	76	25	35
cf286c654a3cf7c8ddc8c60e723b838a_rep;size=30926;	k__Fungi	p__Ascomycota	c__Saccharomycetes	o__Saccharomycetales	f__Pichiaceae	g__Pichia	s__Pichia_terricola	0	1	3	3	1	1	1	0	0	1	0	1	0	0	0	0	2	0	1	1	5	1	1	0	0	0	0	0	20	0	0	0	2	0	0	0	2	1	0	0	2	1
e5806532b20168f1363f90d1f05be4d9_rep;size=30852;	k__Fungi	p__Ascomycota	c__Saccharomycetes	o__Saccharomycetales	f__Saccharomycetales_fam_Incertae_sedis	g__Candida	g__Candida	11	102	159	123	18	102	126	124	14	77	83	156	12	31	47	47	19	22	53	74	17	27	55	58	11	26	72	136	20	29	67	134	17	53	78	105	28	61	55	149	25	45
c1b4f7476f9024e22532c5d079779fda_rep;size=29760;	k__Fungi	p__Ascomycota	c__Saccharomycetes	o__Saccharomycetales	f__Saccharomycodaceae	g__Hanseniaspora	s__Hanseniaspora_vineae	33	209	214	124	28	138	147	158	31	91	116	172	37	319	839	935	76	123	354	622	33	94	363	475	20	352	774	2041	64	173	202	722	31	228	247	676	33	99	360	1233	39	152
d3a1dade457aaa548291417e67db2cef_rep;size=29108;	k__Fungi	p__Ascomycota	c__Saccharomycetes	o__Saccharomycetales	f__Saccharomycetaceae	g__Saccharomyces	s__Saccharomyces_cerevisiae	0	1	5	6	1	0	4	7	2	0	4	8	0	0	0	1	0	0	0	4	0	0	3	2	3	2	3	2	0	0	1	6	0	1	1	4	0	0	2	12	0	0
d71514bf74b9cb757f982d37344f912a_rep;size=28914;	k__Fungi	p__Ascomycota	c__Saccharomycetes	o__Saccharomycetales	f__Saccharomycetaceae	g__Lachancea	s__Lachancea_thermotolerans	78	125	138	51	54	70	86	53	52	70	92	59	81	138	316	246	112	83	155	299	125	73	175	200	47	48	194	638	71	65	125	62	84	103	179	278	126	40	127	391	103	39
af8e214444d2861b65a22fd19d5a21a4_rep;size=28451;	k__Fungi	p__Basidiomycota	c__Tremellomycetes	o__Tremellales	f__Bulleribasidiaceae	g__Vishniacozyma	s__Vishniacozyma_carnescens	99	0	1	0	126	0	0	0	144	0	0	0	109	0	0	0	142	0	0	0	140	0	0	0	68	0	0	0	128	1	0	0	94	1	0	0	184	0	0	0	150	1
cf15e0ec159f95f568fe48402c1c2bbd_rep;size=27830;	k__Fungi	p__Ascomycota	c__Sordariomycetes	o__Xylariales	f__Amphisphaeriaceae	g__Seimatosporium	s__Seimatosporium_pistaciae	753	2	5	1	729	5	1	1	893	2	6	1	889	0	3	2	984	0	2	2	1107	0	0	1	542	1	0	5	824	2	0	0	578	1	1	0	1183	6	2	4	1016	3
23567ef88155066ea14693411a25e131_rep;size=27236;	k__Fungi	p__Ascomycota	c__Dothideomycetes	o__Pleosporales	f__Pleosporaceae	g__Alternaria	g__Alternaria	345	3	2	0	405	0	1	0	324	0	0	3	350	1	0	2	475	0	1	0	485	1	0	1	238	0	1	0	323	0	0	0	363	0	0	1	439	0	1	0	321	0
2a08b50b5fff656d2053270d5c210be3_rep;size=27030;	k__Fungi	p__Ascomycota	c__Saccharomycetes	o__Saccharomycetales	f__Saccharomycetales_fam_Incertae_sedis	g__Candida	g__Candida	8	36	45	49	3	43	46	44	14	33	38	74	3	17	26	17	7	15	46	66	13	24	40	42	5	18	42	64	9	13	37	88	13	25	42	46	28	26	20	55	19	26
e3f9b88a1ab5d39e9fbb235d998102e9_rep;size=25099;	k__Fungi	p__Ascomycota	c__Saccharomycetes	o__Saccharomycetales	f__Saccharomycodaceae	g__Hanseniaspora	s__Hanseniaspora_vineae	44	180	186	130	33	130	154	105	28	109	115	154	36	256	489	605	37	72	249	473	44	88	292	303	16	316	618	1781	35	166	147	573	36	177	218	574	29	86	323	1028	27	146
c5182b45cf6c8ae7f9d8e999378cc812_rep;size=24550;	x__Unassigned	x__Unassigned	x__Unassigned	x__Unassigned	x__Unassigned	x__Unassigned	x__Unassigned	529	0	5	1	502	0	5	0	413	0	2	0	229	0	3	2	474	0	0	1	491	0	6	4	333	0	1	2	421	0	0	1	351	0	0	0	936	0	0	0	791	3
a54e3d23c6665b49c357b3fa95c2b2c2_rep;size=22786;	k__Fungi	p__Ascomycota	c__Saccharomycetes	o__Saccharomycetales	f__Saccharomycetales_fam_Incertae_sedis	g__Candida	g__Candida	18	68	84	70	5	50	71	68	16	41	41	101	10	20	35	40	11	24	51	71	29	28	57	68	9	21	48	85	17	17	49	83	18	50	60	89	20	29	25	76	22	30
d7895d617df66413b483fdcb315b92b6_rep;size=21417;	k__Fungi	p__Ascomycota	c__Saccharomycetes	o__Saccharomycetales	f__Saccharomycetaceae	g__Kazachstania	s__Kazachstania_aerobia	393	86	154	77	280	71	89	70	354	41	65	70	935	372	493	621	709	142	214	386	638	86	196	205	214	43	83	166	404	37	49	38	389	35	53	44	448	76	52	120	420	14
1a9cb5208e99359be0e0d35719d2826c_rep;size=20446;	k__Fungi	p__Ascomycota	c__Saccharomycetes	o__Saccharomycetales	f__Saccharomycodaceae	g__Hanseniaspora	s__Hanseniaspora_vineae	10	125	148	84	19	98	118	77	24	66	69	89	40	291	805	938	42	123	333	627	19	87	405	442	14	194	605	1574	24	120	164	596	12	128	201	512	19	56	229	871	14	85
e43e7d3c8c8b57de3850071353acf807_rep;size=19751;	k__Fungi	p__Ascomycota	c__Saccharomycetes	o__Saccharomycetales	f__Saccharomycetaceae	g__Saccharomyces	s__Saccharomyces_cerevisiae	0	3	11	34	0	6	11	33	0	2	8	45	0	0	3	8	0	0	9	13	0	2	1	3	0	2	5	24	0	0	7	9	0	0	10	12	0	2	4	23	0	0
c9c49874d0e4bd57d1da6241c6c9111d_rep;size=19495;	k__Fungi	p__Ascomycota	c__Saccharomycetes	o__Saccharomycetales	f__Saccharomycetaceae	g__Pichia	s__Pichia_fermentans	5	1	3	3	4	0	2	1	9	1	1	0	12	0	5	2	27	0	2	4	4	1	1	7	3	1	2	3	6	0	0	1	11	0	1	1	3	1	1	1	15	2
7f97a0e16aba8422f06092a64e750a43_rep;size=19432;	k__Fungi	p__Ascomycota	c__Dothideomycetes	o__Pleosporales	f__Pleosporaceae	g__Stemphylium	g__Stemphylium	166	2	2	0	328	2	0	0	303	0	0	1	252	0	0	1	269	0	0	0	216	0	0	0	129	0	1	1	235	0	0	0	178	0	0	1	283	1	0	1	165	0
e7417306aaa1217c5e6325432357f93b_rep;size=18399;	k__Fungi	p__Ascomycota	c__Saccharomycetes	o__Saccharomycetales	f__Saccharomycetales_fam_Incertae_sedis	g__Candida	s__Candida_sojae	187	63	99	18	168	70	52	22	205	40	45	23	130	27	29	21	220	33	38	28	234	22	63	45	101	18	11	13	196	23	19	6	171	13	10	9	398	37	21	19	339	45
1fc1651014d121ab5ba01568308722aa_rep;size=17368;	k__Fungi	p__Ascomycota	c__Saccharomycetes	o__Saccharomycetales	f__Saccharomycetaceae	g__Saccharomyces	s__Saccharomyces_cerevisiae	3	48	92	96	0	32	76	60	1	29	30	89	3	70	104	96	3	29	83	148	8	25	71	92	4	21	87	231	2	15	56	122	1	27	82	123	1	12	58	181	0	24
a754809478c98b7fcaa55e171bf4e4c1_rep;size=17354;	k__Fungi	p__Basidiomycota	c__Tremellomycetes	o__Tremellales	f__Bulleribasidiaceae	g__Vishniacozyma	s__Vishniacozyma_victoriae	94	0	0	1	104	0	0	0	103	0	0	0	58	0	0	0	105	0	0	0	74	0	1	1	44	1	0	0	92	0	0	0	64	0	0	0	124	0	0	0	126	1
98d70e575f285b838fd52d5b5d3dea64_rep;size=16890;	k__Fungi	p__Ascomycota	c__Saccharomycetes	o__Saccharomycetales	f__Metschnikowiaceae	g__Metschnikowia	g__Metschnikowia	67	29	9	6	48	18	7	5	60	14	9	8	44	12	16	12	145	7	12	8	67	9	33	21	42	7	3	1	67	3	4	0	60	5	0	1	94	9	3	6	97	7
0de944e567f9e1c0c8fc32b69b6cf177_rep;size=15953;	k__Fungi	p__Basidiomycota	c__Microbotryomycetes	o__Sporidiobolales	f__Sporidiobolaceae	g__Sporobolomyces	g__Sporobolomyces	208	0	0	2	166	1	2	2	208	0	0	1	106	0	1	1	172	0	0	0	191	0	1	1	122	0	0	0	200	0	1	0	140	0	0	0	254	0	0	2	185	3
9adc0ce42f393bd07837904445e6ff95_rep;size=15614;	k__Fungi	p__Ascomycota	c__Eurotiomycetes	o__Eurotiales	f__Aspergillaceae	g__Penicillium	s__Penicillium_paneum	4	2	1	1	0	0	0	0	0	0	0	0	143	0	1	0	2	0	0	0	1	0	0	0	0	0	0	0	23	1	0	0	0	0	0	0	0	0	0	0	0	0
248fe362576b2094286ff524147c3cb6_rep;size=14495;	k__Fungi	p__Basidiomycota	c__Tremellomycetes	o__Filobasidiales	f__Filobasidiaceae	g__Filobasidium	g__Filobasidium	73	0	0	0	82	2	1	0	67	0	0	0	37	0	0	0	92	0	1	0	100	0	0	0	49	0	0	0	67	0	0	0	78	0	0	0	161	0	0	0	151	0
520c70209e7fc7e89985416640165cab_rep;size=14181;	k__Fungi	p__Ascomycota	c__Saccharomycetes	o__Saccharomycetales	f__Saccharomycetales_fam_Incertae_sedis	g__Candida	g__Candida	2	19	27	9	2	14	15	20	1	9	21	17	2	2	4	10	2	0	9	19	2	4	15	14	1	6	8	20	2	9	3	39	2	10	19	35	3	12	7	15	0	3
f28171b38392338cb134e5e61a5aa905_rep;size=13814;	k__Fungi	p__Ascomycota	c__Saccharomycetes	o__Saccharomycetales	f__Metschnikowiaceae	g__Metschnikowia	g__Metschnikowia	58	17	14	3	50	13	10	7	87	8	5	8	90	19	26	27	219	18	37	28	196	14	34	33	74	13	3	7	137	5	2	0	68	1	1	2	158	12	5	2	158	8
02d02bd541c753fa844cf260a245b8a2_rep;size=13699;	k__Fungi	p__Ascomycota	c__Dothideomycetes	o__Pleosporales	f__Lophiostomataceae	g__Lophiostoma	s__Lophiostoma_cynaroidis	194	0	2	1	205	2	1	2	259	1	1	0	221	0	0	1	235	1	1	0	250	1	0	0	135	1	0	2	259	0	0	0	191	0	0	0	197	0	0	2	167	1
0b42d185dbedd163c26ea4f26b4a49c7_rep;size=13513;	k__Fungi	p__Ascomycota	c__Saccharomycetes	o__Saccharomycetales	f__Saccharomycetales_fam_Incertae_sedis	g__Candida	s__Candida_bracarensis	7	45	49	46	5	46	43	40	3	24	35	58	4	10	14	27	3	9	16	22	9	12	24	22	3	8	28	45	5	13	19	63	5	13	35	41	10	31	22	43	10	21
cbccca19652c39f421e17dc92ab837ef_rep;size=12857;	k__Fungi	p__Ascomycota	c__Saccharomycetes	o__Saccharomycetales	f__Saccharomycetales_fam_Incertae_sedis	g__Candida	g__Candida	6	20	36	25	5	24	51	32	5	33	29	34	3	7	12	13	6	14	27	36	16	13	31	36	4	12	15	39	8	13	33	69	8	23	28	36	13	14	5	35	11	20
088fa1bb6a9d1c59e115c66510a95162_rep;size=12127;	k__Fungi	p__Ascomycota	c__Saccharomycetes	o__Saccharomycetales	f__Saccharomycetaceae	g__Saccharomyces	s__Saccharomyces_cerevisiae	0	0	0	0	0	0	0	0	0	0	0	0	0	0	0	0	0	0	0	0	0	0	0	0	0	0	0	0	0	0	0	0	0	0	0	0	0	0	0	0	0	0
d6893193579c2f2cbdede20b316e38e6_rep;size=11442;	k__Fungi	p__Ascomycota	c__Saccharomycetes	o__Saccharomycetales	f__Saccharomycodaceae	g__Hanseniaspora	s__Hanseniaspora_valbyensis	9	99	98	71	8	108	71	72	13	71	49	75	5	108	171	188	13	66	94	99	17	44	103	97	8	164	544	1006	14	118	202	549	23	134	239	306	20	49	278	1262	8	68
82c8d10a61fee07ce6efd746b81799d3_rep;size=10822;	k__Fungi	p__Ascomycota	c__Saccharomycetes	o__Saccharomycetales	f__Saccharomycetales_fam_Incertae_sedis	g__Candida	g__Candida	86	0	1	0	108	2	1	0	143	1	0	0	78	0	0	0	100	1	0	0	95	0	0	0	53	2	0	0	116	0	0	0	74	0	0	0	125	1	1	0	94	0
458f550cff676a3b9b1ea158b2bb3804_rep;size=10739;	k__Fungi	p__Ascomycota	c__Saccharomycetes	o__Saccharomycetales	f__Saccharomycetales_fam_Incertae_sedis	g__Candida	g__Candida	4	17	41	20	5	17	20	30	3	19	22	30	1	13	18	8	3	3	12	34	4	16	24	17	2	10	21	24	2	16	16	36	4	13	23	35	9	14	8	40	8	15
7cb3a5f795146d1d01ff1467ba362b3a_rep;size=10425;	x__sub0.01	x__sub0.01	x__sub0.01	x__sub0.01	x__sub0.01	x__sub0.01	x__sub0.01	8	29	36	35	5	20	40	37	6	22	29	43	5	5	13	11	5	5	26	35	7	14	19	32	3	12	16	33	9	10	27	53	11	10	20	29	12	12	12	28	9	16
ebc92499b8ff97faf4b513ce9dff7843_rep;size=10012;	k__Fungi	p__Ascomycota	c__Dothideomycetes	o__Botryosphaeriales	f__Botryosphaeriaceae	g__Diplodia	s__Diplodia_seriata	183	7	2	2	140	0	3	0	355	3	3	1	407	3	0	1	221	1	1	2	378	2	2	2	144	1	1	1	338	1	0	0	177	1	0	0	282	2	3	2	285	1
e29b895081f914e01a4f0fd03bb3d76e_rep;size=8093;	x__sub0.01	x__sub0.01	x__sub0.01	x__sub0.01	x__sub0.01	x__sub0.01	x__sub0.01	123	1	3	0	234	1	0	0	368	0	1	0	305	0	0	0	402	0	0	0	321	0	0	0	181	0	1	1	328	0	0	0	163	0	1	0	448	0	1	0	388	1
be0a90e306637ab1706a3c40e7cb67fc_rep;size=8083;	k__Fungi	p__Ascomycota	c__Saccharomycetes	o__Saccharomycetales	f__Saccharomycetaceae	g__Saccharomyces	s__Saccharomyces_cerevisiae	0	0	0	0	0	0	0	0	0	0	0	0	0	0	0	0	0	0	0	0	0	0	0	0	0	0	0	0	0	0	0	0	0	0	0	0	0	0	0	0	0	0
e275b97cfd9f38013f8b2fa887d236b5_rep;size=7743;	x__sub0.01	x__sub0.01	x__sub0.01	x__sub0.01	x__sub0.01	x__sub0.01	x__sub0.01	95	2	0	0	91	0	0	1	82	0	0	1	114	0	0	0	121	0	0	0	117	1	0	3	44	0	0	0	117	0	0	0	62	0	0	0	175	0	0	0	219	2
0a66db19d52233b6dde95302de91ed7b_rep;size=7676;	x__sub0.01	x__sub0.01	x__sub0.01	x__sub0.01	x__sub0.01	x__sub0.01	x__sub0.01	171	0	2	0	238	1	2	1	194	1	1	0	147	0	0	0	183	0	0	1	190	0	0	0	121	0	0	0	140	0	0	0	142	0	0	0	321	0	0	0	234	1
d7d67d09a5de0daa6b04b8f5bb58ef6a_rep;size=7467;	x__sub0.01	x__sub0.01	x__sub0.01	x__sub0.01	x__sub0.01	x__sub0.01	x__sub0.01	6	19	17	9	6	8	26	15	1	6	13	14	2	6	7	5	7	3	10	20	2	10	9	14	0	8	10	22	0	4	13	20	4	8	22	26	3	8	14	30	5	9
706c4d13089e82c18af38c83db95568a_rep;size=7454;	x__sub0.01	x__sub0.01	x__sub0.01	x__sub0.01	x__sub0.01	x__sub0.01	x__sub0.01	0	45	80	145	0	39	62	145	0	26	71	174	0	17	61	69	0	16	36	86	0	10	70	94	0	17	62	188	2	11	49	76	1	16	56	152	1	6	73	256	0	4
505e6305015c1210f789aab5feb7ab98_rep;size=7399;	x__sub0.01	x__sub0.01	x__sub0.01	x__sub0.01	x__sub0.01	x__sub0.01	x__sub0.01	5	18	20	21	5	21	30	28	2	11	25	24	0	4	6	22	4	3	15	13	4	5	9	10	2	3	7	20	3	9	10	30	2	9	10	15	3	6	3	20	3	10
1b54c4b4c577cb7ee8140dcbbe44267d_rep;size=7281;	x__sub0.01	x__sub0.01	x__sub0.01	x__sub0.01	x__sub0.01	x__sub0.01	x__sub0.01	6	75	63	45	8	56	58	41	10	55	30	49	4	63	102	132	6	58	109	106	8	50	67	106	4	91	321	563	4	80	113	372	4	96	139	223	17	44	175	745	4	37
7886c06c49722be5908381d6f3d44a5f_rep;size=7104;	x__sub0.01	x__sub0.01	x__sub0.01	x__sub0.01	x__sub0.01	x__sub0.01	x__sub0.01	114	1	0	0	110	0	0	0	193	1	1	0	116	0	0	0	92	0	0	0	176	0	0	2	61	0	0	1	98	0	0	0	90	1	0	0	146	0	1	0	104	1
243f60d0836e23a22285bab9fddddb02_rep;size=6790;	k__Fungi	p__Ascomycota	c__Eurotiomycetes	o__Eurotiales	f__Aspergillaceae	g__Penicillium	g__Penicillium	12	0	0	0	14	1	0	0	32	0	0	0	17	0	0	0	15	0	0	0	23	0	0	0	5	0	0	0	32	0	0	0	7	0	0	0	16	0	0	0	21	0
814649619729d58e1674543630de61da_rep;size=6600;	k__Fungi	p__Ascomycota	c__Eurotiomycetes	o__Eurotiales	f__Aspergillaceae	g__Penicillium	g__Penicillium	5	0	0	0	5	0	0	0	10	0	0	0	26	0	0	0	6	0	0	0	11	0	0	0	6	0	0	0	26	0	0	0	6	0	0	0	16	0	1	0	9	0
1bc4e0437deef5204c4ca12376899833_rep;size=6493;	x__sub0.01	x__sub0.01	x__sub0.01	x__sub0.01	x__sub0.01	x__sub0.01	x__sub0.01	1	17	23	24	4	11	25	22	2	13	13	28	3	6	8	9	1	3	9	17	3	7	12	18	1	9	13	18	2	8	12	22	5	3	8	19	1	13	15	20	1	6
3ef4b52a19133635332cdcb93d3d9c9c_rep;size=6490;	x__sub0.01	x__sub0.01	x__sub0.01	x__sub0.01	x__sub0.01	x__sub0.01	x__sub0.01	3	52	49	26	14	40	38	34	10	19	29	32	6	76	145	215	12	27	77	154	6	35	111	129	6	51	185	451	5	23	53	205	1	48	64	167	8	26	76	279	10	35
d6e7349ea994dd3deea0a37b62db9a3e_rep;size=6281;	x__sub0.01	x__sub0.01	x__sub0.01	x__sub0.01	x__sub0.01	x__sub0.01	x__sub0.01	0	46	80	113	0	30	62	127	0	17	63	167	0	21	42	62	1	13	32	87	0	11	67	83	0	7	55	169	0	7	33	102	1	15	56	125	0	4	43	236	0	14
ec7dc568846f35af223a283388548652_rep;size=6257;	x__sub0.01	x__sub0.01	x__sub0.01	x__sub0.01	x__sub0.01	x__sub0.01	x__sub0.01	65	1	0	0	76	0	0	0	129	1	0	1	128	1	1	0	158	0	0	1	184	0	0	0	65	0	0	0	109	0	0	0	68	0	0	0	118	1	0	0	99	0
8305e98bfb86861241c00bdf741edd76_rep;size=6012;	k__Fungi	p__Ascomycota	c__Saccharomycetes	o__Saccharomycetales	f__Saccharomycetaceae	g__Pichia	s__Pichia_occidentalis	3	0	0	1	13	0	2	0	0	1	0	0	3	0	0	2	17	0	0	0	0	0	0	3	7	0	0	1	14	1	0	0	4	1	0	0	9	1	0	0	3	0
a26d3dfa9c18388be34e686584974b69_rep;size=5961;	x__sub0.01	x__sub0.01	x__sub0.01	x__sub0.01	x__sub0.01	x__sub0.01	x__sub0.01	147	1	0	0	115	2	0	0	200	0	2	0	204	1	0	0	196	0	0	1	167	0	0	0	108	0	0	0	143	0	0	0	117	0	0	0	252	1	0	0	159	1
aac65bdfee7699fd5a42ac82e8480dbd_rep;size=5931;	x__sub0.01	x__sub0.01	x__sub0.01	x__sub0.01	x__sub0.01	x__sub0.01	x__sub0.01	0	3	8	4	0	2	11	5	0	4	4	5	0	0	0	2	0	1	3	2	1	3	7	3	0	0	3	12	0	2	1	7	0	5	9	10	1	0	0	3	0	0
8aa62df141a062393c24a337f24e89cb_rep;size=5886;	x__sub0.01	x__sub0.01	x__sub0.01	x__sub0.01	x__sub0.01	x__sub0.01	x__sub0.01	3	13	24	12	0	11	22	15	8	10	21	23	4	6	5	9	2	12	10	14	4	8	16	8	1	6	8	25	5	7	6	32	11	7	17	14	5	13	10	8	2	6
fb9cf2fdaf01d9a7c77d540dc3d7466b_rep;size=5829;	x__sub0.01	x__sub0.01	x__sub0.01	x__sub0.01	x__sub0.01	x__sub0.01	x__sub0.01	3	18	18	14	1	17	16	11	2	12	11	23	2	6	13	4	0	8	8	14	4	6	11	8	0	2	11	21	4	4	10	22	7	3	9	19	7	6	7	20	4	5
3f8f1f34093343485bcbb086bbeba1f6_rep;size=5767;	x__sub0.01	x__sub0.01	x__sub0.01	x__sub0.01	x__sub0.01	x__sub0.01	x__sub0.01	7	13	31	20	1	18	22	24	1	16	14	30	0	3	6	6	0	4	13	9	3	5	14	10	4	3	16	24	3	2	12	38	4	17	24	24	7	13	8	25	4	10
8f2121a7c610ab9ac18188b446f7423f_rep;size=5690;	x__sub0.01	x__sub0.01	x__sub0.01	x__sub0.01	x__sub0.01	x__sub0.01	x__sub0.01	0	97	159	113	0	81	154	108	0	36	97	110	0	39	101	118	1	23	67	147	0	11	125	159	0	22	72	255	0	22	77	163	0	37	78	146	1	14	83	181	0	30
04e037c39c3895d8433e18d1fa292af3_rep;size=5590;	x__sub0.01	x__sub0.01	x__sub0.01	x__sub0.01	x__sub0.01	x__sub0.01	x__sub0.01	5	10	15	20	0	13	22	17	3	14	11	25	3	4	6	10	0	8	11	20	4	4	14	14	0	3	14	16	3	11	15	21	1	8	19	22	9	10	11	16	6	2
bdabb97cbaad9b851bb4a015876b5532_rep;size=5345;	x__sub0.01	x__sub0.01	x__sub0.01	x__sub0.01	x__sub0.01	x__sub0.01	x__sub0.01	1	15	23	14	1	12	7	10	2	8	9	12	7	4	8	4	2	4	6	14	3	3	15	14	0	1	10	12	4	3	17	16	4	8	13	6	10	3	0	14	5	4
00fec325b5706470c228658864426461_rep;size=5288;	x__sub0.01	x__sub0.01	x__sub0.01	x__sub0.01	x__sub0.01	x__sub0.01	x__sub0.01	83	1	1	0	84	1	1	0	94	0	0	0	46	0	0	1	60	0	0	2	60	0	0	0	58	0	0	0	66	0	0	0	64	0	0	0	88	0	0	0	80	1
523fe1b490a16531c152ba7480cece49_rep;size=5285;	x__sub0.01	x__sub0.01	x__sub0.01	x__sub0.01	x__sub0.01	x__sub0.01	x__sub0.01	5	13	16	15	5	14	26	18	3	10	4	27	0	4	10	9	3	7	17	14	9	9	17	20	2	4	11	28	3	6	10	20	4	7	12	25	4	11	5	15	4	12
3989fdf392476d4d1b8982aad8e8b05a_rep;size=5278;	x__sub0.01	x__sub0.01	x__sub0.01	x__sub0.01	x__sub0.01	x__sub0.01	x__sub0.01	51	163	99	89	17	98	66	72	42	98	56	85	33	18	27	35	34	20	32	57	55	16	43	54	31	53	28	91	37	21	18	47	35	31	27	42	64	46	27	123	52	92
fa91c5c913fa83912af906739fbdc817_rep;size=5165;	k__Fungi	p__Ascomycota	c__Eurotiomycetes	o__Eurotiales	f__Aspergillaceae	g__Aspergillus	s__Aspergillus_niger	0	0	0	0	0	0	0	0	2	0	0	0	0	0	0	0	2	0	0	0	1	0	0	0	0	0	0	0	0	0	0	0	1	0	0	0	1	0	0	0	0	0
65d440d7652d303a147d5c72ad759486_rep;size=5072;	x__sub0.01	x__sub0.01	x__sub0.01	x__sub0.01	x__sub0.01	x__sub0.01	x__sub0.01	2	38	44	25	2	27	35	26	4	37	20	45	3	46	83	60	2	27	22	18	2	15	22	26	2	81	285	517	5	73	79	193	5	76	101	117	5	29	150	622	10	33
034c1d19637bb5b0653a341ba64d9359_rep;size=4868;	x__sub0.01	x__sub0.01	x__sub0.01	x__sub0.01	x__sub0.01	x__sub0.01	x__sub0.01	4	0	0	0	8	0	0	0	5	0	0	0	3	0	0	0	2	0	0	0	0	0	0	0	7	0	0	0	6	0	0	0	3	0	0	0	5	0	0	0	14	0
bcda681fad0f916ad08785710361bb8c_rep;size=4729;	k__Fungi	p__Ascomycota	c__Eurotiomycetes	o__Eurotiales	f__Aspergillaceae	g__Aspergillus	s__Aspergillus_niger	8	0	0	0	8	0	0	0	13	0	0	0	6	0	0	0	11	0	0	0	2	0	0	0	3	0	1	0	6	0	0	0	2	0	0	1	7	0	0	0	6	0
63e930664ae5a8aabf48735c4513505c_rep;size=4605;	x__sub0.01	x__sub0.01	x__sub0.01	x__sub0.01	x__sub0.01	x__sub0.01	x__sub0.01	97	1	0	0	113	3	0	0	159	0	0	1	136	0	0	0	131	0	0	0	155	0	0	0	88	0	0	0	107	0	0	0	101	0	1	0	213	0	0	0	167	0
74bb0475114223c71ca2e73fdbc584a8_rep;size=4464;	k__Fungi	p__Ascomycota	c__Eurotiomycetes	o__Eurotiales	f__Aspergillaceae	g__Penicillium	g__Penicillium	0	0	0	0	0	0	0	0	1	0	0	0	0	0	0	0	1	0	0	0	0	0	0	0	0	0	0	0	0	0	0	0	0	0	0	0	0	0	0	0	2	0
3007e43d17293c42da60fdbd9f64411c_rep;size=4458;	x__sub0.01	x__sub0.01	x__sub0.01	x__sub0.01	x__sub0.01	x__sub0.01	x__sub0.01	82	0	0	0	84	0	0	0	142	0	0	0	147	0	0	0	119	0	0	0	138	0	0	0	76	0	0	0	80	1	0	0	65	0	0	0	83	0	0	1	84	0
b8668a9719a5886cdb23c6dcc94357f2_rep;size=4361;	x__sub0.01	x__sub0.01	x__sub0.01	x__sub0.01	x__sub0.01	x__sub0.01	x__sub0.01	3	11	17	12	0	9	17	15	2	11	10	22	0	6	3	7	4	3	10	20	5	3	17	15	2	2	13	21	3	6	11	16	4	9	14	17	6	7	6	21	8	9
7b880d2c1d4d050875521f0896b9019c_rep;size=4053;	k__Fungi	p__Ascomycota	c__Saccharomycetes	o__Saccharomycetales	f__Phaffomycetaceae	g__Wickerhamomyces	s__Wickerhamomyces_anomalus	30	3	5	3	7	0	3	3	12	0	0	1	4	3	5	11	15	4	8	3	21	4	10	9	13	0	1	5	12	1	3	1	11	0	1	0	14	0	1	1	16	5
e314c56aa8d6a816daf72b264e769f5d_rep;size=4050;	x__sub0.01	x__sub0.01	x__sub0.01	x__sub0.01	x__sub0.01	x__sub0.01	x__sub0.01	49	0	0	0	66	1	0	0	78	0	0	0	82	0	0	0	86	0	0	0	80	0	0	0	45	0	0	0	74	0	0	0	68	0	0	0	45	0	0	0	74	1
fb368e268b8a25096473dce45a8f2d43_rep;size=3766;	k__Fungi	p__Ascomycota	c__Saccharomycetes	o__Saccharomycetales	f__Metschnikowiaceae	g__Metschnikowia	s__Metschnikowia_pulcherrima	3	2	0	0	10	2	0	0	3	0	0	0	6	0	0	0	1	0	2	0	8	3	2	0	9	0	0	0	11	1	0	0	2	0	0	0	5	1	0	0	14	0
5b45e001c9829349977c67c95f1a6e64_rep;size=3749;	k__Fungi	p__Ascomycota	c__Saccharomycetes	o__Saccharomycetales	f__Saccharomycetaceae	g__Pichia	s__Pichia_kudriavzevii	8	4	0	2	2	6	5	4	21	1	1	3	7	0	6	3	6	0	0	6	19	2	3	5	7	0	0	2	8	2	0	0	9	0	2	2	21	0	2	3	6	0
3975d086e6628cad0823f343b26ed461_rep;size=3702;	x__sub0.01	x__sub0.01	x__sub0.01	x__sub0.01	x__sub0.01	x__sub0.01	x__sub0.01	0	2	4	1	0	5	1	3	0	2	4	3	0	1	0	1	0	1	1	3	0	0	3	3	0	0	1	4	0	0	0	3	0	0	4	2	0	2	1	6	1	1
8d44487fa32a543b59595d6fd1159b2e_rep;size=3643;	x__sub0.01	x__sub0.01	x__sub0.01	x__sub0.01	x__sub0.01	x__sub0.01	x__sub0.01	5	10	18	16	2	16	7	11	0	6	13	14	0	3	6	10	1	0	8	5	1	4	4	10	1	5	5	18	2	5	9	26	0	3	8	12	6	5	7	22	2	10
69016fffdeed6eeeafe8f78712631a84_rep;size=3557;	x__sub0.01	x__sub0.01	x__sub0.01	x__sub0.01	x__sub0.01	x__sub0.01	x__sub0.01	0	1	3	1	11	2	1	0	6	1	1	0	8	3	3	0	10	1	0	3	2	0	4	0	4	0	1	1	3	0	0	0	8	0	0	0	6	1	0	1	17	1
045b2259dd6e223b440fd014eac7a875_rep;size=3532;	x__sub0.01	x__sub0.01	x__sub0.01	x__sub0.01	x__sub0.01	x__sub0.01	x__sub0.01	3	5	9	2	0	5	5	1	0	2	4	7	1	3	1	1	0	3	3	3	1	3	3	6	1	3	1	6	1	4	3	9	1	2	4	10	3	0	1	3	0	3
093d779c0cbef1b20e553517d21e16c8_rep;size=3420;	k__Fungi	p__Ascomycota	c__Saccharomycetes	o__Saccharomycetales	f__Saccharomycetaceae	g__Saccharomyces	g__Saccharomyces	0	1	2	1	0	0	0	1	0	0	0	0	1	0	1	1	0	0	1	0	0	0	0	3	0	0	1	2	0	0	0	0	0	1	1	0	0	0	1	0	0	0
71cf742afb04930dfca5dbda872090cf_rep;size=3404;	x__sub0.01	x__sub0.01	x__sub0.01	x__sub0.01	x__sub0.01	x__sub0.01	x__sub0.01	1	7	16	5	3	11	18	12	1	8	12	19	0	1	3	3	2	3	3	11	2	0	6	8	0	2	5	11	3	3	11	21	4	4	15	17	4	3	3	17	6	5
6499c9133873a77a62b193f37c808fc9_rep;size=3147;	x__sub0.01	x__sub0.01	x__sub0.01	x__sub0.01	x__sub0.01	x__sub0.01	x__sub0.01	38	0	0	0	50	0	0	0	55	0	0	0	34	1	0	0	32	0	0	1	48	1	0	1	21	0	0	0	45	0	0	0	29	0	0	0	35	0	0	0	34	0
1ffc5cf72ac7c2c9835f2a634ff51b6b_rep;size=3006;	x__Unassigned	x__Unassigned	x__Unassigned	x__Unassigned	x__Unassigned	x__Unassigned	x__Unassigned	0	0	0	0	0	0	0	0	1	0	0	0	1	0	0	0	0	0	0	0	0	0	0	0	1	0	0	0	3	0	0	0	0	0	0	0	6	0	0	0	0	0
591e3d55cf60062d07d5308ab69fd0d0_rep;size=2999;	x__sub0.01	x__sub0.01	x__sub0.01	x__sub0.01	x__sub0.01	x__sub0.01	x__sub0.01	63	0	0	0	58	0	0	0	74	0	0	0	75	0	0	0	73	0	0	0	57	0	0	0	33	0	0	0	66	0	0	1	44	0	0	0	39	0	0	0	34	0
6357a38ce343c05a10e5634694057dbe_rep;size=2977;	x__sub0.01	x__sub0.01	x__sub0.01	x__sub0.01	x__sub0.01	x__sub0.01	x__sub0.01	1	8	10	25	0	5	12	21	0	5	5	27	0	3	12	8	0	0	4	13	0	2	14	17	0	0	6	29	0	5	3	20	0	3	6	24	0	0	8	40	0	1
68b98c60a47a598256d298f330fff9c5_rep;size=2893;	x__sub0.01	x__sub0.01	x__sub0.01	x__sub0.01	x__sub0.01	x__sub0.01	x__sub0.01	1	3	5	6	0	0	3	3	0	1	6	4	0	2	4	8	0	0	4	2	0	1	2	3	0	1	2	5	0	1	0	3	0	1	2	2	0	2	3	10	0	2
9983336868de41d9f81fe5be58ff7df9_rep;size=2884;	x__sub0.01	x__sub0.01	x__sub0.01	x__sub0.01	x__sub0.01	x__sub0.01	x__sub0.01	73	0	0	0	55	0	0	0	57	0	0	0	119	0	1	0	64	0	0	1	94	2	0	1	39	1	1	0	68	0	0	0	54	0	0	0	63	0	0	1	81	0
778135862cb82b83832d8f802d075b0b_rep;size=2858;	x__primer_dimer	x__primer_dimer	x__primer_dimer	x__primer_dimer	x__primer_dimer	x__primer_dimer	x__primer_dimer	14	0	0	0	0	1	0	0	0	0	0	0	8	1	0	0	1	0	0	0	0	0	1	0	0	0	0	0	6	0	0	0	0	0	0	0	0	0	0	0	16	0
4b44931da00beef6656307b7392b63e8_rep;size=2809;	x__sub0.01	x__sub0.01	x__sub0.01	x__sub0.01	x__sub0.01	x__sub0.01	x__sub0.01	23	0	3	0	8	1	1	0	13	0	0	1	19	0	1	2	38	0	1	1	24	0	0	0	23	0	0	0	25	0	0	0	15	0	0	0	38	0	0	0	18	0
de10a61a611f35d2924f638763eed790_rep;size=2800;	x__sub0.01	x__sub0.01	x__sub0.01	x__sub0.01	x__sub0.01	x__sub0.01	x__sub0.01	0	6	3	0	0	5	3	3	0	1	2	2	0	0	0	1	0	0	0	4	0	0	0	1	0	1	1	3	0	1	2	7	0	1	0	0	0	2	1	2	0	1
cbe14639a57eb7f665b708c7eae12e40_rep;size=2787;	x__sub0.01	x__sub0.01	x__sub0.01	x__sub0.01	x__sub0.01	x__sub0.01	x__sub0.01	0	3	13	7	0	13	6	7	0	1	4	13	0	2	4	5	0	0	2	2	1	0	10	9	1	1	7	14	1	1	6	11	0	3	9	13	1	5	9	9	1	6
a19478184384d2b833a9b8ca86c6da6c_rep;size=2712;	x__sub0.01	x__sub0.01	x__sub0.01	x__sub0.01	x__sub0.01	x__sub0.01	x__sub0.01	25	1	0	0	17	0	0	0	22	0	0	1	12	0	0	0	25	0	0	0	23	1	0	0	22	0	0	0	27	0	1	0	20	0	0	0	35	0	0	0	23	0
f5e9108ff8ecec20615d0346d6697104_rep;size=2644;	x__sub0.01	x__sub0.01	x__sub0.01	x__sub0.01	x__sub0.01	x__sub0.01	x__sub0.01	18	76	61	39	21	44	26	33	13	48	12	40	17	15	17	22	19	5	11	21	14	14	22	19	17	15	20	43	23	21	10	30	14	23	10	24	24	29	12	82	25	56
636f05b96365c9ead2052341c75183e7_rep;size=2638;	x__sub0.01	x__sub0.01	x__sub0.01	x__sub0.01	x__sub0.01	x__sub0.01	x__sub0.01	83	0	0	0	92	1	2	0	71	0	1	0	36	0	1	1	100	0	0	0	92	0	0	0	53	1	0	0	84	0	0	0	75	0	0	0	142	0	0	0	88	0
44b6863f3a21f289ad577ee2b8185940_rep;size=2594;	x__sub0.01	x__sub0.01	x__sub0.01	x__sub0.01	x__sub0.01	x__sub0.01	x__sub0.01	29	0	0	0	34	0	0	1	38	0	0	0	33	0	0	0	39	0	0	0	40	0	0	0	14	0	0	0	26	0	0	0	40	0	0	0	27	0	0	0	56	0
318038c5167ebd8594f48ae3dc3051a0_rep;size=2578;	x__sub0.01	x__sub0.01	x__sub0.01	x__sub0.01	x__sub0.01	x__sub0.01	x__sub0.01	44	0	0	0	52	0	0	0	86	0	0	0	63	0	0	0	58	0	0	0	61	0	0	0	23	0	1	0	59	0	0	0	52	0	0	0	73	0	0	0	48	0
07363e0c8096efe343beefeae847b5e5_rep;size=2548;	x__sub0.01	x__sub0.01	x__sub0.01	x__sub0.01	x__sub0.01	x__sub0.01	x__sub0.01	38	0	1	0	29	0	1	0	38	1	0	0	71	0	0	0	48	0	0	0	46	0	0	0	28	0	0	0	20	0	0	0	33	0	0	0	23	0	0	0	14	0
8b1aa83ae36009c2cb6ca972b3bc7c9a_rep;size=2535;	x__sub0.01	x__sub0.01	x__sub0.01	x__sub0.01	x__sub0.01	x__sub0.01	x__sub0.01	11	4	0	1	11	5	0	1	13	4	1	2	23	3	5	3	55	2	2	2	31	6	10	4	10	0	1	2	15	1	0	0	13	1	0	0	26	1	0	0	31	0
db911197ead0d1713de98b6461d87cbc_rep;size=2529;	k__Fungi	p__Ascomycota	c__Eurotiomycetes	o__Eurotiales	f__Aspergillaceae	g__Penicillium	s__Penicillium_expansum	0	0	0	0	0	0	0	0	1	0	0	0	0	0	0	0	0	0	0	0	1	0	0	0	0	0	0	0	0	0	0	0	0	0	0	0	2	0	0	0	0	0
5618370ff4bad9379435d6887bcccaa2_rep;size=2467;	x__sub0.01	x__sub0.01	x__sub0.01	x__sub0.01	x__sub0.01	x__sub0.01	x__sub0.01	4	0	0	0	6	0	0	0	20	0	0	0	7	0	0	0	5	0	0	0	12	0	0	0	3	0	0	0	14	0	0	0	7	0	0	0	14	0	0	0	10	0
882166b120532df0206ba1d87ee274f8_rep;size=2420;	x__sub0.01	x__sub0.01	x__sub0.01	x__sub0.01	x__sub0.01	x__sub0.01	x__sub0.01	34	0	0	0	35	0	0	0	59	0	0	0	22	0	0	0	28	0	0	0	37	0	0	0	24	0	0	0	61	0	0	0	34	0	0	0	45	0	0	0	42	0
777fc98a74dbacd53dee07ad8e050fd1_rep;size=2414;	k__Fungi	p__Ascomycota	c__Sordariomycetes	o__Diaporthales	f__Diaporthaceae	g__Diaporthe	s__Diaporthe_ampelina	0	0	0	0	0	0	0	0	0	0	0	0	0	0	0	0	0	0	0	0	0	0	0	0	0	0	0	0	0	0	0	0	0	0	0	0	0	0	0	0	0	0
83744b96f1876c30efc75ba5c26d0df5_rep;size=2397;	x__sub0.01	x__sub0.01	x__sub0.01	x__sub0.01	x__sub0.01	x__sub0.01	x__sub0.01	5	0	0	0	3	0	0	0	5	0	0	0	0	0	0	0	7	0	0	0	3	0	0	0	4	0	0	0	2	0	0	0	12	0	0	0	14	0	0	0	10	0
6c963c545e3de9cd74adde6ff34c5308_rep;size=2389;	x__sub0.01	x__sub0.01	x__sub0.01	x__sub0.01	x__sub0.01	x__sub0.01	x__sub0.01	0	3	9	3	0	3	9	8	0	0	3	9	2	4	1	1	0	3	3	6	0	0	4	3	0	2	6	5	4	2	3	8	0	0	8	7	5	3	3	8	1	1
628923f35d586dcd7a14ac94864d9dfc_rep;size=2375;	x__sub0.01	x__sub0.01	x__sub0.01	x__sub0.01	x__sub0.01	x__sub0.01	x__sub0.01	6	0	0	0	1	0	0	0	0	0	0	1	5	0	0	0	18	0	0	0	34	0	0	0	2	0	0	0	35	0	0	0	0	0	0	0	6	0	0	0	7	0
ba9a7a98b8a2337e2b7f88a4cb40c03e_rep;size=2350;	x__sub0.01	x__sub0.01	x__sub0.01	x__sub0.01	x__sub0.01	x__sub0.01	x__sub0.01	1	0	0	0	0	0	0	0	0	0	0	0	3	1	0	0	2	0	0	0	0	0	0	0	0	0	0	0	1	0	0	0	1	0	0	0	7	0	0	0	3	0
6a6880de64d5ee6882221e6d161b26d1_rep;size=2322;	x__sub0.01	x__sub0.01	x__sub0.01	x__sub0.01	x__sub0.01	x__sub0.01	x__sub0.01	0	6	10	18	0	6	8	18	0	2	2	32	0	0	6	8	0	2	4	14	0	2	7	12	0	3	7	29	0	1	7	27	0	2	7	17	0	1	11	47	0	2
3cf343b1c9c91ad17159e68827f9f512_rep;size=2304;	x__sub0.01	x__sub0.01	x__sub0.01	x__sub0.01	x__sub0.01	x__sub0.01	x__sub0.01	10	11	9	6	11	12	11	7	16	7	3	8	15	18	13	4	28	5	8	4	19	3	8	14	7	18	20	32	8	15	10	22	22	14	18	23	25	9	6	11	17	23
7d3308e8041357feeb658015cea40f0b_rep;size=2285;	x__sub0.01	x__sub0.01	x__sub0.01	x__sub0.01	x__sub0.01	x__sub0.01	x__sub0.01	0	23	24	14	0	35	13	10	0	12	7	20	0	29	40	39	0	9	15	34	0	14	26	26	0	51	99	245	1	35	19	121	0	48	56	90	1	14	72	210	0	12
626f5ed6f993d649f61972eb71c836c5_rep;size=2267;	x__sub0.01	x__sub0.01	x__sub0.01	x__sub0.01	x__sub0.01	x__sub0.01	x__sub0.01	0	47	40	39	0	23	47	34	0	21	26	42	1	11	43	29	0	9	34	43	0	7	23	56	0	10	46	102	0	7	26	67	0	11	34	65	0	5	19	78	0	14
18be5197107d69fca4a230b37871e079_rep;size=2250;	x__sub0.01	x__sub0.01	x__sub0.01	x__sub0.01	x__sub0.01	x__sub0.01	x__sub0.01	0	4	1	0	0	0	0	2	0	0	4	4	0	0	0	1	0	0	2	3	0	0	0	0	0	1	4	4	0	0	0	4	0	1	2	0	1	0	3	1	0	0
ef488524b6bf5075f2397fd6f7cc9d96_rep;size=2249;	x__sub0.01	x__sub0.01	x__sub0.01	x__sub0.01	x__sub0.01	x__sub0.01	x__sub0.01	33	0	0	0	38	0	0	0	92	0	0	0	141	0	0	0	325	0	0	0	48	0	0	0	20	0	0	0	49	0	0	0	59	0	0	0	56	0	0	0	41	0
5175c4cca84fbca00ad9f222de0fb747_rep;size=2219;	x__sub0.01	x__sub0.01	x__sub0.01	x__sub0.01	x__sub0.01	x__sub0.01	x__sub0.01	35	0	0	0	38	0	1	0	45	0	0	0	32	0	0	0	44	0	0	0	49	0	0	0	15	0	0	0	54	0	0	0	31	0	0	0	42	0	0	0	37	0
6a88a225744852af8a607ac92d7e14c7_rep;size=2129;	x__sub0.01	x__sub0.01	x__sub0.01	x__sub0.01	x__sub0.01	x__sub0.01	x__sub0.01	32	0	0	0	30	0	0	0	44	0	0	0	23	0	0	0	33	0	0	0	37	0	0	0	12	0	0	0	29	0	0	0	13	0	0	0	51	0	0	0	29	0
e150c7820b67b6f3d3f761bad51ad2a7_rep;size=2106;	x__sub0.01	x__sub0.01	x__sub0.01	x__sub0.01	x__sub0.01	x__sub0.01	x__sub0.01	0	3	3	2	0	2	3	1	0	1	3	1	0	0	0	1	0	0	1	1	0	0	0	4	0	1	1	3	0	1	1	7	0	2	0	1	0	1	2	3	0	1
d962537cdc24677fc81c7d74a0e9003a_rep;size=2103;	x__sub0.01	x__sub0.01	x__sub0.01	x__sub0.01	x__sub0.01	x__sub0.01	x__sub0.01	13	0	0	0	11	0	0	0	4	0	0	0	22	0	0	0	6	0	0	0	12	0	0	0	4	0	0	0	14	0	0	0	8	0	0	0	8	0	0	0	16	0
580bb61457f66630f85b6f0a9ad4bd66_rep;size=2095;	x__sub0.01	x__sub0.01	x__sub0.01	x__sub0.01	x__sub0.01	x__sub0.01	x__sub0.01	0	0	0	0	0	0	0	0	0	0	0	0	0	0	0	0	0	0	0	0	0	0	0	0	0	0	0	0	0	0	0	0	0	0	0	0	0	0	0	0	0	0
96c9bd5241f50eed8d135ae7f07c7652_rep;size=2091;	x__sub0.01	x__sub0.01	x__sub0.01	x__sub0.01	x__sub0.01	x__sub0.01	x__sub0.01	33	1	0	0	61	0	0	0	48	0	0	0	25	0	0	0	57	0	0	0	64	0	0	0	44	0	0	0	54	0	0	0	23	0	0	0	29	0	0	0	30	0
cb5f81f0a994428dcfafd9c5780302cc_rep;size=2009;	x__sub0.01	x__sub0.01	x__sub0.01	x__sub0.01	x__sub0.01	x__sub0.01	x__sub0.01	22	0	0	0	14	0	0	0	35	0	0	1	18	0	0	0	19	0	0	0	28	0	0	0	7	0	0	0	16	0	0	0	16	0	0	0	8	0	0	0	18	0
10ff941ee2bb93010a36e5e11e7d7dfe_rep;size=2005;	x__sub0.01	x__sub0.01	x__sub0.01	x__sub0.01	x__sub0.01	x__sub0.01	x__sub0.01	2	1	4	5	0	3	7	7	0	6	3	6	0	7	1	1	1	3	7	6	5	1	6	3	0	2	0	7	1	4	3	8	0	2	12	5	2	2	3	7	1	2
0bada25ffbe83c15e73d0e344a1cf555_rep;size=1920;	x__sub0.01	x__sub0.01	x__sub0.01	x__sub0.01	x__sub0.01	x__sub0.01	x__sub0.01	0	1	1	0	0	2	2	1	0	2	0	3	0	0	0	0	0	0	0	1	0	0	2	2	0	0	1	1	0	0	0	2	0	0	1	1	0	0	1	1	0	0
3c421f3389f3f1534288249c7f97c07b_rep;size=1900;	x__sub0.01	x__sub0.01	x__sub0.01	x__sub0.01	x__sub0.01	x__sub0.01	x__sub0.01	3	0	0	0	3	0	0	0	3	0	0	0	2	0	0	0	5	0	0	0	1	0	0	0	4	0	0	0	6	0	0	0	3	0	0	0	1	0	0	0	0	0
39564c0cad9b31719ea2c26380d20b54_rep;size=1897;	x__sub0.01	x__sub0.01	x__sub0.01	x__sub0.01	x__sub0.01	x__sub0.01	x__sub0.01	61	0	0	0	45	0	0	0	48	0	0	0	47	0	0	0	61	0	1	0	72	0	0	0	31	0	0	0	78	0	1	0	37	1	0	0	74	0	0	1	69	0
411201d6a347bdf548aa3bd4002f0208_rep;size=1861;	x__sub0.01	x__sub0.01	x__sub0.01	x__sub0.01	x__sub0.01	x__sub0.01	x__sub0.01	0	1	3	0	0	1	1	1	0	0	0	0	0	0	0	2	0	0	1	0	0	0	1	0	0	0	0	3	0	0	0	5	0	0	1	2	0	0	0	2	0	1
b65effa909f77d6dbcb4180f89fb6aa1_rep;size=1854;	x__sub0.01	x__sub0.01	x__sub0.01	x__sub0.01	x__sub0.01	x__sub0.01	x__sub0.01	33	1	1	0	46	0	1	0	68	0	0	0	50	0	0	0	45	0	0	0	57	0	0	0	22	0	0	1	26	0	0	0	33	0	0	0	46	0	0	0	26	0
c0622106b9b6e1d69739ec9fb5d5aed8_rep;size=1848;	x__sub0.01	x__sub0.01	x__sub0.01	x__sub0.01	x__sub0.01	x__sub0.01	x__sub0.01	23	0	0	0	29	0	0	0	48	0	0	0	27	0	0	0	24	0	0	0	24	0	0	0	13	0	0	0	23	0	0	0	15	0	0	0	48	0	0	0	22	0
8f39490cec2656a8b8511edb93cbc681_rep;size=1797;	k__Fungi	p__Ascomycota	c__Saccharomycetes	o__Saccharomycetales	f__Saccharomycetaceae	g__Saccharomyces	g__Saccharomyces	0	0	0	0	0	0	0	0	0	0	0	0	0	0	0	0	0	0	0	0	0	0	0	1	0	0	0	0	0	0	0	0	0	0	0	0	0	0	0	0	0	0
6ba045e8e73f58d212c88aeab60de750_rep;size=1756;	x__sub0.01	x__sub0.01	x__sub0.01	x__sub0.01	x__sub0.01	x__sub0.01	x__sub0.01	17	0	0	0	29	0	0	0	29	0	0	0	19	0	0	0	30	0	0	0	38	0	0	0	19	0	0	0	23	0	0	0	10	0	0	0	52	0	0	0	38	0
8c140881c62c3645fdc134c8593454bf_rep;size=1740;	k__Fungi	p__Ascomycota	c__Saccharomycetes	o__Saccharomycetales	f__Saccharomycetaceae	g__Saccharomyces	s__Saccharomyces_cerevisiae	0	0	0	0	0	0	0	0	0	0	0	0	0	0	0	0	0	0	0	0	0	0	0	0	0	0	0	0	0	0	0	0	0	0	0	2	0	0	0	0	0	0
9f8f0a623b43c850fd749b18796bc93e_rep;size=1723;	x__sub0.01	x__sub0.01	x__sub0.01	x__sub0.01	x__sub0.01	x__sub0.01	x__sub0.01	2	7	15	4	4	6	11	6	6	7	6	5	1	18	29	35	1	3	12	24	1	3	15	18	0	26	38	106	2	10	16	24	5	13	23	34	6	4	17	42	1	7
6a6af6f14916fcc1bf2a7495f706301c_rep;size=1722;	x__sub0.01	x__sub0.01	x__sub0.01	x__sub0.01	x__sub0.01	x__sub0.01	x__sub0.01	72	0	0	1	4	3	0	1	44	0	0	0	138	0	1	0	87	0	1	1	178	0	0	3	42	0	0	1	110	0	0	0	69	0	2	0	203	2	2	0	148	0
540b5d9ed8c7ad3c7d8c50abc7446d08_rep;size=1712;	x__sub0.01	x__sub0.01	x__sub0.01	x__sub0.01	x__sub0.01	x__sub0.01	x__sub0.01	40	4	14	5	4	3	4	3	34	9	7	8	27	4	10	11	34	1	5	9	1	6	16	12	41	1	3	7	60	4	0	0	88	0	2	1	68	8	2	7	116	4
0545a48de87a3a95a581a8b0120ef823_rep;size=1710;	x__sub0.01	x__sub0.01	x__sub0.01	x__sub0.01	x__sub0.01	x__sub0.01	x__sub0.01	7	0	0	0	16	0	0	0	14	0	1	0	27	0	0	0	6	0	0	0	7	0	0	0	7	0	0	0	19	0	0	0	10	0	0	0	6	0	0	0	8	0
e2a32cfddf4a9ddf95f53905b0759a33_rep;size=1667;	x__sub0.01	x__sub0.01	x__sub0.01	x__sub0.01	x__sub0.01	x__sub0.01	x__sub0.01	30	0	1	0	28	0	0	0	42	0	0	0	43	0	1	0	23	0	0	0	46	0	1	0	27	0	0	0	24	1	2	0	25	0	0	0	46	0	0	1	53	0
3530596006110524cb3ad1148f5d890d_rep;size=1639;	x__sub0.01	x__sub0.01	x__sub0.01	x__sub0.01	x__sub0.01	x__sub0.01	x__sub0.01	38	1	1	0	35	0	0	1	48	0	0	0	25	0	0	0	31	0	0	0	53	1	1	1	31	1	0	0	54	1	0	0	37	0	0	0	79	1	0	0	48	1
a4b4f0f40e4b050857664a3eba69e27a_rep;size=1639;	x__sub0.01	x__sub0.01	x__sub0.01	x__sub0.01	x__sub0.01	x__sub0.01	x__sub0.01	11	0	1	0	19	0	0	1	23	0	0	0	51	0	0	3	31	0	0	2	32	0	0	0	12	0	0	1	10	0	0	0	12	0	0	0	46	0	0	0	27	0
ffb37b5e445fbe3c0e9bf641e9f7b4e7_rep;size=1613;	x__sub0.01	x__sub0.01	x__sub0.01	x__sub0.01	x__sub0.01	x__sub0.01	x__sub0.01	0	4	3	3	0	3	8	6	1	2	2	3	0	1	2	2	0	0	1	8	0	1	2	4	1	1	4	6	0	6	1	4	0	3	4	2	1	0	1	10	0	2
896eff3b160b6b1202b58d6d367d010d_rep;size=1607;	x__sub0.01	x__sub0.01	x__sub0.01	x__sub0.01	x__sub0.01	x__sub0.01	x__sub0.01	0	9	8	2	4	3	2	7	1	0	2	7	1	2	5	3	2	1	0	3	0	3	2	7	1	2	7	7	1	0	2	4	0	5	8	9	3	1	3	6	1	2
170668c2808ab818cc4790ce5929e55c_rep;size=1583;	x__sub0.01	x__sub0.01	x__sub0.01	x__sub0.01	x__sub0.01	x__sub0.01	x__sub0.01	1	4	5	2	3	3	5	5	1	2	1	5	0	1	2	1	0	4	5	5	0	1	4	0	2	1	3	7	0	3	2	8	0	1	0	1	0	0	4	3	1	2
d466b5066ce9e1ff4c66d28442fe5153_rep;size=1580;	x__sub0.01	x__sub0.01	x__sub0.01	x__sub0.01	x__sub0.01	x__sub0.01	x__sub0.01	0	1	0	0	0	0	1	2	0	0	1	1	0	0	0	1	0	0	2	1	0	2	0	1	0	0	0	0	0	0	0	2	0	0	1	2	0	2	1	0	0	1
89a0ccec8724b2f8e7497b876f095b16_rep;size=1575;	x__sub0.01	x__sub0.01	x__sub0.01	x__sub0.01	x__sub0.01	x__sub0.01	x__sub0.01	0	4	4	4	0	5	5	3	0	3	2	6	1	1	1	0	0	1	0	2	0	3	4	8	0	2	2	3	0	1	0	9	0	1	2	9	0	2	1	5	0	0
d28acc8444647825a8fcf0f15191a59b_rep;size=1571;	x__sub0.01	x__sub0.01	x__sub0.01	x__sub0.01	x__sub0.01	x__sub0.01	x__sub0.01	0	0	0	0	0	0	0	0	0	0	0	0	0	0	0	0	0	0	0	0	7	0	0	0	9	0	0	0	1	0	0	0	3	0	0	0	0	0	0	0	3	0
cc81672b7e2a26d1eedd7d62f5668c6d_rep;size=1563;	x__sub0.01	x__sub0.01	x__sub0.01	x__sub0.01	x__sub0.01	x__sub0.01	x__sub0.01	2	0	0	0	0	0	0	0	13	0	0	0	7	0	0	0	36	0	0	0	42	0	0	0	78	0	0	0	1	0	0	0	1	0	0	0	7	0	0	0	1	1
be047f80b776932ae20eb999ee39b9e5_rep;size=1563;	x__sub0.01	x__sub0.01	x__sub0.01	x__sub0.01	x__sub0.01	x__sub0.01	x__sub0.01	22	0	0	0	28	0	0	0	47	0	0	0	22	0	1	0	41	0	0	0	24	0	0	0	9	0	0	0	17	0	0	0	9	0	0	0	24	0	0	0	4	0
2d3c8ab7e937eddf4d458c8647f1b902_rep;size=1551;	x__sub0.01	x__sub0.01	x__sub0.01	x__sub0.01	x__sub0.01	x__sub0.01	x__sub0.01	24	0	0	0	29	0	0	0	43	0	0	0	17	0	0	0	35	0	0	0	5	0	0	0	8	0	0	0	10	0	0	0	11	0	0	0	17	0	0	0	11	0
c8ec1426c7aa4634414c7781271c496f_rep;size=1523;	x__sub0.01	x__sub0.01	x__sub0.01	x__sub0.01	x__sub0.01	x__sub0.01	x__sub0.01	16	0	0	0	11	0	0	0	20	0	0	0	8	0	1	0	15	0	0	0	13	0	0	0	4	0	0	0	2	0	0	0	30	0	0	0	0	0	0	0	11	0
7d08a04b116d6ce2db548390340e4489_rep;size=1515;	x__sub0.01	x__sub0.01	x__sub0.01	x__sub0.01	x__sub0.01	x__sub0.01	x__sub0.01	13	3	3	0	17	4	1	0	36	2	2	1	7	4	2	2	13	3	4	3	13	3	3	2	3	0	0	2	17	2	0	1	7	0	0	0	22	0	2	0	43	2
7877d180fb43796b15d1f128131a8cf6_rep;size=1470;	x__sub0.01	x__sub0.01	x__sub0.01	x__sub0.01	x__sub0.01	x__sub0.01	x__sub0.01	0	2	1	0	0	1	1	2	0	0	1	3	0	0	0	0	0	0	1	0	1	0	2	2	0	2	0	4	0	0	1	4	0	0	2	1	0	0	2	2	0	1
62a435349f035c2a48a4ace2ca284f7f_rep;size=1468;	x__sub0.01	x__sub0.01	x__sub0.01	x__sub0.01	x__sub0.01	x__sub0.01	x__sub0.01	0	0	1	0	0	1	0	1	0	0	0	2	0	0	1	1	0	0	0	1	0	1	1	1	0	0	0	0	0	0	0	2	0	0	1	1	0	1	1	0	0	0
160701c79973b1057ef72873c053e989_rep;size=1440;	x__sub0.01	x__sub0.01	x__sub0.01	x__sub0.01	x__sub0.01	x__sub0.01	x__sub0.01	39	0	0	0	30	1	0	0	25	0	0	0	43	0	0	0	34	0	0	1	53	0	0	0	19	1	1	0	41	0	0	0	26	0	0	0	42	0	0	0	38	1
19ded7f847c122f8accc15292e2a4115_rep;size=1439;	x__sub0.01	x__sub0.01	x__sub0.01	x__sub0.01	x__sub0.01	x__sub0.01	x__sub0.01	23	0	0	0	34	0	1	0	37	0	0	0	36	0	0	0	28	0	0	1	37	0	0	0	23	0	0	0	20	0	0	0	29	0	0	0	33	1	0	0	46	0
1a6fc15d82017d504e0b5fe642db4a2a_rep;size=1436;	x__sub0.01	x__sub0.01	x__sub0.01	x__sub0.01	x__sub0.01	x__sub0.01	x__sub0.01	3	0	0	0	2	0	0	0	6	0	0	0	5	0	0	0	0	0	0	0	5	0	1	0	2	0	0	0	8	0	0	0	0	0	0	0	7	0	0	0	1	0
e2e64777ce1e4bd18a43b429adb7b3a9_rep;size=1426;	x__sub0.01	x__sub0.01	x__sub0.01	x__sub0.01	x__sub0.01	x__sub0.01	x__sub0.01	73	0	0	0	24	0	0	0	7	0	0	0	120	0	0	0	42	0	0	0	0	0	0	0	15	0	0	0	0	0	0	0	0	0	0	0	7	0	0	0	6	0
aaf3c0d8f8956b7dd9c289a5b3978e0a_rep;size=1414;	x__sub0.01	x__sub0.01	x__sub0.01	x__sub0.01	x__sub0.01	x__sub0.01	x__sub0.01	14	10	15	12	54	10	6	5	36	8	6	8	62	15	21	24	67	14	8	22	58	13	7	13	14	5	6	14	35	4	3	0	17	0	4	4	129	10	4	19	49	1
860590dce79d512fe0a61ba34aa5a2ad_rep;size=1372;	x__sub0.01	x__sub0.01	x__sub0.01	x__sub0.01	x__sub0.01	x__sub0.01	x__sub0.01	13	0	0	0	29	0	0	0	9	0	0	0	15	0	0	0	24	0	0	0	20	0	0	0	28	0	0	0	37	0	0	0	16	0	0	0	44	0	0	0	6	0
a3367d181930fa399609c3f2ae98bea6_rep;size=1364;	x__sub0.01	x__sub0.01	x__sub0.01	x__sub0.01	x__sub0.01	x__sub0.01	x__sub0.01	40	0	0	0	31	1	0	1	45	0	0	0	38	0	0	1	47	0	0	0	50	0	0	0	24	0	0	0	37	0	0	0	22	0	0	0	29	0	0	1	48	0
9341514b83a06d8d919a57e683e4551c_rep;size=1333;	x__sub0.01	x__sub0.01	x__sub0.01	x__sub0.01	x__sub0.01	x__sub0.01	x__sub0.01	4	1	13	6	3	2	9	4	1	4	2	4	6	3	3	5	4	2	2	4	5	1	3	1	4	1	2	5	3	1	0	1	4	1	1	3	5	1	4	10	2	2
959b8de72575e132a95b7ead675092bd_rep;size=1325;	x__sub0.01	x__sub0.01	x__sub0.01	x__sub0.01	x__sub0.01	x__sub0.01	x__sub0.01	0	2	1	2	0	2	2	1	0	0	0	0	0	0	0	1	0	0	1	0	0	0	0	1	0	0	0	2	0	1	1	4	0	0	0	0	0	1	0	2	0	0
713bb5122f3876af15e29493a7ad7063_rep;size=1323;	x__sub0.01	x__sub0.01	x__sub0.01	x__sub0.01	x__sub0.01	x__sub0.01	x__sub0.01	2	3	5	3	2	1	2	13	0	2	4	6	0	2	3	2	0	0	1	2	1	5	3	5	0	2	2	13	1	1	2	6	0	2	4	2	6	5	1	8	3	2
443b27244c3220c7cad6a1c1651ff65f_rep;size=1317;	x__sub0.01	x__sub0.01	x__sub0.01	x__sub0.01	x__sub0.01	x__sub0.01	x__sub0.01	3	0	0	0	6	0	0	0	3	0	0	0	7	1	0	0	4	0	0	0	7	0	0	0	4	0	0	0	1	0	0	0	3	0	0	0	2	0	0	0	4	0
7a9df6311bbf588073231da2b1827bc7_rep;size=1316;	x__sub0.01	x__sub0.01	x__sub0.01	x__sub0.01	x__sub0.01	x__sub0.01	x__sub0.01	2	4	8	8	0	2	8	7	1	5	6	11	6	4	7	11	2	4	5	9	2	1	2	7	2	2	8	15	3	3	5	3	0	3	5	9	4	3	5	11	0	3
59690eb52c310775049a1a202f36ba7d_rep;size=1295;	x__sub0.01	x__sub0.01	x__sub0.01	x__sub0.01	x__sub0.01	x__sub0.01	x__sub0.01	0	3	1	1	0	2	0	2	2	2	3	3	2	1	2	2	0	2	3	4	0	1	4	6	0	0	3	4	0	0	5	3	1	3	4	6	1	0	0	1	0	4
fa78edc31dbcf3ac7ce77248bcbf79b4_rep;size=1295;	x__sub0.01	x__sub0.01	x__sub0.01	x__sub0.01	x__sub0.01	x__sub0.01	x__sub0.01	0	5	8	9	0	3	1	17	0	0	1	21	0	5	9	11	0	0	3	9	0	0	5	6	0	2	15	60	0	0	1	15	0	0	2	20	0	0	7	51	0	1
11b01d95ce5c50e03eaa45f5eea936d6_rep;size=1290;	x__sub0.01	x__sub0.01	x__sub0.01	x__sub0.01	x__sub0.01	x__sub0.01	x__sub0.01	0	3	1	0	3	4	1	1	8	2	0	0	3	1	1	2	5	2	1	3	4	4	5	8	5	0	2	3	3	1	0	0	1	2	6	1	11	0	3	5	3	2
6dae6299db8264fcaa81e3e0d65cdaae_rep;size=1283;	x__sub0.01	x__sub0.01	x__sub0.01	x__sub0.01	x__sub0.01	x__sub0.01	x__sub0.01	36	0	0	0	28	0	0	0	14	0	0	0	89	0	0	0	25	0	0	0	6	0	0	0	10	0	0	0	45	0	1	0	25	0	0	0	13	0	0	0	18	0
fc2110ebb337ad5fe1db0178cba9e889_rep;size=1263;	x__sub0.01	x__sub0.01	x__sub0.01	x__sub0.01	x__sub0.01	x__sub0.01	x__sub0.01	53	9	13	9	51	6	6	10	40	5	8	9	28	12	14	22	52	4	6	24	58	6	8	13	13	3	1	8	26	3	0	0	35	2	0	4	143	4	4	12	36	0
9bdabf9909cd5ae013388f1d913594ce_rep;size=1241;	x__sub0.01	x__sub0.01	x__sub0.01	x__sub0.01	x__sub0.01	x__sub0.01	x__sub0.01	16	0	1	0	13	0	0	0	31	0	1	0	32	0	0	0	25	0	0	0	24	0	0	0	16	0	0	0	28	0	0	0	15	0	0	0	25	0	0	0	13	0
da956e277ea158e1b59e0cfc6b651c3f_rep;size=1216;	x__sub0.01	x__sub0.01	x__sub0.01	x__sub0.01	x__sub0.01	x__sub0.01	x__sub0.01	6	0	0	0	1	0	0	0	5	0	0	0	1	0	0	0	5	0	0	0	2	0	0	0	1	0	0	0	4	0	0	0	6	0	0	0	11	0	0	0	9	0
f3528e6cdefb43fc733b36661478c181_rep;size=1210;	x__sub0.01	x__sub0.01	x__sub0.01	x__sub0.01	x__sub0.01	x__sub0.01	x__sub0.01	19	0	0	0	18	0	0	0	21	0	0	0	31	0	0	0	30	0	0	0	24	0	0	0	14	0	0	0	25	0	0	0	14	0	0	0	27	0	0	0	27	0
8890eeb3a7711c2d84e049eddc0d643c_rep;size=1207;	x__sub0.01	x__sub0.01	x__sub0.01	x__sub0.01	x__sub0.01	x__sub0.01	x__sub0.01	1	3	3	3	0	3	3	4	0	1	3	6	0	1	0	3	0	0	2	2	0	1	4	0	1	2	1	5	0	2	0	5	1	4	1	2	1	1	0	5	0	0
bd06ae2a4b9708345adcc48d6eb53a7d_rep;size=1202;	x__sub0.01	x__sub0.01	x__sub0.01	x__sub0.01	x__sub0.01	x__sub0.01	x__sub0.01	3	0	0	0	0	0	0	0	0	0	0	0	0	0	0	0	2	0	0	0	4	0	0	0	0	0	0	0	0	0	0	0	0	0	0	0	1	0	0	0	0	0
a8d4ed0456689a524a8561eadc3f379a_rep;size=1199;	x__sub0.01	x__sub0.01	x__sub0.01	x__sub0.01	x__sub0.01	x__sub0.01	x__sub0.01	2	4	7	7	1	5	8	0	0	2	3	6	0	4	0	3	0	0	3	3	4	3	5	4	0	0	5	2	3	0	1	6	1	4	3	6	1	2	2	6	0	2
8c02d13baffd53da1cd03d6d18b465af_rep;size=1164;	x__sub0.01	x__sub0.01	x__sub0.01	x__sub0.01	x__sub0.01	x__sub0.01	x__sub0.01	0	1	0	0	0	0	2	1	0	0	1	0	0	0	0	1	0	0	1	0	0	0	0	1	0	0	0	0	0	0	0	1	0	0	1	1	0	0	1	1	0	0
4d8b220eb39230234dcb6b9d284fa0b9_rep;size=1151;	x__sub0.01	x__sub0.01	x__sub0.01	x__sub0.01	x__sub0.01	x__sub0.01	x__sub0.01	2	6	7	4	2	2	3	4	0	3	2	9	0	6	9	11	0	5	3	3	1	4	3	9	1	19	34	58	0	10	9	45	0	11	11	19	2	2	24	83	1	6
67d1657e11888a0b563adc0b98914a90_rep;size=1126;	x__sub0.01	x__sub0.01	x__sub0.01	x__sub0.01	x__sub0.01	x__sub0.01	x__sub0.01	0	2	7	2	1	1	5	3	0	2	0	7	0	0	2	0	0	1	0	2	2	0	0	0	2	2	2	7	0	0	3	6	0	1	2	9	2	1	1	1	2	5
389b56d1738d6b7f238a9810e7a4b889_rep;size=1100;	x__sub0.01	x__sub0.01	x__sub0.01	x__sub0.01	x__sub0.01	x__sub0.01	x__sub0.01	0	2	3	4	2	1	3	4	8	3	3	8	0	1	1	7	2	1	1	3	1	1	3	2	2	2	1	4	3	0	1	1	4	0	1	2	4	4	2	2	3	2
4331b1c9fca1022465fa0e570dd8a315_rep;size=1096;	x__sub0.01	x__sub0.01	x__sub0.01	x__sub0.01	x__sub0.01	x__sub0.01	x__sub0.01	0	0	0	0	0	0	0	0	0	0	0	0	0	0	0	0	0	0	0	0	0	0	0	0	0	0	0	0	0	0	0	0	0	0	0	0	0	0	0	0	0	0
0909efc3cd7237eb4224d137b586f009_rep;size=1094;	x__sub0.01	x__sub0.01	x__sub0.01	x__sub0.01	x__sub0.01	x__sub0.01	x__sub0.01	10	1	0	0	17	0	0	0	12	0	0	0	2	0	0	0	15	0	0	0	12	0	0	0	9	0	0	0	9	0	0	0	3	0	0	0	13	0	0	0	14	0
d967500a79ab81e05395e583ecc833a3_rep;size=1082;	x__sub0.01	x__sub0.01	x__sub0.01	x__sub0.01	x__sub0.01	x__sub0.01	x__sub0.01	17	0	1	0	19	0	0	0	42	0	0	0	34	0	0	0	22	0	0	0	44	0	0	0	16	0	0	0	32	0	0	0	17	0	0	0	23	0	0	0	19	0
3ef3064b046715f1ab371f5a033c8d32_rep;size=1055;	x__sub0.01	x__sub0.01	x__sub0.01	x__sub0.01	x__sub0.01	x__sub0.01	x__sub0.01	0	1	2	0	0	1	1	2	0	0	0	0	0	0	1	0	0	0	0	1	0	0	0	0	0	1	0	2	0	0	0	1	0	0	2	1	0	0	0	4	0	0
b11b7b95b6692259e8ea9b5dcff05b3b_rep;size=1054;	x__sub0.01	x__sub0.01	x__sub0.01	x__sub0.01	x__sub0.01	x__sub0.01	x__sub0.01	34	0	0	0	24	0	0	0	13	0	0	0	18	0	0	0	15	0	0	0	35	0	0	0	14	0	0	0	16	0	0	0	16	0	0	0	20	0	0	0	38	0
e95c769feedc6157419875d7df729788_rep;size=1045;	x__sub0.01	x__sub0.01	x__sub0.01	x__sub0.01	x__sub0.01	x__sub0.01	x__sub0.01	10	0	0	0	25	0	0	0	28	0	0	0	19	0	0	0	14	0	0	1	25	0	0	0	12	0	0	0	10	0	0	0	14	0	0	0	25	0	0	0	21	0
fb4340d1c9fa43ede9a49a9ecfac52ef_rep;size=1020;	x__sub0.01	x__sub0.01	x__sub0.01	x__sub0.01	x__sub0.01	x__sub0.01	x__sub0.01	18	0	0	0	20	0	0	1	13	0	0	0	15	0	0	0	11	0	0	0	21	0	0	0	26	1	0	0	25	0	0	0	11	0	0	0	17	0	0	0	23	0
2ebdceb2df1d8483758ac9959ec800a1_rep;size=1020;	x__sub0.01	x__sub0.01	x__sub0.01	x__sub0.01	x__sub0.01	x__sub0.01	x__sub0.01	1	8	10	6	0	19	4	4	0	6	3	5	0	12	15	20	0	3	8	7	0	5	11	11	0	18	57	120	0	25	14	40	0	26	26	22	0	4	39	107	1	15
d90453a25138db68b07587cb2b2e3921_rep;size=1017;	x__sub0.01	x__sub0.01	x__sub0.01	x__sub0.01	x__sub0.01	x__sub0.01	x__sub0.01	0	2	0	1	0	1	1	0	0	0	0	1	0	0	0	0	0	0	0	2	0	0	0	1	0	0	1	1	0	0	0	0	0	0	0	0	0	0	0	1	0	0
279fa4a10cc71a8e43c56f920f11043f_rep;size=1015;	x__sub0.01	x__sub0.01	x__sub0.01	x__sub0.01	x__sub0.01	x__sub0.01	x__sub0.01	0	0	0	0	0	0	0	0	0	0	0	0	0	0	0	0	0	0	0	0	0	0	0	0	0	0	0	0	0	0	0	0	0	0	0	0	0	0	0	0	0	0
f27057c8f3c0f13007b0a5d2ad537549_rep;size=1009;	x__sub0.01	x__sub0.01	x__sub0.01	x__sub0.01	x__sub0.01	x__sub0.01	x__sub0.01	11	1	0	0	29	0	0	0	37	0	0	0	16	0	0	0	14	0	0	0	22	0	0	0	7	0	0	0	13	0	0	0	11	0	1	0	22	0	0	0	29	0
04b4d30d3feabe520078cd09b8ced96e_rep;size=1009;	x__sub0.01	x__sub0.01	x__sub0.01	x__sub0.01	x__sub0.01	x__sub0.01	x__sub0.01	0	1	1	2	0	0	0	1	0	0	2	2	0	0	1	0	0	0	0	0	0	0	0	2	0	0	0	0	0	0	0	1	1	0	0	0	0	0	0	0	0	0
d9b8dd966cb68d0c5f09ed87934a285c_rep;size=1001;	x__sub0.01	x__sub0.01	x__sub0.01	x__sub0.01	x__sub0.01	x__sub0.01	x__sub0.01	20	0	0	0	30	0	0	0	31	0	0	0	34	0	0	0	31	0	0	0	26	0	1	0	15	0	0	0	15	0	0	0	23	0	0	0	24	0	0	0	26	0
267ae2e9c7d5a1b8664a128b529017d5_rep;size=999;	x__sub0.01	x__sub0.01	x__sub0.01	x__sub0.01	x__sub0.01	x__sub0.01	x__sub0.01	0	0	0	0	1	0	0	0	2	0	0	0	0	0	0	0	1	0	0	0	3	0	0	0	0	0	0	0	0	0	0	0	1	0	0	0	2	0	0	0	2	0
ae5979c16b8ebc366953d1102d9b75b5_rep;size=996;	x__sub0.01	x__sub0.01	x__sub0.01	x__sub0.01	x__sub0.01	x__sub0.01	x__sub0.01	12	0	1	0	14	0	1	0	10	0	0	0	11	0	0	0	10	0	0	0	26	0	0	0	3	0	0	0	16	0	0	0	20	0	0	0	17	0	0	0	11	0
a34c82bcd35ae67e3d652e41569ff053_rep;size=977;	x__sub0.01	x__sub0.01	x__sub0.01	x__sub0.01	x__sub0.01	x__sub0.01	x__sub0.01	22	0	0	0	18	0	0	0	23	0	0	0	36	0	0	0	39	0	0	0	27	0	0	0	13	0	0	0	32	0	0	0	15	0	0	0	31	0	0	0	13	0
570d5328b0de0031b1ae92b0b855241d_rep;size=962;	x__sub0.01	x__sub0.01	x__sub0.01	x__sub0.01	x__sub0.01	x__sub0.01	x__sub0.01	32	0	0	0	32	0	0	0	19	0	0	0	28	0	0	0	44	0	0	0	24	0	0	0	16	0	0	0	34	0	0	0	22	0	0	1	23	0	0	0	24	0
d69840189a0ec4666abe07e11e6d0dda_rep;size=932;	x__sub0.01	x__sub0.01	x__sub0.01	x__sub0.01	x__sub0.01	x__sub0.01	x__sub0.01	0	0	0	0	0	0	0	0	0	0	0	0	0	0	0	0	0	0	0	0	0	0	0	0	0	0	0	0	0	0	0	0	0	0	0	1	0	0	0	0	0	0
1cde1a1c6f0ed276ffb71798c839357b_rep;size=925;	x__sub0.01	x__sub0.01	x__sub0.01	x__sub0.01	x__sub0.01	x__sub0.01	x__sub0.01	3	0	0	1	1	0	0	0	1	0	0	0	0	0	0	0	0	0	0	0	3	0	0	0	0	0	0	0	0	0	0	0	0	0	0	0	0	0	0	0	0	0
a96cdbbcc9c951ab765683761a3c18f1_rep;size=925;	x__sub0.01	x__sub0.01	x__sub0.01	x__sub0.01	x__sub0.01	x__sub0.01	x__sub0.01	1	1	4	0	1	1	2	2	0	4	1	1	0	1	2	2	2	2	1	5	0	3	2	5	0	2	1	4	1	1	2	4	0	3	3	1	1	3	3	5	1	1
03e531024d64cf61d0b358d85e03efb9_rep;size=915;	x__sub0.01	x__sub0.01	x__sub0.01	x__sub0.01	x__sub0.01	x__sub0.01	x__sub0.01	0	0	0	0	3	0	0	0	2	0	0	0	5	0	0	0	5	0	0	0	12	0	0	0	0	0	0	0	7	0	0	0	4	0	0	0	5	0	0	0	0	0
0bf32343638f31a885b743773b2f84ef_rep;size=901;	x__sub0.01	x__sub0.01	x__sub0.01	x__sub0.01	x__sub0.01	x__sub0.01	x__sub0.01	0	0	0	0	4	0	0	0	4	0	0	0	6	0	0	0	4	0	0	0	5	0	0	0	0	0	0	0	7	0	0	0	4	0	0	0	6	0	0	0	7	0
5cae412e575f295942a50f6588df8c63_rep;size=890;	x__sub0.01	x__sub0.01	x__sub0.01	x__sub0.01	x__sub0.01	x__sub0.01	x__sub0.01	12	0	0	0	8	0	0	0	7	0	0	1	1	0	0	0	4	0	0	0	15	0	0	0	4	0	0	0	6	0	0	0	1	0	0	0	7	0	0	0	3	0
c69c027472946d05d4bf77638dcd99cd_rep;size=889;	x__sub0.01	x__sub0.01	x__sub0.01	x__sub0.01	x__sub0.01	x__sub0.01	x__sub0.01	0	0	0	0	0	0	0	1	0	0	0	2	0	0	0	1	0	0	0	0	0	0	0	0	0	0	1	1	0	0	0	3	0	1	0	0	0	1	0	1	0	0
8b8a4ab5ffe3244081f4b7e20e59f2bd_rep;size=885;	x__sub0.01	x__sub0.01	x__sub0.01	x__sub0.01	x__sub0.01	x__sub0.01	x__sub0.01	0	0	0	0	0	0	1	0	0	0	0	0	0	0	0	0	0	0	0	0	0	0	1	0	0	0	2	0	0	0	0	1	0	0	0	1	0	0	1	0	0	0
14b3ddd40a5830fc984c8ff8d7dfa992_rep;size=874;	x__sub0.01	x__sub0.01	x__sub0.01	x__sub0.01	x__sub0.01	x__sub0.01	x__sub0.01	24	0	0	0	26	0	0	0	22	0	2	0	2	0	0	0	17	0	0	0	81	0	0	0	30	0	0	0	28	0	0	0	12	0	0	0	32	0	0	0	39	0
15516df95934ed4478aca63ad3c99114_rep;size=869;	x__sub0.01	x__sub0.01	x__sub0.01	x__sub0.01	x__sub0.01	x__sub0.01	x__sub0.01	9	4	1	2	8	2	3	0	8	3	0	0	12	3	5	2	40	1	4	3	29	3	6	4	11	1	0	1	17	1	0	0	11	0	1	0	18	1	1	0	28	0
75c8224e8f2640fd8088338bb5ed434f_rep;size=866;	x__sub0.01	x__sub0.01	x__sub0.01	x__sub0.01	x__sub0.01	x__sub0.01	x__sub0.01	0	0	0	0	0	0	0	0	0	0	0	0	0	0	0	0	0	0	0	0	0	0	0	0	0	0	0	0	0	0	0	0	0	0	0	0	0	0	0	0	0	0
3d459f7c4d14f539d685e2113b34f636_rep;size=859;	x__sub0.01	x__sub0.01	x__sub0.01	x__sub0.01	x__sub0.01	x__sub0.01	x__sub0.01	16	0	0	0	14	0	0	0	12	0	0	0	11	0	0	0	17	0	0	0	16	0	0	0	5	0	0	0	13	0	0	0	11	0	0	0	19	0	0	0	8	0
dabacdc6eb032a18569fb6a65930d8a0_rep;size=856;	x__sub0.01	x__sub0.01	x__sub0.01	x__sub0.01	x__sub0.01	x__sub0.01	x__sub0.01	17	0	0	0	11	0	0	0	20	1	0	0	16	0	0	0	14	0	0	0	10	0	0	0	8	0	0	0	29	0	0	0	23	0	1	0	20	1	0	0	21	0
80847ba5618a5cbd8b8d8557f180a3fb_rep;size=851;	x__sub0.01	x__sub0.01	x__sub0.01	x__sub0.01	x__sub0.01	x__sub0.01	x__sub0.01	17	4	10	3	8	9	5	2	6	4	4	1	5	4	8	5	10	3	7	18	9	3	9	12	10	2	2	8	14	3	5	5	14	6	7	16	12	2	1	6	12	2
e3a22333f9bca366baf68e90e6723f3b_rep;size=847;	x__sub0.01	x__sub0.01	x__sub0.01	x__sub0.01	x__sub0.01	x__sub0.01	x__sub0.01	9	0	0	0	20	0	0	0	12	0	0	0	10	0	0	0	12	0	0	0	12	0	0	0	8	0	0	0	17	0	0	0	7	0	0	0	16	0	0	0	15	0
98e5bfbbc7bd3dc49fb65218e2606b6f_rep;size=836;	x__sub0.01	x__sub0.01	x__sub0.01	x__sub0.01	x__sub0.01	x__sub0.01	x__sub0.01	12	3	0	0	9	0	0	0	7	0	0	0	14	1	0	0	18	0	0	0	26	0	0	0	11	0	0	0	13	0	0	0	11	0	0	0	4	0	0	0	26	0
015497ae622c1919635e29a4e5de7373_rep;size=836;	x__sub0.01	x__sub0.01	x__sub0.01	x__sub0.01	x__sub0.01	x__sub0.01	x__sub0.01	0	0	0	0	1	0	0	0	0	0	0	0	0	0	0	2	0	0	1	1	0	0	0	2	0	0	0	0	0	0	0	0	0	0	0	2	0	0	0	0	0	0
4940869d9c74d1f4859785a83847b8d5_rep;size=830;	x__sub0.01	x__sub0.01	x__sub0.01	x__sub0.01	x__sub0.01	x__sub0.01	x__sub0.01	8	0	0	0	12	0	0	0	16	0	0	0	5	0	0	0	10	0	0	0	21	0	0	0	10	0	0	0	11	0	0	0	14	0	0	0	10	0	0	0	18	0
2f0666baad5d96173bf862027d4c92fb_rep;size=822;	x__sub0.01	x__sub0.01	x__sub0.01	x__sub0.01	x__sub0.01	x__sub0.01	x__sub0.01	0	0	0	0	0	0	0	0	1	0	0	0	0	0	0	0	1	0	0	0	0	0	0	0	0	0	0	0	4	0	0	0	6	0	0	0	0	0	0	0	2	0
444f1203a543f3db47120ef03698e4ec_rep;size=810;	x__sub0.01	x__sub0.01	x__sub0.01	x__sub0.01	x__sub0.01	x__sub0.01	x__sub0.01	0	2	7	13	0	2	7	17	0	1	8	22	0	1	3	3	0	0	1	6	0	0	4	9	0	1	7	19	0	1	7	15	0	0	4	14	0	0	6	20	0	4
bde205bfb92f3b96707c94bffbfaa127_rep;size=808;	x__sub0.01	x__sub0.01	x__sub0.01	x__sub0.01	x__sub0.01	x__sub0.01	x__sub0.01	0	0	0	1	0	0	3	0	0	0	0	0	0	0	0	0	0	0	0	1	0	0	3	1	0	0	0	0	0	0	0	0	0	0	0	0	0	0	0	0	0	1
d30460fb6a66e643ed43e02380cdb71b_rep;size=805;	x__sub0.01	x__sub0.01	x__sub0.01	x__sub0.01	x__sub0.01	x__sub0.01	x__sub0.01	0	0	0	0	0	0	0	0	0	0	0	0	0	0	0	0	0	0	0	0	0	0	0	0	0	0	0	0	0	0	0	0	0	0	0	0	3	0	0	0	0	0
ac3100188b8324155dad139cff6d5a41_rep;size=805;	x__sub0.01	x__sub0.01	x__sub0.01	x__sub0.01	x__sub0.01	x__sub0.01	x__sub0.01	0	0	0	1	0	1	0	1	0	0	1	1	0	0	0	0	0	0	0	0	0	0	0	0	0	0	0	0	0	0	0	0	0	0	0	1	0	0	0	0	0	0
ca110908566df8985e4801880eed51c4_rep;size=804;	x__sub0.01	x__sub0.01	x__sub0.01	x__sub0.01	x__sub0.01	x__sub0.01	x__sub0.01	3	0	0	0	4	0	0	0	9	0	0	0	8	0	0	0	28	0	0	0	13	0	0	0	2	0	0	0	6	0	0	0	7	0	0	0	7	0	0	0	8	0
a1987962a988f146dd36e42ecb6ab095_rep;size=802;	x__sub0.01	x__sub0.01	x__sub0.01	x__sub0.01	x__sub0.01	x__sub0.01	x__sub0.01	0	0	0	2	0	1	2	2	0	0	0	2	0	0	0	0	0	0	2	0	0	0	0	0	0	0	0	4	0	0	0	3	0	0	2	0	0	0	0	1	0	0
14c889bc18eacb8226fd921420cfd1e1_rep;size=797;	x__sub0.01	x__sub0.01	x__sub0.01	x__sub0.01	x__sub0.01	x__sub0.01	x__sub0.01	6	0	0	0	7	0	0	0	10	0	0	0	5	0	0	0	8	0	0	0	7	0	0	0	5	0	0	0	11	0	0	0	14	0	0	0	8	0	1	0	9	0
e9ca9da681ccd5c90a94011f8685af43_rep;size=789;	x__sub0.01	x__sub0.01	x__sub0.01	x__sub0.01	x__sub0.01	x__sub0.01	x__sub0.01	13	0	0	0	13	0	0	0	11	0	0	0	7	0	0	0	13	0	0	0	5	0	0	0	13	0	0	0	9	0	0	0	8	0	0	0	8	0	0	0	16	0
2a4237e93f8d28c1eecca62e1688890e_rep;size=789;	x__sub0.01	x__sub0.01	x__sub0.01	x__sub0.01	x__sub0.01	x__sub0.01	x__sub0.01	21	0	0	0	22	0	0	0	18	0	0	0	23	0	1	0	17	0	0	0	33	0	0	0	15	0	0	0	19	0	0	0	5	0	0	0	37	0	0	0	13	0
922f559c085e5b815eafa9d05d6deb71_rep;size=788;	x__sub0.01	x__sub0.01	x__sub0.01	x__sub0.01	x__sub0.01	x__sub0.01	x__sub0.01	0	1	0	2	0	0	1	1	0	1	1	0	0	0	1	0	0	0	1	4	1	1	1	2	1	1	0	1	1	0	0	0	1	0	2	0	0	1	1	0	0	2
4d5b90029d88424a7c447ea7b4c8839a_rep;size=775;	x__sub0.01	x__sub0.01	x__sub0.01	x__sub0.01	x__sub0.01	x__sub0.01	x__sub0.01	0	2	0	1	0	0	0	0	0	0	1	1	0	0	0	0	0	0	0	0	0	0	0	1	0	0	0	0	0	0	0	1	0	0	0	0	0	0	0	1	0	0
e53566ba43f57d1369ec0e1cd0ff361a_rep;size=768;	x__sub0.01	x__sub0.01	x__sub0.01	x__sub0.01	x__sub0.01	x__sub0.01	x__sub0.01	0	3	4	2	0	4	0	3	0	2	2	5	0	0	2	0	0	1	2	2	0	3	1	2	1	0	1	2	0	0	1	3	1	0	1	1	3	1	0	2	0	1
39aa0fce54f23946a460c3b733d250c2_rep;size=768;	x__sub0.01	x__sub0.01	x__sub0.01	x__sub0.01	x__sub0.01	x__sub0.01	x__sub0.01	0	0	3	0	0	0	1	0	0	0	0	1	0	0	0	0	0	0	2	0	0	0	0	0	0	0	0	1	0	0	1	0	0	1	0	1	1	0	1	0	0	0
83488b90b5e8077f2552d68f47d6fe60_rep;size=762;	x__sub0.01	x__sub0.01	x__sub0.01	x__sub0.01	x__sub0.01	x__sub0.01	x__sub0.01	0	0	0	0	0	0	0	0	5	0	0	0	1	0	0	0	1	0	0	0	3	0	0	0	3	0	0	0	2	0	0	0	8	0	0	0	8	0	0	0	2	0
dfd5a59ac4ceba96d57cd1b0aa3e66ee_rep;size=756;	x__sub0.01	x__sub0.01	x__sub0.01	x__sub0.01	x__sub0.01	x__sub0.01	x__sub0.01	0	0	0	1	0	0	1	0	0	0	0	1	0	0	2	1	0	0	0	0	0	0	0	0	0	0	0	1	0	0	0	1	0	0	0	0	0	0	0	0	0	0
5513a2c337fc16ad04d7cd4b42e21bd9_rep;size=754;	x__sub0.01	x__sub0.01	x__sub0.01	x__sub0.01	x__sub0.01	x__sub0.01	x__sub0.01	1	0	0	0	4	0	0	0	7	0	0	0	1	0	0	0	8	0	0	0	3	0	0	0	4	0	0	0	1	0	0	0	0	0	0	0	0	0	0	0	1	0
c7f92ad7393ec49428e3b396855ab08e_rep;size=752;	x__sub0.01	x__sub0.01	x__sub0.01	x__sub0.01	x__sub0.01	x__sub0.01	x__sub0.01	26	0	0	0	4	0	0	1	20	0	0	0	16	0	0	0	5	0	0	0	13	0	0	0	6	0	0	0	15	0	0	0	13	1	0	0	15	1	0	0	9	0
5819eb639c8086741a98ac5d1bd4dc36_rep;size=751;	x__sub0.01	x__sub0.01	x__sub0.01	x__sub0.01	x__sub0.01	x__sub0.01	x__sub0.01	0	2	1	2	0	0	0	1	0	0	0	5	0	0	0	1	0	0	1	0	0	0	0	3	0	0	1	4	0	0	1	2	0	0	1	3	0	0	1	0	0	0
97a6de9698282b39a000431e88fba353_rep;size=749;	x__sub0.01	x__sub0.01	x__sub0.01	x__sub0.01	x__sub0.01	x__sub0.01	x__sub0.01	0	1	0	0	0	1	0	1	0	0	0	0	0	0	0	0	0	0	0	0	0	0	0	1	0	0	0	1	0	0	0	0	0	0	0	4	0	0	1	1	0	0
10946629b4eab5550a8bfdb6fe829d4e_rep;size=742;	x__sub0.01	x__sub0.01	x__sub0.01	x__sub0.01	x__sub0.01	x__sub0.01	x__sub0.01	0	0	2	2	0	3	1	1	0	2	0	3	1	1	1	0	0	0	0	1	0	1	1	0	0	0	0	3	0	0	0	2	0	1	1	1	0	2	2	3	1	1
7538a46832717b9cef19ee71d11cc37a_rep;size=733;	x__sub0.01	x__sub0.01	x__sub0.01	x__sub0.01	x__sub0.01	x__sub0.01	x__sub0.01	0	0	0	0	0	0	0	0	0	0	0	0	0	0	0	0	0	0	0	0	0	0	0	0	0	0	0	1	0	0	0	0	0	0	0	0	0	0	1	0	0	0
e2518e56293a2cdb6ae21b8856daa618_rep;size=728;	x__sub0.01	x__sub0.01	x__sub0.01	x__sub0.01	x__sub0.01	x__sub0.01	x__sub0.01	12	0	0	0	16	0	0	0	14	0	0	0	16	0	0	0	22	0	0	0	13	0	0	0	11	0	0	0	13	0	0	0	10	0	0	0	14	0	0	0	11	0
15bed5795d9dc3e215cccf881bacd3b7_rep;size=726;	x__sub0.01	x__sub0.01	x__sub0.01	x__sub0.01	x__sub0.01	x__sub0.01	x__sub0.01	0	0	1	0	0	2	1	1	0	0	0	0	0	1	0	0	0	0	0	0	0	0	0	0	1	0	0	0	0	0	0	2	0	0	0	0	0	0	0	1	0	0
e0cb664e97adc138c34ee044a0a3a001_rep;size=720;	x__sub0.01	x__sub0.01	x__sub0.01	x__sub0.01	x__sub0.01	x__sub0.01	x__sub0.01	1	4	9	8	2	6	6	5	6	1	5	4	1	2	3	2	0	3	1	4	2	3	1	2	0	0	4	5	0	1	0	2	0	3	0	4	1	3	3	4	5	1
ef852a9846a2cce79469d631995e5741_rep;size=719;	x__sub0.01	x__sub0.01	x__sub0.01	x__sub0.01	x__sub0.01	x__sub0.01	x__sub0.01	3	0	0	0	4	0	0	0	5	0	0	0	25	0	1	0	10	0	0	0	3	0	0	0	0	0	0	0	9	0	0	0	3	0	0	0	5	0	0	0	13	0
c33120bb6a526f198d308833789f44ff_rep;size=717;	x__sub0.01	x__sub0.01	x__sub0.01	x__sub0.01	x__sub0.01	x__sub0.01	x__sub0.01	0	2	0	1	0	0	0	1	0	1	1	0	0	0	0	0	0	0	0	1	0	1	0	0	0	0	0	0	0	0	1	2	0	0	0	1	1	0	0	2	0	0
42bd14bae2a3ed26a145d0e04b945867_rep;size=715;	x__sub0.01	x__sub0.01	x__sub0.01	x__sub0.01	x__sub0.01	x__sub0.01	x__sub0.01	5	0	0	0	10	0	0	0	0	0	0	0	6	0	0	0	3	0	0	0	8	0	0	0	3	0	0	0	3	0	0	0	15	0	0	0	12	0	0	0	10	0
b3a20e3a2969421a227d2874320329b7_rep;size=703;	x__sub0.01	x__sub0.01	x__sub0.01	x__sub0.01	x__sub0.01	x__sub0.01	x__sub0.01	0	0	0	0	0	0	0	1	0	0	0	0	0	0	0	1	0	0	0	0	0	0	0	1	0	1	1	0	0	0	0	1	0	2	0	0	0	0	0	0	1	0
019770be71b66881799a809df799585a_rep;size=688;	x__sub0.01	x__sub0.01	x__sub0.01	x__sub0.01	x__sub0.01	x__sub0.01	x__sub0.01	15	0	0	0	14	0	0	0	14	0	0	0	15	0	0	0	8	0	0	0	6	0	0	0	2	0	0	0	5	0	0	0	5	0	0	0	24	0	0	0	6	0
4a1f8df367a9833784ae9aa0fe74708b_rep;size=681;	x__sub0.01	x__sub0.01	x__sub0.01	x__sub0.01	x__sub0.01	x__sub0.01	x__sub0.01	0	0	0	0	1	0	0	0	31	0	0	0	15	0	0	2	0	0	0	0	52	0	0	0	0	0	0	0	31	0	0	0	0	0	0	0	42	0	0	0	8	0
ba076cd71c51e080f521684f79b75fd7_rep;size=672;	x__sub0.01	x__sub0.01	x__sub0.01	x__sub0.01	x__sub0.01	x__sub0.01	x__sub0.01	20	0	0	0	18	0	1	0	19	1	0	0	31	0	0	0	27	0	0	0	18	0	0	0	13	0	0	0	21	0	0	0	17	0	0	0	15	0	0	0	16	0
4fef7e1396e62d5f90a695afeea494ba_rep;size=668;	x__sub0.01	x__sub0.01	x__sub0.01	x__sub0.01	x__sub0.01	x__sub0.01	x__sub0.01	7	7	7	1	1	3	3	1	3	3	3	7	17	15	21	58	20	3	18	33	8	6	8	25	7	5	2	6	6	0	1	1	2	1	2	2	4	1	7	11	10	3
204fe7f52300c56087a623f2165c672c_rep;size=665;	x__sub0.01	x__sub0.01	x__sub0.01	x__sub0.01	x__sub0.01	x__sub0.01	x__sub0.01	0	0	4	2	0	3	3	5	0	0	0	5	0	1	3	7	0	1	1	4	0	1	3	1	1	0	1	7	0	0	1	4	0	0	2	1	0	0	1	9	0	1
2ce0ef4fa0d87f340e41640565ae9422_rep;size=664;	x__sub0.01	x__sub0.01	x__sub0.01	x__sub0.01	x__sub0.01	x__sub0.01	x__sub0.01	5	0	0	0	11	1	0	0	9	0	0	1	2	0	0	0	7	0	0	0	1	0	0	0	5	0	0	0	3	0	0	0	13	0	0	0	19	0	0	0	4	0
d15c2cce54dbf4dc245c490af739f7e2_rep;size=660;	x__sub0.01	x__sub0.01	x__sub0.01	x__sub0.01	x__sub0.01	x__sub0.01	x__sub0.01	2	2	3	4	3	2	1	4	0	0	0	4	1	0	1	1	1	2	1	0	1	0	1	1	0	0	0	2	2	1	0	4	2	1	0	0	5	1	0	4	0	3
5308d3a0f0d56ebb6bff10675a4cecc5_rep;size=653;	x__sub0.01	x__sub0.01	x__sub0.01	x__sub0.01	x__sub0.01	x__sub0.01	x__sub0.01	0	0	0	0	0	0	0	1	0	0	0	3	0	0	0	0	0	0	0	0	0	0	0	0	0	0	0	1	0	0	0	2	0	0	0	0	0	0	0	0	0	0
e8ae889534e385e5c58a51b62711198d_rep;size=643;	x__sub0.01	x__sub0.01	x__sub0.01	x__sub0.01	x__sub0.01	x__sub0.01	x__sub0.01	4	0	0	0	5	0	0	0	0	0	0	0	50	0	0	0	2	0	0	0	1	0	0	0	2	0	0	0	0	0	0	0	1	0	0	0	17	0	0	0	4	0
85bd8b49a0f42cb924c78dd3fdef0e88_rep;size=643;	x__sub0.01	x__sub0.01	x__sub0.01	x__sub0.01	x__sub0.01	x__sub0.01	x__sub0.01	27	0	0	0	22	0	0	0	20	0	0	0	5	0	0	0	20	0	0	0	24	0	0	0	7	0	0	0	21	0	0	0	11	0	0	0	28	0	0	0	13	0
4b0cd81637974a4f992b3f7ead915175_rep;size=640;	x__sub0.01	x__sub0.01	x__sub0.01	x__sub0.01	x__sub0.01	x__sub0.01	x__sub0.01	0	0	0	0	0	0	1	0	0	0	0	0	0	0	0	0	0	0	0	2	0	0	0	0	0	0	0	0	0	0	0	1	0	0	0	1	0	0	1	0	0	0
5b50715ec383706b83cfac331d86956c_rep;size=640;	x__sub0.01	x__sub0.01	x__sub0.01	x__sub0.01	x__sub0.01	x__sub0.01	x__sub0.01	0	0	0	1	0	1	1	0	0	1	0	0	0	0	0	0	0	0	0	1	0	0	0	0	0	0	0	0	0	1	0	1	0	0	1	0	0	0	0	1	0	0
9eb81a406b5b84ba326f73256736d9cd_rep;size=636;	x__sub0.01	x__sub0.01	x__sub0.01	x__sub0.01	x__sub0.01	x__sub0.01	x__sub0.01	0	0	0	1	0	0	1	3	0	0	1	1	0	0	0	0	0	0	0	0	0	0	0	0	0	0	0	3	0	0	0	1	0	0	1	1	0	0	0	2	0	0
c51635ca9d3416dccfe41ebb29cba95e_rep;size=635;	x__sub0.01	x__sub0.01	x__sub0.01	x__sub0.01	x__sub0.01	x__sub0.01	x__sub0.01	16	1	0	0	12	0	0	1	5	0	0	0	14	0	0	0	55	0	0	0	26	0	0	0	1	0	0	0	23	0	0	0	13	0	0	0	12	0	0	0	3	0
43edc384a3eba7f321d156c2c21e83b2_rep;size=631;	x__sub0.01	x__sub0.01	x__sub0.01	x__sub0.01	x__sub0.01	x__sub0.01	x__sub0.01	0	3	0	2	0	0	1	2	1	1	2	1	0	1	4	1	0	2	0	1	0	0	0	3	0	0	2	6	0	0	0	4	1	1	0	2	1	0	0	1	2	2
5395d4e0ad9cfd2ec04547bd76d88afb_rep;size=626;	x__sub0.01	x__sub0.01	x__sub0.01	x__sub0.01	x__sub0.01	x__sub0.01	x__sub0.01	0	4	3	3	0	1	5	1	0	1	4	5	0	0	2	1	0	0	2	2	0	0	1	3	0	1	1	0	3	1	1	6	1	1	1	3	1	1	1	1	1	1
23729e6d66aa3db98ca90f2dee8b5d6b_rep;size=624;	x__sub0.01	x__sub0.01	x__sub0.01	x__sub0.01	x__sub0.01	x__sub0.01	x__sub0.01	0	0	0	1	0	1	0	0	0	0	0	1	0	0	0	0	0	0	0	1	0	0	0	0	0	0	0	0	0	0	0	0	0	0	0	1	0	0	1	0	0	0
eab91cfcc2a59f37b8a5925dac4203d0_rep;size=621;	x__sub0.01	x__sub0.01	x__sub0.01	x__sub0.01	x__sub0.01	x__sub0.01	x__sub0.01	0	2	1	4	1	1	1	2	0	1	2	3	0	0	0	1	3	0	1	2	1	1	0	0	1	0	1	0	1	0	0	0	3	1	1	0	2	3	0	0	3	0
bdcc88b12bede12969d881419b1446d3_rep;size=616;	x__sub0.01	x__sub0.01	x__sub0.01	x__sub0.01	x__sub0.01	x__sub0.01	x__sub0.01	4	0	0	0	4	0	0	0	14	0	0	0	12	0	0	0	12	0	0	0	11	0	0	0	3	0	0	0	10	0	0	0	4	0	0	0	13	2	0	0	2	0
0e40394327bbba60eaeba00eda091f18_rep;size=615;	x__sub0.01	x__sub0.01	x__sub0.01	x__sub0.01	x__sub0.01	x__sub0.01	x__sub0.01	1	23	28	6	0	25	14	9	0	5	16	5	1	5	7	9	2	4	14	21	0	9	12	18	2	9	6	18	1	15	6	23	3	21	13	12	3	14	1	14	1	16
c3103a2a00e47a983b7353c9f02740be_rep;size=592;	x__sub0.01	x__sub0.01	x__sub0.01	x__sub0.01	x__sub0.01	x__sub0.01	x__sub0.01	0	0	0	0	0	0	0	0	1	0	0	0	1	0	0	0	0	0	0	0	0	0	0	0	0	0	0	0	0	0	0	0	0	0	0	0	0	0	0	0	0	0
11fed8f0b753e0c092cf19089520c736_rep;size=589;	x__sub0.01	x__sub0.01	x__sub0.01	x__sub0.01	x__sub0.01	x__sub0.01	x__sub0.01	1	0	1	0	1	0	0	0	1	0	0	0	16	0	0	0	11	0	0	0	6	0	0	0	1	0	0	0	2	0	0	0	0	0	0	0	1	0	0	0	9	0
d4f6f4f5d118d39dfa40ffc042268ced_rep;size=584;	x__sub0.01	x__sub0.01	x__sub0.01	x__sub0.01	x__sub0.01	x__sub0.01	x__sub0.01	0	1	0	0	0	0	0	1	0	0	1	1	0	0	0	0	0	0	0	1	0	0	0	0	0	0	0	0	0	0	0	1	0	0	0	0	0	0	0	0	0	0
7994ae66b0db1cee2fb0be78e6976bb4_rep;size=583;	x__sub0.01	x__sub0.01	x__sub0.01	x__sub0.01	x__sub0.01	x__sub0.01	x__sub0.01	0	2	0	0	0	0	0	0	0	0	1	0	0	0	0	0	0	0	0	0	0	0	0	0	0	0	0	2	0	0	0	0	0	0	1	0	0	1	0	0	0	0
8606933f0f39b640a8753187859fd73a_rep;size=579;	x__sub0.01	x__sub0.01	x__sub0.01	x__sub0.01	x__sub0.01	x__sub0.01	x__sub0.01	0	0	0	0	1	0	0	0	2	0	0	0	2	0	0	0	0	0	0	0	2	0	0	0	0	0	0	0	0	0	0	0	1	1	0	0	0	0	0	0	1	0
6796766381289378d9f78e90e5a16e97_rep;size=574;	x__sub0.01	x__sub0.01	x__sub0.01	x__sub0.01	x__sub0.01	x__sub0.01	x__sub0.01	0	0	0	0	0	0	0	0	0	0	0	0	0	0	0	0	0	0	0	0	0	0	0	0	0	0	0	0	0	0	0	0	0	0	0	0	0	0	0	0	0	0
edf704b0530e6bd3851e28360e41cdae_rep;size=567;	x__sub0.01	x__sub0.01	x__sub0.01	x__sub0.01	x__sub0.01	x__sub0.01	x__sub0.01	29	0	0	0	14	0	0	0	32	0	0	0	17	1	0	1	25	0	0	0	20	0	0	0	11	0	0	0	26	0	0	0	29	0	0	0	30	0	1	0	26	0
20b9e923180386055d52c6fa8af8a6d0_rep;size=563;	x__sub0.01	x__sub0.01	x__sub0.01	x__sub0.01	x__sub0.01	x__sub0.01	x__sub0.01	0	0	0	0	6	0	0	0	4	0	0	0	1	0	0	0	15	0	0	0	3	0	0	0	1	0	0	0	3	0	0	0	0	0	0	0	13	0	0	0	3	0
d60906e700ee24fd205bc8fed14ef54d_rep;size=562;	x__sub0.01	x__sub0.01	x__sub0.01	x__sub0.01	x__sub0.01	x__sub0.01	x__sub0.01	0	4	3	1	0	2	4	0	0	0	1	3	2	1	3	0	1	2	1	1	0	0	1	1	0	0	1	2	0	0	0	0	2	0	1	0	1	1	0	1	1	0
d86784c6de3b7d41da534a914e9f782e_rep;size=561;	x__sub0.01	x__sub0.01	x__sub0.01	x__sub0.01	x__sub0.01	x__sub0.01	x__sub0.01	1	0	0	0	6	0	0	0	1	0	0	0	1	0	0	0	1	0	0	0	2	0	0	0	0	0	0	0	0	0	0	0	0	0	0	0	0	0	0	0	1	0
f0344b1255d9fed3487de7cbece79a3a_rep;size=557;	x__sub0.01	x__sub0.01	x__sub0.01	x__sub0.01	x__sub0.01	x__sub0.01	x__sub0.01	0	1	0	0	0	0	0	2	0	0	0	0	0	0	0	0	0	0	0	0	0	0	1	1	0	0	0	0	0	0	0	1	0	0	0	0	0	0	0	0	0	1
abe2701f4ed72a92391a93277308ad8d_rep;size=553;	x__sub0.01	x__sub0.01	x__sub0.01	x__sub0.01	x__sub0.01	x__sub0.01	x__sub0.01	0	0	0	0	0	0	0	0	0	0	0	0	0	0	0	0	0	0	0	0	0	0	0	0	0	0	0	0	0	0	0	0	0	0	0	0	0	0	0	0	0	0
2d474c2e8abece0a9f9d8e27db50ce50_rep;size=545;	x__sub0.01	x__sub0.01	x__sub0.01	x__sub0.01	x__sub0.01	x__sub0.01	x__sub0.01	0	2	0	0	0	1	0	1	0	0	0	2	0	0	0	0	0	0	0	0	0	0	0	0	0	0	0	0	0	0	0	1	0	0	1	1	0	0	0	1	0	0
453eb868e6cc5b8cdfb7b41a51327ac8_rep;size=542;	x__sub0.01	x__sub0.01	x__sub0.01	x__sub0.01	x__sub0.01	x__sub0.01	x__sub0.01	7	0	0	0	3	0	0	0	10	0	0	0	7	0	0	0	4	0	0	0	3	0	0	0	3	0	0	0	5	0	0	0	2	0	0	0	8	0	0	0	3	0
85a320399386d17cb5cb2f62c3016028_rep;size=539;	x__sub0.01	x__sub0.01	x__sub0.01	x__sub0.01	x__sub0.01	x__sub0.01	x__sub0.01	0	0	0	0	2	0	1	0	4	0	0	0	0	0	0	0	0	0	0	0	0	0	0	0	0	0	0	0	0	0	0	0	0	0	0	0	0	0	0	0	2	0
99d550ed528182f9e9447b77e8417215_rep;size=536;	k__Fungi	p__Ascomycota	c__Eurotiomycetes	o__Chaetothyriales	f__Herpotrichiellaceae	g__Rhinocladiella	s__Rhinocladiella_similis	0	0	0	0	1	0	0	0	0	0	0	0	0	0	0	0	0	0	0	0	0	0	0	0	0	0	0	0	1	0	0	0	0	0	0	0	0	0	0	0	0	0
9aaba00f04cf3868eead133fb00af60e_rep;size=534;	x__sub0.01	x__sub0.01	x__sub0.01	x__sub0.01	x__sub0.01	x__sub0.01	x__sub0.01	8	0	0	0	7	0	0	0	21	0	0	0	14	0	0	0	15	0	0	0	14	0	0	0	11	0	0	0	15	0	0	0	9	0	0	0	14	0	0	0	19	0
ff9ca30a17e8d1689a9de6a0cc0312c5_rep;size=533;	x__sub0.01	x__sub0.01	x__sub0.01	x__sub0.01	x__sub0.01	x__sub0.01	x__sub0.01	0	0	0	0	0	0	0	0	0	0	0	1	0	0	0	0	0	0	0	0	0	0	0	0	0	0	0	3	0	0	0	4	0	0	0	0	0	0	0	0	0	0
1366546cd649f670e9e04ee7b48ca99a_rep;size=531;	x__sub0.01	x__sub0.01	x__sub0.01	x__sub0.01	x__sub0.01	x__sub0.01	x__sub0.01	3	0	0	0	5	0	0	0	8	0	0	0	6	0	0	0	1	0	0	0	7	0	0	0	1	0	0	0	3	0	0	0	6	0	0	0	5	0	0	0	8	0
91f6b31ee806e7ba6ef87aed32dffa84_rep;size=530;	x__sub0.01	x__sub0.01	x__sub0.01	x__sub0.01	x__sub0.01	x__sub0.01	x__sub0.01	0	0	0	0	1	0	0	0	0	0	0	0	0	0	0	0	0	0	0	0	1	0	0	0	0	0	0	0	0	0	0	0	0	0	0	0	0	0	0	0	0	0
26a7aeefd8c18ed560d58cc5c9825894_rep;size=522;	x__sub0.01	x__sub0.01	x__sub0.01	x__sub0.01	x__sub0.01	x__sub0.01	x__sub0.01	1	0	0	0	1	0	0	0	3	0	0	0	0	0	0	0	5	0	0	0	3	0	0	0	0	0	0	0	1	0	0	0	0	0	0	0	3	0	0	0	0	0
96a3fbb6bc047f87a02dd7db14de72a4_rep;size=522;	x__sub0.01	x__sub0.01	x__sub0.01	x__sub0.01	x__sub0.01	x__sub0.01	x__sub0.01	2	0	3	3	2	2	6	1	2	2	1	2	1	2	0	0	0	4	0	1	5	3	1	4	1	1	2	2	0	0	2	5	0	1	3	4	0	1	2	7	1	2
dec935e9cdf8aa87e7f021d4b96acd2c_rep;size=511;	x__sub0.01	x__sub0.01	x__sub0.01	x__sub0.01	x__sub0.01	x__sub0.01	x__sub0.01	0	0	0	1	0	0	0	0	0	0	0	0	0	0	0	1	0	0	0	0	0	0	0	0	0	0	0	1	0	0	0	2	0	0	0	0	0	0	0	1	0	0
2b2040b8becb0f93eb56cb3764073456_rep;size=509;	x__sub0.01	x__sub0.01	x__sub0.01	x__sub0.01	x__sub0.01	x__sub0.01	x__sub0.01	13	0	0	0	0	0	0	0	3	0	0	0	4	0	0	0	10	0	0	0	23	0	0	0	3	0	0	0	2	0	0	0	5	0	0	0	22	0	0	0	0	0
adbefe067eae80d003f7b1ad43f161a2_rep;size=505;	x__sub0.01	x__sub0.01	x__sub0.01	x__sub0.01	x__sub0.01	x__sub0.01	x__sub0.01	6	0	0	0	2	0	0	0	3	0	0	0	2	0	0	0	2	0	0	0	2	0	0	0	0	0	0	0	1	0	0	0	2	0	0	0	4	0	0	0	3	0
a3923b4b738af9313e83248c57a35e74_rep;size=494;	x__sub0.01	x__sub0.01	x__sub0.01	x__sub0.01	x__sub0.01	x__sub0.01	x__sub0.01	0	0	0	1	0	0	2	1	0	0	0	0	0	0	0	0	0	0	0	0	0	0	0	0	0	0	0	0	0	0	0	1	0	0	0	1	0	1	0	0	0	0
62f39870f99ff93549f899695181140e_rep;size=493;	x__sub0.01	x__sub0.01	x__sub0.01	x__sub0.01	x__sub0.01	x__sub0.01	x__sub0.01	3	0	0	0	18	0	0	0	8	0	0	0	0	0	0	0	2	0	0	0	10	0	0	0	27	0	0	0	1	0	0	0	5	0	0	0	2	0	0	0	0	0
c80d362ff413757b248b340f89b6d6eb_rep;size=492;	x__sub0.01	x__sub0.01	x__sub0.01	x__sub0.01	x__sub0.01	x__sub0.01	x__sub0.01	24	0	0	0	0	3	0	0	0	0	1	0	0	0	0	0	10	0	2	0	16	0	0	1	13	0	0	0	1	0	0	0	31	1	0	0	21	0	0	0	0	0
ce126992eacc506cf6832bb28508ff6b_rep;size=487;	x__sub0.01	x__sub0.01	x__sub0.01	x__sub0.01	x__sub0.01	x__sub0.01	x__sub0.01	0	0	0	0	0	0	0	0	0	0	0	0	0	0	0	0	6	0	0	1	1	0	0	0	1	0	0	0	0	0	0	0	0	0	0	0	4	0	0	0	2	0
14b180c2e48a2aca7303c7b95028557a_rep;size=479;	x__sub0.01	x__sub0.01	x__sub0.01	x__sub0.01	x__sub0.01	x__sub0.01	x__sub0.01	0	1	2	0	0	1	0	0	0	0	0	2	0	2	2	1	0	1	4	6	3	2	3	2	0	0	3	6	0	2	3	7	1	1	6	5	0	2	2	5	0	0
d5ba34ee0c88285fccea38edf08dceeb_rep;size=475;	x__sub0.01	x__sub0.01	x__sub0.01	x__sub0.01	x__sub0.01	x__sub0.01	x__sub0.01	0	0	0	0	0	0	0	0	0	0	0	1	0	0	0	0	0	0	0	1	0	0	0	0	0	0	0	2	0	0	0	0	0	0	0	0	0	0	1	6	0	0
fef3089d91f053e712f828a94f716b59_rep;size=474;	x__sub0.01	x__sub0.01	x__sub0.01	x__sub0.01	x__sub0.01	x__sub0.01	x__sub0.01	6	0	0	0	4	0	0	0	10	0	0	0	6	0	0	0	4	0	0	0	10	0	0	0	2	0	0	0	5	0	0	0	1	0	0	0	16	0	0	0	3	0
cd3fee4fbecacaceec841e2cf33d0ae6_rep;size=470;	x__sub0.01	x__sub0.01	x__sub0.01	x__sub0.01	x__sub0.01	x__sub0.01	x__sub0.01	0	1	2	0	0	1	2	1	0	0	0	1	0	3	1	3	1	0	0	1	1	1	1	0	0	1	2	0	3	1	0	0	1	0	1	0	0	2	0	3	1	1
b9aef15f9a080db72158ad40e454f1ea_rep;size=466;	x__sub0.01	x__sub0.01	x__sub0.01	x__sub0.01	x__sub0.01	x__sub0.01	x__sub0.01	0	0	0	0	0	0	0	0	0	0	0	0	0	0	1	0	0	0	0	0	0	0	0	0	0	0	0	0	0	0	0	0	0	0	0	0	0	0	0	0	0	0
d5f51bcabbb97dce49fe657bb9be0166_rep;size=464;	x__sub0.01	x__sub0.01	x__sub0.01	x__sub0.01	x__sub0.01	x__sub0.01	x__sub0.01	11	2	0	1	11	1	0	0	5	0	0	1	7	0	0	0	7	0	0	0	21	0	1	0	2	1	0	0	11	0	0	0	5	0	0	0	26	0	0	0	12	0
8067590fa74163555c406d85427f18ff_rep;size=463;	x__sub0.01	x__sub0.01	x__sub0.01	x__sub0.01	x__sub0.01	x__sub0.01	x__sub0.01	0	0	0	0	0	0	0	0	0	0	0	0	1	0	1	0	1	0	0	0	0	1	0	0	0	0	0	0	1	0	0	0	0	0	0	0	0	0	0	0	3	0
63b74f8c485294ea8a6f185445295f2f_rep;size=448;	x__sub0.01	x__sub0.01	x__sub0.01	x__sub0.01	x__sub0.01	x__sub0.01	x__sub0.01	7	0	0	0	11	0	0	0	7	0	0	0	5	0	0	0	15	0	0	0	11	0	0	0	5	0	0	0	5	0	0	0	15	0	0	0	16	0	0	0	4	0
fc4d5b254426317256230ee279851fc7_rep;size=446;	x__sub0.01	x__sub0.01	x__sub0.01	x__sub0.01	x__sub0.01	x__sub0.01	x__sub0.01	0	0	0	0	0	0	0	0	0	0	0	0	0	0	0	0	0	0	0	0	0	0	0	0	0	0	0	0	0	0	0	0	0	0	0	0	0	0	0	0	0	0
e3e5f484f0e76a4a6a3fc29fd0e03269_rep;size=435;	x__sub0.01	x__sub0.01	x__sub0.01	x__sub0.01	x__sub0.01	x__sub0.01	x__sub0.01	0	0	0	0	0	1	0	1	0	0	0	0	0	0	0	0	0	0	0	0	0	0	0	0	0	0	0	0	0	0	0	0	0	0	0	0	0	0	0	0	0	0
1656225864667c6258da90f8a0a41e42_rep;size=435;	x__sub0.01	x__sub0.01	x__sub0.01	x__sub0.01	x__sub0.01	x__sub0.01	x__sub0.01	0	0	2	0	0	1	1	0	0	0	0	6	0	0	0	0	0	0	0	1	0	0	0	0	0	0	1	3	0	0	0	2	0	0	1	1	0	0	1	2	0	0
1dffc5c262f2a7bc798b6c9db7568743_rep;size=434;	x__sub0.01	x__sub0.01	x__sub0.01	x__sub0.01	x__sub0.01	x__sub0.01	x__sub0.01	2	0	0	1	3	0	0	0	10	0	0	0	13	0	0	0	8	0	0	0	13	0	0	0	5	0	0	0	4	0	0	0	9	0	0	0	12	0	0	0	19	0
9c678c1362623b21b507bca9b058ba74_rep;size=433;	x__sub0.01	x__sub0.01	x__sub0.01	x__sub0.01	x__sub0.01	x__sub0.01	x__sub0.01	0	2	0	0	0	0	1	0	0	0	0	1	0	0	0	0	0	0	0	0	0	0	2	0	0	0	0	2	1	0	0	1	0	0	0	1	0	0	0	0	0	0
eb8ac1a7944c9b6fd68332fc29c99b84_rep;size=433;	x__sub0.01	x__sub0.01	x__sub0.01	x__sub0.01	x__sub0.01	x__sub0.01	x__sub0.01	0	1	0	0	0	0	0	0	0	1	1	0	0	0	0	0	0	0	0	0	0	0	0	1	0	0	0	0	0	0	0	3	0	1	0	0	0	0	1	1	1	0
78fe12d4a11fec321f7da97410c210d5_rep;size=431;	x__sub0.01	x__sub0.01	x__sub0.01	x__sub0.01	x__sub0.01	x__sub0.01	x__sub0.01	0	0	0	0	0	0	0	0	0	0	0	0	0	0	0	0	0	0	0	0	0	0	0	0	0	0	0	0	0	0	0	0	0	0	0	0	0	0	0	0	0	0
32401131a5a8b62ec6e1ee5778370c02_rep;size=430;	x__sub0.01	x__sub0.01	x__sub0.01	x__sub0.01	x__sub0.01	x__sub0.01	x__sub0.01	1	0	4	6	1	2	5	0	0	0	2	2	0	0	3	0	0	0	1	0	0	0	5	1	0	0	0	1	0	0	0	2	0	0	0	1	1	0	0	0	1	0
c3c4413ad192537ab3364a2c85b076cb_rep;size=430;	x__sub0.01	x__sub0.01	x__sub0.01	x__sub0.01	x__sub0.01	x__sub0.01	x__sub0.01	0	11	3	1	0	5	4	2	0	2	0	2	1	6	10	16	0	3	6	14	0	1	4	9	0	6	16	51	0	6	4	28	0	4	4	10	1	2	9	40	0	1
8994d3751808373a5cedb5c1f3c445a3_rep;size=428;	x__sub0.01	x__sub0.01	x__sub0.01	x__sub0.01	x__sub0.01	x__sub0.01	x__sub0.01	1	0	0	0	0	0	0	0	2	0	0	0	0	0	0	0	0	0	0	0	1	0	0	0	0	0	0	0	3	0	0	0	0	0	0	0	1	0	0	0	2	0
37fd7bf05ed82c81e095cfdeb78aaff2_rep;size=428;	x__sub0.01	x__sub0.01	x__sub0.01	x__sub0.01	x__sub0.01	x__sub0.01	x__sub0.01	0	0	1	1	0	0	0	1	0	0	0	0	0	0	0	0	0	0	0	1	0	0	0	1	0	0	0	0	0	0	0	0	0	0	0	0	0	0	0	0	0	0
759a866e2363eca5fb6f2a742567c9a8_rep;size=427;	x__sub0.01	x__sub0.01	x__sub0.01	x__sub0.01	x__sub0.01	x__sub0.01	x__sub0.01	0	0	0	0	0	0	1	0	0	2	0	0	0	0	0	0	0	0	0	0	0	0	0	0	0	0	0	0	0	0	0	0	0	0	0	1	0	0	0	0	0	0
f20a4f0486c8cd0e983acc8d2315bb9a_rep;size=424;	x__sub0.01	x__sub0.01	x__sub0.01	x__sub0.01	x__sub0.01	x__sub0.01	x__sub0.01	36	0	6	2	0	0	3	0	3	3	0	0	5	0	1	1	18	0	1	2	1	3	4	1	9	0	0	1	17	0	0	0	28	0	0	0	7	3	0	2	32	0
e90222269ca0ab69ea1ba536407092ad_rep;size=421;	x__sub0.01	x__sub0.01	x__sub0.01	x__sub0.01	x__sub0.01	x__sub0.01	x__sub0.01	0	0	0	8	0	0	3	2	0	0	1	7	0	0	0	1	0	0	1	2	0	0	1	1	0	1	0	1	0	0	2	5	0	0	0	5	0	0	0	7	0	0
9789cf1db78688838e697b651cf930a3_rep;size=420;	x__sub0.01	x__sub0.01	x__sub0.01	x__sub0.01	x__sub0.01	x__sub0.01	x__sub0.01	0	0	0	0	0	0	0	0	2	0	0	0	0	0	0	0	1	0	0	0	2	0	0	0	3	0	0	0	0	0	0	0	1	0	0	0	0	0	0	0	1	0
63f8c8bdd636c16107dc1b45a28de31b_rep;size=420;	x__sub0.01	x__sub0.01	x__sub0.01	x__sub0.01	x__sub0.01	x__sub0.01	x__sub0.01	0	0	0	0	2	0	0	0	0	0	0	0	0	0	0	0	1	0	0	0	1	0	0	0	1	0	0	0	0	0	0	0	0	0	0	0	1	0	0	0	0	0
b6e35f88debe2d25a765359231553c34_rep;size=420;	x__sub0.01	x__sub0.01	x__sub0.01	x__sub0.01	x__sub0.01	x__sub0.01	x__sub0.01	13	0	0	0	11	0	0	0	20	0	0	0	14	0	0	0	10	0	0	0	26	0	0	0	18	0	0	0	23	0	0	0	15	0	0	0	12	0	0	0	19	0
0ad14e1d3488a2644ab5df90d9ce9cd9_rep;size=414;	x__sub0.01	x__sub0.01	x__sub0.01	x__sub0.01	x__sub0.01	x__sub0.01	x__sub0.01	0	0	0	0	6	0	0	0	2	0	0	0	1	0	0	0	21	0	0	0	2	0	0	0	7	0	0	0	0	0	0	0	0	0	0	0	13	0	0	0	15	0
6d4086b8e410661498b3e8854f4c38bf_rep;size=413;	x__sub0.01	x__sub0.01	x__sub0.01	x__sub0.01	x__sub0.01	x__sub0.01	x__sub0.01	0	0	0	0	2	0	0	0	0	0	0	0	0	0	0	0	3	0	0	0	0	0	0	0	0	0	0	0	1	0	0	0	0	0	0	0	0	0	0	0	0	0
1df8fd2c6dc9c01e0e24f699faabfb0b_rep;size=413;	x__sub0.01	x__sub0.01	x__sub0.01	x__sub0.01	x__sub0.01	x__sub0.01	x__sub0.01	0	0	0	0	0	0	0	0	1	0	0	0	2	0	0	0	0	0	0	0	0	0	0	0	0	0	0	0	0	0	0	0	0	0	0	0	0	0	0	0	0	0
4fe45bb9f00a1e43fabf3f0471ce9e8d_rep;size=410;	x__sub0.01	x__sub0.01	x__sub0.01	x__sub0.01	x__sub0.01	x__sub0.01	x__sub0.01	2	3	8	0	1	0	7	4	2	2	2	2	14	11	10	30	18	2	7	20	4	0	2	11	1	2	1	1	2	1	0	0	1	1	3	3	4	2	1	1	4	0
a77f86f16cdd68b4e79d623299aed194_rep;size=409;	x__sub0.01	x__sub0.01	x__sub0.01	x__sub0.01	x__sub0.01	x__sub0.01	x__sub0.01	7	0	0	0	7	0	0	0	1	0	0	0	5	0	0	0	3	0	0	0	5	0	0	0	1	0	0	0	5	0	0	0	1	0	0	0	5	0	0	0	18	0
9c0e2810007eac14acd7e90036324d35_rep;size=406;	x__sub0.01	x__sub0.01	x__sub0.01	x__sub0.01	x__sub0.01	x__sub0.01	x__sub0.01	0	0	0	0	0	0	0	0	0	0	0	0	0	0	0	0	0	0	0	0	0	0	0	0	0	0	0	0	0	0	0	0	0	0	0	0	0	0	0	0	0	0
177adac026a95e8120864a90cc2e660e_rep;size=402;	x__sub0.01	x__sub0.01	x__sub0.01	x__sub0.01	x__sub0.01	x__sub0.01	x__sub0.01	1	0	0	0	0	0	0	0	2	0	0	0	1	0	0	0	1	0	0	0	4	0	0	0	5	0	0	0	1	0	0	0	0	0	0	0	1	0	0	0	0	0
de348db0cdbb26e984a67abb72ef966b_rep;size=400;	x__sub0.01	x__sub0.01	x__sub0.01	x__sub0.01	x__sub0.01	x__sub0.01	x__sub0.01	4	0	0	0	2	0	0	0	2	0	0	0	0	0	0	0	2	0	0	0	1	0	0	0	9	0	0	0	4	0	0	0	5	0	0	0	13	0	0	0	0	0
e7494f5df1ce5ca33df1715319bd52c8_rep;size=400;	x__sub0.01	x__sub0.01	x__sub0.01	x__sub0.01	x__sub0.01	x__sub0.01	x__sub0.01	18	0	0	0	9	0	0	0	35	0	0	0	33	0	0	0	8	0	0	0	15	0	0	0	12	0	0	1	19	0	0	0	11	0	0	0	8	0	0	0	7	0
77950a5441b566f8d55a344e2e2c620b_rep;size=396;	x__sub0.01	x__sub0.01	x__sub0.01	x__sub0.01	x__sub0.01	x__sub0.01	x__sub0.01	0	1	0	1	0	1	0	0	0	0	0	0	0	0	0	0	0	0	0	1	0	0	0	0	0	0	0	3	0	0	0	0	0	0	0	0	0	0	0	0	0	0
a3568431123d58c6df16b71e37da6598_rep;size=392;	x__sub0.01	x__sub0.01	x__sub0.01	x__sub0.01	x__sub0.01	x__sub0.01	x__sub0.01	0	0	0	0	0	0	0	0	0	0	0	0	0	0	0	0	0	0	0	0	0	0	0	0	0	0	0	0	0	0	0	0	0	0	0	0	0	0	0	0	0	0
38cb3723230291faca3d4e4ee3cf27dd_rep;size=391;	x__sub0.01	x__sub0.01	x__sub0.01	x__sub0.01	x__sub0.01	x__sub0.01	x__sub0.01	0	0	0	0	0	0	0	0	0	0	0	0	0	0	0	0	0	0	1	0	0	0	0	0	0	0	0	0	0	0	0	0	0	0	0	1	0	0	0	0	0	0
ddc19eb9107141a27b171844ec3d1d23_rep;size=388;	x__sub0.01	x__sub0.01	x__sub0.01	x__sub0.01	x__sub0.01	x__sub0.01	x__sub0.01	0	0	0	1	0	1	0	0	0	0	0	0	0	0	0	0	0	0	0	0	0	0	0	0	0	0	0	0	0	0	0	0	0	0	0	0	0	0	0	0	0	0
aab52265927761e8ac8d7bed5c934ed7_rep;size=386;	x__sub0.01	x__sub0.01	x__sub0.01	x__sub0.01	x__sub0.01	x__sub0.01	x__sub0.01	5	1	0	0	15	0	1	0	6	0	0	0	11	0	0	0	12	0	0	0	15	0	0	0	13	0	0	0	8	0	0	0	7	0	0	0	17	0	0	0	17	0
198e13634ecaf413161595ea146f4ea6_rep;size=385;	x__sub0.01	x__sub0.01	x__sub0.01	x__sub0.01	x__sub0.01	x__sub0.01	x__sub0.01	1	0	0	0	2	0	0	0	0	0	0	0	1	0	0	0	3	0	0	0	0	0	0	0	5	0	0	0	0	0	0	0	1	0	0	0	1	0	0	0	0	0
a9c261a072c25c3f539e7623e5819686_rep;size=385;	x__sub0.01	x__sub0.01	x__sub0.01	x__sub0.01	x__sub0.01	x__sub0.01	x__sub0.01	8	0	0	0	7	0	0	0	8	0	0	0	5	0	0	0	7	0	0	0	6	0	0	0	5	0	0	0	7	0	0	0	5	0	0	0	6	0	0	0	4	0
5e78f83c251c0755de90327f394dc416_rep;size=377;	x__sub0.01	x__sub0.01	x__sub0.01	x__sub0.01	x__sub0.01	x__sub0.01	x__sub0.01	3	0	0	0	1	0	0	0	0	0	0	0	1	0	0	0	0	0	0	0	1	0	0	0	0	0	0	0	0	0	0	0	0	0	0	0	0	0	0	0	0	0
bae29dd25a45f7c798136f948507b513_rep;size=375;	x__sub0.01	x__sub0.01	x__sub0.01	x__sub0.01	x__sub0.01	x__sub0.01	x__sub0.01	0	0	0	0	0	0	0	0	0	0	0	0	0	0	0	0	0	0	0	0	0	0	0	0	0	0	0	0	0	0	0	0	0	0	0	0	0	0	0	0	0	0
cfe5bb1fccffdc083151931d22a981bc_rep;size=369;	x__sub0.01	x__sub0.01	x__sub0.01	x__sub0.01	x__sub0.01	x__sub0.01	x__sub0.01	16	0	0	0	7	0	0	0	7	0	0	0	0	0	0	0	7	0	0	0	6	0	0	1	3	0	0	0	12	0	0	0	5	0	0	0	13	0	0	0	2	0
1d89aebf44e62004a2f1316bc7534a0f_rep;size=369;	x__sub0.01	x__sub0.01	x__sub0.01	x__sub0.01	x__sub0.01	x__sub0.01	x__sub0.01	28	0	0	0	0	0	0	0	0	0	0	0	4	0	0	0	15	0	0	0	0	0	0	0	0	0	0	0	0	0	0	0	0	0	0	0	0	0	0	0	0	0
f5f4e2831a0adbe97c519145e6a3aa94_rep;size=367;	x__sub0.01	x__sub0.01	x__sub0.01	x__sub0.01	x__sub0.01	x__sub0.01	x__sub0.01	1	0	0	0	4	0	0	0	4	0	0	0	4	0	0	0	1	0	0	0	8	0	0	0	5	0	0	0	2	0	0	0	1	0	0	0	15	0	0	0	4	0
2cb101cc0884de830998c9a965b3a049_rep;size=366;	x__sub0.01	x__sub0.01	x__sub0.01	x__sub0.01	x__sub0.01	x__sub0.01	x__sub0.01	5	0	0	0	5	0	0	0	2	0	0	0	2	0	0	0	1	0	0	0	3	0	0	0	3	0	0	0	0	0	0	0	3	0	0	0	1	0	0	0	0	0
b8bf2052e1bcd3627a757249d553e228_rep;size=365;	x__sub0.01	x__sub0.01	x__sub0.01	x__sub0.01	x__sub0.01	x__sub0.01	x__sub0.01	8	0	0	0	6	0	0	0	4	0	0	0	10	0	0	0	5	0	0	0	5	0	0	0	4	0	0	0	1	0	0	0	1	0	0	0	1	0	0	0	0	0
6226ed44883ac17a00aa4630f4275c2e_rep;size=362;	x__sub0.01	x__sub0.01	x__sub0.01	x__sub0.01	x__sub0.01	x__sub0.01	x__sub0.01	0	0	0	1	0	3	3	3	0	1	1	3	0	0	2	0	0	0	0	0	0	0	2	1	1	0	1	1	0	0	1	1	0	0	0	1	0	2	1	1	0	0
1da433772c6903c18d907812d7c2a64c_rep;size=359;	x__sub0.01	x__sub0.01	x__sub0.01	x__sub0.01	x__sub0.01	x__sub0.01	x__sub0.01	2	0	0	1	2	0	0	0	2	0	0	0	9	0	0	0	12	0	0	1	7	0	0	0	1	0	0	0	14	1	0	0	2	0	0	0	7	0	0	0	10	0
351a6a9a86f27669de9aecf7e68ba728_rep;size=358;	x__sub0.01	x__sub0.01	x__sub0.01	x__sub0.01	x__sub0.01	x__sub0.01	x__sub0.01	20	0	0	0	14	0	0	0	13	0	0	0	6	0	0	0	6	0	0	0	12	0	0	0	14	0	0	0	20	0	1	0	7	0	0	0	7	0	0	0	12	0
97bec849223571f9e9b50c5d5f935a43_rep;size=356;	x__sub0.01	x__sub0.01	x__sub0.01	x__sub0.01	x__sub0.01	x__sub0.01	x__sub0.01	0	0	0	0	0	0	0	0	1	0	0	0	0	0	0	0	2	0	0	0	0	0	0	0	0	0	0	0	1	0	0	0	0	0	0	0	2	0	0	0	0	0
0a17248f175234a84eda9c36be91857c_rep;size=356;	x__sub0.01	x__sub0.01	x__sub0.01	x__sub0.01	x__sub0.01	x__sub0.01	x__sub0.01	0	0	0	0	0	0	0	0	0	0	0	0	0	0	0	0	0	0	0	0	0	0	0	0	0	0	0	0	0	0	0	0	0	0	0	0	0	0	0	0	0	0
32c8d14ae4afb7aee4ed5b2c64745395_rep;size=351;	x__sub0.01	x__sub0.01	x__sub0.01	x__sub0.01	x__sub0.01	x__sub0.01	x__sub0.01	1	0	1	0	3	0	0	0	4	0	0	0	0	0	1	0	8	0	0	0	2	0	0	0	5	0	0	0	8	0	0	0	6	0	0	0	1	0	0	0	2	0
7320892b1bac1bb2cec4092cfa981230_rep;size=349;	x__sub0.01	x__sub0.01	x__sub0.01	x__sub0.01	x__sub0.01	x__sub0.01	x__sub0.01	0	2	1	0	1	1	1	0	0	3	3	1	0	1	2	0	2	1	0	0	0	1	1	1	0	0	2	2	0	0	0	2	0	0	1	1	3	0	2	4	0	0
da0d833875440c9791e894c6aadf6ae4_rep;size=346;	x__sub0.01	x__sub0.01	x__sub0.01	x__sub0.01	x__sub0.01	x__sub0.01	x__sub0.01	0	0	0	0	0	2	0	0	0	0	0	0	0	0	0	0	0	0	0	0	0	0	0	0	0	0	0	1	0	0	1	1	0	0	0	0	0	0	0	0	0	1
9452aa736c46c2a8fdd8087843d35575_rep;size=344;	x__sub0.01	x__sub0.01	x__sub0.01	x__sub0.01	x__sub0.01	x__sub0.01	x__sub0.01	0	0	0	0	0	0	0	0	0	0	0	0	0	0	0	0	0	0	0	0	1	0	0	0	0	0	0	0	1	0	0	0	0	0	0	0	0	0	0	0	0	0
fe3836322f623a8953c261ef16eb5476_rep;size=344;	x__sub0.01	x__sub0.01	x__sub0.01	x__sub0.01	x__sub0.01	x__sub0.01	x__sub0.01	0	0	0	0	0	0	0	0	0	0	0	0	0	0	0	0	0	0	1	0	0	0	0	0	0	0	0	0	0	0	0	1	0	0	0	0	0	0	0	0	0	0
744ae441a6384223efc666307c0a4c91_rep;size=343;	x__sub0.01	x__sub0.01	x__sub0.01	x__sub0.01	x__sub0.01	x__sub0.01	x__sub0.01	0	0	0	0	0	0	0	0	0	0	0	0	0	0	0	1	0	0	1	1	0	0	0	0	0	0	1	1	0	0	0	1	0	0	2	0	0	0	0	1	0	0
098003ac9e4831c1017f5c1cd2409bcf_rep;size=340;	x__sub0.01	x__sub0.01	x__sub0.01	x__sub0.01	x__sub0.01	x__sub0.01	x__sub0.01	0	0	0	0	0	1	0	0	0	0	0	0	0	0	0	0	0	0	1	0	0	0	0	0	0	0	0	1	0	0	0	1	0	0	0	0	0	0	0	0	0	0
0a519461273dfe9553aa601a6c55c765_rep;size=338;	x__sub0.01	x__sub0.01	x__sub0.01	x__sub0.01	x__sub0.01	x__sub0.01	x__sub0.01	1	1	1	1	2	2	4	2	11	1	0	2	6	2	2	1	7	2	3	2	8	2	2	2	3	0	0	0	7	0	0	0	8	3	0	0	7	1	1	0	17	0
6db4360beb28b6aff702e5720506766d_rep;size=337;	x__sub0.01	x__sub0.01	x__sub0.01	x__sub0.01	x__sub0.01	x__sub0.01	x__sub0.01	0	0	0	0	0	0	0	0	3	0	0	0	3	0	0	0	36	0	0	0	9	0	0	0	0	0	0	0	1	0	0	0	3	0	0	0	3	0	0	0	4	0
7eabdc50dfd9a42b78364ba57f226c6b_rep;size=336;	x__sub0.01	x__sub0.01	x__sub0.01	x__sub0.01	x__sub0.01	x__sub0.01	x__sub0.01	0	0	0	0	0	0	0	0	0	0	0	0	0	0	0	0	0	0	0	0	0	0	0	0	0	0	0	0	8	0	0	0	0	0	0	0	0	0	0	0	0	0
1991338ad0b18f198a20e0f0421942a9_rep;size=335;	x__sub0.01	x__sub0.01	x__sub0.01	x__sub0.01	x__sub0.01	x__sub0.01	x__sub0.01	0	0	0	0	0	0	0	0	0	0	0	0	0	0	0	0	0	0	0	0	0	0	0	0	0	0	0	0	0	0	0	0	0	0	0	0	0	0	0	0	0	0
f8f21072103ce76796f918a608cd3de6_rep;size=330;	x__sub0.01	x__sub0.01	x__sub0.01	x__sub0.01	x__sub0.01	x__sub0.01	x__sub0.01	2	0	0	0	6	1	1	0	3	0	0	0	5	0	0	1	4	1	0	0	12	0	1	0	3	0	0	0	3	0	0	0	1	0	0	0	10	0	0	0	2	0
e34adda20d5b1719627c0b52db8b26af_rep;size=328;	x__sub0.01	x__sub0.01	x__sub0.01	x__sub0.01	x__sub0.01	x__sub0.01	x__sub0.01	0	1	5	4	0	4	10	7	0	1	4	2	0	4	9	7	0	1	6	12	0	0	4	4	0	0	1	7	0	2	1	2	0	3	3	3	0	2	4	4	0	2
03d7391cc0b22c99b94338990e766002_rep;size=324;	x__sub0.01	x__sub0.01	x__sub0.01	x__sub0.01	x__sub0.01	x__sub0.01	x__sub0.01	0	0	0	0	0	0	0	0	0	0	0	0	0	0	0	0	1	0	0	0	0	0	0	0	6	0	0	0	1	0	0	0	0	0	0	0	0	0	0	0	0	0
e47a4f52603f8f3287c657b0a0dfe459_rep;size=324;	x__sub0.01	x__sub0.01	x__sub0.01	x__sub0.01	x__sub0.01	x__sub0.01	x__sub0.01	0	0	0	1	0	0	0	0	0	0	0	0	0	0	0	0	0	0	0	0	0	0	0	1	0	0	0	0	0	0	0	0	0	0	1	0	0	0	0	0	0	0
e1da2bfccf4aa0aaf7286aa5e11a9772_rep;size=324;	x__sub0.01	x__sub0.01	x__sub0.01	x__sub0.01	x__sub0.01	x__sub0.01	x__sub0.01	0	0	0	0	0	0	0	0	0	0	0	1	0	0	0	0	0	0	0	0	0	0	0	0	0	0	0	0	0	0	0	0	0	0	0	0	0	0	0	0	0	0
7159249114dae1d7a76dc8183cbbb394_rep;size=323;	x__sub0.01	x__sub0.01	x__sub0.01	x__sub0.01	x__sub0.01	x__sub0.01	x__sub0.01	0	0	0	1	0	0	0	0	0	0	0	0	0	0	0	1	0	0	0	0	0	0	0	1	0	0	0	0	0	0	0	1	0	0	0	0	0	0	1	0	0	1
16584bc2bb6288d927f47516952e6b05_rep;size=323;	x__sub0.01	x__sub0.01	x__sub0.01	x__sub0.01	x__sub0.01	x__sub0.01	x__sub0.01	0	0	2	0	0	0	0	0	0	0	0	0	0	0	0	0	0	0	0	0	0	0	0	0	0	0	0	0	0	0	0	0	0	1	0	0	0	0	0	0	0	0
e6522de95347d8f7f81ae4458baff225_rep;size=322;	x__sub0.01	x__sub0.01	x__sub0.01	x__sub0.01	x__sub0.01	x__sub0.01	x__sub0.01	2	0	0	0	6	0	0	0	3	0	0	0	1	0	0	0	0	0	0	0	1	0	0	0	1	0	0	0	2	0	0	0	1	0	0	0	1	0	0	0	2	0
76e57f8d47ee7f5402f748e497525b5b_rep;size=322;	x__sub0.01	x__sub0.01	x__sub0.01	x__sub0.01	x__sub0.01	x__sub0.01	x__sub0.01	0	0	2	1	0	0	1	0	0	0	0	2	0	0	0	0	0	0	0	0	0	0	0	0	0	0	0	0	0	0	1	0	0	0	0	0	0	0	0	0	0	0
186ff1609059dc6959561f7e5bfb0498_rep;size=320;	x__sub0.01	x__sub0.01	x__sub0.01	x__sub0.01	x__sub0.01	x__sub0.01	x__sub0.01	0	1	0	0	6	1	0	0	3	0	2	0	2	0	1	0	5	0	0	0	4	2	0	1	0	0	0	1	1	0	0	0	0	0	0	0	0	1	0	0	3	0
f2b2f960039223c10c6b7e7a9eac2b62_rep;size=320;	x__sub0.01	x__sub0.01	x__sub0.01	x__sub0.01	x__sub0.01	x__sub0.01	x__sub0.01	7	1	0	0	12	0	0	1	8	0	0	0	13	0	0	0	8	0	1	0	19	1	0	2	3	0	0	1	14	0	0	0	4	1	0	0	36	1	1	2	15	1
e76fefd90d2b5d7f604b64173aceeb6a_rep;size=319;	x__sub0.01	x__sub0.01	x__sub0.01	x__sub0.01	x__sub0.01	x__sub0.01	x__sub0.01	7	0	0	0	18	1	0	0	12	0	0	0	9	0	0	0	10	0	0	0	15	0	0	0	10	0	0	0	9	0	0	0	9	0	0	0	16	0	0	0	8	0
4274910b659676162dd59fe0ce688a69_rep;size=319;	x__sub0.01	x__sub0.01	x__sub0.01	x__sub0.01	x__sub0.01	x__sub0.01	x__sub0.01	0	1	0	0	0	1	0	2	0	0	0	0	0	0	0	0	0	0	0	0	0	0	0	0	0	0	0	0	0	0	0	0	0	0	0	0	0	0	0	0	0	0
06f6ae0988d4344cd434412a735c7e69_rep;size=318;	x__sub0.01	x__sub0.01	x__sub0.01	x__sub0.01	x__sub0.01	x__sub0.01	x__sub0.01	0	0	0	0	0	0	0	0	0	0	0	0	0	0	0	0	0	0	0	0	2	0	0	0	0	0	0	0	0	0	0	0	0	0	0	0	0	0	0	0	0	0
e71cd658ec25fbe03bcf185eaf14c956_rep;size=318;	x__sub0.01	x__sub0.01	x__sub0.01	x__sub0.01	x__sub0.01	x__sub0.01	x__sub0.01	0	0	2	2	0	0	2	4	0	1	2	2	0	0	2	1	0	1	2	0	0	0	1	1	0	1	1	0	0	0	0	2	2	0	0	1	0	1	3	3	0	2
461945e8579d8e6b04208ffa219775a8_rep;size=316;	x__sub0.01	x__sub0.01	x__sub0.01	x__sub0.01	x__sub0.01	x__sub0.01	x__sub0.01	5	0	0	0	3	0	0	0	4	0	0	0	1	0	0	0	4	0	0	0	8	0	0	0	2	0	0	0	11	0	0	0	1	0	0	0	5	0	0	0	7	0
8c615e6c6a2647a0cfb248acb59b0538_rep;size=316;	x__sub0.01	x__sub0.01	x__sub0.01	x__sub0.01	x__sub0.01	x__sub0.01	x__sub0.01	0	0	0	0	10	0	0	0	4	0	0	0	25	0	0	0	61	0	0	0	2	0	0	0	6	0	0	0	12	1	0	0	6	0	0	0	9	0	0	0	1	0
65a898069ee56bd819ffc31dd9cbb594_rep;size=316;	x__sub0.01	x__sub0.01	x__sub0.01	x__sub0.01	x__sub0.01	x__sub0.01	x__sub0.01	0	0	0	0	0	0	1	0	0	0	0	0	0	0	0	0	0	0	1	0	0	0	0	0	0	0	0	0	0	0	1	0	0	1	0	0	0	0	0	0	0	0
102f3de195c7bcf73b5e6aa52b4ca9e9_rep;size=316;	x__sub0.01	x__sub0.01	x__sub0.01	x__sub0.01	x__sub0.01	x__sub0.01	x__sub0.01	0	2	0	0	0	0	0	0	0	0	0	0	0	0	0	0	0	0	0	0	0	0	0	0	0	0	0	0	0	0	0	2	0	0	0	0	0	0	0	0	0	0
de9aca4cd53ec40c2805af8f28a15809_rep;size=314;	x__sub0.01	x__sub0.01	x__sub0.01	x__sub0.01	x__sub0.01	x__sub0.01	x__sub0.01	7	0	0	0	0	0	0	0	0	0	0	0	11	0	0	0	5	0	0	0	2	0	0	0	1	0	0	0	0	0	0	0	5	0	0	0	2	0	0	0	2	0
63ee20bf138fdb4dd5f53bb5795447b3_rep;size=314;	x__sub0.01	x__sub0.01	x__sub0.01	x__sub0.01	x__sub0.01	x__sub0.01	x__sub0.01	0	0	0	0	0	0	0	0	0	0	0	1	0	0	0	0	0	0	0	0	0	0	0	0	0	1	0	0	0	0	0	0	0	0	0	0	0	0	0	0	0	0
c21245c606dca666c50d045db9de7dd7_rep;size=312;	x__sub0.01	x__sub0.01	x__sub0.01	x__sub0.01	x__sub0.01	x__sub0.01	x__sub0.01	2	0	0	0	2	0	0	0	2	0	0	0	1	0	0	0	2	0	0	0	8	0	0	0	1	0	0	0	3	0	0	0	6	0	0	0	6	0	0	0	3	0
3572595fc1d50d44bdaf4c1a7ba36198_rep;size=311;	x__sub0.01	x__sub0.01	x__sub0.01	x__sub0.01	x__sub0.01	x__sub0.01	x__sub0.01	0	0	1	0	0	0	0	0	0	0	1	0	0	3	1	4	1	0	1	1	0	0	0	0	2	0	1	5	0	1	0	1	0	1	1	0	0	0	0	2	0	0
6f570a0c6f60c982eec2c6f7cd21c57e_rep;size=310;	x__sub0.01	x__sub0.01	x__sub0.01	x__sub0.01	x__sub0.01	x__sub0.01	x__sub0.01	0	1	0	0	0	0	0	1	0	0	0	0	0	0	0	0	0	0	0	0	0	0	0	0	0	0	0	0	0	0	0	1	0	0	0	0	0	0	0	0	0	0
a44cc10bba7662f390af1f09789a22d6_rep;size=305;	x__sub0.01	x__sub0.01	x__sub0.01	x__sub0.01	x__sub0.01	x__sub0.01	x__sub0.01	8	0	0	0	6	0	0	0	6	0	0	0	6	0	0	0	8	0	0	0	6	0	0	0	2	0	0	0	6	0	0	0	6	0	0	0	0	0	0	0	0	0
a8e3c8fe4d171d92ed870093b646ab09_rep;size=304;	x__sub0.01	x__sub0.01	x__sub0.01	x__sub0.01	x__sub0.01	x__sub0.01	x__sub0.01	1	0	0	2	0	1	1	0	0	2	1	0	0	1	4	5	1	0	1	3	1	0	1	4	0	0	3	3	0	0	0	1	2	3	2	3	1	0	1	5	3	0
acdbbbd07cc76b52a6bbf63be08f18f2_rep;size=302;	x__sub0.01	x__sub0.01	x__sub0.01	x__sub0.01	x__sub0.01	x__sub0.01	x__sub0.01	4	0	0	0	9	0	0	0	9	0	0	0	11	0	0	0	10	0	0	0	9	0	0	0	3	0	0	0	10	0	0	0	4	0	0	0	15	0	0	0	6	0
26e4fd31c4c61a71d3b0d17ba8421fa8_rep;size=301;	x__sub0.01	x__sub0.01	x__sub0.01	x__sub0.01	x__sub0.01	x__sub0.01	x__sub0.01	0	0	0	0	0	0	1	0	0	0	0	0	0	0	0	0	0	0	0	0	0	0	0	0	0	0	0	0	0	0	0	0	0	0	0	0	0	0	0	0	0	0
a456a10b6f4e62f2ce00785d86a85fd3_rep;size=301;	x__sub0.01	x__sub0.01	x__sub0.01	x__sub0.01	x__sub0.01	x__sub0.01	x__sub0.01	0	0	0	0	0	0	0	0	0	0	0	0	0	0	0	0	0	0	0	0	0	0	0	0	0	0	0	0	0	0	0	0	0	0	0	0	0	0	0	0	0	0
880d71b18f351b449366f01df8d05d18_rep;size=300;	x__sub0.01	x__sub0.01	x__sub0.01	x__sub0.01	x__sub0.01	x__sub0.01	x__sub0.01	0	0	0	0	0	0	0	1	0	0	0	1	0	0	0	0	0	0	0	0	0	0	0	1	0	0	0	1	0	0	0	0	0	0	0	1	0	0	0	0	0	0
35d3325bbdceae1b1846e2370df1ee42_rep;size=300;	x__sub0.01	x__sub0.01	x__sub0.01	x__sub0.01	x__sub0.01	x__sub0.01	x__sub0.01	0	1	0	0	0	0	0	0	0	0	0	1	0	1	0	0	0	0	0	0	0	0	0	0	0	1	0	0	0	0	0	0	0	0	0	0	0	0	0	0	0	0
50d635ec6daeb4827a460c5a5916c332_rep;size=298;	x__sub0.01	x__sub0.01	x__sub0.01	x__sub0.01	x__sub0.01	x__sub0.01	x__sub0.01	0	0	0	0	0	0	0	0	2	0	0	0	4	0	0	0	2	0	0	0	0	0	0	0	0	0	0	0	5	0	0	0	1	0	0	0	27	0	0	0	0	0
4a538eaf438e7924ab968e6ffbddf9a5_rep;size=298;	x__sub0.01	x__sub0.01	x__sub0.01	x__sub0.01	x__sub0.01	x__sub0.01	x__sub0.01	0	0	1	1	0	0	0	1	0	0	0	0	0	0	0	0	0	0	0	0	0	0	0	0	0	0	0	0	0	0	0	1	0	0	0	0	0	0	0	0	0	0
0c1757bd253c1fc6382920646a248d54_rep;size=284;	x__sub0.01	x__sub0.01	x__sub0.01	x__sub0.01	x__sub0.01	x__sub0.01	x__sub0.01	0	0	0	0	0	0	0	0	3	0	0	0	0	0	0	0	0	0	0	0	37	0	0	0	1	0	0	0	63	0	0	0	0	0	0	0	30	0	0	0	0	0
c8d5ca2a7960ceb44615d8c57c0b5e6b_rep;size=279;	x__sub0.01	x__sub0.01	x__sub0.01	x__sub0.01	x__sub0.01	x__sub0.01	x__sub0.01	1	0	0	0	0	0	2	0	0	1	0	3	0	0	0	0	0	0	0	0	0	1	0	0	0	0	0	1	1	0	0	0	1	0	0	1	0	0	0	0	0	0
1f6e3761816bae678d4838f429efa4a2_rep;size=277;	x__sub0.01	x__sub0.01	x__sub0.01	x__sub0.01	x__sub0.01	x__sub0.01	x__sub0.01	1	0	0	0	2	0	0	0	0	0	0	0	0	0	0	0	0	0	0	0	0	0	0	0	0	0	0	0	0	0	0	0	0	0	0	0	1	0	0	0	6	0
3c0b8eee5ec68dae48cf0f1d5815434d_rep;size=275;	x__sub0.01	x__sub0.01	x__sub0.01	x__sub0.01	x__sub0.01	x__sub0.01	x__sub0.01	5	0	0	0	3	0	0	0	0	0	0	0	0	0	0	0	0	0	0	0	0	0	0	0	0	0	0	0	1	0	0	0	0	0	0	0	2	0	0	0	0	0
752261c8dd1e2d08bf74b23bb2dc83b3_rep;size=274;	x__sub0.01	x__sub0.01	x__sub0.01	x__sub0.01	x__sub0.01	x__sub0.01	x__sub0.01	0	0	0	0	0	0	0	0	0	0	0	0	0	0	0	0	4	0	0	0	2	0	0	0	0	0	0	0	2	0	0	0	0	0	0	0	0	0	0	0	0	0
2af74a21b1160f65cdf3c6ff1155994b_rep;size=272;	x__sub0.01	x__sub0.01	x__sub0.01	x__sub0.01	x__sub0.01	x__sub0.01	x__sub0.01	0	0	1	0	0	1	0	1	0	0	0	0	0	0	0	0	0	0	0	0	0	0	0	0	0	0	0	0	0	0	0	1	0	0	0	0	0	0	0	0	0	0
6768fd19c828ae5f1bc17c18e7e89fa4_rep;size=271;	x__sub0.01	x__sub0.01	x__sub0.01	x__sub0.01	x__sub0.01	x__sub0.01	x__sub0.01	2	0	1	0	2	0	0	0	6	0	0	0	1	0	0	0	3	0	0	0	4	0	0	0	4	0	0	0	4	0	0	0	5	0	0	0	5	0	0	0	5	0
10048fbba12c572134ffe2e668114e83_rep;size=270;	x__sub0.01	x__sub0.01	x__sub0.01	x__sub0.01	x__sub0.01	x__sub0.01	x__sub0.01	0	0	2	0	0	0	0	1	0	0	0	0	0	0	0	0	0	0	0	0	0	0	0	0	0	0	0	1	0	0	0	0	0	0	1	0	0	1	0	0	0	0
a31f3233efcefb59448c59f5be4ebf2f_rep;size=269;	x__sub0.01	x__sub0.01	x__sub0.01	x__sub0.01	x__sub0.01	x__sub0.01	x__sub0.01	0	0	1	0	0	1	3	1	0	0	1	0	0	0	0	0	0	0	0	2	0	0	1	2	0	0	1	2	0	0	0	3	0	0	1	0	0	0	0	0	0	0
4fa7a67b3526b16a7cce8ca54add6714_rep;size=266;	x__sub0.01	x__sub0.01	x__sub0.01	x__sub0.01	x__sub0.01	x__sub0.01	x__sub0.01	6	0	0	0	0	0	0	0	16	0	0	0	3	0	0	0	0	0	0	0	6	0	0	0	0	0	0	0	5	0	0	0	2	0	0	0	0	0	0	0	3	0
7078fb3d52f4db5efd963c6d6c10f2e1_rep;size=265;	x__primer_dimer	x__primer_dimer	x__primer_dimer	x__primer_dimer	x__primer_dimer	x__primer_dimer	x__primer_dimer	0	0	0	0	3	0	0	0	0	0	0	0	0	0	0	0	0	0	0	0	0	0	0	0	0	0	0	0	0	0	0	0	0	0	0	0	0	0	0	0	0	0
72d7d05352532e1b3df0b17df4788831_rep;size=262;	x__sub0.01	x__sub0.01	x__sub0.01	x__sub0.01	x__sub0.01	x__sub0.01	x__sub0.01	0	0	0	0	0	0	0	0	0	0	0	0	0	0	0	0	0	0	0	0	0	0	0	0	0	0	0	0	0	0	0	0	0	0	0	0	0	0	0	0	0	0
b397647a15d923bbbda9e8d762588c70_rep;size=262;	x__sub0.01	x__sub0.01	x__sub0.01	x__sub0.01	x__sub0.01	x__sub0.01	x__sub0.01	0	0	2	3	0	1	4	1	0	0	1	2	1	0	0	1	0	0	1	0	1	1	0	1	0	0	1	2	0	0	0	2	0	0	1	0	0	2	0	3	0	0
0ddf1d9ed1d901943315de5b485a61df_rep;size=261;	x__sub0.01	x__sub0.01	x__sub0.01	x__sub0.01	x__sub0.01	x__sub0.01	x__sub0.01	0	0	0	0	1	0	0	0	0	0	0	0	0	0	0	0	0	0	0	0	0	0	0	0	0	0	0	0	0	0	0	1	0	0	0	0	2	0	0	0	0	0
c959e53f291f953a3cd3c10693115afb_rep;size=260;	x__sub0.01	x__sub0.01	x__sub0.01	x__sub0.01	x__sub0.01	x__sub0.01	x__sub0.01	0	0	0	1	0	0	0	0	0	0	0	1	0	0	0	0	0	0	0	0	0	0	0	0	0	0	0	0	0	1	0	0	0	0	0	0	0	0	0	0	0	0
a98b5b9a12237fabadd02e315343f669_rep;size=257;	x__sub0.01	x__sub0.01	x__sub0.01	x__sub0.01	x__sub0.01	x__sub0.01	x__sub0.01	6	1	0	0	14	2	0	0	10	0	1	0	8	0	0	0	8	0	2	0	6	0	0	0	1	1	0	0	15	0	0	0	6	0	0	0	15	0	0	0	3	0
4f63064aea3fa9e60ef04206c2166bcc_rep;size=256;	x__sub0.01	x__sub0.01	x__sub0.01	x__sub0.01	x__sub0.01	x__sub0.01	x__sub0.01	2	0	0	0	8	0	0	0	2	0	0	0	4	0	0	0	9	0	0	0	1	0	0	0	1	0	0	0	2	0	0	0	1	0	0	0	3	0	0	0	2	1
2c5b51945a2030e3f6f9a5ded04e66ec_rep;size=255;	x__sub0.01	x__sub0.01	x__sub0.01	x__sub0.01	x__sub0.01	x__sub0.01	x__sub0.01	0	1	3	1	0	1	6	1	0	1	1	3	0	0	0	3	0	0	0	2	0	0	1	0	0	0	2	2	0	0	1	4	2	0	4	0	0	2	1	0	0	0
0dbfa0149c679dd503d3f06da1fab265_rep;size=255;	x__sub0.01	x__sub0.01	x__sub0.01	x__sub0.01	x__sub0.01	x__sub0.01	x__sub0.01	0	0	0	0	0	0	0	0	0	0	0	0	0	0	1	0	0	0	0	0	0	0	0	0	0	0	0	0	0	0	0	0	0	0	0	0	0	0	0	0	0	0
2c18ac9df2606a5afb6b4b1b51856998_rep;size=250;	x__sub0.01	x__sub0.01	x__sub0.01	x__sub0.01	x__sub0.01	x__sub0.01	x__sub0.01	0	2	1	0	0	4	2	0	0	3	2	0	1	0	0	5	1	1	2	0	2	1	3	0	0	6	3	8	1	7	2	5	0	4	2	6	0	4	2	1	0	2
3e27502937ba33d444c7b142dfa432e6_rep;size=250;	x__sub0.01	x__sub0.01	x__sub0.01	x__sub0.01	x__sub0.01	x__sub0.01	x__sub0.01	0	0	0	0	0	0	1	1	0	0	1	1	0	0	0	0	0	0	0	1	0	0	0	0	0	0	1	0	0	0	0	1	0	0	0	0	0	0	0	0	0	0
dae0e167dc92822b40f0f376f7775b9f_rep;size=248;	x__sub0.01	x__sub0.01	x__sub0.01	x__sub0.01	x__sub0.01	x__sub0.01	x__sub0.01	9	0	0	0	5	0	0	0	8	0	0	0	7	0	0	0	10	0	0	0	12	0	0	0	9	0	0	0	4	0	0	0	5	0	0	0	4	0	0	0	7	0
1bdc91560fe99d93e6aca9d381b0281b_rep;size=248;	x__sub0.01	x__sub0.01	x__sub0.01	x__sub0.01	x__sub0.01	x__sub0.01	x__sub0.01	12	0	0	0	1	0	0	0	5	0	0	0	2	0	0	0	20	0	0	0	7	0	0	0	8	0	0	0	0	0	0	0	4	0	0	0	8	0	0	0	0	0
504e87a0ba6d9967f0e6fd47bbde9ef7_rep;size=247;	x__sub0.01	x__sub0.01	x__sub0.01	x__sub0.01	x__sub0.01	x__sub0.01	x__sub0.01	5	0	0	0	4	0	0	0	3	0	0	0	1	0	0	0	6	0	0	0	18	0	0	0	2	0	0	0	2	0	0	0	4	0	0	0	6	0	0	0	7	0
5dd521d90d0ab8f081da76ab853bb105_rep;size=246;	x__sub0.01	x__sub0.01	x__sub0.01	x__sub0.01	x__sub0.01	x__sub0.01	x__sub0.01	0	0	0	0	0	0	0	0	1	0	0	0	0	0	0	0	0	0	0	0	5	0	0	0	0	0	0	0	0	0	0	0	0	0	0	0	1	0	0	0	0	0
8d78f1c6dfcc49ba735f98bb0128d7c1_rep;size=244;	x__sub0.01	x__sub0.01	x__sub0.01	x__sub0.01	x__sub0.01	x__sub0.01	x__sub0.01	0	0	0	1	0	0	1	0	0	0	1	0	0	0	0	0	0	0	0	0	0	0	2	0	0	0	0	1	0	0	0	0	0	0	0	1	0	0	0	1	0	0
d9320e356c763b5c65a3e12c2d6ebc43_rep;size=242;	x__sub0.01	x__sub0.01	x__sub0.01	x__sub0.01	x__sub0.01	x__sub0.01	x__sub0.01	0	0	0	0	0	0	0	0	0	0	0	0	0	0	0	0	0	0	0	0	0	0	0	0	0	0	0	0	0	0	0	0	0	0	0	0	0	0	0	0	0	0
b5952a0bb74b4bba85c1676795fb4d1d_rep;size=241;	x__sub0.01	x__sub0.01	x__sub0.01	x__sub0.01	x__sub0.01	x__sub0.01	x__sub0.01	1	0	0	1	0	0	0	1	0	0	1	2	0	0	0	0	0	0	0	0	0	0	0	0	0	0	0	1	0	0	0	0	0	0	1	0	0	0	0	0	0	0
d4fc0fb5342ebf380472cc0573472ce5_rep;size=238;	x__sub0.01	x__sub0.01	x__sub0.01	x__sub0.01	x__sub0.01	x__sub0.01	x__sub0.01	0	0	0	0	1	0	2	0	0	1	2	0	2	3	4	2	20	0	0	1	0	2	1	2	0	0	0	0	7	1	0	0	43	0	0	0	15	0	0	0	32	0
77868bbef65417230ec62bf0c56b499f_rep;size=236;	x__sub0.01	x__sub0.01	x__sub0.01	x__sub0.01	x__sub0.01	x__sub0.01	x__sub0.01	14	2	2	3	91	1	2	1	2	0	1	1	4	5	0	1	2	0	1	3	2	5	2	2	0	1	0	0	2	1	0	0	4	0	0	0	1	2	0	2	3	0
2671a7bb1fd0a6b04abf7b3378250f44_rep;size=233;	x__sub0.01	x__sub0.01	x__sub0.01	x__sub0.01	x__sub0.01	x__sub0.01	x__sub0.01	0	0	0	0	0	0	0	0	0	0	0	0	0	0	0	0	0	0	0	0	0	0	0	0	0	0	0	0	0	0	0	0	0	0	0	0	0	0	0	0	0	0
84a447f558f28b15446ec5e868016f37_rep;size=229;	x__sub0.01	x__sub0.01	x__sub0.01	x__sub0.01	x__sub0.01	x__sub0.01	x__sub0.01	1	0	0	0	6	0	0	0	3	0	0	0	2	0	0	0	0	0	0	0	0	0	0	0	0	0	0	0	0	0	0	0	3	0	0	0	3	0	0	0	4	0
0b039997fac883673659c503c3c86203_rep;size=229;	x__sub0.01	x__sub0.01	x__sub0.01	x__sub0.01	x__sub0.01	x__sub0.01	x__sub0.01	3	0	0	0	1	0	0	0	10	0	0	1	3	0	0	0	5	0	0	0	5	0	0	0	1	0	0	0	2	0	0	0	4	0	0	0	1	0	0	0	3	0
791b2c74bb2660a014472dcd9a0c2b6a_rep;size=229;	x__sub0.01	x__sub0.01	x__sub0.01	x__sub0.01	x__sub0.01	x__sub0.01	x__sub0.01	2	0	0	0	2	0	0	0	3	0	0	0	11	0	0	1	5	0	0	0	3	0	0	0	2	0	0	0	3	0	0	0	6	0	0	0	49	0	0	0	1	0
7262ad4b2ddb778ad389baf1fcc92e08_rep;size=228;	x__sub0.01	x__sub0.01	x__sub0.01	x__sub0.01	x__sub0.01	x__sub0.01	x__sub0.01	0	0	1	0	0	0	0	0	0	0	0	0	0	0	0	0	0	0	0	0	0	0	0	0	0	0	0	0	0	0	0	1	0	0	0	0	0	0	0	0	0	0
041825dec07868f744bffee8725478bb_rep;size=227;	x__sub0.01	x__sub0.01	x__sub0.01	x__sub0.01	x__sub0.01	x__sub0.01	x__sub0.01	0	0	0	0	0	0	0	0	0	0	0	0	0	0	0	0	0	0	0	0	0	0	0	0	0	0	0	0	0	0	0	0	0	0	0	0	0	0	0	0	0	0
e8ed2e220065f6918752a5aa364e8a94_rep;size=226;	x__sub0.01	x__sub0.01	x__sub0.01	x__sub0.01	x__sub0.01	x__sub0.01	x__sub0.01	0	0	0	0	0	0	0	0	2	0	0	0	0	0	0	0	0	0	0	0	0	0	0	0	0	0	0	0	0	0	0	0	0	0	0	0	0	0	0	0	0	0
036ac9ac22ce0438d75daf5d371b5e60_rep;size=221;	x__sub0.01	x__sub0.01	x__sub0.01	x__sub0.01	x__sub0.01	x__sub0.01	x__sub0.01	3	0	0	0	1	0	0	0	6	0	0	0	4	0	0	0	1	0	0	0	6	0	0	0	2	0	0	0	5	0	0	0	1	0	0	0	5	0	0	0	18	0
8ab2ce377726f81d4c0f6b2c191e5207_rep;size=221;	x__sub0.01	x__sub0.01	x__sub0.01	x__sub0.01	x__sub0.01	x__sub0.01	x__sub0.01	0	1	3	0	0	0	1	0	0	1	0	1	0	0	2	1	0	0	0	0	0	0	0	0	0	0	0	1	0	0	1	0	0	0	0	1	0	0	0	0	0	2
c2d95d2c2eb94b30152647ba9c11334c_rep;size=221;	x__sub0.01	x__sub0.01	x__sub0.01	x__sub0.01	x__sub0.01	x__sub0.01	x__sub0.01	0	3	2	2	0	1	0	5	0	1	2	1	0	1	1	0	0	0	1	2	0	0	0	6	0	0	1	2	0	0	0	2	0	1	0	2	0	0	2	6	0	1
3724522f9b3dfecc4af80640a0cdf3b3_rep;size=220;	x__sub0.01	x__sub0.01	x__sub0.01	x__sub0.01	x__sub0.01	x__sub0.01	x__sub0.01	0	0	0	0	1	0	0	0	0	0	0	0	1	0	0	0	2	0	0	0	0	0	0	0	0	0	0	0	0	0	0	0	0	0	0	0	0	0	0	0	0	0
b0521d2bea7c51c4f00cf8343624beaa_rep;size=215;	x__sub0.01	x__sub0.01	x__sub0.01	x__sub0.01	x__sub0.01	x__sub0.01	x__sub0.01	0	1	1	2	0	1	1	2	0	1	3	1	2	0	0	2	0	0	1	2	0	0	1	0	0	0	1	3	0	0	1	0	0	0	0	2	1	0	1	0	1	0
706d247794f7b0cf619dc0262b8dc263_rep;size=215;	x__sub0.01	x__sub0.01	x__sub0.01	x__sub0.01	x__sub0.01	x__sub0.01	x__sub0.01	1	0	0	0	6	0	0	0	2	0	0	0	7	0	0	0	29	0	0	0	1	0	0	0	1	0	0	0	0	0	0	0	3	0	0	0	0	0	0	0	0	0
21695cb81a3173820f091501214ff626_rep;size=212;	x__sub0.01	x__sub0.01	x__sub0.01	x__sub0.01	x__sub0.01	x__sub0.01	x__sub0.01	0	0	0	0	0	1	0	0	0	0	1	0	0	1	0	0	0	0	0	0	0	0	0	0	0	0	0	0	0	0	0	1	0	0	0	0	0	0	0	0	0	0
318d866d16cce626299b840d360443e7_rep;size=211;	x__sub0.01	x__sub0.01	x__sub0.01	x__sub0.01	x__sub0.01	x__sub0.01	x__sub0.01	2	0	0	0	7	0	0	0	3	0	0	0	4	0	0	0	0	0	0	0	2	0	0	0	4	0	0	0	6	0	0	0	8	0	0	0	2	0	0	0	3	0
13ecc214fe8d2a8747517a9f38cdd6fb_rep;size=211;	x__sub0.01	x__sub0.01	x__sub0.01	x__sub0.01	x__sub0.01	x__sub0.01	x__sub0.01	1	0	0	0	1	0	0	0	0	0	0	0	3	0	0	0	1	0	0	0	1	0	0	0	1	0	0	0	2	0	0	0	0	0	0	0	3	0	0	0	0	0
08928126267663fea7c92ac94b10378a_rep;size=211;	x__sub0.01	x__sub0.01	x__sub0.01	x__sub0.01	x__sub0.01	x__sub0.01	x__sub0.01	0	0	0	0	3	0	0	0	5	0	0	0	8	0	0	0	2	0	0	0	2	0	0	0	2	0	0	0	7	0	0	0	2	0	0	0	5	0	0	0	2	0
c0ec02aa41657df299c3c88ba0737d57_rep;size=209;	x__sub0.01	x__sub0.01	x__sub0.01	x__sub0.01	x__sub0.01	x__sub0.01	x__sub0.01	3	0	0	0	5	0	0	0	1	0	0	0	8	0	0	0	3	0	0	0	4	0	0	0	1	0	0	0	9	0	0	0	5	0	0	0	4	0	0	0	4	0
b993c4d6448d0387ecb2456b5a5749c0_rep;size=209;	x__sub0.01	x__sub0.01	x__sub0.01	x__sub0.01	x__sub0.01	x__sub0.01	x__sub0.01	1	2	0	0	0	0	1	0	1	0	2	0	6	0	1	0	8	0	0	0	10	2	0	1	2	0	0	3	3	0	1	0	0	1	0	0	1	0	0	0	1	0
09b092c71478dba9ab1a4d2cacf128b0_rep;size=208;	x__sub0.01	x__sub0.01	x__sub0.01	x__sub0.01	x__sub0.01	x__sub0.01	x__sub0.01	0	0	0	0	7	0	0	0	5	0	0	0	8	0	0	0	10	0	0	0	4	0	0	0	3	0	0	0	4	0	0	0	6	0	0	0	20	0	0	0	7	0
fa3039e29cdb2ba0cc387091ae641575_rep;size=208;	x__sub0.01	x__sub0.01	x__sub0.01	x__sub0.01	x__sub0.01	x__sub0.01	x__sub0.01	0	0	0	0	0	0	0	0	0	1	0	0	0	0	0	0	0	0	0	0	0	0	0	0	0	0	0	0	0	0	0	0	0	0	0	0	0	0	0	2	0	0
31d60bce2ffc264b5f933b8cd475c13a_rep;size=207;	x__sub0.01	x__sub0.01	x__sub0.01	x__sub0.01	x__sub0.01	x__sub0.01	x__sub0.01	0	2	0	0	3	0	0	0	2	1	0	0	2	0	3	0	12	2	3	3	5	0	2	0	2	0	0	0	10	0	0	0	7	1	0	1	13	1	0	0	13	1
4cc602d2abbdf145fbdf32f82798b1d2_rep;size=207;	x__sub0.01	x__sub0.01	x__sub0.01	x__sub0.01	x__sub0.01	x__sub0.01	x__sub0.01	0	0	0	0	2	0	0	0	4	0	0	0	1	0	0	0	4	0	0	0	3	0	0	0	3	0	0	0	8	0	0	0	1	0	0	0	3	0	0	0	1	0
4ef4492e8d3b0e01198f9b0f60e0bde7_rep;size=204;	x__sub0.01	x__sub0.01	x__sub0.01	x__sub0.01	x__sub0.01	x__sub0.01	x__sub0.01	6	0	0	0	1	0	0	0	8	0	0	0	12	0	0	0	1	0	0	0	4	0	0	0	2	0	0	0	5	0	0	0	3	0	0	0	4	0	0	0	4	0
181e750611a49d362a33ff436b73c3b9_rep;size=201;	x__sub0.01	x__sub0.01	x__sub0.01	x__sub0.01	x__sub0.01	x__sub0.01	x__sub0.01	0	0	0	0	0	0	0	0	1	0	0	0	2	0	0	0	2	0	0	0	2	0	0	0	0	0	0	0	1	0	0	0	1	0	0	0	0	0	1	0	0	0
2f515dc129f3716fdb330e47a26faec0_rep;size=201;	x__sub0.01	x__sub0.01	x__sub0.01	x__sub0.01	x__sub0.01	x__sub0.01	x__sub0.01	0	0	0	0	0	0	0	0	0	0	0	0	0	0	1	0	0	0	0	0	0	0	0	0	0	0	0	0	0	0	0	0	0	0	0	0	0	0	0	0	0	0
03e220c78d99576e905eb961c1fe9b4f_rep;size=200;	x__sub0.01	x__sub0.01	x__sub0.01	x__sub0.01	x__sub0.01	x__sub0.01	x__sub0.01	0	0	0	0	1	0	0	0	2	0	0	0	1	0	0	0	1	0	0	0	0	0	0	0	0	0	0	0	1	0	0	0	0	0	0	0	4	0	0	0	1	0
c12db502a4da0a64b7d72a75f221a57d_rep;size=199;	x__sub0.01	x__sub0.01	x__sub0.01	x__sub0.01	x__sub0.01	x__sub0.01	x__sub0.01	0	0	0	0	0	0	0	0	0	0	0	0	0	0	0	0	1	0	0	0	0	0	0	0	0	0	0	0	15	0	0	0	0	0	0	0	0	0	0	0	0	0
ca5aca47d0c9c4e766c1465802ed44ce_rep;size=198;	x__sub0.01	x__sub0.01	x__sub0.01	x__sub0.01	x__sub0.01	x__sub0.01	x__sub0.01	0	0	2	0	0	1	1	0	0	2	0	0	0	0	0	0	0	0	0	0	0	0	0	0	0	0	0	0	0	0	0	1	0	0	0	1	0	0	0	0	0	0
1b2a6caf508630ea1c95302205fb01b3_rep;size=198;	x__sub0.01	x__sub0.01	x__sub0.01	x__sub0.01	x__sub0.01	x__sub0.01	x__sub0.01	0	0	0	0	0	0	0	0	0	0	0	0	0	0	0	0	0	0	0	0	0	0	0	0	0	0	0	0	0	1	0	0	0	0	0	0	0	0	0	0	0	0
025e26e78e188cd84ea51598bc705f28_rep;size=195;	x__sub0.01	x__sub0.01	x__sub0.01	x__sub0.01	x__sub0.01	x__sub0.01	x__sub0.01	0	0	0	0	0	0	0	0	0	0	0	0	0	0	0	0	0	0	0	0	0	0	0	0	0	0	0	0	0	0	0	0	0	0	0	0	0	0	0	0	0	0
7b8b7342f6d117badad0733d9bd40ce6_rep;size=194;	x__sub0.01	x__sub0.01	x__sub0.01	x__sub0.01	x__sub0.01	x__sub0.01	x__sub0.01	0	0	0	0	0	0	0	0	0	1	0	0	0	0	0	0	0	0	0	0	0	0	0	0	0	0	0	0	0	0	0	1	0	0	0	0	0	0	0	0	0	0
e3cf825357f981eff11c1a319d7a9ff8_rep;size=193;	x__sub0.01	x__sub0.01	x__sub0.01	x__sub0.01	x__sub0.01	x__sub0.01	x__sub0.01	0	0	0	0	0	0	0	0	0	0	0	0	0	0	0	0	4	0	0	0	1	0	0	0	0	0	0	0	1	0	0	0	0	0	0	0	2	0	0	0	3	0
5aff7f937d2596d0aceed5277b239abb_rep;size=193;	x__sub0.01	x__sub0.01	x__sub0.01	x__sub0.01	x__sub0.01	x__sub0.01	x__sub0.01	0	0	0	0	0	0	0	0	0	0	0	0	0	0	0	0	0	0	0	0	0	1	0	0	0	0	0	0	0	0	0	0	0	0	0	0	0	0	0	0	0	0
f736d0aad0b733dea0839d9a065bbbc6_rep;size=193;	x__sub0.01	x__sub0.01	x__sub0.01	x__sub0.01	x__sub0.01	x__sub0.01	x__sub0.01	0	0	0	1	0	0	0	0	0	0	0	0	0	0	0	0	0	0	0	0	0	0	0	0	0	0	0	2	0	0	0	0	0	0	0	0	0	0	0	0	0	0
87f21162581c31c018941d10ac81fca3_rep;size=192;	x__sub0.01	x__sub0.01	x__sub0.01	x__sub0.01	x__sub0.01	x__sub0.01	x__sub0.01	8	0	0	0	4	0	0	0	2	0	0	0	5	0	0	0	4	0	0	0	2	0	0	0	0	0	0	0	2	0	0	0	2	0	0	0	4	0	0	0	10	0
d37e4d8d2172892460c7158331a0ee06_rep;size=192;	x__sub0.01	x__sub0.01	x__sub0.01	x__sub0.01	x__sub0.01	x__sub0.01	x__sub0.01	0	0	0	0	1	0	0	0	0	0	0	0	0	0	0	0	2	0	0	0	7	0	0	0	1	0	0	0	2	0	0	0	1	0	0	0	23	0	0	0	0	0
6cc51d297bf260b0e4e248234848d31f_rep;size=191;	x__sub0.01	x__sub0.01	x__sub0.01	x__sub0.01	x__sub0.01	x__sub0.01	x__sub0.01	0	1	0	0	1	1	0	0	0	1	0	0	4	0	0	0	1	0	0	0	0	0	0	0	2	0	0	0	3	0	0	0	0	0	0	0	4	1	0	1	1	0
7babb7d1ffb6df4d3c638138d963f79d_rep;size=190;	x__sub0.01	x__sub0.01	x__sub0.01	x__sub0.01	x__sub0.01	x__sub0.01	x__sub0.01	0	4	6	2	0	4	4	4	0	7	3	4	0	0	10	4	0	4	6	6	0	4	6	11	0	1	6	5	0	2	0	2	3	2	5	1	0	1	2	3	0	1
a10c2c9aab549d2d98bd9a75010f1615_rep;size=190;	x__sub0.01	x__sub0.01	x__sub0.01	x__sub0.01	x__sub0.01	x__sub0.01	x__sub0.01	0	1	0	0	0	0	2	0	0	0	0	1	0	0	0	0	1	0	0	0	1	0	0	0	0	0	0	0	0	0	0	0	0	0	0	2	0	0	0	0	0	0
4d7d23228586b9ce0fcf2b1212adff60_rep;size=190;	x__sub0.01	x__sub0.01	x__sub0.01	x__sub0.01	x__sub0.01	x__sub0.01	x__sub0.01	2	0	1	0	25	0	0	0	0	0	0	0	3	0	0	0	1	0	0	0	7	0	0	0	0	0	0	0	48	0	0	0	0	0	0	0	0	1	0	0	1	0
2a3d52afed22d0839018930808db311b_rep;size=189;	x__sub0.01	x__sub0.01	x__sub0.01	x__sub0.01	x__sub0.01	x__sub0.01	x__sub0.01	0	3	1	0	0	3	0	0	1	3	1	3	1	6	22	8	1	3	8	13	0	0	4	4	0	1	8	9	0	1	5	6	0	1	4	6	0	2	0	4	2	2
4c231eaabd60089919610e5c4fd320fd_rep;size=189;	x__sub0.01	x__sub0.01	x__sub0.01	x__sub0.01	x__sub0.01	x__sub0.01	x__sub0.01	0	0	0	0	0	1	0	0	0	0	0	1	0	0	0	0	0	0	0	0	0	0	0	0	0	0	0	0	0	0	0	0	0	0	0	0	0	0	0	0	0	0
4132378f279bbaf2e95027a10ad33944_rep;size=186;	x__sub0.01	x__sub0.01	x__sub0.01	x__sub0.01	x__sub0.01	x__sub0.01	x__sub0.01	0	0	0	0	0	0	0	0	0	0	0	1	0	0	0	0	0	0	0	0	0	0	0	0	0	0	0	0	0	0	0	0	0	0	0	0	0	0	0	0	0	0
77fd794ad4e1d7a6f756d0cf87b9fe23_rep;size=185;	x__sub0.01	x__sub0.01	x__sub0.01	x__sub0.01	x__sub0.01	x__sub0.01	x__sub0.01	0	0	0	2	0	0	2	0	0	0	0	0	0	0	0	0	0	0	0	0	0	1	2	1	0	0	0	1	0	0	1	2	0	0	0	1	0	0	0	1	0	0
c2e2678bce657fe62d6d924d91046eda_rep;size=184;	x__sub0.01	x__sub0.01	x__sub0.01	x__sub0.01	x__sub0.01	x__sub0.01	x__sub0.01	0	0	0	1	0	1	1	0	0	0	0	0	0	0	0	0	0	0	0	0	0	0	0	0	0	0	0	0	0	0	1	0	0	0	0	0	0	0	0	0	0	0
ca5a69a0f3548ec49bd461ead193a4b6_rep;size=183;	x__sub0.01	x__sub0.01	x__sub0.01	x__sub0.01	x__sub0.01	x__sub0.01	x__sub0.01	0	1	2	4	0	2	1	8	0	1	0	10	0	0	1	0	0	0	1	3	0	0	0	5	0	0	2	2	0	0	0	3	0	0	0	0	0	0	3	7	0	0
7e54f9b3c8e5f3d920aa2a8db5aca427_rep;size=183;	x__sub0.01	x__sub0.01	x__sub0.01	x__sub0.01	x__sub0.01	x__sub0.01	x__sub0.01	0	0	0	0	0	0	0	0	0	0	0	0	0	0	0	0	0	0	0	0	0	0	0	0	0	0	0	0	0	0	1	0	0	0	0	0	0	0	0	0	0	0
ab233fccf44593567a5c3dfbe0b4ef15_rep;size=182;	x__sub0.01	x__sub0.01	x__sub0.01	x__sub0.01	x__sub0.01	x__sub0.01	x__sub0.01	0	0	0	0	0	0	0	0	0	0	0	0	0	0	0	0	0	0	0	0	0	0	0	0	0	0	0	0	0	0	0	0	0	0	0	0	0	0	0	0	0	0
5cd177d2d019706100afba6f42b21d67_rep;size=181;	x__sub0.01	x__sub0.01	x__sub0.01	x__sub0.01	x__sub0.01	x__sub0.01	x__sub0.01	1	0	0	0	1	0	0	0	6	0	0	1	3	0	0	1	0	0	0	0	3	0	0	0	0	0	0	0	9	0	0	0	3	0	0	0	0	0	0	0	0	0
73433d2493ec6017471d43bf8da7ea51_rep;size=180;	x__sub0.01	x__sub0.01	x__sub0.01	x__sub0.01	x__sub0.01	x__sub0.01	x__sub0.01	0	0	0	0	0	0	0	0	0	0	0	0	0	0	0	0	0	0	0	0	0	0	0	0	0	0	0	0	0	0	0	0	0	0	0	0	0	0	0	1	0	0
100fe4506d10ed14ed480b09e6924d37_rep;size=179;	x__sub0.01	x__sub0.01	x__sub0.01	x__sub0.01	x__sub0.01	x__sub0.01	x__sub0.01	3	0	0	0	1	0	0	0	3	0	0	0	3	0	0	0	5	0	0	0	3	0	0	0	0	0	0	0	3	0	0	0	1	0	0	0	0	0	0	0	3	0
2352bea3805e95c89c3be8e943a25e10_rep;size=179;	x__sub0.01	x__sub0.01	x__sub0.01	x__sub0.01	x__sub0.01	x__sub0.01	x__sub0.01	0	0	0	2	0	0	0	0	1	0	0	3	0	0	0	0	0	1	0	0	0	0	0	1	0	0	1	2	0	0	0	1	0	1	0	0	0	1	0	3	0	0
2110ddd0286d2a94171a400c69937d04_rep;size=178;	x__sub0.01	x__sub0.01	x__sub0.01	x__sub0.01	x__sub0.01	x__sub0.01	x__sub0.01	0	0	0	0	1	0	0	0	3	0	0	0	1	0	0	0	2	0	0	0	0	0	0	0	0	0	0	0	1	0	0	0	3	0	0	0	4	0	0	0	2	0
b3f26b0628fc378739221f1717e7dfbd_rep;size=178;	x__sub0.01	x__sub0.01	x__sub0.01	x__sub0.01	x__sub0.01	x__sub0.01	x__sub0.01	0	0	0	0	1	0	0	0	2	0	0	0	0	0	0	0	0	0	0	0	0	0	0	0	0	0	0	0	1	0	0	0	0	0	0	0	0	0	0	0	0	0
ad5ae6e2cfd9180506e13d4b00250bce_rep;size=178;	x__sub0.01	x__sub0.01	x__sub0.01	x__sub0.01	x__sub0.01	x__sub0.01	x__sub0.01	0	2	0	0	0	0	1	0	0	0	0	0	0	0	0	0	0	0	0	0	0	0	0	0	0	0	0	0	0	0	0	1	0	0	0	0	0	0	0	0	0	0
8fef8694ada04f92cb5d85942863516c_rep;size=178;	x__sub0.01	x__sub0.01	x__sub0.01	x__sub0.01	x__sub0.01	x__sub0.01	x__sub0.01	0	0	0	0	0	0	0	0	0	0	0	0	0	0	1	3	0	0	1	0	0	0	2	1	0	0	2	11	0	2	0	1	0	1	1	2	0	0	2	5	0	0
396fed880837505973143c8a136851a6_rep;size=177;	x__sub0.01	x__sub0.01	x__sub0.01	x__sub0.01	x__sub0.01	x__sub0.01	x__sub0.01	7	0	0	0	1	0	0	0	6	0	0	0	10	0	0	0	1	0	0	0	6	0	0	0	0	0	0	0	7	0	0	0	10	0	0	0	7	0	0	0	17	0
36f854dac41c5bff5ce50d126362e3c9_rep;size=176;	x__sub0.01	x__sub0.01	x__sub0.01	x__sub0.01	x__sub0.01	x__sub0.01	x__sub0.01	1	3	0	0	0	1	0	1	0	4	1	4	2	3	9	6	1	2	5	8	1	3	3	1	0	2	8	7	1	1	1	2	1	0	5	5	2	2	3	5	0	0
2de9aba793c6138dc04f88a2cbe3edfd_rep;size=176;	x__sub0.01	x__sub0.01	x__sub0.01	x__sub0.01	x__sub0.01	x__sub0.01	x__sub0.01	0	0	0	0	0	0	0	0	0	0	0	0	0	0	0	0	0	0	0	0	0	0	0	0	0	0	0	0	0	0	0	0	0	0	0	0	0	0	0	0	0	0
6aae670a0a1f55b73b034a8a391dbf49_rep;size=175;	x__sub0.01	x__sub0.01	x__sub0.01	x__sub0.01	x__sub0.01	x__sub0.01	x__sub0.01	0	0	0	0	0	0	0	0	0	0	0	0	0	0	0	0	0	0	0	0	1	0	0	0	0	0	0	0	0	0	0	0	0	0	0	0	6	0	0	0	0	0
e81daf8c36d48c49b5a6a5827978d3ec_rep;size=175;	x__sub0.01	x__sub0.01	x__sub0.01	x__sub0.01	x__sub0.01	x__sub0.01	x__sub0.01	0	0	0	0	0	0	0	0	0	0	0	0	0	0	0	0	2	0	0	0	2	0	0	0	2	0	0	0	0	0	0	0	0	0	0	0	0	0	0	0	23	0
d1350f30654604c0578e096e267f86eb_rep;size=174;	x__sub0.01	x__sub0.01	x__sub0.01	x__sub0.01	x__sub0.01	x__sub0.01	x__sub0.01	0	0	0	0	0	0	0	0	0	0	0	0	0	0	0	0	0	0	0	0	0	0	0	0	0	0	0	0	0	0	0	0	0	0	0	0	0	1	0	0	0	0
c46e22aee94f797bffc3b0a75c4d4dfa_rep;size=173;	x__sub0.01	x__sub0.01	x__sub0.01	x__sub0.01	x__sub0.01	x__sub0.01	x__sub0.01	0	0	1	1	0	0	2	1	2	0	2	2	1	1	2	0	0	0	1	1	0	0	0	3	0	2	0	1	0	0	0	1	0	0	1	2	2	1	0	0	0	0
e4fd180aecce04469c7a71a7685b85fb_rep;size=173;	x__sub0.01	x__sub0.01	x__sub0.01	x__sub0.01	x__sub0.01	x__sub0.01	x__sub0.01	7	0	0	0	5	0	0	0	9	0	0	0	7	0	0	0	0	0	0	0	1	0	0	0	0	0	0	0	9	0	0	0	4	0	0	0	2	0	0	0	6	0
10ea54528c3945291cc24398c23c1798_rep;size=173;	x__sub0.01	x__sub0.01	x__sub0.01	x__sub0.01	x__sub0.01	x__sub0.01	x__sub0.01	29	0	0	0	1	0	0	0	1	0	0	0	2	0	0	0	10	0	0	0	8	0	0	0	2	0	0	0	2	0	0	0	1	0	0	0	5	0	0	0	8	0
a53dff438fd039bb3ff402927833bee3_rep;size=172;	x__sub0.01	x__sub0.01	x__sub0.01	x__sub0.01	x__sub0.01	x__sub0.01	x__sub0.01	0	0	0	0	2	0	0	0	6	0	0	0	0	0	0	0	0	0	0	0	8	0	0	0	1	0	0	0	7	0	0	0	5	0	0	1	0	0	0	1	4	0
1cfb4e896c4634cc6036a605c5de8ded_rep;size=172;	x__sub0.01	x__sub0.01	x__sub0.01	x__sub0.01	x__sub0.01	x__sub0.01	x__sub0.01	2	0	1	0	3	1	0	0	2	0	0	0	0	0	0	0	0	0	0	0	2	0	0	0	0	0	0	0	2	0	0	0	3	0	0	0	8	0	0	0	3	0
a3b717ea3749e6ff1923a5f44cbfde19_rep;size=172;	x__sub0.01	x__sub0.01	x__sub0.01	x__sub0.01	x__sub0.01	x__sub0.01	x__sub0.01	0	0	0	0	0	0	0	1	0	0	0	0	0	0	0	0	0	0	0	0	0	0	0	0	0	0	0	0	0	0	0	0	0	0	0	0	0	0	0	0	0	0
279320d2b41756cd8d23b9f5e53eba53_rep;size=171;	x__sub0.01	x__sub0.01	x__sub0.01	x__sub0.01	x__sub0.01	x__sub0.01	x__sub0.01	0	0	0	0	0	0	0	1	0	0	1	0	0	0	0	0	0	0	1	0	0	0	0	0	0	0	1	2	0	0	0	1	0	0	0	1	1	1	0	1	0	0
c6287300abc67e7fed0adc601071ce54_rep;size=170;	x__sub0.01	x__sub0.01	x__sub0.01	x__sub0.01	x__sub0.01	x__sub0.01	x__sub0.01	4	0	0	0	1	0	0	0	0	0	0	0	1	0	0	0	3	0	0	0	3	0	0	0	0	0	0	0	2	0	0	0	0	0	0	0	3	0	0	0	2	0
b10cc022aa591fa08fda9c5ae450e1f5_rep;size=170;	x__sub0.01	x__sub0.01	x__sub0.01	x__sub0.01	x__sub0.01	x__sub0.01	x__sub0.01	0	0	0	1	0	0	0	0	0	0	0	1	0	0	0	0	0	1	0	2	0	0	0	0	0	1	0	0	0	0	0	3	0	1	0	1	0	0	0	0	0	2
d316e73c4dbda40858469cf995954267_rep;size=170;	x__sub0.01	x__sub0.01	x__sub0.01	x__sub0.01	x__sub0.01	x__sub0.01	x__sub0.01	0	0	1	0	0	0	0	0	0	0	0	0	0	0	0	0	0	0	0	0	0	0	0	1	0	0	1	1	0	0	0	0	0	0	0	0	0	0	0	0	0	0
e45ce0e66c8cc5783cd57e9c9435b1c1_rep;size=170;	x__sub0.01	x__sub0.01	x__sub0.01	x__sub0.01	x__sub0.01	x__sub0.01	x__sub0.01	3	0	0	0	7	0	0	0	0	0	0	0	0	0	0	0	0	0	0	0	2	0	0	0	0	0	0	0	0	0	0	0	1	0	0	0	0	0	0	0	2	0
547af30a8dd5d85d531993e710706db8_rep;size=169;	x__sub0.01	x__sub0.01	x__sub0.01	x__sub0.01	x__sub0.01	x__sub0.01	x__sub0.01	0	0	0	0	0	0	0	0	1	0	0	0	3	0	0	0	0	0	0	0	2	0	0	0	0	0	0	0	4	0	0	0	0	0	0	0	0	0	0	0	3	0
0d8a84920212192a9e4c21e9b94e90a2_rep;size=169;	x__sub0.01	x__sub0.01	x__sub0.01	x__sub0.01	x__sub0.01	x__sub0.01	x__sub0.01	9	0	0	0	10	0	0	0	3	0	0	0	5	0	0	0	3	0	0	0	1	0	0	0	5	0	0	0	0	0	0	0	9	0	0	0	0	0	0	0	3	0
6943dea7ed697b45a37c90f5ecc1d6df_rep;size=169;	x__sub0.01	x__sub0.01	x__sub0.01	x__sub0.01	x__sub0.01	x__sub0.01	x__sub0.01	0	1	6	0	0	1	1	0	0	3	0	2	0	1	2	2	0	1	1	1	0	1	3	1	0	4	13	17	0	2	5	8	0	5	3	9	0	0	8	17	0	1
a285ce0cbf32e4409ef9fe17d1cee841_rep;size=168;	x__sub0.01	x__sub0.01	x__sub0.01	x__sub0.01	x__sub0.01	x__sub0.01	x__sub0.01	0	0	0	0	0	0	0	0	0	0	0	0	0	0	0	0	1	0	0	0	0	0	0	0	0	0	0	0	0	0	0	0	2	0	0	0	0	0	0	0	0	0
b0dcd0c9a5fb713655ab1454eb5f1b67_rep;size=167;	x__sub0.01	x__sub0.01	x__sub0.01	x__sub0.01	x__sub0.01	x__sub0.01	x__sub0.01	2	0	0	0	4	0	0	0	0	0	0	0	4	0	0	1	9	0	0	0	17	0	0	0	0	0	0	0	15	0	0	0	0	0	0	0	4	0	0	0	1	0
e91619272db740701a936ab81e61ef62_rep;size=167;	x__sub0.01	x__sub0.01	x__sub0.01	x__sub0.01	x__sub0.01	x__sub0.01	x__sub0.01	0	0	0	0	0	1	0	0	0	2	1	1	0	0	0	0	0	0	0	2	0	0	0	0	0	0	0	0	0	0	0	0	0	0	0	2	0	0	0	1	0	0
86e882c3d7fa671ea16ddf39aa7a1bb1_rep;size=166;	x__sub0.01	x__sub0.01	x__sub0.01	x__sub0.01	x__sub0.01	x__sub0.01	x__sub0.01	0	2	0	0	1	3	3	0	1	2	4	1	2	0	2	2	2	1	2	5	4	3	3	1	2	0	1	4	1	1	0	3	2	1	1	0	3	1	3	0	5	1
b1e9d2a4d81234f3a6b110c699f9f23a_rep;size=166;	x__sub0.01	x__sub0.01	x__sub0.01	x__sub0.01	x__sub0.01	x__sub0.01	x__sub0.01	0	0	0	0	0	0	0	0	0	0	0	0	0	0	0	0	0	0	0	0	0	0	0	0	0	0	0	0	0	0	0	2	0	0	0	0	0	0	0	0	0	0
a58b21f2a8623b44848c3c5cc76511a4_rep;size=166;	x__sub0.01	x__sub0.01	x__sub0.01	x__sub0.01	x__sub0.01	x__sub0.01	x__sub0.01	0	0	0	0	0	0	1	2	0	1	0	2	0	0	2	1	0	0	1	2	0	0	1	2	0	0	0	2	0	0	0	0	0	0	0	0	0	0	0	0	0	0
f660b46ce39c0fb3374d39e49d0b986b_rep;size=165;	x__sub0.01	x__sub0.01	x__sub0.01	x__sub0.01	x__sub0.01	x__sub0.01	x__sub0.01	0	0	0	0	0	0	0	0	0	0	0	0	0	0	0	0	0	0	0	0	0	0	0	0	0	0	0	0	0	0	0	0	0	0	0	0	0	0	0	0	0	0
e5249b9c969148b1fa3474628be81b3f_rep;size=164;	x__sub0.01	x__sub0.01	x__sub0.01	x__sub0.01	x__sub0.01	x__sub0.01	x__sub0.01	2	0	0	0	1	0	0	0	1	0	0	0	4	0	0	0	5	0	0	0	3	0	0	0	2	0	0	0	3	0	0	0	4	0	0	0	2	0	0	0	2	0
90a97a52d65b90686231cc118cc00024_rep;size=164;	x__sub0.01	x__sub0.01	x__sub0.01	x__sub0.01	x__sub0.01	x__sub0.01	x__sub0.01	0	0	0	0	0	0	0	0	0	0	0	0	0	0	0	0	0	0	0	0	0	0	0	0	0	0	0	0	0	0	0	0	0	0	0	0	0	0	0	0	0	0
ac9f5e1e9eb8a9ab00127b036fb19180_rep;size=163;	x__sub0.01	x__sub0.01	x__sub0.01	x__sub0.01	x__sub0.01	x__sub0.01	x__sub0.01	0	0	0	0	0	0	0	0	0	0	0	0	0	0	0	0	0	0	0	0	0	0	0	0	0	0	0	0	0	0	0	0	0	0	0	0	0	0	0	0	0	0
cc5bb1973501c3bd4e07bbb933bd5f71_rep;size=162;	x__sub0.01	x__sub0.01	x__sub0.01	x__sub0.01	x__sub0.01	x__sub0.01	x__sub0.01	1	0	0	0	0	0	0	0	2	0	0	0	4	0	0	0	0	0	0	0	0	0	0	0	0	0	0	0	3	0	0	0	0	0	0	0	2	0	0	0	1	0
42a5281ad7b57bf13bb0e405e6b00729_rep;size=162;	x__sub0.01	x__sub0.01	x__sub0.01	x__sub0.01	x__sub0.01	x__sub0.01	x__sub0.01	0	1	0	0	0	1	0	0	0	0	0	0	0	0	0	0	0	0	0	0	0	0	0	0	0	0	0	0	0	0	0	2	0	0	0	0	0	0	0	0	0	0
4f8e4df7ec8fb2fdddbb8615e597bad7_rep;size=161;	x__sub0.01	x__sub0.01	x__sub0.01	x__sub0.01	x__sub0.01	x__sub0.01	x__sub0.01	0	0	0	0	0	0	0	0	0	0	0	0	1	0	0	0	0	0	0	0	0	0	0	0	0	0	0	0	0	0	0	0	0	0	0	0	0	0	0	0	0	0
7e8f63070991d9c7f44d8bf09519589d_rep;size=161;	x__sub0.01	x__sub0.01	x__sub0.01	x__sub0.01	x__sub0.01	x__sub0.01	x__sub0.01	0	0	0	0	0	0	0	0	0	0	0	0	0	0	0	0	0	0	0	0	0	0	0	0	0	0	0	0	0	0	0	0	0	0	0	0	0	0	0	0	0	0
f55d81aa62a177bb2f469d4378dd3c34_rep;size=160;	x__sub0.01	x__sub0.01	x__sub0.01	x__sub0.01	x__sub0.01	x__sub0.01	x__sub0.01	10	2	1	0	5	0	0	1	1	0	0	0	8	2	1	0	22	0	1	1	6	0	0	2	2	0	0	0	8	1	0	0	0	0	0	0	8	1	1	0	10	1
794ad058f1ad3670a5fc93b4d3774fdf_rep;size=160;	x__sub0.01	x__sub0.01	x__sub0.01	x__sub0.01	x__sub0.01	x__sub0.01	x__sub0.01	1	0	0	0	21	0	0	0	0	0	0	0	2	0	0	0	4	0	0	0	6	0	0	0	0	0	0	0	1	0	0	0	2	0	0	0	0	0	0	0	2	0
0d489c2cecf859be54a89309dc46f5e8_rep;size=160;	x__sub0.01	x__sub0.01	x__sub0.01	x__sub0.01	x__sub0.01	x__sub0.01	x__sub0.01	0	0	0	0	0	0	0	0	0	0	0	0	0	0	0	0	0	0	0	0	0	0	0	0	0	0	0	0	0	0	0	0	0	0	0	0	0	0	0	1	0	0
05a03d2562b73ce49a592c591162aa6b_rep;size=160;	x__sub0.01	x__sub0.01	x__sub0.01	x__sub0.01	x__sub0.01	x__sub0.01	x__sub0.01	0	1	0	0	0	0	0	0	0	0	0	0	0	0	0	0	0	0	0	0	0	0	0	0	0	0	0	0	0	0	0	0	0	0	0	0	0	0	0	0	0	0
961c8c313e6087fade6ce0cccd45d588_rep;size=160;	x__sub0.01	x__sub0.01	x__sub0.01	x__sub0.01	x__sub0.01	x__sub0.01	x__sub0.01	0	0	0	0	0	0	0	0	0	0	0	0	0	0	0	0	0	0	0	0	0	0	0	0	0	0	0	0	0	0	0	0	0	0	0	0	0	0	0	0	0	0
395b74f884f29653b857fd57fd5c73fb_rep;size=159;	x__sub0.01	x__sub0.01	x__sub0.01	x__sub0.01	x__sub0.01	x__sub0.01	x__sub0.01	1	0	0	0	1	0	0	0	2	0	0	0	0	0	0	0	0	0	0	0	0	0	0	0	0	0	0	0	1	0	0	0	0	0	0	0	0	0	0	0	0	0
4aaac51494b45a8fb66bef941ac52a9e_rep;size=159;	x__sub0.01	x__sub0.01	x__sub0.01	x__sub0.01	x__sub0.01	x__sub0.01	x__sub0.01	0	0	0	0	2	0	0	0	1	0	0	0	1	0	0	0	0	0	0	0	1	0	0	0	0	0	0	0	0	0	0	0	0	0	0	0	0	0	0	0	1	0
02e592048cd1b2864d6d662d557300de_rep;size=158;	x__sub0.01	x__sub0.01	x__sub0.01	x__sub0.01	x__sub0.01	x__sub0.01	x__sub0.01	3	0	0	0	2	0	0	0	4	0	0	0	2	0	0	0	0	0	0	0	3	0	0	0	3	0	0	0	4	0	0	0	1	0	0	0	4	0	0	0	3	0
0f4f0483bc8c0281ceafe88870a3d34b_rep;size=157;	x__sub0.01	x__sub0.01	x__sub0.01	x__sub0.01	x__sub0.01	x__sub0.01	x__sub0.01	0	0	0	0	0	0	0	0	0	0	0	0	0	0	0	0	0	0	0	0	0	0	0	0	0	0	0	0	0	0	0	0	0	0	0	0	0	0	0	0	0	0
e4aab7f40c11f5939186e5e11cd0e2e0_rep;size=157;	x__sub0.01	x__sub0.01	x__sub0.01	x__sub0.01	x__sub0.01	x__sub0.01	x__sub0.01	2	1	0	3	8	0	0	1	1	1	0	0	9	2	4	3	4	1	1	3	3	0	2	0	5	0	0	0	6	1	0	1	1	0	0	0	4	0	0	0	5	1
de8d747afb529954ce7aeaa7865440d8_rep;size=157;	x__sub0.01	x__sub0.01	x__sub0.01	x__sub0.01	x__sub0.01	x__sub0.01	x__sub0.01	0	0	0	0	0	1	0	0	0	0	0	0	1	1	0	0	9	0	0	0	0	0	1	0	0	1	0	2	6	0	0	0	17	0	0	0	34	3	1	0	0	0
17834a88693b22e8fc3561d24203b3e2_rep;size=156;	x__sub0.01	x__sub0.01	x__sub0.01	x__sub0.01	x__sub0.01	x__sub0.01	x__sub0.01	0	0	0	0	0	0	0	0	0	0	0	0	0	0	0	0	0	0	0	0	0	0	0	0	0	0	0	0	2	0	0	0	0	0	0	0	0	0	0	0	0	0
a3ceda03f9d1c4c7bf68bce018f34257_rep;size=156;	x__sub0.01	x__sub0.01	x__sub0.01	x__sub0.01	x__sub0.01	x__sub0.01	x__sub0.01	0	0	0	0	0	0	0	1	1	0	1	0	0	0	1	0	0	0	0	2	1	0	1	0	0	1	0	2	0	0	1	4	0	2	0	0	0	2	1	0	0	0
a421797440df5c9c5f1543d429a42a95_rep;size=155;	x__sub0.01	x__sub0.01	x__sub0.01	x__sub0.01	x__sub0.01	x__sub0.01	x__sub0.01	0	0	0	0	0	0	0	0	0	0	0	0	0	0	0	0	0	0	0	0	0	0	0	0	0	0	0	0	0	0	0	0	0	0	0	0	1	0	0	0	0	0
4345f6888087020a350435e6ae2f25ea_rep;size=155;	x__sub0.01	x__sub0.01	x__sub0.01	x__sub0.01	x__sub0.01	x__sub0.01	x__sub0.01	0	0	2	2	0	3	0	1	0	0	0	2	0	3	4	1	0	1	3	4	0	1	5	3	0	3	10	20	0	5	2	8	0	5	2	5	0	0	1	12	0	0
0d29b14f4c0db59b858d48d9afa48b29_rep;size=155;	x__sub0.01	x__sub0.01	x__sub0.01	x__sub0.01	x__sub0.01	x__sub0.01	x__sub0.01	0	0	0	0	0	0	0	0	0	0	0	0	0	0	2	3	0	0	0	2	0	0	0	4	0	3	1	16	0	0	0	1	0	0	0	2	0	0	0	7	0	0
9b88e8b3114cefe54a8d58e677da210e_rep;size=154;	x__sub0.01	x__sub0.01	x__sub0.01	x__sub0.01	x__sub0.01	x__sub0.01	x__sub0.01	3	0	0	0	0	0	0	0	0	0	0	0	0	0	0	0	0	0	0	0	4	0	0	0	2	0	0	0	0	0	0	0	0	0	0	0	0	0	0	0	0	0
f4956e235bfa7a61a5a88525bd85d93a_rep;size=153;	x__sub0.01	x__sub0.01	x__sub0.01	x__sub0.01	x__sub0.01	x__sub0.01	x__sub0.01	3	0	1	0	3	0	0	0	0	0	0	0	4	1	0	1	0	0	0	0	1	0	0	0	1	0	0	0	2	0	0	0	0	0	0	0	1	0	0	0	0	0
34d142c2290c4164b0ebec617f730737_rep;size=153;	x__sub0.01	x__sub0.01	x__sub0.01	x__sub0.01	x__sub0.01	x__sub0.01	x__sub0.01	9	0	0	0	1	0	0	0	1	0	0	0	2	0	0	0	1	0	0	0	9	0	0	0	1	0	0	0	5	0	0	0	1	0	0	0	13	0	0	0	12	0
a1f962fbd217bbf22907f8efc9a7b90e_rep;size=153;	x__sub0.01	x__sub0.01	x__sub0.01	x__sub0.01	x__sub0.01	x__sub0.01	x__sub0.01	0	0	0	0	0	0	0	0	0	0	0	0	0	0	0	0	0	0	0	0	0	0	0	0	0	0	0	0	0	0	0	0	0	0	0	0	0	0	0	0	0	0
4d784fe649b6b71f7b60b61feaabdd32_rep;size=152;	x__sub0.01	x__sub0.01	x__sub0.01	x__sub0.01	x__sub0.01	x__sub0.01	x__sub0.01	0	0	0	0	8	0	0	0	0	1	0	0	0	0	0	0	14	0	0	0	0	0	0	0	0	0	0	0	0	0	0	0	0	0	0	0	0	0	0	0	0	0
367c93286e015ba19ebeb754ca816336_rep;size=152;	x__sub0.01	x__sub0.01	x__sub0.01	x__sub0.01	x__sub0.01	x__sub0.01	x__sub0.01	0	3	0	1	0	0	1	0	0	0	0	2	0	0	0	4	0	1	0	4	0	1	1	2	0	0	0	7	0	0	0	0	0	0	2	4	0	0	2	2	1	0
13ce6504acb238e4dc95ab789be6c170_rep;size=152;	x__sub0.01	x__sub0.01	x__sub0.01	x__sub0.01	x__sub0.01	x__sub0.01	x__sub0.01	0	0	0	0	0	0	0	0	0	0	0	0	0	0	0	0	0	0	0	0	0	0	0	0	0	0	0	0	0	0	0	0	0	0	0	0	0	0	0	0	0	0
d19444d0c54eff13f942d0409f9ac64f_rep;size=150;	x__sub0.01	x__sub0.01	x__sub0.01	x__sub0.01	x__sub0.01	x__sub0.01	x__sub0.01	1	0	0	0	1	0	0	0	5	0	0	0	0	0	0	0	1	0	0	0	2	0	0	0	1	0	0	0	4	0	0	0	4	0	0	0	0	1	0	0	6	0
9ba6d1502f8cb181dfbe2f2059b31dba_rep;size=150;	x__sub0.01	x__sub0.01	x__sub0.01	x__sub0.01	x__sub0.01	x__sub0.01	x__sub0.01	4	0	0	0	0	0	0	0	0	0	0	0	2	0	0	0	0	0	0	0	0	0	0	0	0	0	0	0	1	0	0	0	1	0	0	0	6	0	0	0	0	0
f41a2af4d68e184a8e5524eb4293df42_rep;size=149;	x__sub0.01	x__sub0.01	x__sub0.01	x__sub0.01	x__sub0.01	x__sub0.01	x__sub0.01	1	0	0	0	1	0	0	0	6	0	0	0	2	0	0	0	0	0	0	0	3	0	0	0	6	0	0	0	7	0	0	0	2	0	0	0	4	0	0	0	2	0
91c9d9a05a1697a3507dd0218a536bab_rep;size=148;	x__sub0.01	x__sub0.01	x__sub0.01	x__sub0.01	x__sub0.01	x__sub0.01	x__sub0.01	3	0	0	0	1	0	0	0	0	0	0	0	0	0	0	0	2	0	0	0	2	0	0	0	2	0	0	0	5	0	0	0	0	0	0	0	1	0	0	0	6	0
13d4b73bc9e82a73480d478c86b598e7_rep;size=147;	x__sub0.01	x__sub0.01	x__sub0.01	x__sub0.01	x__sub0.01	x__sub0.01	x__sub0.01	1	0	1	0	1	0	0	0	0	0	0	0	2	0	0	0	3	0	0	0	5	0	0	0	3	0	0	0	9	0	0	0	4	0	0	0	1	0	0	0	7	0
d499e76f9fd6c362210a9c2a54809e76_rep;size=147;	x__sub0.01	x__sub0.01	x__sub0.01	x__sub0.01	x__sub0.01	x__sub0.01	x__sub0.01	0	0	0	0	0	0	0	0	0	0	0	0	0	0	0	0	0	0	0	0	0	0	0	0	1	0	0	0	0	0	0	0	0	0	0	0	19	0	0	0	0	0
3d67cdd3c069110347758b9fa4d8072a_rep;size=146;	x__sub0.01	x__sub0.01	x__sub0.01	x__sub0.01	x__sub0.01	x__sub0.01	x__sub0.01	4	0	0	0	0	0	0	0	6	0	0	0	10	0	0	0	1	0	0	0	5	0	0	0	1	0	0	0	1	0	0	0	0	0	0	0	9	0	0	0	3	0
745ed93f3845e9c056faba6cb439dc77_rep;size=145;	x__sub0.01	x__sub0.01	x__sub0.01	x__sub0.01	x__sub0.01	x__sub0.01	x__sub0.01	2	0	0	0	2	0	0	0	0	0	0	0	4	0	0	0	2	0	0	0	3	0	0	0	0	0	0	0	3	0	0	0	2	0	0	0	1	0	0	0	2	0
85b257cc554ded9c4b826591162e02e8_rep;size=144;	x__sub0.01	x__sub0.01	x__sub0.01	x__sub0.01	x__sub0.01	x__sub0.01	x__sub0.01	2	0	0	0	6	0	0	0	15	0	0	0	1	0	0	0	11	0	0	0	13	0	0	0	2	0	0	0	3	0	0	0	6	0	0	0	12	0	0	0	4	0
c8320477f2a9edf4c377ed729876f704_rep;size=144;	x__sub0.01	x__sub0.01	x__sub0.01	x__sub0.01	x__sub0.01	x__sub0.01	x__sub0.01	0	0	0	0	3	0	0	0	0	0	0	0	7	0	0	0	3	0	0	0	8	0	0	0	2	0	0	0	4	0	0	0	1	0	0	0	0	0	0	0	1	0
7e1c336b6c5baca63bea34733d34ba4f_rep;size=144;	x__sub0.01	x__sub0.01	x__sub0.01	x__sub0.01	x__sub0.01	x__sub0.01	x__sub0.01	0	0	0	0	0	0	0	0	0	0	0	0	0	0	0	0	0	0	0	0	0	0	0	0	0	0	0	0	0	0	0	0	0	0	0	0	0	0	0	0	0	0
2d4265b868c2b048f370db79f07f84b7_rep;size=143;	x__sub0.01	x__sub0.01	x__sub0.01	x__sub0.01	x__sub0.01	x__sub0.01	x__sub0.01	0	0	0	0	0	0	0	0	0	0	0	0	0	0	0	0	0	0	0	0	0	0	0	0	0	0	0	0	0	0	0	0	0	0	0	0	0	0	0	0	0	0
5203fd894421d958ef96fedff2723ad3_rep;size=143;	x__sub0.01	x__sub0.01	x__sub0.01	x__sub0.01	x__sub0.01	x__sub0.01	x__sub0.01	0	0	0	0	0	0	0	0	0	0	0	0	0	0	0	0	0	0	0	0	0	0	0	0	0	0	0	0	0	0	0	0	0	0	0	0	0	0	0	0	0	0
9dca910d535d99327820ed9f34cbb1fc_rep;size=143;	x__sub0.01	x__sub0.01	x__sub0.01	x__sub0.01	x__sub0.01	x__sub0.01	x__sub0.01	0	0	0	0	0	0	1	0	0	0	0	0	0	0	0	0	0	0	0	0	0	0	0	0	0	0	0	0	0	0	0	0	0	0	1	0	0	0	0	0	0	0
86ef2819d8c917e9644e6395987e55ce_rep;size=143;	x__sub0.01	x__sub0.01	x__sub0.01	x__sub0.01	x__sub0.01	x__sub0.01	x__sub0.01	0	0	0	0	0	1	0	0	0	0	0	0	0	0	0	0	0	0	0	0	0	0	0	0	0	0	0	0	0	0	0	0	0	1	0	0	0	0	0	0	0	0
0c2c4d69a493bd74262abb8baedb7b72_rep;size=142;	x__sub0.01	x__sub0.01	x__sub0.01	x__sub0.01	x__sub0.01	x__sub0.01	x__sub0.01	0	0	0	0	0	0	1	0	0	0	0	1	0	0	0	0	0	0	0	0	0	1	0	0	0	1	0	1	0	0	0	0	0	0	3	1	0	0	0	3	0	1
3f6736ce964852bd628ee2d6a14b2ca1_rep;size=141;	x__sub0.01	x__sub0.01	x__sub0.01	x__sub0.01	x__sub0.01	x__sub0.01	x__sub0.01	1	0	0	0	4	0	0	0	0	0	0	0	2	0	0	0	0	0	0	0	3	0	0	0	1	0	0	0	1	0	0	0	4	0	0	0	9	0	0	0	2	0
681c0a7aabd031f8e89817d43900a5f7_rep;size=141;	x__sub0.01	x__sub0.01	x__sub0.01	x__sub0.01	x__sub0.01	x__sub0.01	x__sub0.01	0	0	0	0	0	0	0	0	0	0	0	0	0	0	0	0	0	0	0	0	0	0	0	0	0	0	0	0	0	0	0	0	0	0	0	0	32	0	0	0	0	0
9f5dd7d468887bf74bbc20daa8ad409b_rep;size=141;	x__sub0.01	x__sub0.01	x__sub0.01	x__sub0.01	x__sub0.01	x__sub0.01	x__sub0.01	4	0	0	0	2	0	0	0	19	0	0	0	22	0	0	0	6	0	0	0	0	0	0	0	2	0	0	0	8	0	0	0	2	0	0	0	2	0	1	0	2	0
9b75276d4ce94ab3baf19800a6f74e43_rep;size=140;	x__sub0.01	x__sub0.01	x__sub0.01	x__sub0.01	x__sub0.01	x__sub0.01	x__sub0.01	0	0	0	0	2	0	0	0	2	0	0	0	2	0	0	0	3	1	0	0	4	0	0	0	1	2	0	0	9	0	0	0	3	0	0	0	7	0	0	0	5	0
a915df1bb223c24fa531e06240c490f5_rep;size=140;	x__sub0.01	x__sub0.01	x__sub0.01	x__sub0.01	x__sub0.01	x__sub0.01	x__sub0.01	0	0	0	0	0	0	0	0	0	0	0	0	0	0	0	0	0	0	0	0	1	0	0	0	0	0	0	0	0	0	0	0	1	0	0	0	0	0	0	0	1	0
dba24ce7938a420535edf0f9bfc018f2_rep;size=139;	x__sub0.01	x__sub0.01	x__sub0.01	x__sub0.01	x__sub0.01	x__sub0.01	x__sub0.01	0	0	0	0	0	0	0	0	0	0	0	0	0	0	0	0	0	0	0	0	0	0	0	0	0	0	0	0	0	0	0	0	0	0	0	0	0	0	0	0	0	0
cfeccaf2c15bf6d16e91227a68cdcef7_rep;size=136;	x__sub0.01	x__sub0.01	x__sub0.01	x__sub0.01	x__sub0.01	x__sub0.01	x__sub0.01	0	0	0	0	0	0	0	0	0	0	0	0	0	0	0	0	0	0	0	0	0	0	0	0	0	0	0	0	0	0	0	0	0	0	0	0	0	0	0	0	0	0
80df79a3b2d94f844390a33b00f7bdcd_rep;size=135;	x__sub0.01	x__sub0.01	x__sub0.01	x__sub0.01	x__sub0.01	x__sub0.01	x__sub0.01	2	0	0	0	1	0	0	0	3	0	0	0	0	1	0	0	8	0	0	0	4	0	0	0	0	0	0	0	1	0	0	0	5	0	0	0	3	0	0	0	3	0
af73e61bcc15bfa244c2d96459af2c43_rep;size=135;	x__sub0.01	x__sub0.01	x__sub0.01	x__sub0.01	x__sub0.01	x__sub0.01	x__sub0.01	3	0	0	0	0	0	0	0	3	0	0	0	0	0	0	0	3	0	0	0	2	0	0	0	0	0	0	0	2	0	0	0	0	0	0	0	2	0	0	0	3	0
287f564153b8ac942a15ce7e0253e327_rep;size=135;	x__sub0.01	x__sub0.01	x__sub0.01	x__sub0.01	x__sub0.01	x__sub0.01	x__sub0.01	3	0	0	0	2	0	0	0	6	0	0	0	0	0	0	0	0	0	0	0	2	0	0	0	1	0	0	0	0	0	0	0	10	0	0	0	10	0	0	0	1	0
e691af0964e931c42c31d580ded80f1d_rep;size=133;	x__sub0.01	x__sub0.01	x__sub0.01	x__sub0.01	x__sub0.01	x__sub0.01	x__sub0.01	0	3	0	1	1	0	0	0	2	1	0	1	0	1	0	1	0	0	0	0	0	0	0	0	2	0	0	0	1	2	2	1	0	1	1	0	2	1	0	0	1	2
4634e5e7abf79b1ec7b6f49b78e9bf47_rep;size=133;	x__sub0.01	x__sub0.01	x__sub0.01	x__sub0.01	x__sub0.01	x__sub0.01	x__sub0.01	0	0	0	0	1	0	0	0	3	0	0	0	6	0	0	0	5	0	0	0	0	0	0	0	3	0	0	0	7	0	0	0	0	0	0	0	10	0	0	0	0	0
2cf082ca371fb464b3ff44777aeef651_rep;size=133;	x__sub0.01	x__sub0.01	x__sub0.01	x__sub0.01	x__sub0.01	x__sub0.01	x__sub0.01	0	0	1	0	0	0	0	1	0	0	0	0	0	0	0	0	0	0	0	0	0	0	0	0	0	0	0	0	0	0	0	0	0	0	0	0	0	0	0	0	0	0
0feefcb3cdcb063922980fc43fca4ce7_rep;size=132;	x__sub0.01	x__sub0.01	x__sub0.01	x__sub0.01	x__sub0.01	x__sub0.01	x__sub0.01	0	0	0	0	0	0	0	0	0	0	0	0	0	0	0	0	0	0	0	0	0	0	0	0	0	0	0	0	0	0	0	0	0	0	0	0	0	0	0	0	0	0
915eb7d37d47c82580587456cb15241b_rep;size=132;	x__sub0.01	x__sub0.01	x__sub0.01	x__sub0.01	x__sub0.01	x__sub0.01	x__sub0.01	0	0	0	0	0	0	0	0	0	0	0	0	0	0	0	0	0	0	0	0	0	0	0	0	0	0	0	0	0	0	0	0	0	0	0	0	0	0	0	0	0	0
813498578e0d24c0861f627a0dd9a1f3_rep;size=131;	x__sub0.01	x__sub0.01	x__sub0.01	x__sub0.01	x__sub0.01	x__sub0.01	x__sub0.01	4	0	0	0	3	0	0	0	2	0	0	0	2	0	0	0	1	0	0	0	2	0	0	0	1	0	0	0	6	0	0	0	3	0	0	0	1	0	0	0	4	0
f124f74aaccc281d3141decfa102e03c_rep;size=131;	x__sub0.01	x__sub0.01	x__sub0.01	x__sub0.01	x__sub0.01	x__sub0.01	x__sub0.01	1	0	0	0	0	0	0	0	0	0	0	0	1	0	0	0	0	0	0	0	0	0	0	0	0	0	0	0	0	0	0	0	6	0	0	0	0	0	0	0	1	0
8b47e2249c092b3688aa3d9e80a94b3e_rep;size=129;	x__sub0.01	x__sub0.01	x__sub0.01	x__sub0.01	x__sub0.01	x__sub0.01	x__sub0.01	0	0	0	0	0	0	1	0	0	0	0	0	0	0	0	0	0	0	0	0	0	0	0	0	0	0	0	0	0	0	0	0	0	0	0	0	0	0	0	0	0	0
9449b459e86bdfb31a3b933673c656da_rep;size=128;	x__sub0.01	x__sub0.01	x__sub0.01	x__sub0.01	x__sub0.01	x__sub0.01	x__sub0.01	1	0	0	0	6	0	0	0	1	0	0	0	2	0	0	0	3	0	0	0	2	0	0	0	3	0	0	0	2	0	0	0	2	0	0	0	1	0	0	0	0	0
908deeeab0642b65fd4fd73c0853e561_rep;size=128;	x__sub0.01	x__sub0.01	x__sub0.01	x__sub0.01	x__sub0.01	x__sub0.01	x__sub0.01	0	0	0	0	0	0	0	0	0	0	0	0	0	0	0	0	1	0	0	0	0	0	0	0	0	0	0	0	0	0	0	0	0	0	0	0	3	0	0	0	1	0
fe71f4c86f71f23798c76150b8781ae6_rep;size=128;	x__sub0.01	x__sub0.01	x__sub0.01	x__sub0.01	x__sub0.01	x__sub0.01	x__sub0.01	0	0	0	0	0	0	0	1	0	0	0	2	0	1	0	0	0	0	0	0	0	0	0	0	0	0	0	0	0	0	3	0	0	0	0	0	0	0	0	1	0	0
374b194053171ba7606382429b826ae4_rep;size=127;	x__sub0.01	x__sub0.01	x__sub0.01	x__sub0.01	x__sub0.01	x__sub0.01	x__sub0.01	0	0	0	0	1	2	1	0	1	0	0	0	1	0	1	0	1	1	0	1	1	0	1	0	5	0	0	2	5	0	0	0	0	0	0	1	1	2	1	2	2	0
4dc870b759b765cdee12a82c5b0e00a5_rep;size=127;	x__sub0.01	x__sub0.01	x__sub0.01	x__sub0.01	x__sub0.01	x__sub0.01	x__sub0.01	0	0	0	0	0	0	0	0	0	0	0	0	0	0	0	0	0	0	0	0	0	0	0	0	0	0	0	0	0	0	0	0	0	0	0	0	0	0	0	0	0	0
e4573aebbc1b80a1e1522d6f05f9f232_rep;size=127;	x__sub0.01	x__sub0.01	x__sub0.01	x__sub0.01	x__sub0.01	x__sub0.01	x__sub0.01	0	1	0	1	0	1	0	0	1	0	0	1	0	0	0	2	0	0	0	0	0	1	0	0	0	0	0	0	0	0	0	3	0	0	0	0	1	0	0	1	1	1
be10cae724112c567286bf171bc884c7_rep;size=126;	x__sub0.01	x__sub0.01	x__sub0.01	x__sub0.01	x__sub0.01	x__sub0.01	x__sub0.01	4	0	0	0	0	0	0	0	4	0	0	0	5	0	0	1	0	0	0	0	5	0	0	0	2	0	0	0	18	0	0	0	5	0	0	0	1	0	0	0	11	0
e0f7d807332064ce4b481c31141d6f5f_rep;size=126;	x__sub0.01	x__sub0.01	x__sub0.01	x__sub0.01	x__sub0.01	x__sub0.01	x__sub0.01	1	0	0	0	1	0	0	0	7	0	0	0	6	0	0	0	7	0	0	0	1	0	0	0	5	0	0	0	0	0	0	0	2	0	0	0	2	0	0	0	1	0
8068bb276f11b16f6798d06415a99be5_rep;size=126;	x__sub0.01	x__sub0.01	x__sub0.01	x__sub0.01	x__sub0.01	x__sub0.01	x__sub0.01	0	0	0	0	3	0	0	0	3	0	0	0	5	0	0	0	4	0	0	0	5	0	0	1	1	0	0	0	4	0	0	0	2	0	0	0	6	0	0	0	5	0
2bd27dfe2dde2039bb7dcf08a5390675_rep;size=126;	x__sub0.01	x__sub0.01	x__sub0.01	x__sub0.01	x__sub0.01	x__sub0.01	x__sub0.01	0	0	0	0	0	0	0	0	0	0	0	0	0	0	0	0	0	0	0	0	0	0	0	0	0	0	1	0	0	0	0	0	0	0	1	0	0	0	0	0	0	0
7de87529e1aec460e64cfadbc575a504_rep;size=126;	x__sub0.01	x__sub0.01	x__sub0.01	x__sub0.01	x__sub0.01	x__sub0.01	x__sub0.01	0	0	0	0	0	0	0	0	0	0	0	0	0	0	0	0	0	0	0	0	0	0	1	0	0	0	0	0	0	1	0	0	0	0	0	0	0	0	0	0	0	0
5b57331e68412395a73b42276d37abf6_rep;size=125;	x__sub0.01	x__sub0.01	x__sub0.01	x__sub0.01	x__sub0.01	x__sub0.01	x__sub0.01	0	0	0	0	0	0	0	0	2	0	0	0	3	0	0	0	0	0	0	0	0	0	0	0	1	0	0	0	4	0	0	0	3	0	0	0	0	0	0	0	0	0
e543d9c190acecd28a130d115ac12486_rep;size=125;	x__sub0.01	x__sub0.01	x__sub0.01	x__sub0.01	x__sub0.01	x__sub0.01	x__sub0.01	0	0	0	0	0	0	0	0	0	0	0	0	0	0	0	0	0	0	0	0	3	0	0	0	1	0	0	0	1	0	0	0	1	0	0	0	0	0	0	0	0	0
4bd18f2cdf70e000dea53a0ce5bc42e6_rep;size=125;	x__sub0.01	x__sub0.01	x__sub0.01	x__sub0.01	x__sub0.01	x__sub0.01	x__sub0.01	0	0	0	0	0	0	0	0	0	0	0	0	0	0	0	0	0	0	0	0	0	0	0	0	0	0	0	0	0	0	0	0	0	0	0	0	0	0	0	0	0	0
3163acaeee544fff2c9e7e3c761cfc3b_rep;size=124;	x__sub0.01	x__sub0.01	x__sub0.01	x__sub0.01	x__sub0.01	x__sub0.01	x__sub0.01	7	0	0	0	2	0	0	0	20	0	0	0	10	0	1	0	3	0	0	0	7	0	0	0	3	0	0	0	7	0	0	0	3	0	0	0	8	0	0	0	1	0
a53a9ef19a49b64d1f4cfb8794a94efd_rep;size=124;	x__sub0.01	x__sub0.01	x__sub0.01	x__sub0.01	x__sub0.01	x__sub0.01	x__sub0.01	0	0	0	0	0	0	0	0	0	0	0	0	0	0	0	0	0	0	0	0	0	0	0	0	0	0	0	0	0	0	0	0	0	0	0	0	0	0	0	0	0	0
f7f6bb452e06f4a005a670aa7fc01d72_rep;size=123;	x__sub0.01	x__sub0.01	x__sub0.01	x__sub0.01	x__sub0.01	x__sub0.01	x__sub0.01	0	0	0	0	0	0	0	0	0	0	0	0	0	0	0	0	0	0	0	0	0	0	0	0	0	0	0	0	0	0	0	0	0	0	0	0	0	0	0	0	0	0
035c687783ceb971c01aaa76d5c4a7e2_rep;size=123;	x__sub0.01	x__sub0.01	x__sub0.01	x__sub0.01	x__sub0.01	x__sub0.01	x__sub0.01	0	0	0	0	0	0	0	0	0	0	0	0	4	0	1	0	1	0	0	0	1	0	0	0	2	0	0	0	0	0	0	0	1	0	0	0	0	0	0	0	1	0
c50e36bf4d67b94b4dd83ea6ad4d85ef_rep;size=122;	x__sub0.01	x__sub0.01	x__sub0.01	x__sub0.01	x__sub0.01	x__sub0.01	x__sub0.01	0	0	0	0	11	0	0	0	0	0	0	0	0	0	0	0	0	0	0	0	0	0	0	0	0	0	0	0	0	0	0	0	18	0	0	0	0	0	0	0	10	0
04e53feca3ce84c707d042a8084386ed_rep;size=122;	x__sub0.01	x__sub0.01	x__sub0.01	x__sub0.01	x__sub0.01	x__sub0.01	x__sub0.01	0	0	0	0	0	0	0	0	0	0	0	0	0	0	0	0	0	0	0	0	0	0	0	0	0	0	0	0	0	0	0	0	0	0	0	0	0	0	0	0	0	0
a173285d7cadc4fa816191426e419ccf_rep;size=121;	x__sub0.01	x__sub0.01	x__sub0.01	x__sub0.01	x__sub0.01	x__sub0.01	x__sub0.01	0	0	0	0	0	0	0	0	0	0	0	0	0	0	0	0	0	0	0	0	1	0	0	0	0	0	0	0	0	0	0	0	0	0	0	0	0	0	0	0	0	0
7d02d3c8c9903f946a6cb818c2ecd7b2_rep;size=121;	x__sub0.01	x__sub0.01	x__sub0.01	x__sub0.01	x__sub0.01	x__sub0.01	x__sub0.01	2	0	0	0	2	0	0	0	5	0	0	0	0	0	0	0	3	0	0	0	2	0	0	0	1	0	0	0	1	0	0	0	3	0	0	0	0	0	0	0	6	0
dbb9a5eaac58d214817e0c9276120266_rep;size=120;	x__sub0.01	x__sub0.01	x__sub0.01	x__sub0.01	x__sub0.01	x__sub0.01	x__sub0.01	0	0	0	0	0	0	0	0	0	0	0	0	0	0	0	0	1	0	0	0	0	0	0	0	0	0	0	0	0	0	0	0	0	0	0	0	0	0	0	0	0	0
78385fb77f721e1d9a66ffefb69785d6_rep;size=120;	x__sub0.01	x__sub0.01	x__sub0.01	x__sub0.01	x__sub0.01	x__sub0.01	x__sub0.01	0	0	0	0	0	0	0	0	0	0	0	0	0	0	0	0	0	0	0	0	0	0	0	0	0	0	0	0	1	0	0	0	0	0	0	0	0	0	0	0	0	0
4a6a97569a913a69cbb5098818985558_rep;size=120;	x__sub0.01	x__sub0.01	x__sub0.01	x__sub0.01	x__sub0.01	x__sub0.01	x__sub0.01	1	0	0	0	1	0	0	0	1	0	0	0	1	0	0	0	1	0	0	0	0	0	0	0	0	0	0	0	0	0	0	0	0	0	0	0	1	0	0	0	0	0
5e7a77ad3d6d678ee4b70b60909241e9_rep;size=120;	x__sub0.01	x__sub0.01	x__sub0.01	x__sub0.01	x__sub0.01	x__sub0.01	x__sub0.01	0	0	0	0	0	0	0	0	4	0	0	0	1	0	0	0	12	0	0	0	0	0	0	0	0	0	0	0	0	0	0	0	0	0	0	0	0	0	0	0	0	0
bb8b5a649c152b8418f1b1daad7a29cd_rep;size=120;	x__sub0.01	x__sub0.01	x__sub0.01	x__sub0.01	x__sub0.01	x__sub0.01	x__sub0.01	0	0	0	0	0	0	0	0	0	0	0	0	0	0	0	0	0	0	0	0	0	0	0	0	0	0	0	0	0	0	0	1	0	0	0	0	0	0	0	0	0	0
b3c469dbdfefd4899f08ad162f209af4_rep;size=118;	x__sub0.01	x__sub0.01	x__sub0.01	x__sub0.01	x__sub0.01	x__sub0.01	x__sub0.01	2	0	0	0	0	0	0	0	0	0	0	0	0	0	0	0	0	0	0	0	0	0	0	0	0	0	0	0	0	0	0	0	0	0	0	0	0	0	0	0	0	0
990103f7f2679ae8a29c54d088dce806_rep;size=118;	x__sub0.01	x__sub0.01	x__sub0.01	x__sub0.01	x__sub0.01	x__sub0.01	x__sub0.01	0	0	0	0	0	0	0	0	0	0	0	0	6	0	0	0	0	0	0	0	4	0	0	2	4	0	0	0	19	0	0	0	0	0	0	0	0	0	0	0	3	0
e04ebfe90c66d4a96a301fe2a89ceda7_rep;size=118;	x__sub0.01	x__sub0.01	x__sub0.01	x__sub0.01	x__sub0.01	x__sub0.01	x__sub0.01	0	0	0	0	0	0	0	0	0	0	0	0	0	0	0	0	0	0	0	0	0	0	0	0	0	0	0	2	0	0	0	0	0	0	0	0	0	0	0	0	0	0
308c5ea3a53eb14c1e6fd67d55a5b663_rep;size=118;	x__sub0.01	x__sub0.01	x__sub0.01	x__sub0.01	x__sub0.01	x__sub0.01	x__sub0.01	0	0	0	0	0	0	1	0	0	0	0	0	0	0	0	0	0	0	0	1	0	0	0	1	0	0	0	0	0	0	0	0	0	0	0	0	0	0	0	0	0	0
8d85e72dc3a9f16cd8ecb3b74d88c498_rep;size=118;	x__sub0.01	x__sub0.01	x__sub0.01	x__sub0.01	x__sub0.01	x__sub0.01	x__sub0.01	0	4	2	0	0	1	1	0	0	4	0	0	0	1	2	2	0	1	0	3	0	2	2	1	0	4	5	11	0	1	1	8	0	2	2	3	0	0	7	17	0	2
4bad3fd86c506893aaaea4697f0d0a37_rep;size=118;	x__sub0.01	x__sub0.01	x__sub0.01	x__sub0.01	x__sub0.01	x__sub0.01	x__sub0.01	0	0	0	0	0	0	0	0	0	0	0	0	0	0	1	1	1	0	1	1	0	0	1	0	0	0	2	1	0	0	0	2	0	0	0	3	0	0	0	0	0	0
4aa160d50724b4458b64418a3a67aa8c_rep;size=118;	x__sub0.01	x__sub0.01	x__sub0.01	x__sub0.01	x__sub0.01	x__sub0.01	x__sub0.01	0	0	0	0	0	0	0	0	0	0	0	0	0	0	0	0	0	0	0	0	0	0	0	0	0	0	0	0	0	0	0	0	0	0	0	1	0	0	0	0	0	0
36ce2555b83c27ee9d6f0d8e87eb560e_rep;size=117;	x__sub0.01	x__sub0.01	x__sub0.01	x__sub0.01	x__sub0.01	x__sub0.01	x__sub0.01	0	0	0	0	0	0	0	0	3	0	0	0	0	0	0	0	3	0	0	0	0	0	0	0	0	0	0	0	0	0	0	0	1	0	0	0	0	0	0	0	0	0
fbd21ae6a37436385ffa1b7a5832b37a_rep;size=116;	x__sub0.01	x__sub0.01	x__sub0.01	x__sub0.01	x__sub0.01	x__sub0.01	x__sub0.01	1	0	0	0	0	0	0	0	2	0	0	0	0	0	0	0	4	0	0	0	0	0	0	0	0	0	0	0	7	0	0	0	1	0	0	0	3	0	0	0	2	0
758c89cde70ab2cdec1f8997796a635e_rep;size=116;	x__sub0.01	x__sub0.01	x__sub0.01	x__sub0.01	x__sub0.01	x__sub0.01	x__sub0.01	0	0	0	0	0	0	0	0	0	0	0	0	0	0	0	0	1	0	0	0	0	0	0	0	0	0	0	0	0	0	0	0	0	0	0	0	0	0	0	0	0	0
cbe92e0a3d8bf7788e306ad960b215bf_rep;size=116;	x__sub0.01	x__sub0.01	x__sub0.01	x__sub0.01	x__sub0.01	x__sub0.01	x__sub0.01	0	0	0	0	0	0	0	0	0	0	0	0	0	0	0	0	0	0	0	0	0	0	0	0	0	0	0	0	0	0	0	0	0	0	0	0	0	0	0	0	0	0
4aea8b784493d707d8f62e842e3d0093_rep;size=116;	x__sub0.01	x__sub0.01	x__sub0.01	x__sub0.01	x__sub0.01	x__sub0.01	x__sub0.01	0	0	0	0	0	0	0	0	0	0	0	0	0	0	0	0	0	0	0	0	0	0	0	0	0	1	0	0	0	0	0	0	0	0	0	0	0	0	0	0	0	0
0aeecf7cb46b4edadecd9d91404da119_rep;size=116;	x__sub0.01	x__sub0.01	x__sub0.01	x__sub0.01	x__sub0.01	x__sub0.01	x__sub0.01	0	0	0	0	0	4	0	0	0	2	0	0	0	0	0	0	0	0	0	0	0	0	2	0	0	0	0	1	0	0	0	0	0	0	0	0	0	0	0	0	0	0
f6b75928493d503f0e59176aab59b7e2_rep;size=116;	x__sub0.01	x__sub0.01	x__sub0.01	x__sub0.01	x__sub0.01	x__sub0.01	x__sub0.01	0	0	0	0	0	0	0	0	1	0	0	0	2	0	0	0	0	0	0	0	1	0	0	0	0	0	0	0	0	0	0	0	0	0	0	0	1	0	0	0	0	0
6df5bfafbea75bfc2ff58571cc26fecb_rep;size=116;	x__sub0.01	x__sub0.01	x__sub0.01	x__sub0.01	x__sub0.01	x__sub0.01	x__sub0.01	0	0	0	0	0	0	0	0	0	0	0	0	0	0	0	0	0	0	0	0	0	0	0	0	0	0	0	0	0	0	0	0	0	0	0	0	0	0	0	0	0	0
9e7798910967bec20f18ee4af8bbdf01_rep;size=115;	x__sub0.01	x__sub0.01	x__sub0.01	x__sub0.01	x__sub0.01	x__sub0.01	x__sub0.01	1	0	0	0	4	0	0	0	0	0	0	0	1	0	0	0	1	0	0	0	0	0	0	0	0	0	0	0	0	0	0	1	0	0	0	0	2	0	0	0	3	0
042f6fabe049942832df3ee439cbdb7e_rep;size=115;	x__sub0.01	x__sub0.01	x__sub0.01	x__sub0.01	x__sub0.01	x__sub0.01	x__sub0.01	1	2	5	0	2	4	1	0	1	0	1	0	2	2	2	12	4	1	2	6	1	1	1	1	0	0	0	1	2	0	0	1	0	0	1	0	1	1	0	3	1	0
bc3c4a11aedc61634a2c6977b6a046b2_rep;size=115;	x__sub0.01	x__sub0.01	x__sub0.01	x__sub0.01	x__sub0.01	x__sub0.01	x__sub0.01	0	0	0	0	0	0	0	0	0	0	0	0	0	0	0	0	0	0	0	0	0	0	0	0	0	0	0	0	0	0	0	0	0	0	0	0	0	0	0	0	0	0
1189cc2a3a2695134e0deb658637a757_rep;size=115;	x__sub0.01	x__sub0.01	x__sub0.01	x__sub0.01	x__sub0.01	x__sub0.01	x__sub0.01	0	0	0	0	0	0	0	0	0	0	0	0	0	0	0	0	0	0	0	0	0	0	0	0	2	0	0	0	0	0	0	0	0	0	0	0	0	0	0	0	0	0
32134b38611b10a3e7e9fbf27f9fb34c_rep;size=115;	x__sub0.01	x__sub0.01	x__sub0.01	x__sub0.01	x__sub0.01	x__sub0.01	x__sub0.01	2	0	0	0	6	0	0	0	1	0	0	0	4	0	0	0	5	0	0	0	0	0	0	0	1	0	0	0	1	0	0	0	2	0	0	0	5	0	0	0	2	0
db30319a5edfd4388bb4d6d8d7475170_rep;size=115;	x__sub0.01	x__sub0.01	x__sub0.01	x__sub0.01	x__sub0.01	x__sub0.01	x__sub0.01	0	0	0	0	0	0	0	0	0	0	0	0	0	1	1	0	0	0	0	0	0	0	0	0	0	0	0	0	0	0	0	0	0	0	0	0	0	0	0	0	0	0
9ab5632a9cd00cb7ebb894d03f0795ef_rep;size=115;	x__sub0.01	x__sub0.01	x__sub0.01	x__sub0.01	x__sub0.01	x__sub0.01	x__sub0.01	0	0	0	0	0	0	0	0	0	0	0	0	0	0	0	0	0	0	0	0	0	0	0	0	0	0	0	0	0	0	0	0	0	0	0	0	0	0	0	0	0	0
9260276986d7f36fff08b54d72de505a_rep;size=114;	x__sub0.01	x__sub0.01	x__sub0.01	x__sub0.01	x__sub0.01	x__sub0.01	x__sub0.01	0	0	0	0	0	0	0	0	0	0	0	0	0	0	0	0	0	0	0	0	0	0	0	0	0	0	0	0	0	0	0	0	0	0	0	0	0	0	0	0	0	0
a7c2ba2e7b65c8e00e37b6647bf9c361_rep;size=114;	x__sub0.01	x__sub0.01	x__sub0.01	x__sub0.01	x__sub0.01	x__sub0.01	x__sub0.01	3	0	0	0	2	0	0	0	0	0	0	0	2	0	0	0	0	0	0	0	4	0	0	0	0	0	0	0	2	0	0	0	0	0	0	0	5	0	0	0	0	0
38353b3189a8b90fb8d44638ca9fdf3c_rep;size=114;	x__sub0.01	x__sub0.01	x__sub0.01	x__sub0.01	x__sub0.01	x__sub0.01	x__sub0.01	0	0	0	0	0	0	0	0	0	0	0	0	0	0	0	0	0	0	0	0	0	0	0	0	0	0	0	0	0	0	0	0	0	0	0	0	0	0	0	0	0	0
a1b65dd3ff37d464589aca9cbe9c1751_rep;size=113;	x__sub0.01	x__sub0.01	x__sub0.01	x__sub0.01	x__sub0.01	x__sub0.01	x__sub0.01	0	0	0	0	6	0	0	0	0	0	0	0	0	0	0	0	3	0	0	0	0	0	0	0	0	0	0	0	0	0	0	0	0	0	0	0	5	0	0	0	2	0
d4fba53236b3b071b698ffa30c7e3ad9_rep;size=113;	x__sub0.01	x__sub0.01	x__sub0.01	x__sub0.01	x__sub0.01	x__sub0.01	x__sub0.01	0	0	0	0	0	0	0	0	0	0	0	0	0	0	0	0	0	0	0	0	0	0	0	0	0	0	0	0	0	0	0	0	0	0	0	0	0	0	0	0	0	0
1b65426049bc4587ca05b396c026da90_rep;size=113;	x__sub0.01	x__sub0.01	x__sub0.01	x__sub0.01	x__sub0.01	x__sub0.01	x__sub0.01	0	0	0	0	0	0	1	0	0	0	0	0	0	0	0	0	0	0	0	0	0	0	0	0	0	0	0	0	0	0	0	0	0	0	0	0	0	0	1	0	0	0
a0409dee6c4b7f246b522a502b7caf84_rep;size=112;	x__sub0.01	x__sub0.01	x__sub0.01	x__sub0.01	x__sub0.01	x__sub0.01	x__sub0.01	0	0	0	0	0	0	0	0	0	0	0	0	0	0	0	0	0	0	0	0	0	0	0	0	0	0	0	0	0	0	0	0	0	0	0	0	0	0	0	0	0	0
0b2d963f8a0f2d75b9b423783cfc6a00_rep;size=112;	x__sub0.01	x__sub0.01	x__sub0.01	x__sub0.01	x__sub0.01	x__sub0.01	x__sub0.01	3	0	0	0	0	0	0	0	2	0	0	0	3	0	0	0	0	0	0	0	2	0	0	0	1	0	0	0	0	0	0	0	0	0	0	0	5	0	0	0	2	0
734456787e4bacbc70ab889b86f8bcc5_rep;size=112;	x__sub0.01	x__sub0.01	x__sub0.01	x__sub0.01	x__sub0.01	x__sub0.01	x__sub0.01	0	1	0	1	0	0	1	0	0	1	0	0	0	1	0	1	0	0	0	0	0	0	0	1	0	0	0	0	0	0	1	1	0	1	1	1	0	0	0	0	0	0
25bc4af89e2a6b226b076bb1960910d5_rep;size=112;	x__sub0.01	x__sub0.01	x__sub0.01	x__sub0.01	x__sub0.01	x__sub0.01	x__sub0.01	0	0	1	3	0	1	0	2	0	0	0	0	0	0	0	1	0	0	0	0	0	0	0	3	0	0	0	0	0	0	0	2	1	0	0	1	0	0	0	1	0	0
2e3074adcc903c2b4f2723a558b2fd0d_rep;size=111;	x__sub0.01	x__sub0.01	x__sub0.01	x__sub0.01	x__sub0.01	x__sub0.01	x__sub0.01	0	0	0	0	0	0	0	0	0	0	0	0	0	0	0	0	0	0	0	0	0	0	0	0	0	0	0	0	0	0	0	0	0	0	0	0	0	0	0	0	0	0
a4a49e02bbbdb68b69f89368ac137d05_rep;size=111;	x__sub0.01	x__sub0.01	x__sub0.01	x__sub0.01	x__sub0.01	x__sub0.01	x__sub0.01	0	0	0	0	0	0	0	0	0	0	0	0	0	0	0	0	0	0	0	0	0	0	0	0	0	0	0	0	0	0	0	0	0	0	0	0	0	0	0	0	0	0
409c4308498fbc7ec01343b7c36f8000_rep;size=111;	x__sub0.01	x__sub0.01	x__sub0.01	x__sub0.01	x__sub0.01	x__sub0.01	x__sub0.01	0	0	0	0	0	0	0	0	0	0	0	0	0	0	0	0	2	0	0	0	0	0	0	0	0	0	0	0	1	0	0	0	0	0	0	0	0	0	0	0	2	0
fe731cdc8fff01d5ceb9b42835394f81_rep;size=110;	x__sub0.01	x__sub0.01	x__sub0.01	x__sub0.01	x__sub0.01	x__sub0.01	x__sub0.01	0	0	0	0	0	0	0	0	1	0	0	0	0	0	0	0	0	0	0	0	0	0	0	0	3	0	0	0	0	0	0	0	0	0	0	0	0	0	0	0	0	0
4fc4c82b6f3bbfa57192e57e8d6662b4_rep;size=110;	x__sub0.01	x__sub0.01	x__sub0.01	x__sub0.01	x__sub0.01	x__sub0.01	x__sub0.01	0	0	0	0	1	0	0	0	0	0	0	0	0	0	0	0	0	0	0	0	2	0	0	0	0	0	0	0	2	0	0	0	0	0	0	0	0	0	0	0	1	0
76ea0a11018d488efdc955270955f6fe_rep;size=110;	x__sub0.01	x__sub0.01	x__sub0.01	x__sub0.01	x__sub0.01	x__sub0.01	x__sub0.01	0	0	0	0	2	0	0	0	4	0	0	0	1	0	0	0	5	0	0	0	5	0	0	0	1	0	0	0	12	0	0	0	1	0	0	0	4	0	0	0	4	0
2ea308a4299a0d82ba3e286a191a4d09_rep;size=110;	x__sub0.01	x__sub0.01	x__sub0.01	x__sub0.01	x__sub0.01	x__sub0.01	x__sub0.01	1	0	0	0	3	0	0	0	1	0	0	0	2	0	0	0	1	0	0	0	0	0	0	0	1	0	0	0	2	0	0	0	4	0	0	0	1	0	0	0	5	0
7dccf82086153e4c9af1f44bec3ddcaa_rep;size=110;	x__sub0.01	x__sub0.01	x__sub0.01	x__sub0.01	x__sub0.01	x__sub0.01	x__sub0.01	0	0	0	0	0	0	0	0	0	0	0	0	0	0	0	1	0	0	1	1	0	0	0	1	0	2	6	8	0	0	1	4	0	0	0	0	0	0	1	4	0	0
de0d676b26a625a5abd2911daf173d2b_rep;size=110;	x__sub0.01	x__sub0.01	x__sub0.01	x__sub0.01	x__sub0.01	x__sub0.01	x__sub0.01	0	0	0	0	0	0	0	0	0	0	0	0	0	0	0	0	0	0	0	0	0	0	0	0	0	0	0	0	0	0	0	0	0	0	0	0	0	0	0	0	0	0
36d747608ead5c5ee6e03937d929a9f8_rep;size=110;	x__sub0.01	x__sub0.01	x__sub0.01	x__sub0.01	x__sub0.01	x__sub0.01	x__sub0.01	0	0	0	0	0	0	0	0	0	0	0	0	0	0	0	0	0	0	0	0	1	0	0	0	0	0	0	0	0	0	0	0	0	0	0	0	0	0	0	0	0	0
39bc71f10828cb93915f8fc3f7191086_rep;size=110;	x__sub0.01	x__sub0.01	x__sub0.01	x__sub0.01	x__sub0.01	x__sub0.01	x__sub0.01	0	0	0	0	0	0	0	0	0	0	0	0	0	0	0	0	0	0	0	0	0	0	0	0	0	1	0	0	0	0	0	0	0	0	0	0	0	0	0	0	0	0
4075caec930d361001364566a2449e79_rep;size=109;	x__sub0.01	x__sub0.01	x__sub0.01	x__sub0.01	x__sub0.01	x__sub0.01	x__sub0.01	0	0	0	0	0	0	0	0	0	0	0	0	0	0	0	0	0	0	0	0	0	0	0	0	0	0	0	0	0	0	0	0	0	0	0	0	0	0	0	0	0	0
a753e6212f3a7b9e481537a538573499_rep;size=109;	x__sub0.01	x__sub0.01	x__sub0.01	x__sub0.01	x__sub0.01	x__sub0.01	x__sub0.01	0	0	0	0	0	0	0	0	0	0	0	0	0	0	0	0	0	0	0	0	0	0	0	0	0	0	0	0	0	0	0	0	0	0	0	0	0	0	0	0	0	0
4d5593fcace0ab6247d9d1ed5c0c2244_rep;size=108;	x__sub0.01	x__sub0.01	x__sub0.01	x__sub0.01	x__sub0.01	x__sub0.01	x__sub0.01	1	0	0	0	0	0	0	0	0	0	0	0	5	0	0	0	4	0	0	0	4	0	0	0	1	0	0	0	1	0	0	0	1	0	0	0	1	0	0	0	0	0
102b4ed39d778023c3bfe7bed1483691_rep;size=108;	x__sub0.01	x__sub0.01	x__sub0.01	x__sub0.01	x__sub0.01	x__sub0.01	x__sub0.01	0	1	0	0	0	0	0	0	0	0	1	3	0	0	0	2	0	0	0	0	0	0	2	0	0	0	3	10	0	0	0	0	0	0	0	3	0	0	0	5	0	0
f648379b7cc295985cf467954c271e67_rep;size=108;	x__sub0.01	x__sub0.01	x__sub0.01	x__sub0.01	x__sub0.01	x__sub0.01	x__sub0.01	0	0	0	0	0	0	2	2	0	0	0	0	0	0	0	1	0	0	0	0	0	0	1	0	0	0	0	0	0	0	0	0	0	0	1	0	0	0	0	0	0	0
497e296d7b1a4395b0e7d3bafc1366c3_rep;size=107;	x__sub0.01	x__sub0.01	x__sub0.01	x__sub0.01	x__sub0.01	x__sub0.01	x__sub0.01	0	0	0	0	0	0	0	0	0	0	0	0	0	0	0	0	0	0	0	0	0	0	0	0	0	0	0	0	1	0	0	0	0	0	0	0	0	0	0	0	0	0
83b2e7945cdb0e4fb3b229ddc5fa165c_rep;size=107;	x__sub0.01	x__sub0.01	x__sub0.01	x__sub0.01	x__sub0.01	x__sub0.01	x__sub0.01	1	0	0	0	0	0	0	0	0	0	0	0	4	0	0	0	2	0	0	0	1	0	0	0	0	0	0	0	0	0	0	0	1	0	0	0	0	0	0	0	2	0
05ba9f824f2ae6b7031f570626bbba97_rep;size=107;	x__sub0.01	x__sub0.01	x__sub0.01	x__sub0.01	x__sub0.01	x__sub0.01	x__sub0.01	16	0	0	0	5	0	0	0	0	0	0	0	0	0	0	0	2	0	0	0	5	0	0	0	1	0	0	0	1	0	0	0	3	0	0	0	0	0	0	0	1	0
bb4604d95a3ead421f4f9bb1774d98eb_rep;size=107;	x__sub0.01	x__sub0.01	x__sub0.01	x__sub0.01	x__sub0.01	x__sub0.01	x__sub0.01	0	0	0	0	0	0	0	0	0	0	0	0	23	0	0	0	12	0	0	0	0	0	0	0	0	0	0	0	0	0	0	0	5	0	0	0	0	0	0	0	0	0
25d85d69f5c08dbfcaa4c7407008a288_rep;size=106;	x__sub0.01	x__sub0.01	x__sub0.01	x__sub0.01	x__sub0.01	x__sub0.01	x__sub0.01	0	0	0	0	0	0	0	0	0	0	0	0	0	0	0	0	0	0	0	0	0	0	0	0	3	0	0	0	0	0	0	0	0	0	0	0	0	0	0	0	0	0
ea38fb9c8362d4812af62676e7437745_rep;size=106;	x__sub0.01	x__sub0.01	x__sub0.01	x__sub0.01	x__sub0.01	x__sub0.01	x__sub0.01	0	0	0	0	0	0	0	0	0	0	0	0	0	0	0	0	0	0	0	0	0	0	0	0	0	0	0	0	0	0	0	0	0	0	0	0	0	0	0	0	0	0
a0e91c4a1abe3ce2f8c4adbf077a8dcc_rep;size=105;	x__sub0.01	x__sub0.01	x__sub0.01	x__sub0.01	x__sub0.01	x__sub0.01	x__sub0.01	0	0	0	0	3	0	0	0	1	0	0	0	8	0	0	0	0	0	0	0	4	0	0	0	1	0	0	0	0	0	0	0	1	0	0	0	11	0	0	0	3	0
791b0f5bac57bf10f2904279ca71ab59_rep;size=105;	x__sub0.01	x__sub0.01	x__sub0.01	x__sub0.01	x__sub0.01	x__sub0.01	x__sub0.01	0	0	0	0	0	0	0	0	2	0	0	0	0	0	0	0	3	0	0	0	2	0	0	0	0	0	0	0	3	0	0	0	1	0	0	0	0	0	0	0	3	0
a94e9010e50ddc48d78bc2f3787f5467_rep;size=105;	x__sub0.01	x__sub0.01	x__sub0.01	x__sub0.01	x__sub0.01	x__sub0.01	x__sub0.01	0	1	4	0	0	1	2	0	1	3	1	2	0	4	3	1	0	2	3	5	0	1	0	3	0	2	2	1	2	0	4	3	0	2	0	3	0	1	1	2	0	0
42890e4ece2bc6fe65d95668c6cc3531_rep;size=105;	x__sub0.01	x__sub0.01	x__sub0.01	x__sub0.01	x__sub0.01	x__sub0.01	x__sub0.01	0	0	0	0	0	0	0	0	0	0	0	0	0	0	0	0	0	0	0	0	0	0	0	0	0	0	0	0	0	0	0	0	0	0	0	0	0	0	0	0	0	0
deb9b5256462de638eedcc3f10a7e130_rep;size=105;	x__sub0.01	x__sub0.01	x__sub0.01	x__sub0.01	x__sub0.01	x__sub0.01	x__sub0.01	0	0	0	0	0	0	0	0	0	0	0	0	1	0	0	0	0	0	0	0	1	0	0	0	0	0	0	0	0	0	0	0	0	0	0	0	0	0	0	0	0	0
b51a77ccb6e58c07866b36dde956d525_rep;size=105;	x__sub0.01	x__sub0.01	x__sub0.01	x__sub0.01	x__sub0.01	x__sub0.01	x__sub0.01	0	0	0	0	0	0	0	0	0	0	0	0	0	0	0	0	0	0	0	0	0	0	0	0	0	0	0	0	0	0	0	0	0	0	0	0	0	0	0	0	0	0
b4fa9773adfff0938953e888b6ffffed_rep;size=104;	x__sub0.01	x__sub0.01	x__sub0.01	x__sub0.01	x__sub0.01	x__sub0.01	x__sub0.01	0	0	0	0	0	0	0	0	0	0	0	0	0	0	0	0	0	0	0	0	0	0	0	0	0	0	0	0	0	0	0	0	0	0	0	0	0	0	0	0	0	0
5f4dc463cd8df7cbc5c3950b8e0550a9_rep;size=104;	x__sub0.01	x__sub0.01	x__sub0.01	x__sub0.01	x__sub0.01	x__sub0.01	x__sub0.01	0	0	1	0	0	0	0	2	0	0	0	3	0	0	1	0	0	0	1	3	0	0	0	0	0	0	1	5	0	0	0	1	0	0	0	1	0	0	1	7	0	0
ec9fe76ea5a04c7803bcce6648fcd3c1_rep;size=104;	x__sub0.01	x__sub0.01	x__sub0.01	x__sub0.01	x__sub0.01	x__sub0.01	x__sub0.01	0	0	1	0	0	0	0	0	0	0	0	0	0	0	3	1	0	0	0	3	0	0	2	0	0	0	3	7	0	1	0	1	0	0	0	2	0	0	0	3	0	0
84718361cf964094350cb3edda5c8507_rep;size=103;	x__sub0.01	x__sub0.01	x__sub0.01	x__sub0.01	x__sub0.01	x__sub0.01	x__sub0.01	4	0	0	0	0	0	0	0	0	0	0	0	0	0	0	0	0	0	0	0	2	0	0	0	0	0	0	0	0	0	0	0	0	0	0	0	13	0	0	0	1	0
c06279edaa65e237e0c7f1dfcca1e1a8_rep;size=103;	x__sub0.01	x__sub0.01	x__sub0.01	x__sub0.01	x__sub0.01	x__sub0.01	x__sub0.01	0	0	0	0	0	0	1	0	0	0	0	1	0	0	3	0	0	0	0	0	0	0	2	3	0	1	2	8	0	0	0	2	0	0	0	2	0	0	1	1	0	0
f9ce49faa450474d47d470a86f4b3aa4_rep;size=103;	x__sub0.01	x__sub0.01	x__sub0.01	x__sub0.01	x__sub0.01	x__sub0.01	x__sub0.01	0	0	0	0	0	0	0	0	0	0	0	0	0	0	0	1	0	0	0	0	0	0	0	0	0	1	0	0	0	0	0	0	0	0	0	0	0	0	0	0	0	0
ed034b920857efad31e5617d1b6b1676_rep;size=103;	x__sub0.01	x__sub0.01	x__sub0.01	x__sub0.01	x__sub0.01	x__sub0.01	x__sub0.01	0	0	0	2	0	0	0	0	0	0	0	0	0	0	0	0	0	0	0	0	0	0	0	0	0	0	0	0	0	0	0	0	0	0	0	0	0	0	0	1	0	0
345cef4b71ee243040913a495bd1ab0a_rep;size=103;	x__sub0.01	x__sub0.01	x__sub0.01	x__sub0.01	x__sub0.01	x__sub0.01	x__sub0.01	0	0	0	0	0	0	0	0	0	0	0	0	0	0	0	0	0	0	0	0	0	0	0	0	0	0	0	0	0	0	0	0	0	0	0	0	0	0	0	0	0	0
e4e6e8353fc45096f766d29b19b99e1e_rep;size=102;	x__sub0.01	x__sub0.01	x__sub0.01	x__sub0.01	x__sub0.01	x__sub0.01	x__sub0.01	2	0	0	0	1	0	0	0	1	0	0	0	1	0	0	0	0	0	0	0	2	0	0	0	0	0	0	0	2	0	0	0	0	0	0	0	2	0	0	0	0	0
488cccf565e70891d0b24fa353c2e332_rep;size=102;	x__sub0.01	x__sub0.01	x__sub0.01	x__sub0.01	x__sub0.01	x__sub0.01	x__sub0.01	5	0	0	0	2	0	0	0	3	0	0	0	0	0	0	0	6	0	0	0	3	0	0	0	0	0	0	0	2	0	0	0	2	0	0	0	6	0	0	0	8	0
351f8b7874d6ab613760c2e602dde6ec_rep;size=102;	x__sub0.01	x__sub0.01	x__sub0.01	x__sub0.01	x__sub0.01	x__sub0.01	x__sub0.01	0	0	0	0	0	0	0	0	0	0	0	0	0	0	0	0	0	0	0	0	0	0	0	0	0	0	0	0	5	0	0	0	0	0	0	0	0	0	0	0	2	0
9c59888b98570eb25d53f1909b082f8d_rep;size=102;	x__sub0.01	x__sub0.01	x__sub0.01	x__sub0.01	x__sub0.01	x__sub0.01	x__sub0.01	2	0	0	0	0	0	0	0	2	0	0	0	1	0	0	0	0	0	0	0	3	0	0	0	0	0	0	0	4	0	0	0	2	0	0	0	2	0	0	0	3	0
d7428f292327349ed713dfade74c83e8_rep;size=102;	x__sub0.01	x__sub0.01	x__sub0.01	x__sub0.01	x__sub0.01	x__sub0.01	x__sub0.01	0	0	0	0	0	0	0	0	0	0	0	1	0	0	0	0	0	0	0	0	0	0	0	0	0	0	2	1	0	0	2	0	0	0	1	0	0	0	0	1	0	0
bbbc739e5a6dc4a118f983b5a79558d0_rep;size=102;	x__sub0.01	x__sub0.01	x__sub0.01	x__sub0.01	x__sub0.01	x__sub0.01	x__sub0.01	0	2	2	1	0	0	0	0	0	0	0	1	0	1	7	1	0	0	0	4	0	0	2	2	0	5	5	9	0	2	3	2	1	2	2	3	0	0	2	11	0	0
0ec79244f92b8891f85d3151eba2c73f_rep;size=101;	x__sub0.01	x__sub0.01	x__sub0.01	x__sub0.01	x__sub0.01	x__sub0.01	x__sub0.01	0	0	0	0	0	0	0	0	0	0	0	0	0	0	0	0	0	0	0	0	10	0	0	0	0	0	0	0	0	0	0	0	9	0	0	0	28	0	0	0	0	0
8e322dbb9f5c67f8605b1f23eee37d74_rep;size=101;	x__sub0.01	x__sub0.01	x__sub0.01	x__sub0.01	x__sub0.01	x__sub0.01	x__sub0.01	0	0	0	0	0	0	0	0	0	0	0	0	0	0	0	0	0	0	0	0	0	0	0	0	0	0	0	0	0	0	0	0	0	0	0	0	0	0	0	0	0	0
26a11c9de8c4cc70ebdb55338841711c_rep;size=101;	x__sub0.01	x__sub0.01	x__sub0.01	x__sub0.01	x__sub0.01	x__sub0.01	x__sub0.01	0	0	0	0	0	0	0	0	0	0	0	0	0	0	0	0	0	0	0	0	0	0	0	0	0	0	0	0	0	0	0	0	0	0	0	0	0	0	0	0	0	0
288f62c887d67d69bc0f0af0b50776c1_rep;size=100;	x__sub0.01	x__sub0.01	x__sub0.01	x__sub0.01	x__sub0.01	x__sub0.01	x__sub0.01	0	0	0	0	0	0	0	0	0	0	0	0	0	0	0	0	0	0	0	0	0	0	0	0	0	0	0	0	0	0	0	0	0	0	0	0	0	0	0	0	1	0
32663ec9ce76486458d76b7923f2b7f9_rep;size=100;	x__sub0.01	x__sub0.01	x__sub0.01	x__sub0.01	x__sub0.01	x__sub0.01	x__sub0.01	1	0	0	0	1	0	0	0	1	0	0	0	3	0	0	0	1	0	0	0	1	0	0	0	0	0	0	0	0	0	0	0	0	0	0	0	4	0	0	0	5	0
0dac256d0ea1d550571269d2712c526b_rep;size=100;	x__sub0.01	x__sub0.01	x__sub0.01	x__sub0.01	x__sub0.01	x__sub0.01	x__sub0.01	0	0	0	0	0	0	0	0	0	0	0	0	0	0	0	0	0	0	0	0	0	0	0	0	0	0	0	0	0	0	0	0	0	0	0	0	0	0	0	0	0	0
6f7e8cc3b02727ee6565e86e181b5e5c_rep;size=100;	x__sub0.01	x__sub0.01	x__sub0.01	x__sub0.01	x__sub0.01	x__sub0.01	x__sub0.01	0	0	0	0	0	0	0	0	0	0	0	0	0	0	0	0	0	0	0	0	0	0	1	0	0	0	0	1	0	0	0	0	0	0	0	1	0	0	0	0	0	0
80674b4307da854c7f6a8b9f149d79f8_rep;size=100;	x__sub0.01	x__sub0.01	x__sub0.01	x__sub0.01	x__sub0.01	x__sub0.01	x__sub0.01	0	0	0	0	0	0	1	1	0	0	0	0	0	0	0	0	0	0	0	0	0	0	0	0	0	0	0	0	0	1	0	0	0	0	0	0	0	0	0	1	0	0
3ebc921c423f3155b333ba65d0a70fd3_rep;size=100;	x__sub0.01	x__sub0.01	x__sub0.01	x__sub0.01	x__sub0.01	x__sub0.01	x__sub0.01	0	0	0	0	3	0	0	0	0	0	0	0	2	0	0	0	0	0	0	0	8	0	0	0	0	0	0	0	3	0	0	0	1	0	0	0	0	0	0	0	0	0
def5109da51ccf60c7f12af0dbfa3f5e_rep;size=100;	x__sub0.01	x__sub0.01	x__sub0.01	x__sub0.01	x__sub0.01	x__sub0.01	x__sub0.01	0	0	0	0	0	0	0	0	0	0	0	0	0	0	0	0	0	0	0	0	0	0	0	0	0	0	0	0	0	0	0	0	0	0	0	0	0	0	0	0	0	0
f19758721944c218b64b00741025e9c9_rep;size=99;	x__sub0.01	x__sub0.01	x__sub0.01	x__sub0.01	x__sub0.01	x__sub0.01	x__sub0.01	0	0	0	0	0	0	0	0	0	0	0	0	0	0	0	0	0	0	0	0	0	0	0	0	0	0	0	0	0	0	0	0	0	0	0	0	0	0	0	0	0	0
c4e0dae51e8d4d93bbf323c470bebfd7_rep;size=99;	x__sub0.01	x__sub0.01	x__sub0.01	x__sub0.01	x__sub0.01	x__sub0.01	x__sub0.01	2	0	0	0	1	0	0	0	3	0	0	0	4	0	0	0	0	0	0	0	3	0	0	0	2	0	0	0	3	0	0	0	1	0	0	0	6	0	0	0	0	0
111e2167b6d378c32d9a68197ee5e1b3_rep;size=98;	x__sub0.01	x__sub0.01	x__sub0.01	x__sub0.01	x__sub0.01	x__sub0.01	x__sub0.01	3	0	0	0	4	0	0	0	3	0	0	0	2	0	0	0	3	0	0	0	6	0	0	0	2	0	0	0	1	0	0	0	1	0	0	0	1	0	0	0	0	0
9b87445117d2fad3e9ab3759c0727193_rep;size=98;	x__sub0.01	x__sub0.01	x__sub0.01	x__sub0.01	x__sub0.01	x__sub0.01	x__sub0.01	0	0	0	0	2	0	0	0	2	0	0	0	3	0	0	0	5	0	0	0	0	0	0	0	6	0	0	0	8	0	0	0	0	0	0	0	0	0	0	0	3	0
dc85d93db780e90e8705b98801247d20_rep;size=98;	x__sub0.01	x__sub0.01	x__sub0.01	x__sub0.01	x__sub0.01	x__sub0.01	x__sub0.01	0	0	0	0	4	0	0	0	0	0	0	0	3	1	0	0	0	0	0	0	0	0	0	0	0	0	0	0	0	0	0	0	4	0	0	0	0	0	0	0	0	0
f9ab28b46eca38903f447404191fb815_rep;size=98;	x__sub0.01	x__sub0.01	x__sub0.01	x__sub0.01	x__sub0.01	x__sub0.01	x__sub0.01	0	0	0	0	0	0	0	0	1	0	0	0	0	0	0	0	1	0	0	0	0	0	0	0	1	0	0	0	0	0	0	0	0	0	0	0	0	0	0	0	0	0
327db84c3d06eda18df1d77ed4188890_rep;size=97;	x__sub0.01	x__sub0.01	x__sub0.01	x__sub0.01	x__sub0.01	x__sub0.01	x__sub0.01	0	0	1	0	0	1	0	1	0	0	0	0	0	0	0	0	0	0	0	0	0	0	0	0	0	0	0	0	0	0	0	0	0	0	0	0	0	0	0	0	0	0
cc377f3ec2cded866666596daaee0933_rep;size=97;	x__sub0.01	x__sub0.01	x__sub0.01	x__sub0.01	x__sub0.01	x__sub0.01	x__sub0.01	0	4	3	0	0	3	2	3	0	2	0	3	1	0	1	1	0	0	1	3	0	0	1	1	0	1	1	0	1	1	0	4	1	1	0	0	0	0	1	4	1	1
c491eb196ffe8775e30b09a5380c5ade_rep;size=97;	x__sub0.01	x__sub0.01	x__sub0.01	x__sub0.01	x__sub0.01	x__sub0.01	x__sub0.01	0	0	0	0	0	0	0	0	0	0	0	0	0	0	0	0	0	0	0	0	0	0	0	0	0	0	0	0	0	0	0	0	0	0	0	0	0	0	0	0	0	0
3ef8ce62ec1eedc6d5409040686dd01c_rep;size=97;	x__sub0.01	x__sub0.01	x__sub0.01	x__sub0.01	x__sub0.01	x__sub0.01	x__sub0.01	0	0	0	0	0	0	0	0	0	0	0	0	0	0	0	0	0	0	0	0	0	0	0	0	0	0	0	0	0	0	0	0	0	0	0	0	0	0	0	0	0	0
d1f05f871e66448da5482b31976ce4c6_rep;size=96;	x__sub0.01	x__sub0.01	x__sub0.01	x__sub0.01	x__sub0.01	x__sub0.01	x__sub0.01	0	2	3	0	1	2	3	2	0	0	2	1	0	0	2	1	0	0	0	3	0	0	3	4	1	0	2	2	0	1	3	0	0	0	3	1	0	1	2	0	0	5
64fc0ade62f2ab81514f408e098ec3d7_rep;size=96;	x__sub0.01	x__sub0.01	x__sub0.01	x__sub0.01	x__sub0.01	x__sub0.01	x__sub0.01	0	0	0	0	1	0	0	0	5	0	0	0	0	0	0	0	1	0	0	0	1	0	0	0	4	0	0	0	0	0	0	0	3	0	0	0	1	0	0	0	2	0
c33d9d542f73b28a8cbe671583c5730b_rep;size=95;	x__sub0.01	x__sub0.01	x__sub0.01	x__sub0.01	x__sub0.01	x__sub0.01	x__sub0.01	0	0	0	0	1	0	0	0	0	0	0	0	0	0	0	0	0	0	0	0	0	0	0	0	0	0	0	0	0	0	0	0	0	0	0	0	0	0	0	0	0	0
4030c3832998d95c5bd30f05840ca67d_rep;size=95;	x__sub0.01	x__sub0.01	x__sub0.01	x__sub0.01	x__sub0.01	x__sub0.01	x__sub0.01	0	0	1	2	0	1	0	1	0	1	0	0	1	1	1	1	1	0	0	2	0	0	0	0	0	1	2	0	1	0	1	3	0	3	0	0	1	1	0	3	0	0
9d637afe5b636e48a28c701e7250e5cc_rep;size=95;	x__sub0.01	x__sub0.01	x__sub0.01	x__sub0.01	x__sub0.01	x__sub0.01	x__sub0.01	0	0	0	0	0	0	0	0	0	0	0	1	0	0	1	0	0	0	0	0	0	0	0	0	0	0	0	0	0	0	0	0	0	0	3	0	0	0	0	3	0	1
92546bde1341ed0a0268a7144e78badc_rep;size=94;	x__sub0.01	x__sub0.01	x__sub0.01	x__sub0.01	x__sub0.01	x__sub0.01	x__sub0.01	0	0	0	0	3	0	0	0	2	0	0	0	11	0	0	0	2	0	0	1	6	0	0	0	0	0	0	0	3	0	0	0	1	0	0	0	3	0	0	0	5	0
740f71cbe1f060158ed934a32be3c025_rep;size=94;	x__sub0.01	x__sub0.01	x__sub0.01	x__sub0.01	x__sub0.01	x__sub0.01	x__sub0.01	0	1	3	1	0	2	4	0	0	1	4	8	0	0	1	3	0	0	1	2	0	0	2	2	0	0	3	3	0	1	1	2	0	0	3	2	0	0	2	2	0	0
6a3c78a3f0a36257b79176a8ea7b1a2a_rep;size=94;	x__sub0.01	x__sub0.01	x__sub0.01	x__sub0.01	x__sub0.01	x__sub0.01	x__sub0.01	0	0	0	0	0	0	0	0	0	0	0	0	0	0	0	0	0	0	0	0	0	0	0	0	0	0	0	0	0	0	0	0	0	0	0	0	0	0	0	0	0	0
1467fc86af3fb21d4b925a459a108b7a_rep;size=92;	x__sub0.01	x__sub0.01	x__sub0.01	x__sub0.01	x__sub0.01	x__sub0.01	x__sub0.01	0	0	0	0	0	0	0	0	0	0	0	0	0	0	0	0	0	0	0	0	0	0	0	0	0	0	0	0	0	0	0	0	0	0	0	0	0	0	0	0	0	0
92687f2bfbf4bfec4d2878d230de63da_rep;size=92;	x__sub0.01	x__sub0.01	x__sub0.01	x__sub0.01	x__sub0.01	x__sub0.01	x__sub0.01	1	0	0	0	1	0	0	0	4	0	0	0	3	0	0	0	2	0	0	0	4	0	0	0	2	0	0	0	5	0	0	0	1	0	0	0	4	0	0	0	1	0
4244968470bee22edc6859f84ab82d51_rep;size=91;	x__sub0.01	x__sub0.01	x__sub0.01	x__sub0.01	x__sub0.01	x__sub0.01	x__sub0.01	2	0	0	0	1	0	0	0	2	0	0	0	4	0	0	0	0	0	0	0	1	0	1	0	1	0	0	0	2	0	0	0	0	0	0	0	4	0	0	0	1	0
18f7dda7afa3b88034fd2c7b515e78eb_rep;size=91;	x__sub0.01	x__sub0.01	x__sub0.01	x__sub0.01	x__sub0.01	x__sub0.01	x__sub0.01	0	0	0	0	0	0	0	0	0	0	0	0	0	0	0	0	0	0	0	0	0	0	0	0	0	0	0	0	0	0	0	0	0	0	0	0	0	0	0	0	0	0
5b2c013e03f3d3ad04300b2444405aa6_rep;size=91;	x__sub0.01	x__sub0.01	x__sub0.01	x__sub0.01	x__sub0.01	x__sub0.01	x__sub0.01	0	1	1	0	0	0	0	0	0	3	0	0	0	2	3	0	0	0	2	4	0	2	4	3	0	2	6	6	0	0	4	5	0	2	0	3	0	0	0	7	0	0
b2afad13ffc1f157ff0bf638e24910cd_rep;size=90;	x__sub0.01	x__sub0.01	x__sub0.01	x__sub0.01	x__sub0.01	x__sub0.01	x__sub0.01	0	0	0	0	0	0	0	0	0	0	0	0	2	0	0	0	1	0	0	0	2	0	0	0	1	0	0	0	0	0	0	0	0	0	0	0	0	0	0	0	3	0
0520fa0bb0ceb38c8e2bc514ff3738c3_rep;size=90;	x__sub0.01	x__sub0.01	x__sub0.01	x__sub0.01	x__sub0.01	x__sub0.01	x__sub0.01	1	0	0	0	7	0	0	0	2	0	0	0	0	0	0	0	0	0	0	0	0	0	0	0	0	0	0	0	3	0	0	0	1	0	0	0	0	0	0	0	0	0
d8973e21dbfd56dc040e4838fbb40ec6_rep;size=90;	x__sub0.01	x__sub0.01	x__sub0.01	x__sub0.01	x__sub0.01	x__sub0.01	x__sub0.01	0	1	0	0	0	0	0	0	0	0	0	0	0	0	1	2	0	0	1	0	0	0	0	1	0	1	0	3	0	0	0	2	0	0	0	6	0	0	2	2	0	0
20115c773018e5c70069bec9d82c4fc8_rep;size=90;	x__sub0.01	x__sub0.01	x__sub0.01	x__sub0.01	x__sub0.01	x__sub0.01	x__sub0.01	0	0	0	2	0	1	0	0	0	3	0	0	0	2	0	3	0	0	0	1	0	0	0	1	0	2	9	12	0	0	0	8	0	5	0	1	0	0	3	12	0	0
0d28994d32feaae70d96fc9d1509f956_rep;size=90;	x__sub0.01	x__sub0.01	x__sub0.01	x__sub0.01	x__sub0.01	x__sub0.01	x__sub0.01	0	0	0	0	0	0	0	0	0	0	0	0	0	0	0	0	0	0	0	0	0	0	0	0	0	0	0	0	0	0	0	0	0	0	0	0	0	0	0	0	0	0
6c598d5cdf294fa2c71e05829ec514d8_rep;size=90;	x__sub0.01	x__sub0.01	x__sub0.01	x__sub0.01	x__sub0.01	x__sub0.01	x__sub0.01	0	0	0	0	1	0	0	0	3	0	0	0	0	0	0	0	2	0	0	0	3	0	0	0	0	0	0	0	3	0	0	0	0	0	0	0	1	0	0	0	3	0
de138aa66703654a8968e658489006e9_rep;size=90;	x__sub0.01	x__sub0.01	x__sub0.01	x__sub0.01	x__sub0.01	x__sub0.01	x__sub0.01	0	1	1	2	0	0	1	0	0	0	0	0	0	1	2	3	0	2	0	0	0	0	1	0	0	3	5	13	0	2	4	8	0	4	1	1	0	1	2	7	0	0
67554c8dc9f65b4629cc6960bf1473d9_rep;size=90;	x__sub0.01	x__sub0.01	x__sub0.01	x__sub0.01	x__sub0.01	x__sub0.01	x__sub0.01	0	0	0	0	0	0	0	0	0	0	0	0	0	0	0	0	0	0	0	2	0	0	0	0	0	0	0	0	0	0	0	0	0	0	0	0	0	0	0	0	0	0
c2d821323072fbc0ffbf5162d73318c8_rep;size=89;	x__sub0.01	x__sub0.01	x__sub0.01	x__sub0.01	x__sub0.01	x__sub0.01	x__sub0.01	0	0	0	0	0	0	0	0	0	0	0	0	0	0	0	0	0	0	0	0	0	0	0	0	2	0	0	0	0	0	0	0	0	0	0	0	0	0	0	0	16	0
a389e3da3bbd544801a66aa8b96a9a40_rep;size=89;	x__sub0.01	x__sub0.01	x__sub0.01	x__sub0.01	x__sub0.01	x__sub0.01	x__sub0.01	0	0	0	0	1	0	0	0	7	0	0	0	1	0	1	0	1	0	0	0	0	0	0	0	0	0	0	0	2	0	0	0	1	0	0	0	7	0	0	0	0	0
69f5bce3a3100af43f14d6399b06565b_rep;size=89;	x__sub0.01	x__sub0.01	x__sub0.01	x__sub0.01	x__sub0.01	x__sub0.01	x__sub0.01	0	0	1	1	0	0	0	0	0	0	0	1	0	0	0	0	0	0	0	0	0	0	0	0	0	0	0	0	0	0	0	0	0	0	0	0	0	0	0	0	0	0
da3d76f78e94fb54b6448e935e3c37b2_rep;size=88;	x__sub0.01	x__sub0.01	x__sub0.01	x__sub0.01	x__sub0.01	x__sub0.01	x__sub0.01	1	0	1	0	0	0	0	1	0	0	1	1	0	0	0	0	0	0	1	0	0	0	0	0	0	0	0	0	0	0	0	1	0	0	0	1	0	0	1	0	0	0
959e4cd914579d3ec45e62f4eda84a56_rep;size=88;	x__sub0.01	x__sub0.01	x__sub0.01	x__sub0.01	x__sub0.01	x__sub0.01	x__sub0.01	0	0	1	0	0	0	0	0	0	0	0	0	0	0	0	0	0	0	0	0	0	0	1	0	0	0	0	0	0	0	0	0	0	0	0	0	0	0	0	1	0	0
e9554d5f4a4ed42001c04ec573a34c63_rep;size=88;	x__sub0.01	x__sub0.01	x__sub0.01	x__sub0.01	x__sub0.01	x__sub0.01	x__sub0.01	0	0	0	0	0	0	0	0	0	0	0	0	0	0	0	0	0	0	0	0	0	0	0	1	0	0	0	0	0	0	0	0	0	0	0	0	0	0	0	0	0	0
0cfc3b26d7592de256e2c54a4d21d3e0_rep;size=87;	x__sub0.01	x__sub0.01	x__sub0.01	x__sub0.01	x__sub0.01	x__sub0.01	x__sub0.01	0	0	0	0	0	0	0	0	0	0	0	0	0	0	0	0	0	0	0	0	0	0	0	1	0	0	0	0	0	0	0	0	0	0	0	0	0	0	0	0	0	0
5546669b453b7538c7520f82b385b8bf_rep;size=87;	x__sub0.01	x__sub0.01	x__sub0.01	x__sub0.01	x__sub0.01	x__sub0.01	x__sub0.01	0	0	0	0	0	0	0	1	0	0	0	0	0	0	0	0	0	0	0	0	0	0	0	0	0	0	0	0	0	0	0	0	0	0	0	0	0	0	0	0	0	0
ac88cc4bccef26c1247a4fe49907bb0c_rep;size=86;	x__sub0.01	x__sub0.01	x__sub0.01	x__sub0.01	x__sub0.01	x__sub0.01	x__sub0.01	3	0	0	0	1	0	0	0	0	0	0	0	5	0	0	0	6	0	0	0	1	0	0	0	1	0	0	0	1	0	0	0	0	0	0	0	1	0	0	0	2	0
4529e6f658e7dc2d6df032335e26e7d6_rep;size=86;	x__sub0.01	x__sub0.01	x__sub0.01	x__sub0.01	x__sub0.01	x__sub0.01	x__sub0.01	1	0	0	0	1	0	0	0	0	0	0	0	0	0	0	0	0	0	0	0	3	0	0	0	0	0	0	0	0	0	0	0	0	0	0	0	0	0	0	0	1	0
bfbf93fb20f4f61acdd83a3e143f5241_rep;size=86;	x__sub0.01	x__sub0.01	x__sub0.01	x__sub0.01	x__sub0.01	x__sub0.01	x__sub0.01	0	2	2	0	0	0	0	0	0	1	0	0	0	2	0	0	0	1	0	0	0	0	0	2	0	1	1	2	0	1	1	1	0	0	3	1	0	0	1	1	0	4
04a0653a5878ba0814e74e9389608b54_rep;size=86;	x__sub0.01	x__sub0.01	x__sub0.01	x__sub0.01	x__sub0.01	x__sub0.01	x__sub0.01	0	0	0	1	0	1	0	0	0	0	0	0	0	0	0	0	0	0	0	0	0	0	0	0	0	0	0	0	0	0	0	0	0	0	0	0	0	0	0	1	0	0
4771f2a199ee6abbf9f12cf607130036_rep;size=86;	x__sub0.01	x__sub0.01	x__sub0.01	x__sub0.01	x__sub0.01	x__sub0.01	x__sub0.01	0	0	2	0	0	0	0	0	0	0	0	0	0	0	0	0	0	0	0	0	0	0	0	0	0	0	0	0	0	0	0	0	0	0	0	0	0	0	0	0	0	0
c0836660f6f7e45743e18b3951fcef6b_rep;size=85;	x__sub0.01	x__sub0.01	x__sub0.01	x__sub0.01	x__sub0.01	x__sub0.01	x__sub0.01	1	2	1	0	0	0	0	1	0	0	0	0	1	1	0	2	5	0	0	0	0	0	1	0	1	0	0	1	0	2	0	0	0	0	0	0	0	0	0	0	1	0
1f2e7f2340b8755f3e99ebe128f41ffc_rep;size=85;	x__sub0.01	x__sub0.01	x__sub0.01	x__sub0.01	x__sub0.01	x__sub0.01	x__sub0.01	1	0	0	0	5	0	0	0	2	0	0	0	1	0	0	0	6	0	0	0	0	0	0	0	1	0	0	0	0	0	0	0	0	0	0	0	3	0	0	0	0	0
5c6ce33874f24791e6f1f12e1ad5ebdb_rep;size=85;	x__sub0.01	x__sub0.01	x__sub0.01	x__sub0.01	x__sub0.01	x__sub0.01	x__sub0.01	1	0	0	0	0	0	0	0	3	0	0	0	1	0	0	0	3	0	0	0	2	0	0	0	1	0	0	0	0	0	0	0	0	0	0	0	1	0	0	0	1	0
c6b41f052a5957aaec4134e0b20e9299_rep;size=85;	x__sub0.01	x__sub0.01	x__sub0.01	x__sub0.01	x__sub0.01	x__sub0.01	x__sub0.01	2	0	0	0	1	0	0	0	0	0	0	0	1	0	0	0	1	0	0	0	0	0	0	0	0	0	0	0	0	0	0	0	0	0	0	0	0	0	0	0	0	0
a47a088f0b0c0e5f259d1d556c8675af_rep;size=85;	x__sub0.01	x__sub0.01	x__sub0.01	x__sub0.01	x__sub0.01	x__sub0.01	x__sub0.01	0	0	0	0	0	0	0	0	0	0	0	0	0	0	0	0	0	0	0	0	0	0	0	0	0	0	0	0	0	0	0	0	0	0	0	0	0	0	0	0	0	0
8609d46ff642a487dce4d8bf951cb8fb_rep;size=85;	x__sub0.01	x__sub0.01	x__sub0.01	x__sub0.01	x__sub0.01	x__sub0.01	x__sub0.01	0	0	1	0	0	0	0	0	0	0	0	1	0	0	0	0	0	0	0	0	0	0	0	0	0	0	0	0	0	0	0	0	0	0	0	0	0	0	0	0	0	0
d14301c6af973faac420fc9c2fe1de08_rep;size=85;	x__sub0.01	x__sub0.01	x__sub0.01	x__sub0.01	x__sub0.01	x__sub0.01	x__sub0.01	4	0	0	0	0	0	0	0	2	0	0	0	2	0	0	0	0	0	0	0	0	0	0	0	1	0	0	0	1	0	0	0	0	0	0	0	0	0	0	0	3	0
dbc0ca449fbc94c06acb66c6dcbf8e89_rep;size=84;	x__sub0.01	x__sub0.01	x__sub0.01	x__sub0.01	x__sub0.01	x__sub0.01	x__sub0.01	0	0	0	0	2	0	0	0	0	0	0	0	0	0	0	0	0	0	0	0	0	0	0	0	0	0	0	0	0	0	0	0	0	0	0	0	0	0	0	0	1	0
468f8243cd7f3105af684ce08a9c08ef_rep;size=84;	x__sub0.01	x__sub0.01	x__sub0.01	x__sub0.01	x__sub0.01	x__sub0.01	x__sub0.01	1	0	0	0	1	0	0	0	5	0	0	0	8	0	0	0	2	0	0	0	0	0	0	0	0	0	0	0	0	0	0	0	0	0	0	0	0	0	0	0	0	0
9890fc97cd9da6f18abf62246d7c1b1c_rep;size=84;	x__sub0.01	x__sub0.01	x__sub0.01	x__sub0.01	x__sub0.01	x__sub0.01	x__sub0.01	2	0	0	0	10	0	0	0	3	0	0	0	2	0	0	0	15	0	0	0	3	0	0	0	0	0	0	0	10	0	0	0	2	0	0	0	8	0	0	0	1	0
9bdf159c34d842659bdaf68cdce98941_rep;size=84;	x__sub0.01	x__sub0.01	x__sub0.01	x__sub0.01	x__sub0.01	x__sub0.01	x__sub0.01	4	0	0	0	2	0	0	0	1	0	0	0	1	0	0	0	1	0	0	0	0	0	0	0	0	0	0	0	2	0	0	0	2	0	0	0	0	0	0	0	0	0
a76af8ce137a81565f7e0be458e08ddd_rep;size=84;	x__sub0.01	x__sub0.01	x__sub0.01	x__sub0.01	x__sub0.01	x__sub0.01	x__sub0.01	0	0	0	0	0	0	0	0	0	0	0	0	2	0	0	0	0	0	0	0	0	0	0	0	0	0	0	0	1	0	0	0	1	0	0	0	1	0	0	0	0	0
21118416dba77e46db9923e555858904_rep;size=84;	x__sub0.01	x__sub0.01	x__sub0.01	x__sub0.01	x__sub0.01	x__sub0.01	x__sub0.01	1	0	0	0	2	0	0	0	4	0	0	0	0	0	0	0	1	0	0	0	2	0	0	0	2	0	0	0	0	0	0	0	0	0	0	0	0	0	0	0	0	0
d8de5b40daaf0e6588b7414005ad20e7_rep;size=84;	x__sub0.01	x__sub0.01	x__sub0.01	x__sub0.01	x__sub0.01	x__sub0.01	x__sub0.01	0	0	1	1	0	0	0	0	0	0	2	3	0	0	0	0	0	0	0	2	0	0	2	2	0	0	1	1	0	0	0	0	0	0	1	0	0	0	0	1	0	0
79e1bfa011c4afa3a167d7666f13b5d3_rep;size=84;	x__sub0.01	x__sub0.01	x__sub0.01	x__sub0.01	x__sub0.01	x__sub0.01	x__sub0.01	0	0	0	0	0	0	0	0	0	0	0	0	0	0	0	0	0	0	0	0	0	0	0	0	0	0	0	0	0	0	0	0	0	0	0	0	0	0	0	0	0	0
278101f66deb6a0418058a75b7bea35a_rep;size=83;	x__sub0.01	x__sub0.01	x__sub0.01	x__sub0.01	x__sub0.01	x__sub0.01	x__sub0.01	1	0	0	0	0	0	0	0	0	0	0	0	2	0	0	0	0	0	0	0	2	0	0	0	2	0	0	0	0	0	0	0	0	0	0	0	5	0	0	0	0	0
95009e99dc1780fd10fe4403c8b48a30_rep;size=83;	x__sub0.01	x__sub0.01	x__sub0.01	x__sub0.01	x__sub0.01	x__sub0.01	x__sub0.01	0	0	0	0	0	0	0	0	0	0	0	0	0	0	0	0	0	0	0	0	0	0	0	0	0	0	0	0	0	0	0	0	0	0	0	0	0	0	0	1	0	0
b99ce7fd39c0a1c91b033f08bde288d5_rep;size=83;	x__sub0.01	x__sub0.01	x__sub0.01	x__sub0.01	x__sub0.01	x__sub0.01	x__sub0.01	0	0	0	0	0	0	0	0	0	0	0	0	0	0	0	0	0	0	0	0	0	0	0	0	0	0	0	0	0	0	0	0	0	0	0	1	0	0	0	0	0	0
c5705b4808f78b35e7bf51e5c56e480c_rep;size=83;	x__sub0.01	x__sub0.01	x__sub0.01	x__sub0.01	x__sub0.01	x__sub0.01	x__sub0.01	0	0	0	1	0	1	1	1	0	0	0	0	0	1	3	1	0	0	0	2	0	1	0	1	0	0	1	12	0	0	0	3	0	0	0	3	0	0	0	9	0	0
5f2c428f41b2476c075c203e659eb1a5_rep;size=82;	x__sub0.01	x__sub0.01	x__sub0.01	x__sub0.01	x__sub0.01	x__sub0.01	x__sub0.01	1	0	0	0	1	0	0	0	0	0	0	0	4	0	0	0	1	0	0	0	4	0	0	0	2	0	0	0	3	0	0	0	5	0	0	0	3	0	0	0	1	0
9b0abc1e4deb945fe4275f95b68e07fe_rep;size=82;	x__sub0.01	x__sub0.01	x__sub0.01	x__sub0.01	x__sub0.01	x__sub0.01	x__sub0.01	0	1	0	0	0	0	0	0	11	0	0	0	0	0	0	0	18	0	0	0	0	0	0	0	3	0	0	0	0	0	0	0	2	0	0	0	0	0	0	0	4	0
2ed83dfcb1e5d163c420e1b1012ad70e_rep;size=82;	x__sub0.01	x__sub0.01	x__sub0.01	x__sub0.01	x__sub0.01	x__sub0.01	x__sub0.01	35	0	0	0	6	0	0	0	1	0	0	0	1	0	0	0	2	0	0	0	0	0	0	0	0	0	0	0	1	0	0	0	0	0	0	0	1	0	0	0	1	0
af5d4d9fda92c6a6995f7e886b133e45_rep;size=82;	x__sub0.01	x__sub0.01	x__sub0.01	x__sub0.01	x__sub0.01	x__sub0.01	x__sub0.01	0	0	0	0	0	0	0	0	0	0	0	0	0	0	0	0	0	0	0	0	0	0	0	0	0	0	0	0	0	0	0	0	0	0	0	0	0	0	0	0	0	0
b6a85e9f942d5224484ac72b77c4e20b_rep;size=82;	x__sub0.01	x__sub0.01	x__sub0.01	x__sub0.01	x__sub0.01	x__sub0.01	x__sub0.01	0	0	0	0	0	0	0	1	0	0	0	1	0	0	0	0	0	0	0	0	0	0	0	0	0	0	0	0	0	0	0	0	0	0	0	0	0	0	0	0	0	0
60b580b1930bd37a05402befa9871c7c_rep;size=81;	x__sub0.01	x__sub0.01	x__sub0.01	x__sub0.01	x__sub0.01	x__sub0.01	x__sub0.01	0	0	0	0	0	0	0	0	4	0	0	0	2	0	0	0	0	0	0	0	0	0	0	0	0	0	0	0	0	0	0	0	0	0	0	0	0	0	0	0	0	0
c2cfbf383e8b67ee4bdc62bcafddfea6_rep;size=81;	x__sub0.01	x__sub0.01	x__sub0.01	x__sub0.01	x__sub0.01	x__sub0.01	x__sub0.01	0	0	1	0	1	0	0	0	0	0	0	0	1	0	0	0	1	0	0	0	1	0	0	0	0	0	0	0	1	0	0	0	0	0	0	0	0	0	0	0	0	0
32aa44a4b2d107029668969f7215bf2e_rep;size=81;	x__sub0.01	x__sub0.01	x__sub0.01	x__sub0.01	x__sub0.01	x__sub0.01	x__sub0.01	1	0	0	0	2	0	0	0	1	0	0	0	0	0	0	0	0	0	0	0	2	0	0	0	0	0	0	0	1	0	0	0	2	0	0	0	1	0	0	0	3	0
3d5c737421a07ddad07a72028ed86fb7_rep;size=81;	x__sub0.01	x__sub0.01	x__sub0.01	x__sub0.01	x__sub0.01	x__sub0.01	x__sub0.01	1	0	0	0	3	0	0	0	0	0	0	0	1	0	0	1	8	0	0	0	3	0	0	0	4	0	0	0	0	0	0	0	2	0	0	0	0	0	0	0	0	0
8d66ff5be4939c48d22e75d2befc05a1_rep;size=81;	x__sub0.01	x__sub0.01	x__sub0.01	x__sub0.01	x__sub0.01	x__sub0.01	x__sub0.01	0	2	0	0	0	0	0	0	0	0	0	0	0	0	0	0	0	0	0	0	0	0	0	0	0	0	0	0	0	0	0	0	0	0	0	0	0	0	0	0	0	0
80a60eb4948dfcea2afdc6fdc801a635_rep;size=81;	x__sub0.01	x__sub0.01	x__sub0.01	x__sub0.01	x__sub0.01	x__sub0.01	x__sub0.01	0	0	0	0	0	0	0	0	5	0	0	0	0	0	0	0	0	0	0	0	1	0	0	0	0	0	0	0	0	0	0	0	0	0	0	0	2	0	0	0	0	0
fa3e4926f9c703441d103e9c6b6b53af_rep;size=80;	x__sub0.01	x__sub0.01	x__sub0.01	x__sub0.01	x__sub0.01	x__sub0.01	x__sub0.01	4	1	0	1	1	1	0	0	0	0	0	0	0	0	0	1	1	0	0	0	2	0	0	0	0	0	0	0	1	0	0	0	0	0	0	0	5	0	0	0	9	0
989b90436b11652a19674623a75c56b4_rep;size=80;	x__sub0.01	x__sub0.01	x__sub0.01	x__sub0.01	x__sub0.01	x__sub0.01	x__sub0.01	0	0	0	0	0	0	0	0	0	0	0	0	3	0	0	0	28	0	0	0	0	0	0	0	2	0	0	0	0	0	0	0	1	0	0	0	31	0	0	0	0	0
b25d161a5d99b466a9576f7e8ece8aee_rep;size=80;	x__sub0.01	x__sub0.01	x__sub0.01	x__sub0.01	x__sub0.01	x__sub0.01	x__sub0.01	0	0	0	0	0	0	0	0	0	0	0	0	0	0	0	0	0	0	0	0	0	0	0	0	0	0	0	0	0	0	0	0	0	0	0	0	0	0	0	0	0	0
365c657f44ce31400571d341f36679ca_rep;size=80;	x__sub0.01	x__sub0.01	x__sub0.01	x__sub0.01	x__sub0.01	x__sub0.01	x__sub0.01	0	0	0	0	0	0	0	0	0	0	0	0	0	0	0	0	0	0	0	0	0	0	0	0	0	0	0	0	0	0	0	0	0	0	0	0	0	0	0	0	0	0
8d453937622907460e6837b15944fa7a_rep;size=79;	x__sub0.01	x__sub0.01	x__sub0.01	x__sub0.01	x__sub0.01	x__sub0.01	x__sub0.01	0	0	0	0	0	0	0	0	0	0	0	0	0	0	0	0	0	0	0	0	0	0	0	0	0	0	0	0	0	0	0	0	1	0	0	0	0	0	0	0	0	0
4ae9828cad867c2d6f2738b8be68cfb2_rep;size=79;	x__sub0.01	x__sub0.01	x__sub0.01	x__sub0.01	x__sub0.01	x__sub0.01	x__sub0.01	0	0	0	0	0	0	0	0	0	0	0	0	0	0	0	0	0	0	0	0	0	0	0	0	0	0	0	0	0	0	0	0	0	0	0	0	0	0	0	0	1	0
69b5c4694f573c156a7304214f47a2cd_rep;size=79;	x__sub0.01	x__sub0.01	x__sub0.01	x__sub0.01	x__sub0.01	x__sub0.01	x__sub0.01	0	0	0	0	2	0	1	0	4	0	0	0	0	0	1	0	1	1	0	0	1	0	2	0	0	0	0	0	0	1	0	0	1	0	0	0	2	0	0	1	2	0
bd4eda5460647ce971b20671523e5f75_rep;size=79;	x__sub0.01	x__sub0.01	x__sub0.01	x__sub0.01	x__sub0.01	x__sub0.01	x__sub0.01	0	0	0	0	0	0	0	0	0	0	0	0	0	0	0	0	1	0	0	0	0	0	0	0	0	0	0	0	0	0	0	0	0	0	0	0	0	0	0	0	0	0
57235f74611fe44b740c1b96c97800cc_rep;size=79;	x__sub0.01	x__sub0.01	x__sub0.01	x__sub0.01	x__sub0.01	x__sub0.01	x__sub0.01	0	0	3	0	0	1	0	0	0	1	0	1	0	3	2	1	0	3	1	3	0	3	0	0	0	0	2	5	0	0	1	3	0	2	1	3	0	2	0	2	0	0
833739a07952e1bbdc0be3638292415d_rep;size=79;	x__sub0.01	x__sub0.01	x__sub0.01	x__sub0.01	x__sub0.01	x__sub0.01	x__sub0.01	0	0	0	0	0	0	0	0	0	0	0	0	0	0	0	0	0	0	0	0	0	0	0	0	0	0	0	0	0	0	0	0	0	0	0	0	0	0	0	0	0	0
1d371936dd49095b89c7b004a85aed8e_rep;size=79;	x__sub0.01	x__sub0.01	x__sub0.01	x__sub0.01	x__sub0.01	x__sub0.01	x__sub0.01	0	0	0	0	0	0	3	0	0	0	0	0	0	0	0	0	0	0	0	0	0	0	0	0	0	0	0	0	0	0	0	0	0	0	0	0	0	0	0	0	0	0
df2d33592245b97b5225bb3a143d9d3f_rep;size=79;	x__sub0.01	x__sub0.01	x__sub0.01	x__sub0.01	x__sub0.01	x__sub0.01	x__sub0.01	0	1	0	0	0	0	0	0	0	0	0	1	0	0	0	0	0	0	0	0	0	0	0	0	0	0	0	0	0	1	0	0	0	0	0	1	0	0	0	0	0	0
075430b19e4cfa78c39469c77b887b57_rep;size=78;	x__sub0.01	x__sub0.01	x__sub0.01	x__sub0.01	x__sub0.01	x__sub0.01	x__sub0.01	2	0	0	0	2	0	0	0	2	0	0	0	1	0	0	0	2	0	0	0	0	0	0	0	0	0	0	0	0	0	0	0	1	0	0	0	0	0	0	0	1	0
32eec5ea4a231710f9f901f81767f525_rep;size=78;	x__sub0.01	x__sub0.01	x__sub0.01	x__sub0.01	x__sub0.01	x__sub0.01	x__sub0.01	0	0	0	0	0	0	0	0	0	0	0	0	0	0	0	0	0	0	0	0	0	0	0	0	0	0	0	0	0	0	0	0	0	0	0	0	0	0	0	0	0	0
c25b08843bad112fc507ac265c3f67d7_rep;size=78;	x__sub0.01	x__sub0.01	x__sub0.01	x__sub0.01	x__sub0.01	x__sub0.01	x__sub0.01	0	0	0	0	0	0	0	0	0	0	0	1	0	0	0	0	0	0	0	0	0	0	0	0	0	0	0	0	0	0	0	0	0	0	0	0	0	0	0	0	0	0
513411a56146955e183ca1bf467e9259_rep;size=78;	x__sub0.01	x__sub0.01	x__sub0.01	x__sub0.01	x__sub0.01	x__sub0.01	x__sub0.01	0	0	0	0	3	0	0	0	3	0	0	0	1	0	0	0	3	0	0	0	2	0	0	0	0	0	0	0	2	0	0	0	3	0	0	0	3	0	0	0	2	0
7a85a2df8a89217be2055737bb263893_rep;size=78;	x__sub0.01	x__sub0.01	x__sub0.01	x__sub0.01	x__sub0.01	x__sub0.01	x__sub0.01	0	0	0	0	2	0	0	0	4	0	0	0	0	0	0	0	2	0	0	0	6	0	0	0	1	0	0	0	5	0	0	0	2	0	0	0	9	0	0	0	0	0
689ca773057ab7032663619e68649945_rep;size=78;	x__sub0.01	x__sub0.01	x__sub0.01	x__sub0.01	x__sub0.01	x__sub0.01	x__sub0.01	0	0	0	0	0	0	0	0	0	0	0	0	0	0	0	0	0	0	1	0	0	0	0	0	0	0	0	0	0	0	0	1	0	0	0	0	0	0	0	0	0	0
e0ec4741400831830724effef7e21778_rep;size=78;	x__sub0.01	x__sub0.01	x__sub0.01	x__sub0.01	x__sub0.01	x__sub0.01	x__sub0.01	1	0	0	0	0	0	0	0	1	0	0	0	3	0	0	0	0	0	0	0	0	0	0	0	0	0	0	0	0	0	0	0	0	0	0	0	0	0	0	0	3	0
b5017fa9f6328bbf5093f09df7ad5790_rep;size=77;	x__sub0.01	x__sub0.01	x__sub0.01	x__sub0.01	x__sub0.01	x__sub0.01	x__sub0.01	1	0	0	0	1	0	0	0	0	0	0	0	0	0	0	0	0	0	0	0	0	0	0	0	0	0	0	0	0	0	0	0	1	0	0	0	2	0	0	0	0	0
8410cf6f048f7006a3ea6cdd037d03b8_rep;size=77;	x__sub0.01	x__sub0.01	x__sub0.01	x__sub0.01	x__sub0.01	x__sub0.01	x__sub0.01	0	0	0	0	0	0	0	0	0	0	0	0	0	0	0	0	0	0	0	0	0	0	0	0	0	0	0	0	0	0	0	0	0	0	0	0	0	0	0	0	0	0
ccba0f50511c8126457118dbf633d169_rep;size=77;	x__sub0.01	x__sub0.01	x__sub0.01	x__sub0.01	x__sub0.01	x__sub0.01	x__sub0.01	0	0	0	0	0	0	0	0	5	0	0	0	4	0	0	0	2	0	0	0	0	0	0	0	1	0	0	0	0	0	0	0	0	0	0	0	0	0	0	0	0	0
9cb26b9ce8a41c5aa11a9f37d39c718a_rep;size=77;	x__sub0.01	x__sub0.01	x__sub0.01	x__sub0.01	x__sub0.01	x__sub0.01	x__sub0.01	0	1	0	0	0	0	0	0	0	0	0	0	0	0	0	1	0	0	1	2	0	0	1	1	0	0	0	5	0	0	0	3	0	0	0	2	0	0	0	1	0	0
4a4623bd4fa92eeb397ae163d67b1db6_rep;size=76;	x__sub0.01	x__sub0.01	x__sub0.01	x__sub0.01	x__sub0.01	x__sub0.01	x__sub0.01	1	0	0	0	2	0	0	0	3	0	0	0	0	0	0	0	0	0	0	0	1	0	0	0	1	0	0	0	3	0	0	0	1	0	0	0	1	0	0	0	3	0
62dbc086b2a01f199a8483e992f96981_rep;size=76;	x__sub0.01	x__sub0.01	x__sub0.01	x__sub0.01	x__sub0.01	x__sub0.01	x__sub0.01	0	0	0	0	0	0	0	0	0	0	0	0	0	0	0	1	0	0	0	0	0	0	0	0	0	0	0	0	0	0	0	0	0	0	0	0	0	0	0	0	0	0
0e749d453bda85a836d6d98115fe5b99_rep;size=76;	x__sub0.01	x__sub0.01	x__sub0.01	x__sub0.01	x__sub0.01	x__sub0.01	x__sub0.01	0	0	0	0	5	0	0	0	2	0	0	0	0	0	0	0	1	0	0	0	4	0	0	0	0	0	0	0	4	0	0	0	0	0	0	0	5	0	0	0	0	0
25be97f383d979276ce9977df0b78b37_rep;size=76;	x__sub0.01	x__sub0.01	x__sub0.01	x__sub0.01	x__sub0.01	x__sub0.01	x__sub0.01	0	0	0	0	0	0	0	0	0	0	0	0	0	0	0	0	0	0	0	0	0	0	0	0	0	0	0	0	0	0	0	0	0	0	0	0	0	0	0	0	0	0
a96f3909a6e8b4d73f3b09eb44892a1c_rep;size=76;	x__sub0.01	x__sub0.01	x__sub0.01	x__sub0.01	x__sub0.01	x__sub0.01	x__sub0.01	0	0	0	0	0	0	0	0	0	0	0	0	0	0	0	0	0	0	0	0	0	0	0	0	0	0	0	0	0	0	0	0	0	0	0	0	0	0	0	0	0	0
4902c41effc4b95c09940512630fc02d_rep;size=75;	x__sub0.01	x__sub0.01	x__sub0.01	x__sub0.01	x__sub0.01	x__sub0.01	x__sub0.01	5	0	0	0	0	0	0	0	0	0	0	0	0	0	0	0	0	0	0	0	0	0	0	0	0	0	0	2	0	0	0	0	4	0	0	0	0	0	0	0	0	0
94a31e513306353ce11aef1a56d4b78b_rep;size=75;	x__sub0.01	x__sub0.01	x__sub0.01	x__sub0.01	x__sub0.01	x__sub0.01	x__sub0.01	0	0	0	0	0	0	0	0	0	0	0	0	0	0	0	0	0	0	0	0	0	0	0	0	0	0	0	0	0	0	0	0	0	0	0	0	0	0	0	0	1	0
1e7a29afe2d71741b3f0136b162352b9_rep;size=75;	x__sub0.01	x__sub0.01	x__sub0.01	x__sub0.01	x__sub0.01	x__sub0.01	x__sub0.01	0	0	0	0	0	0	0	0	0	0	0	0	0	0	0	0	1	0	0	0	0	0	0	0	0	0	0	0	0	0	0	0	0	0	0	0	2	0	0	0	0	0
09a0767f5d35794c1ebd478a23a210df_rep;size=75;	x__sub0.01	x__sub0.01	x__sub0.01	x__sub0.01	x__sub0.01	x__sub0.01	x__sub0.01	1	0	0	0	1	0	0	0	0	0	0	0	1	0	0	0	2	0	0	2	0	0	0	0	0	0	0	0	0	0	0	0	0	0	0	0	0	0	0	0	0	0
d690d111d7937d0ac44e2ca7191ddf04_rep;size=75;	x__sub0.01	x__sub0.01	x__sub0.01	x__sub0.01	x__sub0.01	x__sub0.01	x__sub0.01	0	0	0	0	0	0	0	0	0	0	0	0	0	0	0	0	0	0	0	0	0	0	0	0	0	0	0	0	0	0	0	0	0	0	0	0	0	0	0	0	0	0
7b845eaf151c717f2df29e0a2f5e6b9b_rep;size=75;	x__sub0.01	x__sub0.01	x__sub0.01	x__sub0.01	x__sub0.01	x__sub0.01	x__sub0.01	0	0	0	0	0	0	0	0	0	0	0	1	0	0	0	0	0	0	0	0	0	0	0	0	0	0	0	0	0	0	0	1	0	0	0	0	0	0	0	0	0	0
8cbaf5a90224f3a326b10f55ea8cfa23_rep;size=74;	x__sub0.01	x__sub0.01	x__sub0.01	x__sub0.01	x__sub0.01	x__sub0.01	x__sub0.01	0	0	0	0	0	0	0	0	0	0	0	0	0	0	0	0	0	0	0	0	0	0	0	0	0	0	0	0	0	0	0	0	0	0	0	0	0	0	0	0	0	0
2db77a53b329df61c7f307effe8d2ee6_rep;size=74;	x__sub0.01	x__sub0.01	x__sub0.01	x__sub0.01	x__sub0.01	x__sub0.01	x__sub0.01	0	0	0	0	0	0	0	0	0	0	0	0	0	0	0	0	0	0	0	0	0	0	0	0	0	0	0	0	0	0	0	0	0	0	0	0	0	0	0	0	0	0
a77c8d26020549535e936dbb9c2149ce_rep;size=74;	x__sub0.01	x__sub0.01	x__sub0.01	x__sub0.01	x__sub0.01	x__sub0.01	x__sub0.01	0	0	0	0	0	0	0	0	0	0	0	0	2	0	0	0	0	0	0	0	0	0	0	0	0	0	0	0	1	0	0	0	0	0	0	0	2	0	0	0	1	0
4cef36dabc58521e78bd019fe0608b3f_rep;size=74;	x__sub0.01	x__sub0.01	x__sub0.01	x__sub0.01	x__sub0.01	x__sub0.01	x__sub0.01	0	0	0	0	0	0	0	0	0	0	0	0	0	0	0	0	0	0	0	0	0	0	1	0	0	0	0	0	0	0	0	0	0	0	0	1	0	0	0	0	0	0
3dbe9fc98b2fee73faeff61fd50d8dfb_rep;size=73;	x__sub0.01	x__sub0.01	x__sub0.01	x__sub0.01	x__sub0.01	x__sub0.01	x__sub0.01	0	0	0	0	0	0	0	0	0	0	0	0	0	0	0	0	0	0	0	0	0	0	0	0	0	0	0	0	0	0	0	0	0	0	0	0	0	0	0	0	0	0
5474c68c47589d565837cd4166535527_rep;size=73;	x__sub0.01	x__sub0.01	x__sub0.01	x__sub0.01	x__sub0.01	x__sub0.01	x__sub0.01	0	0	0	0	0	0	0	0	0	0	0	0	0	0	0	0	0	0	0	0	0	0	0	0	0	0	0	0	0	0	0	0	0	0	0	1	0	0	0	0	0	0
240793a79ab86b99c9b4f573ed0e174c_rep;size=72;	x__sub0.01	x__sub0.01	x__sub0.01	x__sub0.01	x__sub0.01	x__sub0.01	x__sub0.01	0	0	0	0	0	0	0	0	0	0	0	0	0	0	0	0	0	0	0	0	0	0	0	0	0	0	0	0	0	0	0	0	2	0	0	0	0	0	0	0	0	0
afaa1d4b29024c377af6832936fa2db2_rep;size=72;	x__sub0.01	x__sub0.01	x__sub0.01	x__sub0.01	x__sub0.01	x__sub0.01	x__sub0.01	0	0	0	0	0	0	0	0	0	0	0	0	0	0	0	0	0	0	0	0	0	0	0	0	0	0	0	0	0	0	0	0	0	0	0	0	0	0	0	0	0	0
839c165cf7a294af2bc74dd44b168282_rep;size=71;	x__sub0.01	x__sub0.01	x__sub0.01	x__sub0.01	x__sub0.01	x__sub0.01	x__sub0.01	0	0	0	0	0	0	0	0	0	0	0	0	3	0	0	0	0	0	0	0	0	0	0	0	0	0	0	0	0	0	0	0	0	0	0	0	0	0	0	0	0	0
68b43f41e59581be470d39963a721aa8_rep;size=71;	x__sub0.01	x__sub0.01	x__sub0.01	x__sub0.01	x__sub0.01	x__sub0.01	x__sub0.01	0	0	0	0	0	0	0	0	0	0	0	0	0	0	0	0	0	0	0	0	0	0	0	0	0	0	0	0	0	0	0	0	0	0	0	0	0	0	0	0	0	0
d7244c447978009aa038db68b84e2de8_rep;size=71;	x__sub0.01	x__sub0.01	x__sub0.01	x__sub0.01	x__sub0.01	x__sub0.01	x__sub0.01	0	0	0	0	0	0	0	0	0	0	0	0	0	0	0	0	0	0	0	0	0	0	0	0	0	0	0	0	1	0	0	0	0	0	0	0	0	0	0	0	0	0
783d2567f90fd169faaf56f0b9e60bca_rep;size=71;	x__sub0.01	x__sub0.01	x__sub0.01	x__sub0.01	x__sub0.01	x__sub0.01	x__sub0.01	8	0	0	0	0	0	0	0	4	0	0	0	3	0	0	0	3	0	0	0	3	0	0	0	0	0	0	0	4	0	0	0	1	0	0	0	0	0	0	0	3	0
3b5601f921d79e50e3fbe53b03b66e0d_rep;size=71;	x__sub0.01	x__sub0.01	x__sub0.01	x__sub0.01	x__sub0.01	x__sub0.01	x__sub0.01	0	0	0	1	0	1	1	0	0	0	0	1	0	0	0	0	0	0	0	0	0	0	0	0	0	0	0	0	0	0	0	0	1	0	0	0	2	0	0	0	0	0
7ae033876e32c96887c75b3ed1dc5835_rep;size=71;	x__sub0.01	x__sub0.01	x__sub0.01	x__sub0.01	x__sub0.01	x__sub0.01	x__sub0.01	0	0	0	0	0	0	0	1	0	0	0	0	0	0	0	0	0	0	0	0	0	0	0	0	0	0	0	0	0	0	0	0	0	0	0	0	0	0	0	0	0	0
1e824bc37cf64e4fe54cdf8b5cc441b8_rep;size=71;	x__sub0.01	x__sub0.01	x__sub0.01	x__sub0.01	x__sub0.01	x__sub0.01	x__sub0.01	0	1	0	0	0	0	0	0	0	0	0	0	0	0	0	0	0	0	0	0	0	0	0	0	0	0	0	0	0	0	0	0	0	0	0	0	0	0	0	0	0	0
04f5422cd883e16e59244ec4353a9c94_rep;size=70;	x__sub0.01	x__sub0.01	x__sub0.01	x__sub0.01	x__sub0.01	x__sub0.01	x__sub0.01	2	0	0	0	4	0	0	0	4	0	0	0	0	0	0	0	0	0	0	0	1	0	0	0	0	0	0	0	0	0	0	0	0	0	0	0	1	0	0	0	0	0
77503c7bd7271d25e08986a79cabfa8f_rep;size=70;	x__sub0.01	x__sub0.01	x__sub0.01	x__sub0.01	x__sub0.01	x__sub0.01	x__sub0.01	1	0	0	0	0	0	0	0	0	0	0	0	0	0	0	0	0	0	0	0	0	0	0	0	0	0	0	0	1	0	0	0	0	0	0	0	0	0	0	0	0	0
213f4571b1eaa8caad6888d987dc1603_rep;size=70;	x__sub0.01	x__sub0.01	x__sub0.01	x__sub0.01	x__sub0.01	x__sub0.01	x__sub0.01	2	0	1	0	0	0	0	0	2	0	0	0	0	0	0	0	0	0	0	0	0	0	0	0	1	0	0	0	3	0	0	0	0	0	0	0	2	0	0	0	1	0
eee057dd8799a81e8879329c837583d4_rep;size=70;	x__sub0.01	x__sub0.01	x__sub0.01	x__sub0.01	x__sub0.01	x__sub0.01	x__sub0.01	1	0	0	0	3	0	0	0	0	0	0	0	8	0	0	0	1	0	0	0	0	0	0	0	4	0	0	0	16	0	0	0	0	0	0	0	0	0	0	0	1	0
29a6b620f1ea70c763aa6316b34a62ac_rep;size=70;	x__sub0.01	x__sub0.01	x__sub0.01	x__sub0.01	x__sub0.01	x__sub0.01	x__sub0.01	0	0	0	0	0	0	0	0	0	0	1	0	0	0	0	0	0	0	0	0	0	0	0	0	0	0	1	0	0	1	0	2	0	0	0	2	0	0	0	0	0	0
9dd26b4d8679826e45f6ec5b07940f90_rep;size=70;	x__sub0.01	x__sub0.01	x__sub0.01	x__sub0.01	x__sub0.01	x__sub0.01	x__sub0.01	0	0	0	0	0	0	0	0	0	0	0	0	0	0	0	0	0	0	0	0	0	0	0	0	0	0	0	0	0	0	0	0	0	0	0	0	0	0	0	0	0	0
73dae222990491f90a90f51655de716e_rep;size=70;	x__sub0.01	x__sub0.01	x__sub0.01	x__sub0.01	x__sub0.01	x__sub0.01	x__sub0.01	0	0	0	0	0	0	0	0	0	0	0	0	0	0	0	0	0	0	0	0	0	0	0	0	0	0	0	0	0	0	0	0	0	0	0	0	0	0	0	0	0	0
72a6c73867b576ba6a5b73e577738712_rep;size=70;	x__sub0.01	x__sub0.01	x__sub0.01	x__sub0.01	x__sub0.01	x__sub0.01	x__sub0.01	0	0	0	0	18	0	0	0	8	0	0	0	1	0	0	0	0	0	0	0	0	0	0	0	0	0	0	0	0	0	0	0	0	0	0	0	0	0	0	0	0	0
d42e0cbaa26f809816a2aa5ccf59696a_rep;size=70;	x__sub0.01	x__sub0.01	x__sub0.01	x__sub0.01	x__sub0.01	x__sub0.01	x__sub0.01	0	0	0	1	0	0	0	0	0	0	0	0	0	2	0	0	0	0	0	0	0	0	0	0	0	0	0	1	0	0	0	0	0	0	0	0	0	0	0	0	1	0
22b379cec70198880978294bb3d07631_rep;size=70;	x__sub0.01	x__sub0.01	x__sub0.01	x__sub0.01	x__sub0.01	x__sub0.01	x__sub0.01	0	0	0	0	0	0	0	0	0	0	0	0	0	0	0	0	0	0	0	0	0	0	1	0	0	0	0	0	0	0	0	0	0	0	0	0	0	0	0	0	0	0
5c88c56d834bbbe7c1efe69154d0cb72_rep;size=69;	x__sub0.01	x__sub0.01	x__sub0.01	x__sub0.01	x__sub0.01	x__sub0.01	x__sub0.01	0	0	0	0	0	0	0	0	0	0	0	0	0	0	0	0	0	0	0	0	0	0	0	0	0	0	0	0	0	0	0	0	0	0	0	0	0	0	0	0	0	0
9b93f2c697a2100af20db1504d848264_rep;size=69;	x__sub0.01	x__sub0.01	x__sub0.01	x__sub0.01	x__sub0.01	x__sub0.01	x__sub0.01	0	0	0	0	2	0	0	0	7	0	0	0	1	0	0	0	1	0	0	0	13	0	0	0	0	0	0	0	1	0	0	0	0	0	0	0	0	0	0	0	0	0
1de755bce37d6f53e5f990a646da2ed8_rep;size=69;	x__sub0.01	x__sub0.01	x__sub0.01	x__sub0.01	x__sub0.01	x__sub0.01	x__sub0.01	1	0	0	0	1	0	0	0	3	0	0	0	0	0	0	0	2	0	0	0	2	0	0	0	3	0	0	0	3	0	0	0	0	0	0	0	2	0	0	0	0	0
78f55051b75ba403651a80344067953f_rep;size=69;	x__sub0.01	x__sub0.01	x__sub0.01	x__sub0.01	x__sub0.01	x__sub0.01	x__sub0.01	0	0	0	0	0	0	0	0	0	0	0	0	0	0	0	0	0	0	0	0	0	0	0	0	0	0	0	0	0	0	0	0	0	0	0	0	0	0	0	0	0	0
47755542194e48e45c9a7f6c7336caeb_rep;size=68;	x__sub0.01	x__sub0.01	x__sub0.01	x__sub0.01	x__sub0.01	x__sub0.01	x__sub0.01	0	0	0	0	0	0	2	0	0	0	0	0	0	1	0	0	0	0	0	0	0	0	0	0	0	0	0	0	0	0	1	0	0	0	1	0	0	0	0	0	0	1
dd9baf896f40490627e23bad89f65f39_rep;size=68;	x__sub0.01	x__sub0.01	x__sub0.01	x__sub0.01	x__sub0.01	x__sub0.01	x__sub0.01	3	0	0	0	1	0	0	0	1	0	0	0	3	0	0	0	2	0	0	0	2	0	0	0	0	0	0	0	0	0	0	0	1	0	0	0	0	0	0	0	1	0
736b3a70a5b45f0c3c09d8704643cb65_rep;size=68;	x__sub0.01	x__sub0.01	x__sub0.01	x__sub0.01	x__sub0.01	x__sub0.01	x__sub0.01	0	0	1	0	0	0	0	0	0	0	1	0	0	0	0	0	0	0	1	0	0	0	2	0	0	0	0	0	0	0	1	0	0	0	1	0	0	0	0	1	0	0
cde25d81588db571a69dc76ac77ce124_rep;size=68;	x__sub0.01	x__sub0.01	x__sub0.01	x__sub0.01	x__sub0.01	x__sub0.01	x__sub0.01	0	0	0	0	0	0	0	0	0	0	0	0	0	0	2	0	0	0	0	1	0	0	0	0	0	0	0	0	0	0	0	0	0	0	0	0	0	0	0	0	0	0
15273bbf870d6b72fc3cdf116cc616ba_rep;size=68;	x__sub0.01	x__sub0.01	x__sub0.01	x__sub0.01	x__sub0.01	x__sub0.01	x__sub0.01	0	0	0	0	0	0	0	0	0	0	0	0	0	0	0	0	0	0	0	0	0	0	0	0	0	0	0	0	0	0	0	0	0	0	0	0	0	0	0	0	0	0
836da7de76ddcd62a67ed098bc96c20e_rep;size=68;	x__sub0.01	x__sub0.01	x__sub0.01	x__sub0.01	x__sub0.01	x__sub0.01	x__sub0.01	0	0	0	0	0	0	0	0	0	0	0	0	0	0	0	0	0	0	0	0	0	0	0	0	0	0	0	0	0	0	0	1	0	0	0	0	0	0	0	0	0	0
2afec4bb79a435cc25558389ec00cf2f_rep;size=67;	x__sub0.01	x__sub0.01	x__sub0.01	x__sub0.01	x__sub0.01	x__sub0.01	x__sub0.01	0	0	0	0	0	0	0	0	0	0	0	0	0	0	0	0	0	0	0	0	0	0	0	0	0	0	0	0	0	0	0	0	0	0	0	0	0	0	0	0	0	0
38d8f7e3222b1494a88170681478be99_rep;size=67;	x__sub0.01	x__sub0.01	x__sub0.01	x__sub0.01	x__sub0.01	x__sub0.01	x__sub0.01	3	0	0	0	0	0	0	0	3	0	0	0	3	0	0	0	1	0	0	0	4	0	0	0	1	0	0	0	1	0	0	0	1	0	0	0	1	0	0	0	0	0
2c33099b730b8054fd0e99486261fb35_rep;size=67;	x__sub0.01	x__sub0.01	x__sub0.01	x__sub0.01	x__sub0.01	x__sub0.01	x__sub0.01	0	0	0	0	0	0	0	0	0	0	0	0	0	0	0	0	0	0	0	0	0	0	0	1	0	0	0	1	0	0	1	0	0	0	1	0	0	0	0	0	0	0
ab92aeb8d07cc6de737534fc2d8bc03a_rep;size=66;	x__sub0.01	x__sub0.01	x__sub0.01	x__sub0.01	x__sub0.01	x__sub0.01	x__sub0.01	0	0	0	0	0	0	0	0	0	0	0	0	0	0	0	0	0	0	0	0	0	0	0	0	0	0	0	0	0	0	0	0	0	0	0	0	0	0	0	0	0	0
5e0ef9ea74c5c9bf90b3d7ea3866263f_rep;size=66;	x__sub0.01	x__sub0.01	x__sub0.01	x__sub0.01	x__sub0.01	x__sub0.01	x__sub0.01	0	0	0	0	0	0	0	0	0	0	0	0	0	0	0	0	0	0	0	0	0	0	0	0	0	0	0	0	0	0	0	0	0	0	0	0	0	0	0	0	0	0
7ba2574583b005b2a063c42cd6d0e3b7_rep;size=66;	x__sub0.01	x__sub0.01	x__sub0.01	x__sub0.01	x__sub0.01	x__sub0.01	x__sub0.01	0	0	1	2	0	0	1	0	0	1	1	2	0	1	1	0	1	0	0	2	0	1	1	1	0	0	2	1	1	0	0	0	0	0	3	3	0	0	0	3	1	0
173902681d265cfda2655ff814ec83e9_rep;size=66;	x__sub0.01	x__sub0.01	x__sub0.01	x__sub0.01	x__sub0.01	x__sub0.01	x__sub0.01	0	0	0	0	0	0	0	0	0	0	0	0	0	0	0	0	0	0	0	0	0	0	0	0	0	0	0	0	0	0	0	0	0	0	0	0	0	0	0	0	0	0
381081d76c6742f953ddc974ee4a3852_rep;size=66;	x__sub0.01	x__sub0.01	x__sub0.01	x__sub0.01	x__sub0.01	x__sub0.01	x__sub0.01	1	0	0	0	0	0	0	0	0	0	0	0	0	0	0	0	0	0	0	0	1	0	0	0	0	0	0	0	2	0	0	0	2	0	0	0	0	0	0	0	0	0
bc2a38b23329c46e1c42756ea3e2f9c6_rep;size=66;	x__sub0.01	x__sub0.01	x__sub0.01	x__sub0.01	x__sub0.01	x__sub0.01	x__sub0.01	0	0	0	0	0	0	0	0	0	0	0	0	0	0	0	0	0	0	0	0	0	0	0	0	0	0	0	0	0	0	0	1	0	0	0	0	0	0	0	0	0	0
0a21bd81f9b24b6ce2c1c059457176c6_rep;size=65;	x__sub0.01	x__sub0.01	x__sub0.01	x__sub0.01	x__sub0.01	x__sub0.01	x__sub0.01	0	0	0	0	0	0	0	0	0	0	0	0	0	0	0	0	0	0	0	0	0	0	0	0	0	0	0	0	0	0	0	0	0	0	0	0	0	0	0	0	0	0
d053c23e7727b9a055e50e87b1467a67_rep;size=65;	x__sub0.01	x__sub0.01	x__sub0.01	x__sub0.01	x__sub0.01	x__sub0.01	x__sub0.01	0	0	1	0	0	0	0	0	0	0	1	0	0	1	0	0	0	0	0	0	0	0	0	0	0	0	0	0	0	0	0	0	0	0	0	0	0	0	0	0	0	0
b9eb9cd1341c95e4690196ed2964bae4_rep;size=65;	x__sub0.01	x__sub0.01	x__sub0.01	x__sub0.01	x__sub0.01	x__sub0.01	x__sub0.01	0	0	0	0	0	0	0	0	0	0	0	0	0	0	0	0	0	0	0	0	0	0	0	0	0	0	0	0	0	0	0	0	0	0	0	0	0	0	0	0	0	0
8a0caaacba74ac5eaf42c6fd6cb4f4a6_rep;size=65;	x__sub0.01	x__sub0.01	x__sub0.01	x__sub0.01	x__sub0.01	x__sub0.01	x__sub0.01	0	0	0	0	0	0	0	0	0	0	0	0	0	0	0	0	0	0	0	0	0	0	0	0	0	0	0	0	0	0	0	0	0	0	0	0	0	0	0	0	0	0
23641a6896b8c9a21e440aed0046ecce_rep;size=65;	x__sub0.01	x__sub0.01	x__sub0.01	x__sub0.01	x__sub0.01	x__sub0.01	x__sub0.01	0	0	0	0	0	0	0	0	0	0	0	0	0	0	0	0	0	0	0	0	0	0	0	0	0	0	0	0	0	0	0	0	0	0	0	0	0	0	0	0	0	0
1d1345d39e69f3b94b9c5b4de7d98c00_rep;size=64;	x__sub0.01	x__sub0.01	x__sub0.01	x__sub0.01	x__sub0.01	x__sub0.01	x__sub0.01	1	0	0	0	0	0	0	0	1	0	0	0	2	0	0	0	1	0	0	0	0	0	0	0	3	0	0	0	0	0	0	0	0	0	0	0	0	0	0	0	1	0
817618cbd4eae73784090d30d9788f82_rep;size=64;	x__sub0.01	x__sub0.01	x__sub0.01	x__sub0.01	x__sub0.01	x__sub0.01	x__sub0.01	0	0	0	0	0	0	0	0	0	0	0	0	0	0	0	0	0	0	0	0	0	0	0	0	0	0	0	0	0	0	0	0	0	0	0	0	0	0	0	0	0	0
477c88191156688a850f045a7e72b6d9_rep;size=64;	x__sub0.01	x__sub0.01	x__sub0.01	x__sub0.01	x__sub0.01	x__sub0.01	x__sub0.01	0	0	0	0	0	0	0	0	0	0	0	0	1	0	0	0	2	0	0	0	0	0	0	0	0	0	0	0	0	0	0	0	0	0	0	0	0	0	0	0	0	0
658347f5fa80ba88e4690ce654c492bc_rep;size=64;	x__sub0.01	x__sub0.01	x__sub0.01	x__sub0.01	x__sub0.01	x__sub0.01	x__sub0.01	1	0	0	0	0	0	0	0	0	0	0	0	2	0	0	0	0	0	0	0	3	0	0	0	0	0	0	0	0	0	0	0	0	0	0	0	1	0	0	0	0	0
f041eae526662216076581cd20694bb2_rep;size=64;	x__sub0.01	x__sub0.01	x__sub0.01	x__sub0.01	x__sub0.01	x__sub0.01	x__sub0.01	0	0	0	0	0	0	0	0	0	0	0	0	0	0	0	0	0	0	0	0	0	0	0	0	0	0	0	0	0	0	0	0	0	0	0	0	0	0	0	0	0	0
6bdfd6d5af274aab27e0a8340c9db7c0_rep;size=64;	x__sub0.01	x__sub0.01	x__sub0.01	x__sub0.01	x__sub0.01	x__sub0.01	x__sub0.01	0	0	0	0	1	0	0	0	0	0	0	0	0	0	0	0	1	0	0	0	0	0	0	0	1	0	0	0	0	0	0	0	0	0	0	0	0	0	0	0	0	0
f3b4c91121b8829653be3834f981e032_rep;size=64;	x__sub0.01	x__sub0.01	x__sub0.01	x__sub0.01	x__sub0.01	x__sub0.01	x__sub0.01	0	0	0	0	0	0	0	0	0	0	0	0	0	0	0	0	0	0	0	0	0	0	0	0	1	0	0	0	0	0	0	0	0	0	0	0	1	0	0	0	18	0
9dadbb919b117908350a44e5a6663545_rep;size=64;	x__sub0.01	x__sub0.01	x__sub0.01	x__sub0.01	x__sub0.01	x__sub0.01	x__sub0.01	0	0	0	0	0	0	0	0	0	0	0	0	0	0	0	0	0	0	0	0	0	0	0	0	0	0	0	0	0	0	0	0	0	0	0	0	0	0	0	0	0	0
a41b84987337f32bda7114a50b183bda_rep;size=63;	x__sub0.01	x__sub0.01	x__sub0.01	x__sub0.01	x__sub0.01	x__sub0.01	x__sub0.01	1	0	0	0	0	0	0	0	2	0	0	0	0	0	0	0	1	0	0	0	0	0	0	0	0	0	0	0	0	0	0	0	0	0	0	0	0	0	0	0	0	0
ed572ce86fbc63448ae3a94b951c0dfc_rep;size=63;	x__sub0.01	x__sub0.01	x__sub0.01	x__sub0.01	x__sub0.01	x__sub0.01	x__sub0.01	0	0	0	0	0	0	0	0	0	0	0	0	0	0	0	0	0	0	0	0	0	0	0	0	0	0	0	0	0	0	0	0	0	0	0	0	3	0	0	0	0	0
ee9cf44fe453c2f02f22dc877d7a4cec_rep;size=63;	x__sub0.01	x__sub0.01	x__sub0.01	x__sub0.01	x__sub0.01	x__sub0.01	x__sub0.01	0	0	0	0	2	0	0	0	3	0	0	0	4	0	0	0	0	0	0	0	1	0	0	0	1	0	0	0	1	0	0	0	0	0	0	0	0	0	0	0	1	0
085fb68211a3de6f2ec8281b272589d0_rep;size=63;	x__sub0.01	x__sub0.01	x__sub0.01	x__sub0.01	x__sub0.01	x__sub0.01	x__sub0.01	1	0	0	0	1	0	0	0	3	0	0	0	1	0	0	0	0	0	0	0	0	0	0	0	0	0	0	0	0	0	0	0	0	0	0	0	2	0	0	0	7	0
819a3d08e7a1e1829dc536661ba340b4_rep;size=63;	x__sub0.01	x__sub0.01	x__sub0.01	x__sub0.01	x__sub0.01	x__sub0.01	x__sub0.01	0	0	0	0	0	0	0	1	0	0	0	0	0	0	0	0	0	0	0	0	0	0	0	0	0	0	0	0	0	0	0	0	0	0	0	0	0	0	0	0	0	0
1150eaff85afbe45e4934c8a997bfa8e_rep;size=63;	x__sub0.01	x__sub0.01	x__sub0.01	x__sub0.01	x__sub0.01	x__sub0.01	x__sub0.01	0	0	0	0	0	0	0	0	0	0	2	0	0	0	0	0	0	0	0	0	0	0	0	0	0	0	0	0	0	0	0	0	0	0	0	0	0	0	0	0	0	0
11c4654f3a5784fcb4f2ffea5ccf28ea_rep;size=63;	x__sub0.01	x__sub0.01	x__sub0.01	x__sub0.01	x__sub0.01	x__sub0.01	x__sub0.01	0	0	0	0	0	0	0	0	0	0	0	0	0	0	0	0	0	0	0	0	0	0	0	0	0	0	0	0	0	0	0	0	0	0	0	0	0	0	0	0	0	0
7024a6c94e0a911252bc3ace5eda06f1_rep;size=62;	x__sub0.01	x__sub0.01	x__sub0.01	x__sub0.01	x__sub0.01	x__sub0.01	x__sub0.01	0	0	0	0	0	0	0	0	1	0	0	0	0	0	0	0	0	0	0	0	0	0	0	0	0	0	0	0	0	0	0	0	0	0	0	0	2	0	0	0	0	0
a3ec235a0ca8a32787803e2ba7c63d72_rep;size=62;	x__sub0.01	x__sub0.01	x__sub0.01	x__sub0.01	x__sub0.01	x__sub0.01	x__sub0.01	0	0	0	0	2	0	0	0	4	0	0	0	0	0	0	0	0	0	0	0	0	0	0	0	0	0	0	0	2	0	0	0	0	0	0	0	0	0	0	0	1	0
d36981274ba753be722a0ec396324b3c_rep;size=62;	x__sub0.01	x__sub0.01	x__sub0.01	x__sub0.01	x__sub0.01	x__sub0.01	x__sub0.01	0	0	0	0	0	0	0	0	0	0	0	0	0	0	0	0	0	0	0	0	0	0	0	0	0	0	0	0	0	0	0	0	0	0	0	0	0	0	0	0	0	0
50bc837b9ec4ffbb97aaa6c8c7d6a6f6_rep;size=62;	x__sub0.01	x__sub0.01	x__sub0.01	x__sub0.01	x__sub0.01	x__sub0.01	x__sub0.01	0	0	0	0	0	0	0	0	0	0	0	0	0	0	0	0	0	0	0	0	0	0	0	0	0	0	0	0	0	0	0	0	0	0	0	0	0	0	0	0	0	0
b3832fca00b35cf02bbfc8a4dbff0f62_rep;size=62;	x__sub0.01	x__sub0.01	x__sub0.01	x__sub0.01	x__sub0.01	x__sub0.01	x__sub0.01	0	0	0	0	0	0	0	0	0	0	0	0	0	0	0	0	0	0	0	0	0	0	0	0	0	0	0	0	0	0	0	0	0	0	0	0	0	0	0	0	0	0
7175366d58ed87cc8473a391be93ff07_rep;size=62;	x__sub0.01	x__sub0.01	x__sub0.01	x__sub0.01	x__sub0.01	x__sub0.01	x__sub0.01	0	0	0	0	0	0	0	0	0	0	0	0	0	0	0	0	0	0	0	0	0	0	0	0	0	0	0	0	0	0	0	0	0	0	0	0	0	0	0	0	0	0
978166513811e95d1d55d1a49f1f8206_rep;size=62;	x__sub0.01	x__sub0.01	x__sub0.01	x__sub0.01	x__sub0.01	x__sub0.01	x__sub0.01	0	0	0	1	0	0	0	0	0	0	0	0	1	2	5	4	0	1	3	1	1	0	1	0	0	1	2	4	0	1	1	0	0	0	1	1	0	1	1	2	0	1
55ec0475ef03b38b45236b8b2f1696f4_rep;size=62;	x__sub0.01	x__sub0.01	x__sub0.01	x__sub0.01	x__sub0.01	x__sub0.01	x__sub0.01	0	0	0	0	0	0	1	0	0	0	0	0	0	0	0	0	0	0	0	0	0	0	0	0	0	0	0	0	0	0	0	0	0	0	0	0	0	0	0	0	0	0
723b3d5e65174fd12908ddb01152f653_rep;size=62;	x__sub0.01	x__sub0.01	x__sub0.01	x__sub0.01	x__sub0.01	x__sub0.01	x__sub0.01	0	0	0	0	1	0	0	0	3	0	0	0	0	0	0	0	0	0	0	0	2	0	0	0	1	0	0	0	3	0	0	0	1	0	0	0	6	0	0	0	2	0
53d775bf1263ef2a857767d25e21fdc6_rep;size=62;	x__sub0.01	x__sub0.01	x__sub0.01	x__sub0.01	x__sub0.01	x__sub0.01	x__sub0.01	0	0	1	0	1	0	0	0	1	0	2	0	1	3	6	3	0	0	2	0	1	0	0	5	1	0	1	0	0	0	0	0	0	0	0	1	1	0	1	0	1	0
b0ac49281f62d0f78e1a925856f0c614_rep;size=62;	x__sub0.01	x__sub0.01	x__sub0.01	x__sub0.01	x__sub0.01	x__sub0.01	x__sub0.01	0	0	0	0	0	0	0	0	0	1	0	0	0	0	0	0	0	0	0	0	0	0	0	0	0	0	0	0	0	0	0	0	0	0	0	0	0	0	0	0	0	0
72271ece14d247a3db9b4d95bfa9abdb_rep;size=62;	x__sub0.01	x__sub0.01	x__sub0.01	x__sub0.01	x__sub0.01	x__sub0.01	x__sub0.01	0	0	0	0	0	0	0	0	0	0	0	0	0	0	0	0	0	0	0	0	0	0	0	0	0	0	0	0	0	0	0	0	0	0	0	0	0	0	0	0	0	0
7edb43b9cfcd547f1dfcab4896a03393_rep;size=61;	x__sub0.01	x__sub0.01	x__sub0.01	x__sub0.01	x__sub0.01	x__sub0.01	x__sub0.01	0	0	0	0	0	0	0	0	0	0	0	1	0	1	0	0	0	0	0	1	0	0	0	1	0	0	0	3	0	0	0	1	0	0	2	2	0	0	0	1	0	1
498b646c0f83421ad6fa1ca3796d5036_rep;size=61;	x__sub0.01	x__sub0.01	x__sub0.01	x__sub0.01	x__sub0.01	x__sub0.01	x__sub0.01	0	0	0	0	0	0	0	0	0	0	0	0	0	0	0	0	0	0	0	1	0	0	0	0	0	0	0	0	0	0	0	0	0	0	0	0	0	0	0	0	0	0
d4a6a9787f93d42136fc0e6c77741a23_rep;size=61;	x__sub0.01	x__sub0.01	x__sub0.01	x__sub0.01	x__sub0.01	x__sub0.01	x__sub0.01	0	0	0	0	0	0	0	0	1	0	0	0	0	0	0	0	1	0	0	0	0	0	0	0	0	0	0	0	0	0	0	0	0	0	0	0	6	0	0	0	0	0
335748838cc89b51f9f438f2101e1d19_rep;size=61;	x__sub0.01	x__sub0.01	x__sub0.01	x__sub0.01	x__sub0.01	x__sub0.01	x__sub0.01	0	0	0	0	0	0	0	0	0	0	0	0	0	0	0	0	0	0	0	1	0	0	0	0	0	0	0	0	0	0	0	0	0	0	0	0	0	0	0	0	0	0
2909aea0e9abafab771aaa682c4aba99_rep;size=60;	x__sub0.01	x__sub0.01	x__sub0.01	x__sub0.01	x__sub0.01	x__sub0.01	x__sub0.01	0	0	0	0	0	0	0	0	0	0	0	0	0	0	0	0	0	0	0	0	0	0	0	0	0	0	0	0	0	0	0	0	0	0	0	0	0	0	0	0	0	0
4146d1d37caae11235e74cd8f7a7055b_rep;size=60;	x__sub0.01	x__sub0.01	x__sub0.01	x__sub0.01	x__sub0.01	x__sub0.01	x__sub0.01	0	0	0	0	0	0	0	0	0	0	0	0	0	0	0	0	0	0	0	0	0	0	0	0	0	0	0	1	0	0	0	0	0	0	0	1	0	0	0	0	0	0
aad598d3bb03a07b473874300a44a9e2_rep;size=60;	x__sub0.01	x__sub0.01	x__sub0.01	x__sub0.01	x__sub0.01	x__sub0.01	x__sub0.01	0	0	0	0	0	0	0	0	0	0	0	1	0	0	0	1	0	0	0	0	0	0	0	0	0	0	0	2	0	0	0	0	0	0	0	0	0	0	0	1	0	0
33ba16243cee08fe4461ebd3a752b629_rep;size=60;	x__sub0.01	x__sub0.01	x__sub0.01	x__sub0.01	x__sub0.01	x__sub0.01	x__sub0.01	0	0	0	0	0	0	0	0	0	0	0	0	0	0	0	0	1	0	0	0	0	0	0	0	0	0	0	0	0	0	0	0	0	0	0	0	0	0	0	0	0	0
33b8ce533517427533f2850949421a63_rep;size=60;	x__sub0.01	x__sub0.01	x__sub0.01	x__sub0.01	x__sub0.01	x__sub0.01	x__sub0.01	0	0	0	0	0	0	0	0	0	0	0	0	0	0	0	0	0	0	0	0	0	0	0	0	0	0	0	0	0	0	0	0	0	0	0	0	0	0	0	0	0	0
8a84d9aa292dc29a1f1780253da88c1b_rep;size=59;	x__sub0.01	x__sub0.01	x__sub0.01	x__sub0.01	x__sub0.01	x__sub0.01	x__sub0.01	0	0	0	0	0	0	0	0	3	0	0	0	1	0	0	0	4	0	0	0	0	0	0	0	1	0	0	0	1	0	0	0	0	0	0	0	3	0	0	0	0	0
1e71f3365c0288d0f47bd77f0701e9f8_rep;size=59;	x__sub0.01	x__sub0.01	x__sub0.01	x__sub0.01	x__sub0.01	x__sub0.01	x__sub0.01	0	0	0	0	0	0	0	0	3	0	0	0	1	0	0	0	0	0	0	0	1	0	0	0	0	0	0	0	1	0	0	0	0	0	0	0	4	0	0	0	4	0
5bf487047c7a3413bdc0a14286f5b185_rep;size=59;	x__sub0.01	x__sub0.01	x__sub0.01	x__sub0.01	x__sub0.01	x__sub0.01	x__sub0.01	0	0	0	0	1	0	0	0	5	0	0	0	0	0	0	0	0	0	0	0	0	0	0	0	1	0	0	0	6	0	0	0	1	0	0	0	2	0	0	0	1	0
32a6d6a5a1b09cf22db90d31dbabcb8a_rep;size=59;	x__sub0.01	x__sub0.01	x__sub0.01	x__sub0.01	x__sub0.01	x__sub0.01	x__sub0.01	0	2	1	0	0	1	2	0	0	0	0	0	0	0	0	1	0	1	0	2	0	1	0	0	0	1	4	4	0	2	0	3	0	1	0	3	0	0	2	5	0	0
800541b9527be6b1d2e37efa23b2ffea_rep;size=58;	x__sub0.01	x__sub0.01	x__sub0.01	x__sub0.01	x__sub0.01	x__sub0.01	x__sub0.01	0	0	0	0	0	0	0	0	4	0	0	0	0	0	0	0	0	0	0	0	0	0	0	0	0	0	0	0	0	0	0	0	0	0	0	0	0	0	0	0	0	0
d64f82d69579d34e13eb4fc1f26588e3_rep;size=58;	x__sub0.01	x__sub0.01	x__sub0.01	x__sub0.01	x__sub0.01	x__sub0.01	x__sub0.01	0	0	0	0	1	0	0	0	1	0	0	0	6	0	0	0	4	0	0	0	2	0	0	0	0	0	0	0	1	0	0	0	1	0	0	0	3	0	0	0	3	0
93b0b15d5148ef1d1d7b9787c825575f_rep;size=58;	x__sub0.01	x__sub0.01	x__sub0.01	x__sub0.01	x__sub0.01	x__sub0.01	x__sub0.01	1	0	0	0	3	0	0	0	2	0	0	0	1	0	0	0	3	0	0	0	2	0	0	0	1	0	0	0	2	0	0	0	0	0	0	0	4	0	0	0	1	0
405f541a3294e88778b232e5afcd2725_rep;size=58;	x__sub0.01	x__sub0.01	x__sub0.01	x__sub0.01	x__sub0.01	x__sub0.01	x__sub0.01	0	2	1	0	0	0	1	0	0	1	0	0	0	0	2	2	0	0	0	1	0	1	2	2	0	0	8	7	0	1	3	2	0	0	1	1	0	0	3	5	0	0
19bef8422def41d0ccdcd24782a2d21f_rep;size=58;	x__sub0.01	x__sub0.01	x__sub0.01	x__sub0.01	x__sub0.01	x__sub0.01	x__sub0.01	1	0	0	0	0	0	0	0	0	0	0	0	0	0	0	0	0	0	0	0	0	0	0	0	0	0	0	0	0	0	0	0	0	0	0	0	0	0	0	0	0	0
63cd71b52f448ffe75d13c066916907e_rep;size=58;	x__sub0.01	x__sub0.01	x__sub0.01	x__sub0.01	x__sub0.01	x__sub0.01	x__sub0.01	0	0	0	0	0	0	0	0	0	0	1	0	0	0	0	0	0	0	0	0	0	0	0	0	0	0	0	0	0	0	0	0	0	0	0	0	0	0	0	0	0	0
a06f74cfb491272aea998ba4c2857c49_rep;size=58;	x__sub0.01	x__sub0.01	x__sub0.01	x__sub0.01	x__sub0.01	x__sub0.01	x__sub0.01	0	0	0	0	0	0	0	0	0	0	0	0	0	0	0	0	0	0	0	0	0	0	0	0	0	0	0	0	0	0	0	0	0	0	0	0	0	0	0	0	0	0
ad234e169369c433b3ad2e56d8f25b09_rep;size=58;	x__sub0.01	x__sub0.01	x__sub0.01	x__sub0.01	x__sub0.01	x__sub0.01	x__sub0.01	1	0	0	0	1	0	0	0	0	0	0	0	1	0	0	0	0	0	0	0	0	0	0	0	1	0	0	0	0	0	0	0	1	0	0	0	0	0	0	0	0	0
1ab9b12a5e5dfd37759110a9267e7fc2_rep;size=58;	x__sub0.01	x__sub0.01	x__sub0.01	x__sub0.01	x__sub0.01	x__sub0.01	x__sub0.01	0	0	0	0	0	0	0	0	1	0	0	0	1	0	0	0	2	0	0	0	0	0	0	0	3	0	0	0	4	0	0	0	1	0	0	0	6	0	0	0	0	0
ead7b524235296c0b35476ebabbd812d_rep;size=57;	x__sub0.01	x__sub0.01	x__sub0.01	x__sub0.01	x__sub0.01	x__sub0.01	x__sub0.01	0	0	0	0	0	0	0	0	4	0	0	0	0	0	0	0	0	0	0	0	0	0	0	0	0	0	0	0	1	0	0	0	1	0	0	0	0	0	0	0	6	0
5c6f6ee81a86c9c2bc66835cfc591080_rep;size=57;	x__sub0.01	x__sub0.01	x__sub0.01	x__sub0.01	x__sub0.01	x__sub0.01	x__sub0.01	2	0	0	0	1	0	0	0	3	0	0	0	3	0	0	0	2	0	0	0	3	0	0	0	0	0	0	1	1	0	0	0	0	0	0	0	4	0	0	0	0	0
8715f9c25a4c5760c452b5ed89b6b039_rep;size=57;	x__sub0.01	x__sub0.01	x__sub0.01	x__sub0.01	x__sub0.01	x__sub0.01	x__sub0.01	0	0	0	0	0	0	0	0	0	0	0	0	0	0	0	0	0	0	0	0	0	0	0	0	0	0	0	0	0	0	0	0	0	0	0	0	0	0	0	0	0	0
ba398734640328c001eb221bfdd63b31_rep;size=57;	x__sub0.01	x__sub0.01	x__sub0.01	x__sub0.01	x__sub0.01	x__sub0.01	x__sub0.01	0	0	0	0	0	0	0	0	0	0	0	0	0	0	0	0	0	0	0	0	0	0	0	0	0	0	0	0	0	0	0	0	0	0	0	0	0	0	0	0	0	0
ec90ab431649e3be843beca4c2017ff6_rep;size=57;	x__sub0.01	x__sub0.01	x__sub0.01	x__sub0.01	x__sub0.01	x__sub0.01	x__sub0.01	0	0	0	0	0	0	0	0	0	0	0	0	0	0	0	0	0	0	0	0	0	0	0	0	0	0	0	0	0	0	0	0	0	0	0	0	0	0	0	0	0	0
54893ff65cdea00ff4d66edf2cdc2f3a_rep;size=57;	x__sub0.01	x__sub0.01	x__sub0.01	x__sub0.01	x__sub0.01	x__sub0.01	x__sub0.01	0	0	0	0	0	0	0	0	0	0	0	0	0	0	0	0	0	0	0	0	0	0	0	0	0	0	0	0	0	0	0	0	0	0	0	0	0	0	0	0	0	0
ee088be7b5d886daa69edecf28130b4e_rep;size=57;	x__sub0.01	x__sub0.01	x__sub0.01	x__sub0.01	x__sub0.01	x__sub0.01	x__sub0.01	0	0	0	0	0	0	0	0	0	0	0	0	0	0	0	0	0	0	0	0	0	0	0	0	0	0	0	0	0	0	0	0	0	0	0	0	0	0	0	0	0	0
49261813a8bfc76070ef3930bab639f1_rep;size=57;	x__sub0.01	x__sub0.01	x__sub0.01	x__sub0.01	x__sub0.01	x__sub0.01	x__sub0.01	0	0	0	0	0	0	0	0	0	0	0	0	0	0	0	0	0	0	0	0	0	0	0	0	0	0	0	0	0	0	0	0	0	0	0	0	0	0	0	0	0	0
e66d2b7ca195418e68d63ead00582c1f_rep;size=57;	x__sub0.01	x__sub0.01	x__sub0.01	x__sub0.01	x__sub0.01	x__sub0.01	x__sub0.01	0	0	0	0	0	0	0	0	0	0	0	0	0	0	0	0	0	0	0	0	0	0	0	0	0	0	0	0	0	0	0	0	0	0	0	0	0	0	1	0	0	0
dc3c4c18bed7669d669ff3c7f5f35206_rep;size=57;	x__sub0.01	x__sub0.01	x__sub0.01	x__sub0.01	x__sub0.01	x__sub0.01	x__sub0.01	0	0	0	0	0	0	0	0	0	0	0	0	0	0	0	0	0	0	0	0	0	0	0	0	0	0	0	0	0	0	0	0	0	0	0	0	0	0	0	0	0	0
214f0ba9c393706c3eea686ee7b539a7_rep;size=56;	x__sub0.01	x__sub0.01	x__sub0.01	x__sub0.01	x__sub0.01	x__sub0.01	x__sub0.01	0	0	0	0	0	0	0	0	3	0	0	0	0	0	0	0	0	0	0	0	4	0	0	0	0	0	0	0	0	0	0	0	0	0	0	0	0	0	0	0	0	0
43bb54380282efa72d2d3aab3b26bb9e_rep;size=56;	x__sub0.01	x__sub0.01	x__sub0.01	x__sub0.01	x__sub0.01	x__sub0.01	x__sub0.01	0	0	0	0	0	0	0	0	0	0	3	0	0	0	0	0	0	0	0	0	0	0	0	0	0	0	0	0	0	0	0	1	0	0	0	0	0	0	0	0	0	0
127ea29c13093c1891fe5535f76034dd_rep;size=56;	x__sub0.01	x__sub0.01	x__sub0.01	x__sub0.01	x__sub0.01	x__sub0.01	x__sub0.01	0	0	0	0	0	0	0	0	0	0	0	0	0	0	0	0	53	0	0	0	0	0	0	0	0	0	0	0	0	0	0	0	0	0	0	0	0	0	0	0	0	0
4056d659fec3d66c6311494dfe65359a_rep;size=56;	x__sub0.01	x__sub0.01	x__sub0.01	x__sub0.01	x__sub0.01	x__sub0.01	x__sub0.01	2	0	0	0	0	0	0	0	14	0	0	0	1	0	0	0	1	0	0	0	10	0	0	0	0	0	0	0	0	0	0	0	2	0	0	0	5	0	0	0	1	0
ee8e55bf8f90c3ce0642c6c11329ba7a_rep;size=56;	x__sub0.01	x__sub0.01	x__sub0.01	x__sub0.01	x__sub0.01	x__sub0.01	x__sub0.01	0	0	0	0	0	0	0	0	18	0	0	0	0	0	0	0	0	0	0	0	0	0	0	0	0	0	0	0	0	0	0	0	4	0	0	0	0	1	0	0	0	0
9c21c0872c0f363142f98a7cd974147c_rep;size=56;	x__sub0.01	x__sub0.01	x__sub0.01	x__sub0.01	x__sub0.01	x__sub0.01	x__sub0.01	0	1	0	0	0	0	0	0	0	0	1	1	0	0	0	0	0	0	0	0	0	0	0	0	0	0	0	0	0	0	0	0	0	0	0	0	0	0	0	1	0	0
ff879610726e26f097a175368be91e21_rep;size=56;	x__sub0.01	x__sub0.01	x__sub0.01	x__sub0.01	x__sub0.01	x__sub0.01	x__sub0.01	0	0	1	2	0	0	2	1	0	0	1	1	0	0	0	0	0	0	0	1	0	0	1	0	0	1	1	1	0	0	0	1	0	0	1	3	0	0	0	2	0	0
819cb4cff749cf293d5cc4071a380740_rep;size=56;	x__sub0.01	x__sub0.01	x__sub0.01	x__sub0.01	x__sub0.01	x__sub0.01	x__sub0.01	0	0	0	0	0	0	0	0	0	0	0	0	0	0	0	0	0	0	0	0	0	0	0	0	0	0	0	0	0	0	0	0	0	0	0	0	0	0	0	0	0	0
afaf4beaa18221294ff959f6d382b4a2_rep;size=55;	x__sub0.01	x__sub0.01	x__sub0.01	x__sub0.01	x__sub0.01	x__sub0.01	x__sub0.01	0	0	0	0	0	0	0	0	0	0	0	0	0	0	0	0	0	0	0	0	0	0	0	0	0	0	0	0	0	0	0	0	0	0	0	0	0	0	0	0	0	0
47cebfcd84ab268b3f019ba79bb85181_rep;size=55;	x__sub0.01	x__sub0.01	x__sub0.01	x__sub0.01	x__sub0.01	x__sub0.01	x__sub0.01	0	0	0	0	0	0	0	0	0	0	0	0	0	0	0	0	0	0	0	0	0	0	0	0	2	0	0	0	0	0	0	0	0	0	0	0	0	0	0	0	0	0
307fbe571ee3118b34c1eadbc3ac45d0_rep;size=55;	x__sub0.01	x__sub0.01	x__sub0.01	x__sub0.01	x__sub0.01	x__sub0.01	x__sub0.01	0	0	0	0	0	0	0	0	0	0	0	0	0	0	0	0	0	0	0	0	0	0	0	0	0	0	0	0	0	0	0	0	0	0	0	0	0	0	0	0	0	0
7d2676b91d45cc66c7bc3f2d4628ad09_rep;size=55;	x__sub0.01	x__sub0.01	x__sub0.01	x__sub0.01	x__sub0.01	x__sub0.01	x__sub0.01	0	0	0	0	0	0	0	0	0	0	0	0	0	0	0	1	0	0	0	0	0	0	0	0	0	0	0	1	0	0	0	0	0	0	1	0	0	0	0	1	0	0
ca61d1b7d8cb7bffb94215991921944a_rep;size=55;	x__sub0.01	x__sub0.01	x__sub0.01	x__sub0.01	x__sub0.01	x__sub0.01	x__sub0.01	0	0	0	0	0	0	0	0	0	0	0	0	0	0	0	0	0	0	0	0	0	0	0	0	0	0	0	0	0	0	0	0	0	0	0	0	0	0	0	0	0	0
8d8dd5fee6905f64180540ba46b37189_rep;size=55;	x__sub0.01	x__sub0.01	x__sub0.01	x__sub0.01	x__sub0.01	x__sub0.01	x__sub0.01	0	0	0	1	1	1	0	0	0	0	0	0	0	1	1	6	0	0	2	3	3	0	0	0	1	0	0	0	0	0	0	1	0	0	0	0	1	0	0	0	1	0
181eeb741ae92af9ae9bb56036f18893_rep;size=55;	x__sub0.01	x__sub0.01	x__sub0.01	x__sub0.01	x__sub0.01	x__sub0.01	x__sub0.01	0	0	0	0	0	0	0	0	0	0	0	0	3	0	0	0	0	0	0	0	7	0	0	0	0	0	0	0	0	0	0	0	0	0	0	0	2	0	0	0	2	0
52e7c922dd496dacba2ead37519c0b3b_rep;size=54;	x__sub0.01	x__sub0.01	x__sub0.01	x__sub0.01	x__sub0.01	x__sub0.01	x__sub0.01	2	0	0	0	0	0	0	0	1	0	0	0	0	0	0	0	1	0	0	0	2	0	0	0	3	0	0	0	0	0	0	0	0	0	0	0	0	0	0	0	0	0
8e72ae54e43e05e709357eb3cb9f8b3d_rep;size=54;	x__sub0.01	x__sub0.01	x__sub0.01	x__sub0.01	x__sub0.01	x__sub0.01	x__sub0.01	0	0	1	4	0	0	0	1	0	0	0	3	0	0	0	0	0	0	0	0	0	0	0	0	0	0	0	0	0	0	0	0	0	0	0	2	0	0	0	2	0	0
65a7ae8bd7cc5e810395a801da949a96_rep;size=54;	x__sub0.01	x__sub0.01	x__sub0.01	x__sub0.01	x__sub0.01	x__sub0.01	x__sub0.01	5	0	0	0	0	0	0	0	0	0	0	0	3	0	0	0	0	0	0	0	0	0	0	0	2	0	0	0	0	0	0	0	8	0	0	0	2	0	0	0	5	0
00413b26522b7e8caf1ec2cfc83407b1_rep;size=54;	x__sub0.01	x__sub0.01	x__sub0.01	x__sub0.01	x__sub0.01	x__sub0.01	x__sub0.01	0	0	0	0	0	0	0	0	0	0	0	0	0	0	0	0	0	0	0	0	0	0	0	0	0	0	0	0	0	0	0	1	0	0	0	0	0	0	0	0	0	0
6c1f9f3577413d1915073622c9e7878a_rep;size=54;	x__sub0.01	x__sub0.01	x__sub0.01	x__sub0.01	x__sub0.01	x__sub0.01	x__sub0.01	0	0	0	0	0	0	0	0	0	0	0	0	0	0	0	0	0	0	0	0	0	0	0	0	0	0	0	0	0	0	0	0	0	0	0	0	0	0	0	0	0	0
248831cbd926c3bb4217c2b5db4c7820_rep;size=54;	x__sub0.01	x__sub0.01	x__sub0.01	x__sub0.01	x__sub0.01	x__sub0.01	x__sub0.01	0	0	0	0	0	0	0	0	0	0	0	0	0	0	0	0	0	0	0	0	0	0	0	0	0	0	0	0	0	0	0	0	0	0	0	0	0	0	0	0	0	0
f1e50e5880b559259f94864a23f38196_rep;size=54;	x__sub0.01	x__sub0.01	x__sub0.01	x__sub0.01	x__sub0.01	x__sub0.01	x__sub0.01	0	0	0	0	0	0	0	0	0	0	0	0	0	0	0	0	0	0	0	0	0	0	0	1	0	0	0	0	0	0	0	0	0	0	0	0	0	0	0	0	0	0
a2964c9146ccb817004d99eafe31a68e_rep;size=53;	x__sub0.01	x__sub0.01	x__sub0.01	x__sub0.01	x__sub0.01	x__sub0.01	x__sub0.01	0	0	0	0	1	0	0	0	0	0	0	0	1	0	0	0	0	0	0	0	0	0	0	0	0	0	0	0	0	0	0	0	0	0	0	0	0	0	0	0	2	0
ab00112f7a09c49f234891c00f111b34_rep;size=53;	x__sub0.01	x__sub0.01	x__sub0.01	x__sub0.01	x__sub0.01	x__sub0.01	x__sub0.01	1	0	0	0	0	0	0	0	2	0	0	0	2	0	0	0	4	0	0	0	3	0	0	0	0	0	0	0	0	0	0	0	1	0	0	0	2	0	0	0	0	0
56336b9e9b012aa158e2a05ad8588b1e_rep;size=53;	x__sub0.01	x__sub0.01	x__sub0.01	x__sub0.01	x__sub0.01	x__sub0.01	x__sub0.01	0	0	0	0	0	0	0	0	0	0	0	0	0	0	0	0	0	0	0	0	0	0	0	0	0	0	0	0	0	0	0	0	0	0	0	0	0	0	0	0	0	0
55a6344d32dc197b13658e4a0896034e_rep;size=53;	x__sub0.01	x__sub0.01	x__sub0.01	x__sub0.01	x__sub0.01	x__sub0.01	x__sub0.01	0	0	0	0	0	0	0	0	0	0	2	0	0	0	0	0	0	0	0	0	0	0	0	0	0	0	0	0	0	0	0	0	0	0	0	0	0	0	0	0	0	0
cf3e950a6893c53b4409b18b37c3608a_rep;size=53;	x__sub0.01	x__sub0.01	x__sub0.01	x__sub0.01	x__sub0.01	x__sub0.01	x__sub0.01	2	0	0	0	1	0	0	0	0	0	0	0	0	0	0	0	0	0	1	0	1	0	0	1	0	0	1	0	1	0	0	0	2	0	0	0	0	0	0	0	4	0
8579ac84c3390bdd59ef7118401c1bc8_rep;size=53;	x__sub0.01	x__sub0.01	x__sub0.01	x__sub0.01	x__sub0.01	x__sub0.01	x__sub0.01	1	0	0	0	0	2	0	0	0	0	0	0	0	0	1	0	0	0	1	4	0	1	1	0	1	0	0	0	0	0	1	0	0	0	0	0	0	0	1	0	0	0
27b1dd954162ee853e7710bbb8efe9e1_rep;size=53;	x__sub0.01	x__sub0.01	x__sub0.01	x__sub0.01	x__sub0.01	x__sub0.01	x__sub0.01	0	2	2	0	0	3	3	1	0	2	2	1	0	1	0	0	0	1	0	1	0	1	0	0	0	1	1	3	0	0	2	1	0	2	0	2	0	1	0	3	0	2
958644f772c69120ff228b8469386c27_rep;size=53;	x__sub0.01	x__sub0.01	x__sub0.01	x__sub0.01	x__sub0.01	x__sub0.01	x__sub0.01	0	0	0	0	0	0	0	0	0	0	0	0	0	0	0	1	0	0	0	0	0	0	0	0	0	0	0	0	0	0	0	0	0	0	0	0	0	0	0	0	3	0
c539f2354715759343da506089d28a62_rep;size=53;	x__sub0.01	x__sub0.01	x__sub0.01	x__sub0.01	x__sub0.01	x__sub0.01	x__sub0.01	0	0	0	0	0	0	0	0	0	0	0	0	0	0	0	0	0	0	0	0	0	0	0	0	0	0	0	0	0	0	0	0	0	0	0	0	0	0	0	0	0	0
194bb0d8568243674324740b41bf06da_rep;size=52;	x__sub0.01	x__sub0.01	x__sub0.01	x__sub0.01	x__sub0.01	x__sub0.01	x__sub0.01	0	0	0	0	0	0	0	0	0	0	0	0	0	0	0	0	0	0	0	0	0	0	0	0	0	0	0	0	0	0	0	0	0	0	0	0	0	0	0	0	0	0
78060fe7b91211567934c7cb25bf3eb6_rep;size=52;	x__sub0.01	x__sub0.01	x__sub0.01	x__sub0.01	x__sub0.01	x__sub0.01	x__sub0.01	0	0	0	0	0	0	0	0	0	1	0	0	0	0	0	0	0	0	0	0	0	0	0	0	0	0	0	1	0	0	0	0	0	0	0	0	0	0	0	0	0	0
a60c520f9173bfe2ae0dbfe4d3cf5737_rep;size=52;	x__sub0.01	x__sub0.01	x__sub0.01	x__sub0.01	x__sub0.01	x__sub0.01	x__sub0.01	0	0	0	0	0	0	1	0	0	0	0	0	0	1	1	1	0	2	0	4	0	0	0	1	0	3	3	10	0	0	0	2	0	0	2	2	0	0	0	5	0	1
9995fdb9792b60af1068d34d9cf572b4_rep;size=52;	x__sub0.01	x__sub0.01	x__sub0.01	x__sub0.01	x__sub0.01	x__sub0.01	x__sub0.01	0	0	0	0	0	0	0	0	0	0	0	0	2	0	0	0	1	0	0	0	0	0	0	0	0	0	0	0	0	0	0	0	0	0	0	0	0	0	0	0	0	0
566e5a684ace41df8f9e8228648ec52b_rep;size=52;	x__sub0.01	x__sub0.01	x__sub0.01	x__sub0.01	x__sub0.01	x__sub0.01	x__sub0.01	0	0	0	0	0	0	0	0	0	0	0	0	0	0	0	0	0	0	0	0	0	0	0	0	0	0	0	0	0	0	0	0	0	0	0	0	0	0	0	0	1	0
ddfeb9992950f2763630669a408bcccd_rep;size=52;	x__sub0.01	x__sub0.01	x__sub0.01	x__sub0.01	x__sub0.01	x__sub0.01	x__sub0.01	0	3	0	1	0	1	0	1	0	1	0	1	0	3	1	0	1	1	0	0	0	1	2	1	0	0	0	1	0	1	0	3	2	1	2	3	1	1	0	0	0	0
744f15c2ae8e186c3fbabfee7b7e166f_rep;size=52;	x__sub0.01	x__sub0.01	x__sub0.01	x__sub0.01	x__sub0.01	x__sub0.01	x__sub0.01	0	0	0	1	0	0	0	0	0	0	0	0	0	0	0	0	0	0	0	0	0	0	0	0	0	0	0	0	0	0	0	0	0	0	0	0	2	0	0	1	0	0
63081685d2f3f0b92bd52611c263a7c4_rep;size=52;	x__sub0.01	x__sub0.01	x__sub0.01	x__sub0.01	x__sub0.01	x__sub0.01	x__sub0.01	0	0	0	0	0	0	0	0	0	0	0	0	0	0	0	0	0	0	0	0	0	0	0	0	0	0	0	0	0	0	0	0	0	0	0	0	0	0	0	0	0	0
6b31441cd9201891af1035ae5b2449e0_rep;size=52;	x__sub0.01	x__sub0.01	x__sub0.01	x__sub0.01	x__sub0.01	x__sub0.01	x__sub0.01	0	0	0	0	0	1	0	0	0	0	0	0	0	0	0	0	0	0	0	0	0	0	0	0	0	0	0	0	0	0	0	0	0	0	0	0	0	0	0	0	0	0
1508258e65ac4271f995fa7b492fec84_rep;size=52;	x__sub0.01	x__sub0.01	x__sub0.01	x__sub0.01	x__sub0.01	x__sub0.01	x__sub0.01	0	0	0	0	0	0	0	0	0	0	0	0	0	0	0	0	0	0	0	0	0	0	0	0	0	0	0	0	0	0	0	0	0	0	0	0	0	0	0	0	0	0
d48259ef83be258b3bea6b631f183be6_rep;size=52;	x__sub0.01	x__sub0.01	x__sub0.01	x__sub0.01	x__sub0.01	x__sub0.01	x__sub0.01	1	0	0	0	0	0	0	0	0	0	0	0	0	0	0	0	0	0	0	0	0	0	0	1	0	0	1	0	0	0	0	0	0	0	0	0	0	0	0	0	0	0
ad196ee1f4100dda1b20d6412ca7b06e_rep;size=52;	x__sub0.01	x__sub0.01	x__sub0.01	x__sub0.01	x__sub0.01	x__sub0.01	x__sub0.01	0	0	0	0	0	0	0	0	0	0	0	0	0	0	0	0	0	0	0	0	0	0	0	0	0	0	0	0	0	0	0	0	0	0	0	0	0	0	0	0	0	0
e332c256a9fbf5b91ba4a40afd111df8_rep;size=52;	x__sub0.01	x__sub0.01	x__sub0.01	x__sub0.01	x__sub0.01	x__sub0.01	x__sub0.01	0	2	0	0	0	0	0	0	0	0	0	0	0	0	0	0	0	0	0	0	0	0	0	0	0	0	0	1	0	0	0	0	0	0	0	0	0	0	0	0	0	0
2836dcd9203852d7ede26162fc2ba8d1_rep;size=51;	x__sub0.01	x__sub0.01	x__sub0.01	x__sub0.01	x__sub0.01	x__sub0.01	x__sub0.01	0	0	0	0	0	0	0	0	0	0	0	0	0	0	0	0	0	0	0	0	0	0	0	0	0	0	0	0	0	0	0	0	0	0	0	0	0	0	0	0	0	0
fe0f821f636412a5b5ccd43e5a6069ce_rep;size=51;	x__sub0.01	x__sub0.01	x__sub0.01	x__sub0.01	x__sub0.01	x__sub0.01	x__sub0.01	0	0	0	0	0	0	0	0	0	0	0	0	2	0	0	0	1	0	0	0	0	0	1	0	0	0	0	0	5	0	0	0	0	0	0	0	4	0	0	0	0	0
1e246e9fe16b6ca9e6713cd4dfa749e6_rep;size=51;	x__sub0.01	x__sub0.01	x__sub0.01	x__sub0.01	x__sub0.01	x__sub0.01	x__sub0.01	0	0	0	0	0	0	0	0	3	0	0	0	1	0	0	0	0	0	0	0	3	0	0	0	0	0	0	0	4	0	0	0	0	0	0	0	3	0	0	0	1	0
9b7fda3c1e46211249ec08b0ca57204e_rep;size=51;	x__sub0.01	x__sub0.01	x__sub0.01	x__sub0.01	x__sub0.01	x__sub0.01	x__sub0.01	1	0	0	0	0	0	0	0	0	0	0	0	0	0	0	0	0	0	0	0	0	0	0	0	0	0	0	0	0	0	0	0	0	0	0	0	2	0	0	0	0	0
d14add0c01a6a7e5197e472f4f69020d_rep;size=51;	x__sub0.01	x__sub0.01	x__sub0.01	x__sub0.01	x__sub0.01	x__sub0.01	x__sub0.01	0	0	0	0	0	0	0	0	0	0	0	0	0	0	0	0	2	0	0	0	0	0	0	0	0	0	0	0	0	0	0	0	1	0	0	0	0	0	0	0	0	0
64ec00f4e016aead2b18a48e313f03bc_rep;size=51;	x__sub0.01	x__sub0.01	x__sub0.01	x__sub0.01	x__sub0.01	x__sub0.01	x__sub0.01	0	1	0	0	0	0	0	0	0	1	0	0	1	0	0	0	0	4	0	1	0	0	0	0	0	0	0	0	0	0	0	0	3	0	0	0	0	0	1	0	2	0
d12e649d346b247e9a361b48d07192d0_rep;size=51;	x__sub0.01	x__sub0.01	x__sub0.01	x__sub0.01	x__sub0.01	x__sub0.01	x__sub0.01	5	0	0	0	0	0	0	0	0	0	0	0	2	0	0	0	3	0	0	0	4	0	0	0	2	0	0	0	5	0	0	0	3	0	0	0	4	0	0	0	0	0
1e091961a29378b816ab32e23e3909bb_rep;size=51;	x__sub0.01	x__sub0.01	x__sub0.01	x__sub0.01	x__sub0.01	x__sub0.01	x__sub0.01	0	0	0	0	0	0	0	0	0	0	0	0	0	0	0	0	0	0	0	0	0	0	0	0	0	0	0	0	0	0	0	0	0	0	0	0	0	0	0	0	0	0
742bb6acd05ffe49ea9e3d652263e795_rep;size=51;	x__sub0.01	x__sub0.01	x__sub0.01	x__sub0.01	x__sub0.01	x__sub0.01	x__sub0.01	0	0	0	0	0	0	0	0	0	0	0	0	0	0	0	0	0	0	0	0	0	0	1	0	0	0	1	0	0	0	0	0	0	0	0	0	0	0	0	0	0	0
9423eb88fc94836fe9557537e6ab3320_rep;size=50;	x__sub0.01	x__sub0.01	x__sub0.01	x__sub0.01	x__sub0.01	x__sub0.01	x__sub0.01	0	0	0	0	1	0	0	0	1	0	0	0	5	0	0	0	5	0	0	0	1	0	0	0	0	0	0	0	0	0	0	0	1	0	0	0	1	0	0	0	0	0
6a97a6079cbac07efbf41445100cde2d_rep;size=50;	x__sub0.01	x__sub0.01	x__sub0.01	x__sub0.01	x__sub0.01	x__sub0.01	x__sub0.01	0	0	0	0	0	0	0	0	1	0	0	0	0	0	0	0	1	0	0	0	2	0	0	0	1	0	0	0	0	0	0	0	0	0	0	0	3	0	0	0	1	0
3f9628f2e14c9303a4be899c2c1b2444_rep;size=50;	x__sub0.01	x__sub0.01	x__sub0.01	x__sub0.01	x__sub0.01	x__sub0.01	x__sub0.01	0	0	0	0	0	0	0	0	0	0	0	0	9	0	0	0	0	0	0	0	1	0	0	0	0	0	0	0	1	0	0	0	0	0	0	0	3	0	0	0	0	0
005a1cb5c38abd6d45c339df2e725675_rep;size=50;	x__sub0.01	x__sub0.01	x__sub0.01	x__sub0.01	x__sub0.01	x__sub0.01	x__sub0.01	3	0	0	0	0	0	0	0	2	0	0	0	1	0	0	0	1	0	0	0	3	0	0	0	4	0	0	0	0	0	0	0	0	0	0	0	0	0	0	0	2	0
c3d21a28a9ed87e6a54e59cd0a83dfdc_rep;size=50;	x__sub0.01	x__sub0.01	x__sub0.01	x__sub0.01	x__sub0.01	x__sub0.01	x__sub0.01	0	0	0	0	0	0	0	0	0	0	0	0	0	0	0	0	0	0	0	0	0	0	0	0	0	0	0	0	0	0	0	0	0	0	0	0	0	0	0	0	0	0
783441180318c983f202fb0ee12d8fda_rep;size=50;	x__sub0.01	x__sub0.01	x__sub0.01	x__sub0.01	x__sub0.01	x__sub0.01	x__sub0.01	0	0	0	0	1	0	0	0	0	0	0	0	2	0	0	0	0	0	0	0	0	0	0	0	0	0	0	0	1	0	0	0	1	0	0	0	0	0	0	0	0	0
9c0df25d73f12987fde387e208bcbc95_rep;size=50;	x__sub0.01	x__sub0.01	x__sub0.01	x__sub0.01	x__sub0.01	x__sub0.01	x__sub0.01	0	0	0	0	0	0	0	0	0	0	0	0	0	0	0	0	0	0	0	0	0	0	0	0	0	0	0	0	0	0	0	1	0	0	0	0	0	0	0	0	0	0
341d792a2821f8cda162de3a9154ec04_rep;size=50;	x__sub0.01	x__sub0.01	x__sub0.01	x__sub0.01	x__sub0.01	x__sub0.01	x__sub0.01	0	0	0	0	0	0	0	0	0	0	0	0	0	0	0	0	0	0	0	0	0	0	0	0	0	0	0	0	0	0	0	0	0	0	0	0	0	0	0	0	0	0
f5a65d3f2840817989c3dbad6030aaf2_rep;size=50;	x__sub0.01	x__sub0.01	x__sub0.01	x__sub0.01	x__sub0.01	x__sub0.01	x__sub0.01	0	0	0	0	0	0	0	0	1	0	0	0	1	0	0	0	0	0	0	0	0	0	0	0	0	0	0	0	0	0	0	0	1	0	0	0	1	0	0	0	0	0
c6b7a246d24eceee277d7494de55df23_rep;size=50;	x__sub0.01	x__sub0.01	x__sub0.01	x__sub0.01	x__sub0.01	x__sub0.01	x__sub0.01	0	0	0	0	0	0	0	0	0	0	0	0	0	0	0	0	0	0	0	0	0	0	0	0	0	0	0	0	0	0	0	0	0	0	0	1	0	0	0	0	0	0
cc549b7f8cac799496873b21b0005d6b_rep;size=50;	x__sub0.01	x__sub0.01	x__sub0.01	x__sub0.01	x__sub0.01	x__sub0.01	x__sub0.01	0	0	0	0	0	0	0	0	0	0	0	0	0	0	0	0	0	0	0	0	0	0	0	0	0	0	0	0	0	0	0	1	0	0	0	0	0	0	0	0	0	0
fd50123d607d485498bb4eabf6735e7a_rep;size=50;	x__sub0.01	x__sub0.01	x__sub0.01	x__sub0.01	x__sub0.01	x__sub0.01	x__sub0.01	0	0	0	0	0	0	0	0	0	0	0	0	0	0	0	0	0	0	0	0	0	0	0	0	0	0	0	0	0	0	0	0	0	0	0	0	0	0	0	0	0	0
0e873cd659ef022d641153ddc5655ee3_rep;size=49;	x__sub0.01	x__sub0.01	x__sub0.01	x__sub0.01	x__sub0.01	x__sub0.01	x__sub0.01	0	0	0	0	0	0	0	0	2	0	0	0	0	0	0	0	0	0	0	0	1	0	0	0	0	0	0	0	0	0	0	0	1	0	0	0	0	0	0	0	2	0
bb92296cbdb36947622a6b4f0252b20c_rep;size=49;	x__sub0.01	x__sub0.01	x__sub0.01	x__sub0.01	x__sub0.01	x__sub0.01	x__sub0.01	0	0	0	0	0	0	0	0	0	0	0	0	0	0	0	0	0	0	0	0	0	0	0	0	0	0	0	0	0	0	0	0	0	0	0	0	0	0	0	0	0	0
7f785c6f7c103ac8523f4dc51e5a8720_rep;size=49;	x__sub0.01	x__sub0.01	x__sub0.01	x__sub0.01	x__sub0.01	x__sub0.01	x__sub0.01	0	0	1	0	0	0	1	1	0	0	0	0	0	0	0	0	0	0	0	0	0	0	2	0	0	0	0	0	0	0	0	0	0	1	0	0	0	0	0	0	0	0
cb7a2c6f3ba2d95fcf9cbb92de43d881_rep;size=49;	x__sub0.01	x__sub0.01	x__sub0.01	x__sub0.01	x__sub0.01	x__sub0.01	x__sub0.01	2	0	0	0	1	0	0	0	0	0	0	0	0	0	0	0	1	0	0	0	0	0	0	0	0	0	0	0	1	0	0	0	0	0	0	0	5	0	0	0	0	0
4c43cc22e259fb43eaaefd0eab54be4e_rep;size=49;	x__sub0.01	x__sub0.01	x__sub0.01	x__sub0.01	x__sub0.01	x__sub0.01	x__sub0.01	0	1	1	0	0	0	1	1	0	0	0	1	0	0	0	0	0	0	0	0	0	0	0	0	0	0	0	5	0	0	0	1	0	0	0	0	0	0	0	1	0	0
f5bab6ee472cf430345dd23432e0fa15_rep;size=49;	x__sub0.01	x__sub0.01	x__sub0.01	x__sub0.01	x__sub0.01	x__sub0.01	x__sub0.01	2	0	0	0	0	0	0	1	0	0	0	0	0	0	5	5	0	2	0	0	0	1	3	0	0	0	0	0	1	0	0	0	0	0	0	0	0	0	0	1	0	0
65f61b2f2e111341b26ce00ba1269052_rep;size=49;	x__sub0.01	x__sub0.01	x__sub0.01	x__sub0.01	x__sub0.01	x__sub0.01	x__sub0.01	0	2	0	0	0	0	0	0	0	0	1	0	0	1	0	0	0	0	0	0	0	1	1	0	0	1	2	5	0	3	2	0	0	1	2	1	0	0	5	6	0	0
7be328f48f079233bf4aeb24d39a99b0_rep;size=49;	x__sub0.01	x__sub0.01	x__sub0.01	x__sub0.01	x__sub0.01	x__sub0.01	x__sub0.01	0	0	0	0	0	0	0	0	0	0	0	0	0	0	2	0	0	0	0	0	0	0	0	0	0	0	3	2	0	0	0	1	0	0	0	0	0	0	0	1	0	0
0f6a885cdf3876f8fd72ad521270c9b1_rep;size=48;	x__sub0.01	x__sub0.01	x__sub0.01	x__sub0.01	x__sub0.01	x__sub0.01	x__sub0.01	0	0	0	0	1	0	0	0	3	0	0	0	1	0	0	0	0	0	0	0	2	0	0	0	1	0	0	0	0	0	0	0	3	0	0	0	6	0	0	0	0	0
17d3cf4f8a217374ace1aac6536e948d_rep;size=48;	x__sub0.01	x__sub0.01	x__sub0.01	x__sub0.01	x__sub0.01	x__sub0.01	x__sub0.01	0	0	0	0	0	0	0	0	6	0	0	0	0	0	0	0	0	0	0	0	0	0	0	0	0	0	0	0	0	0	0	0	0	0	0	0	0	0	0	0	0	0
64f318a96969e6a6b62aa5012eef12b0_rep;size=48;	x__sub0.01	x__sub0.01	x__sub0.01	x__sub0.01	x__sub0.01	x__sub0.01	x__sub0.01	0	0	0	0	0	0	0	0	0	0	0	0	0	0	0	0	0	0	0	0	0	0	0	0	0	0	0	0	0	0	0	0	0	0	0	0	0	0	0	0	24	0
158daa69fd0ee52716174b1eeb2d94aa_rep;size=48;	x__sub0.01	x__sub0.01	x__sub0.01	x__sub0.01	x__sub0.01	x__sub0.01	x__sub0.01	0	0	0	0	0	0	0	0	0	0	0	0	0	0	0	0	0	0	0	0	0	0	0	0	0	0	0	0	0	0	0	1	0	0	0	0	0	0	0	0	0	0
a5abde061bda137f1e6cb25547c89030_rep;size=48;	x__sub0.01	x__sub0.01	x__sub0.01	x__sub0.01	x__sub0.01	x__sub0.01	x__sub0.01	0	0	0	0	0	0	0	0	2	0	0	0	1	0	0	0	15	0	0	0	0	0	0	0	0	0	0	0	0	0	0	0	0	0	0	0	0	0	0	0	0	0
8fe989433d67d0e3ceedcf66ab7a76df_rep;size=48;	x__sub0.01	x__sub0.01	x__sub0.01	x__sub0.01	x__sub0.01	x__sub0.01	x__sub0.01	0	0	0	0	0	0	0	0	0	0	0	0	0	0	0	0	1	0	0	0	0	0	0	0	0	0	0	0	0	0	0	0	0	0	0	0	0	0	0	0	0	0
4b3b3d7bbb870c08ccc8f97e578e5068_rep;size=48;	x__sub0.01	x__sub0.01	x__sub0.01	x__sub0.01	x__sub0.01	x__sub0.01	x__sub0.01	0	0	0	0	0	0	0	0	0	0	0	0	0	0	0	0	0	0	0	0	0	0	0	0	0	0	0	0	0	0	0	0	0	0	0	0	0	0	0	0	0	0
1a605400cce55e538c0b25957cc287b8_rep;size=48;	x__sub0.01	x__sub0.01	x__sub0.01	x__sub0.01	x__sub0.01	x__sub0.01	x__sub0.01	0	0	0	0	0	0	0	0	1	0	0	0	0	0	0	0	0	0	0	0	1	0	0	0	0	0	0	0	0	0	0	0	0	0	0	0	0	0	0	0	0	0
706fa295e7bbf1ce77bc1f01fc47f6d9_rep;size=48;	x__sub0.01	x__sub0.01	x__sub0.01	x__sub0.01	x__sub0.01	x__sub0.01	x__sub0.01	0	0	0	0	0	0	0	0	0	1	0	0	0	0	0	0	0	0	0	0	0	0	0	0	0	0	0	0	0	0	0	0	0	0	0	0	0	0	0	0	0	0
82c4c327c9a89dbc0623e41c281267a9_rep;size=48;	x__sub0.01	x__sub0.01	x__sub0.01	x__sub0.01	x__sub0.01	x__sub0.01	x__sub0.01	0	0	0	0	0	0	0	0	0	0	0	0	0	0	0	0	0	0	0	0	0	0	0	0	0	0	0	0	0	0	0	0	0	0	0	0	0	0	0	0	0	0
0cb293c5ec271c01556979e156b9c390_rep;size=48;	x__sub0.01	x__sub0.01	x__sub0.01	x__sub0.01	x__sub0.01	x__sub0.01	x__sub0.01	0	0	0	0	0	0	0	0	0	0	0	0	0	0	0	0	0	0	0	0	0	0	0	0	0	0	0	0	0	0	0	0	0	0	0	0	0	0	0	0	0	0
63e7e4f9e03ca4eb54bff149a894bb2b_rep;size=47;	x__sub0.01	x__sub0.01	x__sub0.01	x__sub0.01	x__sub0.01	x__sub0.01	x__sub0.01	0	0	0	0	0	0	0	0	0	0	0	0	0	0	0	0	0	0	0	0	0	0	0	0	0	0	0	0	0	0	0	0	0	0	0	0	0	0	0	0	0	0
01793d8af5d4f3c1bbf6f204ddd36809_rep;size=47;	x__sub0.01	x__sub0.01	x__sub0.01	x__sub0.01	x__sub0.01	x__sub0.01	x__sub0.01	0	0	0	0	0	0	0	0	0	0	0	0	4	0	0	0	0	0	0	0	0	0	0	0	0	0	0	0	0	0	0	0	0	0	0	0	0	0	0	0	0	0
447646d8fae211d751b82f41d48bf562_rep;size=47;	x__sub0.01	x__sub0.01	x__sub0.01	x__sub0.01	x__sub0.01	x__sub0.01	x__sub0.01	0	0	0	0	0	0	0	0	0	0	0	0	0	0	0	0	0	0	0	0	0	0	0	0	0	0	0	0	0	0	0	0	0	0	0	0	0	0	0	0	0	0
e20bbcac0b52d43057b7bab554e6c1cc_rep;size=47;	x__sub0.01	x__sub0.01	x__sub0.01	x__sub0.01	x__sub0.01	x__sub0.01	x__sub0.01	0	0	0	0	0	0	0	0	0	0	0	0	0	0	0	0	0	0	0	0	0	0	0	0	0	0	0	0	0	0	0	0	0	0	0	0	0	0	0	0	0	0
c726f88bd19e90ee552e4e7e56b1aad2_rep;size=47;	x__sub0.01	x__sub0.01	x__sub0.01	x__sub0.01	x__sub0.01	x__sub0.01	x__sub0.01	0	0	0	0	1	0	0	0	0	0	0	0	2	0	0	0	8	0	0	0	0	0	0	0	3	0	0	0	1	0	0	0	0	0	0	0	0	0	0	0	1	0
a56818c76286b7bc5e6b94515d9bf528_rep;size=47;	x__sub0.01	x__sub0.01	x__sub0.01	x__sub0.01	x__sub0.01	x__sub0.01	x__sub0.01	0	0	0	0	0	0	0	0	0	0	0	0	0	0	0	0	0	0	0	0	0	0	0	0	0	0	0	0	0	0	0	0	0	0	0	0	0	0	0	0	0	0
4fbc04bf9096a7604bfd29d5c908b36e_rep;size=47;	x__sub0.01	x__sub0.01	x__sub0.01	x__sub0.01	x__sub0.01	x__sub0.01	x__sub0.01	0	0	0	0	0	0	0	0	0	0	0	0	0	0	0	0	0	0	0	0	0	0	0	0	0	0	0	1	0	0	0	0	0	0	0	0	0	0	0	0	0	0
65ea592ab558998a0edb42805ab1277a_rep;size=47;	x__sub0.01	x__sub0.01	x__sub0.01	x__sub0.01	x__sub0.01	x__sub0.01	x__sub0.01	0	0	0	0	0	0	0	0	0	0	0	0	0	0	0	0	0	0	0	0	0	0	0	0	0	0	0	0	0	0	0	0	0	0	0	0	0	0	0	0	0	0
a33ddc900e709cdaa222b6576c9f5824_rep;size=47;	x__sub0.01	x__sub0.01	x__sub0.01	x__sub0.01	x__sub0.01	x__sub0.01	x__sub0.01	0	0	0	0	0	0	0	0	0	0	0	3	0	0	0	0	0	0	0	0	0	0	0	0	0	1	0	0	0	0	0	0	0	0	2	0	0	0	0	0	0	0
223894f62a25a8ddaf9b84a21bb95dfd_rep;size=47;	x__sub0.01	x__sub0.01	x__sub0.01	x__sub0.01	x__sub0.01	x__sub0.01	x__sub0.01	0	0	0	0	0	0	0	0	0	0	0	0	0	0	0	0	0	0	0	0	0	0	0	0	0	0	0	0	0	0	0	0	0	0	0	0	0	0	0	0	0	0
52c7fc929c08611feb390bce46d113c1_rep;size=47;	x__sub0.01	x__sub0.01	x__sub0.01	x__sub0.01	x__sub0.01	x__sub0.01	x__sub0.01	0	0	0	0	0	0	0	0	0	0	0	0	0	0	0	0	0	0	0	0	0	0	0	0	0	0	0	0	0	0	0	0	0	0	0	0	0	0	0	0	0	0
09cdb4f6817eb1e5400b05404722dfe6_rep;size=46;	x__sub0.01	x__sub0.01	x__sub0.01	x__sub0.01	x__sub0.01	x__sub0.01	x__sub0.01	0	0	0	0	0	0	0	0	0	0	0	0	0	0	0	0	1	0	0	0	0	0	0	0	0	0	0	0	0	0	0	0	0	0	0	0	0	0	0	0	0	0
bf4a214d76a9d2aca4d182cd17065228_rep;size=46;	x__sub0.01	x__sub0.01	x__sub0.01	x__sub0.01	x__sub0.01	x__sub0.01	x__sub0.01	0	0	0	0	0	0	0	0	0	0	0	0	0	0	0	0	0	0	0	0	3	0	0	0	0	0	0	0	0	0	0	0	2	0	0	0	0	0	0	0	0	0
33c802fe85b28ae153e18f227378afb4_rep;size=46;	x__sub0.01	x__sub0.01	x__sub0.01	x__sub0.01	x__sub0.01	x__sub0.01	x__sub0.01	0	0	0	0	0	0	0	0	7	0	0	0	3	0	0	0	0	0	0	0	0	0	0	0	0	0	0	0	0	0	0	0	0	0	0	0	5	0	0	0	2	0
e3d7a0675973d62bf0d7a2cf338c567c_rep;size=46;	x__sub0.01	x__sub0.01	x__sub0.01	x__sub0.01	x__sub0.01	x__sub0.01	x__sub0.01	0	0	0	0	0	0	0	0	2	0	0	0	3	0	0	0	3	0	0	0	2	0	0	0	0	0	0	0	2	0	0	0	2	0	0	0	1	0	0	0	0	0
e5bea86c30e4654a255bb61676a3c0e0_rep;size=46;	x__sub0.01	x__sub0.01	x__sub0.01	x__sub0.01	x__sub0.01	x__sub0.01	x__sub0.01	0	0	0	0	0	0	0	0	0	1	0	0	0	0	2	2	0	0	2	0	0	0	0	0	0	0	1	2	0	3	1	4	0	0	2	2	0	0	1	7	0	0
fd72852cc9218fbd4048cfcfadcf26b8_rep;size=46;	x__sub0.01	x__sub0.01	x__sub0.01	x__sub0.01	x__sub0.01	x__sub0.01	x__sub0.01	0	0	0	0	0	0	0	0	0	0	0	0	0	0	0	0	0	0	0	0	0	0	0	0	0	0	0	0	0	0	0	0	0	0	0	0	0	0	0	0	0	0
0589ab0a3acaa481e99d67bf4cb989c4_rep;size=46;	x__sub0.01	x__sub0.01	x__sub0.01	x__sub0.01	x__sub0.01	x__sub0.01	x__sub0.01	1	0	0	0	0	0	0	0	0	0	0	0	0	0	0	0	0	0	0	0	0	0	0	1	0	0	0	0	0	0	0	0	0	0	0	0	0	0	0	0	0	0
64655a76e191ef2e146a668dc523b308_rep;size=46;	x__sub0.01	x__sub0.01	x__sub0.01	x__sub0.01	x__sub0.01	x__sub0.01	x__sub0.01	0	0	0	0	0	0	1	0	0	0	0	0	0	0	0	0	0	0	0	0	0	0	0	1	0	0	0	0	0	0	0	0	0	0	0	0	0	0	0	0	0	0
51e80d6fbd6cce9c8a8bb8ef385be8b5_rep;size=45;	x__sub0.01	x__sub0.01	x__sub0.01	x__sub0.01	x__sub0.01	x__sub0.01	x__sub0.01	0	0	0	0	0	0	0	0	0	0	0	0	0	0	0	0	0	0	0	0	0	0	0	0	0	0	0	0	1	0	0	0	0	0	0	0	0	0	0	0	0	0
a014d5e3f9cac79bd3285a7430c6c452_rep;size=45;	x__sub0.01	x__sub0.01	x__sub0.01	x__sub0.01	x__sub0.01	x__sub0.01	x__sub0.01	3	0	0	0	0	0	0	0	10	0	0	0	0	0	0	0	0	0	0	0	0	0	0	0	0	0	0	0	0	0	0	0	0	0	0	0	0	0	0	0	0	0
10deaaf10502524bb2791f6fea15eeb2_rep;size=45;	x__sub0.01	x__sub0.01	x__sub0.01	x__sub0.01	x__sub0.01	x__sub0.01	x__sub0.01	0	0	0	0	0	0	0	0	0	0	0	0	0	0	0	0	2	0	0	0	0	0	0	0	0	0	0	0	0	0	0	0	0	0	0	0	0	0	0	0	2	0
2744e07972ca973666f08eae44b09921_rep;size=45;	x__sub0.01	x__sub0.01	x__sub0.01	x__sub0.01	x__sub0.01	x__sub0.01	x__sub0.01	0	0	0	0	0	0	1	1	1	0	0	0	0	0	0	1	0	0	0	0	0	0	0	0	0	0	0	0	0	0	1	0	0	0	1	0	0	0	0	0	0	2
85d3f851e42d6a8204de7c4c29ea803a_rep;size=45;	x__sub0.01	x__sub0.01	x__sub0.01	x__sub0.01	x__sub0.01	x__sub0.01	x__sub0.01	0	0	0	0	0	0	0	0	3	0	0	0	1	0	0	0	1	0	0	0	5	0	0	0	1	0	0	0	2	0	0	0	0	0	0	0	1	0	0	0	0	0
2728f642a9be5a01b57d25dafbc2df92_rep;size=45;	x__sub0.01	x__sub0.01	x__sub0.01	x__sub0.01	x__sub0.01	x__sub0.01	x__sub0.01	0	0	1	0	0	0	0	0	0	0	0	0	0	0	0	0	0	0	0	0	0	0	0	0	0	0	0	0	0	0	0	0	0	0	0	0	0	0	0	0	0	0
cadbe730d4c5fd7cf87bcd3acc6f045c_rep;size=44;	x__sub0.01	x__sub0.01	x__sub0.01	x__sub0.01	x__sub0.01	x__sub0.01	x__sub0.01	1	0	0	0	0	0	0	0	0	0	0	0	0	0	0	0	0	0	0	0	0	0	0	0	0	0	0	0	0	0	0	0	0	0	0	0	1	0	0	0	4	0
91c6a167ba1cef183698bd3b5e115527_rep;size=44;	x__sub0.01	x__sub0.01	x__sub0.01	x__sub0.01	x__sub0.01	x__sub0.01	x__sub0.01	0	0	0	0	0	0	0	0	0	0	0	0	2	0	0	0	0	0	0	0	0	0	0	0	0	0	0	0	0	0	0	0	0	0	0	0	0	0	0	0	0	0
92e93cc95fefae18f4101e2436af6286_rep;size=44;	x__sub0.01	x__sub0.01	x__sub0.01	x__sub0.01	x__sub0.01	x__sub0.01	x__sub0.01	3	0	0	0	2	0	0	0	3	1	0	0	0	0	0	0	0	0	0	0	0	0	0	0	0	0	0	0	0	0	0	0	1	0	0	0	0	0	0	0	1	0
62a5ce4a655e7b6a3c63f8c7d97e07b4_rep;size=44;	x__sub0.01	x__sub0.01	x__sub0.01	x__sub0.01	x__sub0.01	x__sub0.01	x__sub0.01	0	0	0	0	0	0	0	0	2	0	0	0	0	0	0	0	1	0	0	0	10	0	0	0	4	0	0	0	0	0	0	0	0	0	0	0	0	0	0	0	10	0
8ddbb5275f0f64bccb08e91b72952e1d_rep;size=44;	x__sub0.01	x__sub0.01	x__sub0.01	x__sub0.01	x__sub0.01	x__sub0.01	x__sub0.01	0	0	0	0	0	0	0	0	0	0	0	0	0	0	0	0	0	0	0	0	0	0	0	0	0	0	0	0	0	0	0	0	0	0	0	0	0	0	0	0	0	0
da6b0b132d9ba5021a27992de9edd022_rep;size=44;	x__sub0.01	x__sub0.01	x__sub0.01	x__sub0.01	x__sub0.01	x__sub0.01	x__sub0.01	2	0	0	0	2	0	0	0	0	0	0	0	1	0	0	0	0	0	0	0	0	0	0	0	1	0	0	0	0	0	0	0	1	0	0	0	0	0	0	0	0	0
2c59a0d9626eafbe0071b78f3d3a0d5d_rep;size=44;	x__sub0.01	x__sub0.01	x__sub0.01	x__sub0.01	x__sub0.01	x__sub0.01	x__sub0.01	0	0	0	0	0	0	0	0	0	0	0	0	0	0	0	0	0	0	0	0	1	0	0	0	2	0	0	0	0	0	0	0	0	0	0	0	0	0	0	0	0	0
c0777b5d67230ef1572d12f087e574ac_rep;size=44;	x__sub0.01	x__sub0.01	x__sub0.01	x__sub0.01	x__sub0.01	x__sub0.01	x__sub0.01	0	0	0	0	0	0	0	0	1	0	0	0	0	0	0	0	2	0	0	0	0	0	0	0	0	0	0	0	0	0	0	0	0	0	0	0	0	0	0	0	0	0
a0f233d2c1ea102350ec9507d7969509_rep;size=44;	x__sub0.01	x__sub0.01	x__sub0.01	x__sub0.01	x__sub0.01	x__sub0.01	x__sub0.01	0	0	0	0	0	0	0	0	0	0	0	0	0	0	0	0	0	0	0	0	0	0	0	0	0	0	0	0	0	0	0	0	0	0	0	0	0	0	0	0	0	0
0f07a10c13a59035d1a9122c91baa0ed_rep;size=44;	x__sub0.01	x__sub0.01	x__sub0.01	x__sub0.01	x__sub0.01	x__sub0.01	x__sub0.01	0	0	0	0	2	0	0	0	3	0	0	0	0	0	0	0	0	0	0	0	0	0	0	0	0	0	0	0	1	0	0	0	0	0	0	0	0	0	0	0	0	0
124a07ae1f21d9e353dc52bd08d05764_rep;size=44;	x__sub0.01	x__sub0.01	x__sub0.01	x__sub0.01	x__sub0.01	x__sub0.01	x__sub0.01	0	0	0	0	0	0	0	0	0	0	0	0	0	0	0	0	0	0	0	0	0	0	0	0	0	0	0	0	0	0	0	0	0	0	0	0	0	0	0	0	0	0
f3ab575d96835e4ce757364a67f55edf_rep;size=44;	x__sub0.01	x__sub0.01	x__sub0.01	x__sub0.01	x__sub0.01	x__sub0.01	x__sub0.01	0	0	0	0	0	0	0	0	0	0	0	0	0	0	0	0	0	0	0	0	0	0	0	0	0	0	0	0	0	0	0	0	0	0	0	0	0	0	0	0	0	0
c1b180d515550897db1befc8891ba172_rep;size=43;	k__Fungi	k__Fungi	k__Fungi	k__Fungi	k__Fungi	k__Fungi	k__Fungi	0	0	0	0	0	0	0	0	0	0	0	0	0	0	0	0	0	0	0	0	0	0	0	0	0	0	0	0	0	0	0	0	0	0	0	0	0	0	0	0	0	0
9d84aaaba22d507fb6173e06b2a78a26_rep;size=43;	x__sub0.01	x__sub0.01	x__sub0.01	x__sub0.01	x__sub0.01	x__sub0.01	x__sub0.01	0	1	0	0	0	0	0	0	0	0	0	0	0	0	0	0	0	0	0	0	0	0	0	0	0	0	0	0	0	0	0	0	0	0	0	0	0	0	0	1	0	0
07e6c413b13b3a580ac187d56382a70e_rep;size=43;	x__sub0.01	x__sub0.01	x__sub0.01	x__sub0.01	x__sub0.01	x__sub0.01	x__sub0.01	0	0	0	0	0	0	0	0	0	0	0	0	4	0	0	0	0	0	0	0	0	0	0	0	0	0	0	0	0	0	0	0	0	0	0	0	0	0	0	0	0	0
b53a99fcae928d4fcd3fda8af5811aa1_rep;size=43;	x__sub0.01	x__sub0.01	x__sub0.01	x__sub0.01	x__sub0.01	x__sub0.01	x__sub0.01	0	0	0	0	0	0	0	0	0	0	0	0	0	0	0	0	0	0	0	0	0	0	0	0	0	0	0	0	0	0	0	0	0	0	0	0	0	0	0	0	0	0
b46840af68eafd724aac09df1ae66fef_rep;size=43;	x__sub0.01	x__sub0.01	x__sub0.01	x__sub0.01	x__sub0.01	x__sub0.01	x__sub0.01	0	0	0	0	0	0	0	0	1	0	0	0	0	0	0	0	2	0	0	0	0	0	0	0	0	0	0	0	0	0	0	0	1	0	0	0	0	0	0	0	0	0
7a36a2b25453fb77e9665c6a1379065e_rep;size=43;	x__sub0.01	x__sub0.01	x__sub0.01	x__sub0.01	x__sub0.01	x__sub0.01	x__sub0.01	0	0	0	0	4	0	0	0	0	0	0	0	0	0	0	0	0	0	0	0	5	0	0	0	3	0	0	0	0	0	0	0	0	0	0	0	0	0	0	0	18	0
37fcb20e6080ed524c7d0021853cc7b9_rep;size=43;	x__sub0.01	x__sub0.01	x__sub0.01	x__sub0.01	x__sub0.01	x__sub0.01	x__sub0.01	0	0	1	0	0	0	0	0	0	0	0	1	0	0	0	1	0	0	1	0	0	0	0	0	0	0	0	0	0	0	0	0	0	0	0	0	0	0	0	1	0	0
b2f26576d31019d3f02d7d1ef3e7e202_rep;size=43;	x__sub0.01	x__sub0.01	x__sub0.01	x__sub0.01	x__sub0.01	x__sub0.01	x__sub0.01	0	0	0	0	0	0	0	0	0	0	0	0	0	0	0	0	0	0	0	0	0	0	0	0	0	0	0	1	0	0	0	0	0	0	0	0	0	0	0	0	0	0
c530f9222c6ffb9fd1308c752f90993a_rep;size=43;	x__sub0.01	x__sub0.01	x__sub0.01	x__sub0.01	x__sub0.01	x__sub0.01	x__sub0.01	0	0	0	0	0	0	0	0	0	0	0	0	0	0	0	0	0	0	0	0	0	0	0	0	0	0	0	0	0	0	0	0	0	0	0	0	0	0	0	0	0	0
27c8a97b8f72adc163c2dc753cf270cf_rep;size=43;	x__sub0.01	x__sub0.01	x__sub0.01	x__sub0.01	x__sub0.01	x__sub0.01	x__sub0.01	0	0	0	0	0	0	0	0	0	0	0	0	0	0	0	0	0	0	0	0	0	0	0	0	0	0	0	0	0	0	0	0	0	0	0	0	0	0	0	0	0	0
c80ebc015a7fdbf788ce8681e781da67_rep;size=43;	x__sub0.01	x__sub0.01	x__sub0.01	x__sub0.01	x__sub0.01	x__sub0.01	x__sub0.01	0	0	0	0	0	0	0	0	0	0	0	0	0	0	0	1	0	0	0	1	0	0	0	2	0	0	1	1	0	0	0	0	0	1	0	0	0	0	0	1	0	0
4f7c4c0e47da6a67e717a9255094d3e2_rep;size=42;	x__sub0.01	x__sub0.01	x__sub0.01	x__sub0.01	x__sub0.01	x__sub0.01	x__sub0.01	0	0	0	0	0	0	0	0	0	0	0	0	0	0	0	0	0	0	0	0	0	0	0	0	0	0	0	0	1	0	0	0	0	0	0	0	0	0	0	0	4	0
ef0465822ae406ed6a074e8d42e77c68_rep;size=42;	x__sub0.01	x__sub0.01	x__sub0.01	x__sub0.01	x__sub0.01	x__sub0.01	x__sub0.01	0	0	0	0	0	0	0	0	3	0	0	0	0	0	0	0	0	0	0	0	0	0	0	0	0	0	0	0	0	0	0	0	0	0	0	0	0	0	0	0	0	0
13921224bcc8b0faa559ef1e5ea9a3fc_rep;size=42;	x__sub0.01	x__sub0.01	x__sub0.01	x__sub0.01	x__sub0.01	x__sub0.01	x__sub0.01	0	0	0	0	0	0	0	0	0	0	0	0	1	0	0	0	0	0	0	0	0	0	0	0	0	0	0	0	0	0	0	0	0	0	0	0	13	0	0	0	0	0
1932d5d7d17bac5e62f41933983bbc7a_rep;size=42;	x__sub0.01	x__sub0.01	x__sub0.01	x__sub0.01	x__sub0.01	x__sub0.01	x__sub0.01	0	0	0	0	1	0	0	0	0	0	0	0	0	0	0	0	0	0	0	0	0	0	0	0	2	0	0	0	0	0	0	0	2	0	0	0	0	0	0	0	0	0
0622aae1714a303977680f4df15f3467_rep;size=42;	x__sub0.01	x__sub0.01	x__sub0.01	x__sub0.01	x__sub0.01	x__sub0.01	x__sub0.01	0	0	0	0	2	0	0	0	0	0	0	0	0	0	0	0	3	0	0	0	1	0	0	0	0	0	0	0	0	0	0	0	2	0	0	0	0	0	0	0	0	0
f6535155b296acfb14b4d2b13b1d6a72_rep;size=42;	x__sub0.01	x__sub0.01	x__sub0.01	x__sub0.01	x__sub0.01	x__sub0.01	x__sub0.01	2	0	0	0	1	0	0	0	0	0	0	0	1	0	0	0	0	0	0	0	0	0	0	0	0	0	0	0	2	0	0	0	0	0	0	0	1	0	0	0	0	0
492eee88654ee094d8d20e521096f78f_rep;size=42;	x__sub0.01	x__sub0.01	x__sub0.01	x__sub0.01	x__sub0.01	x__sub0.01	x__sub0.01	0	0	0	0	0	0	0	0	0	0	0	0	0	0	0	0	0	0	0	0	0	0	0	0	0	0	0	0	0	0	0	0	0	0	0	0	0	0	0	0	0	0
a33fc8f4cb0f33f58230089d49b4c41d_rep;size=42;	x__sub0.01	x__sub0.01	x__sub0.01	x__sub0.01	x__sub0.01	x__sub0.01	x__sub0.01	0	0	0	0	0	0	0	0	0	1	0	0	0	0	0	0	0	0	0	0	0	0	0	0	0	0	0	0	0	0	0	0	0	0	0	0	0	0	0	0	0	0
ff36a9bf2dd2ecb4ecc41b7f45ed16ad_rep;size=42;	x__sub0.01	x__sub0.01	x__sub0.01	x__sub0.01	x__sub0.01	x__sub0.01	x__sub0.01	0	0	0	0	0	0	0	0	0	0	0	0	0	1	0	0	0	0	0	0	0	0	1	2	0	0	0	0	0	0	0	0	0	0	0	1	1	0	0	0	1	0
f108825ea8744c8f47ac5729ff816855_rep;size=42;	x__sub0.01	x__sub0.01	x__sub0.01	x__sub0.01	x__sub0.01	x__sub0.01	x__sub0.01	0	0	0	0	0	0	0	0	0	0	0	0	0	0	0	0	0	0	0	0	0	0	0	0	0	0	0	0	0	0	0	0	0	0	0	0	0	0	0	2	0	0
3ab345c2d685b349bdb34022408acd1a_rep;size=42;	x__sub0.01	x__sub0.01	x__sub0.01	x__sub0.01	x__sub0.01	x__sub0.01	x__sub0.01	0	0	0	0	0	0	0	0	0	0	0	0	0	0	0	0	0	0	0	0	0	0	0	0	0	0	0	0	0	0	0	0	0	0	0	0	0	0	0	0	1	0
9d659f705acfd2b35b34e99e09488942_rep;size=42;	x__sub0.01	x__sub0.01	x__sub0.01	x__sub0.01	x__sub0.01	x__sub0.01	x__sub0.01	0	0	0	0	0	0	0	0	0	0	0	0	0	0	0	0	0	0	0	0	0	0	0	0	0	0	0	0	0	0	0	0	0	0	0	0	0	0	0	0	0	0
177a1298e50bc12011d9dc21adf3956b_rep;size=42;	x__sub0.01	x__sub0.01	x__sub0.01	x__sub0.01	x__sub0.01	x__sub0.01	x__sub0.01	0	0	0	0	0	0	0	0	0	0	0	0	0	0	0	0	2	0	0	0	2	0	0	0	0	0	0	0	0	0	0	0	0	0	0	0	0	0	0	0	0	0
61bd30419fb301d0a54bbbe7e2f35667_rep;size=42;	x__sub0.01	x__sub0.01	x__sub0.01	x__sub0.01	x__sub0.01	x__sub0.01	x__sub0.01	0	0	2	2	0	0	0	0	0	1	0	1	0	1	2	0	0	1	1	0	1	0	0	1	0	0	0	0	2	0	0	0	0	0	0	1	0	1	2	2	1	0
7b7a913e849a366e93f33fc151d78e7e_rep;size=42;	x__sub0.01	x__sub0.01	x__sub0.01	x__sub0.01	x__sub0.01	x__sub0.01	x__sub0.01	0	0	0	0	0	0	0	0	0	0	0	0	0	0	0	0	0	0	0	0	0	0	0	0	0	0	0	2	0	0	0	0	0	0	0	0	0	0	0	0	0	0
15c3702f48b3d2343e6e45d6eaa3d5d9_rep;size=41;	x__sub0.01	x__sub0.01	x__sub0.01	x__sub0.01	x__sub0.01	x__sub0.01	x__sub0.01	0	0	0	0	0	0	0	0	0	0	0	0	0	0	0	0	0	0	0	0	1	0	0	0	0	0	0	0	0	0	0	0	2	0	0	0	1	0	0	0	0	0
7fd4a0b18296c0ba33b60214daa27a29_rep;size=41;	x__sub0.01	x__sub0.01	x__sub0.01	x__sub0.01	x__sub0.01	x__sub0.01	x__sub0.01	0	0	0	0	0	0	0	0	0	0	0	0	1	0	0	0	1	0	0	0	0	0	0	0	0	0	0	0	0	0	0	0	1	0	0	0	0	0	0	0	0	0
a2fabdc3c597bfbf6fabda371cefe534_rep;size=41;	x__sub0.01	x__sub0.01	x__sub0.01	x__sub0.01	x__sub0.01	x__sub0.01	x__sub0.01	0	0	0	0	2	0	0	0	0	0	0	0	0	0	0	0	0	0	0	0	0	0	0	0	0	0	0	0	0	0	0	0	2	0	0	0	0	0	0	0	0	0
1e8b9f1d00227f876a9695f4415ceefa_rep;size=41;	x__sub0.01	x__sub0.01	x__sub0.01	x__sub0.01	x__sub0.01	x__sub0.01	x__sub0.01	0	0	0	0	2	0	0	0	2	0	0	0	0	0	0	0	1	0	0	0	0	0	0	0	0	0	0	0	0	0	0	0	0	0	0	0	0	0	0	0	0	0
4141068d1655f592a4f492fd713bdde3_rep;size=41;	x__sub0.01	x__sub0.01	x__sub0.01	x__sub0.01	x__sub0.01	x__sub0.01	x__sub0.01	0	0	0	0	0	0	0	0	0	0	0	0	0	0	0	0	0	0	0	0	0	0	0	0	0	0	0	0	0	0	0	0	0	0	0	0	0	0	0	0	0	0
23a6d56b276d666021dfd73f6e1f986a_rep;size=41;	x__sub0.01	x__sub0.01	x__sub0.01	x__sub0.01	x__sub0.01	x__sub0.01	x__sub0.01	0	0	0	0	2	0	0	0	0	0	0	0	0	0	0	0	3	0	0	0	0	0	0	0	0	0	0	0	0	0	0	0	0	0	0	0	0	0	0	0	1	0
65acd40742a815d31986b646ca672073_rep;size=41;	x__sub0.01	x__sub0.01	x__sub0.01	x__sub0.01	x__sub0.01	x__sub0.01	x__sub0.01	1	0	0	0	0	0	0	0	8	0	0	0	0	0	0	0	0	0	0	0	0	1	0	0	0	0	0	0	1	0	0	0	0	0	0	0	0	1	0	0	0	0
bfa131416137cb4ac83922a4ff410fb6_rep;size=41;	x__sub0.01	x__sub0.01	x__sub0.01	x__sub0.01	x__sub0.01	x__sub0.01	x__sub0.01	0	0	0	0	0	0	0	0	0	0	0	0	0	0	0	0	0	0	0	0	0	0	0	0	0	0	0	0	0	0	0	0	0	0	0	0	0	0	0	0	0	0
6ef22cfa177f4cf1d7fb2f49d2fcedae_rep;size=41;	x__sub0.01	x__sub0.01	x__sub0.01	x__sub0.01	x__sub0.01	x__sub0.01	x__sub0.01	0	0	0	0	0	0	0	0	0	0	0	0	0	0	0	0	0	0	0	0	0	0	0	0	0	0	0	0	3	0	0	0	1	0	0	0	1	0	0	0	3	0
8186506075616f8f272d83f5f0edeed2_rep;size=41;	x__sub0.01	x__sub0.01	x__sub0.01	x__sub0.01	x__sub0.01	x__sub0.01	x__sub0.01	0	0	0	0	1	0	0	0	0	0	0	0	0	0	0	0	0	0	0	0	0	0	0	0	0	0	0	0	0	0	0	0	0	0	0	0	0	0	0	0	0	0
c013b75915e782a3bb89f27a51fe26de_rep;size=41;	x__sub0.01	x__sub0.01	x__sub0.01	x__sub0.01	x__sub0.01	x__sub0.01	x__sub0.01	0	0	1	1	0	0	0	0	0	0	0	0	0	1	0	0	0	0	0	0	0	0	0	0	0	0	0	1	0	0	0	1	0	0	0	0	0	0	0	0	0	0
3a49ea1e932124ca19cbd3f78f0fb56d_rep;size=41;	x__sub0.01	x__sub0.01	x__sub0.01	x__sub0.01	x__sub0.01	x__sub0.01	x__sub0.01	0	0	0	0	0	0	0	0	0	0	0	0	0	0	0	0	0	0	0	0	0	0	0	0	0	0	0	0	0	0	0	0	0	0	0	0	0	0	0	0	0	0
b2c298b4ea98fc739004fc3a6a894d07_rep;size=41;	x__sub0.01	x__sub0.01	x__sub0.01	x__sub0.01	x__sub0.01	x__sub0.01	x__sub0.01	0	0	0	0	0	0	0	0	0	0	0	0	0	0	0	0	0	0	0	0	2	0	0	0	0	0	0	0	1	0	0	0	0	0	0	0	0	0	0	0	0	0
0dbd2d5577500f47a1f37e5eac296f16_rep;size=41;	x__sub0.01	x__sub0.01	x__sub0.01	x__sub0.01	x__sub0.01	x__sub0.01	x__sub0.01	0	0	0	0	0	0	0	0	0	0	0	0	0	0	0	0	0	0	0	0	0	0	0	0	0	0	0	0	0	0	0	0	0	0	0	0	0	0	0	0	0	0
cfbf0e8ffd4299e72a80d7d55b3ae055_rep;size=41;	x__sub0.01	x__sub0.01	x__sub0.01	x__sub0.01	x__sub0.01	x__sub0.01	x__sub0.01	0	0	0	1	0	1	0	0	0	0	0	0	0	0	3	1	0	1	1	1	0	1	0	0	0	1	2	3	0	0	3	1	0	0	2	1	0	0	0	4	0	0
1a9ca6ba49c11a0be04c28046bf5684f_rep;size=41;	x__sub0.01	x__sub0.01	x__sub0.01	x__sub0.01	x__sub0.01	x__sub0.01	x__sub0.01	0	0	0	0	0	0	0	1	0	0	0	0	0	0	0	1	0	0	0	0	0	0	0	0	0	0	1	4	0	0	0	1	0	0	0	1	0	0	0	1	0	0
a92f8aacb39e73d41c8b173f1321b3a5_rep;size=41;	x__sub0.01	x__sub0.01	x__sub0.01	x__sub0.01	x__sub0.01	x__sub0.01	x__sub0.01	0	0	0	0	0	0	0	0	0	0	0	0	0	0	0	1	0	0	0	0	0	0	1	0	0	0	0	4	0	0	0	1	0	0	1	0	0	0	0	0	0	0
d743928b246ffda1792947ca37e57e09_rep;size=41;	x__sub0.01	x__sub0.01	x__sub0.01	x__sub0.01	x__sub0.01	x__sub0.01	x__sub0.01	0	0	0	2	0	0	0	1	1	0	0	0	0	2	2	2	1	1	3	2	0	0	1	0	1	0	0	0	0	0	0	0	0	0	0	0	0	0	0	0	1	0
509995069cd407760cbabe41f1a80d95_rep;size=41;	x__sub0.01	x__sub0.01	x__sub0.01	x__sub0.01	x__sub0.01	x__sub0.01	x__sub0.01	0	0	0	0	0	0	0	0	0	0	1	0	0	1	0	0	0	0	0	0	0	0	0	3	0	0	1	4	0	0	0	3	0	0	1	2	0	0	2	9	0	0
0ad6a0dfb390e569ec7f9dd0f87df1de_rep;size=40;	x__sub0.01	x__sub0.01	x__sub0.01	x__sub0.01	x__sub0.01	x__sub0.01	x__sub0.01	1	0	0	0	0	0	0	0	0	0	0	0	1	0	0	0	0	0	0	0	0	0	0	0	0	0	0	0	0	0	0	0	0	0	0	0	0	0	0	0	0	0
37d30ac699fcb6162da7530c01e7c321_rep;size=40;	x__sub0.01	x__sub0.01	x__sub0.01	x__sub0.01	x__sub0.01	x__sub0.01	x__sub0.01	0	0	0	0	0	0	0	0	0	0	0	0	3	0	0	0	2	0	0	0	1	0	0	0	0	0	0	0	2	0	0	0	0	0	0	0	0	0	0	0	0	0
e5ef64a8e508e0bc4be59586c9d3c5f2_rep;size=40;	x__sub0.01	x__sub0.01	x__sub0.01	x__sub0.01	x__sub0.01	x__sub0.01	x__sub0.01	0	0	0	0	0	0	0	0	0	0	0	0	0	0	0	0	0	0	0	0	0	0	0	0	0	0	0	0	0	0	0	0	0	0	0	0	0	0	0	0	0	0
39862db1f05d2c8ddf6226aac7c32e35_rep;size=40;	x__sub0.01	x__sub0.01	x__sub0.01	x__sub0.01	x__sub0.01	x__sub0.01	x__sub0.01	0	0	0	0	0	0	0	0	0	0	0	0	0	0	0	0	0	0	0	0	0	0	0	0	0	0	0	0	0	0	0	0	0	0	0	0	0	0	0	0	0	0
4d09d81de9018f3921a778604b822fe3_rep;size=40;	x__sub0.01	x__sub0.01	x__sub0.01	x__sub0.01	x__sub0.01	x__sub0.01	x__sub0.01	0	0	0	0	0	0	0	1	0	0	0	0	0	0	1	2	0	0	0	5	0	0	1	0	0	0	3	2	0	0	0	2	0	3	0	1	0	0	0	2	0	0
808009a6d7fc881dcb32ff85ead300ef_rep;size=40;	x__sub0.01	x__sub0.01	x__sub0.01	x__sub0.01	x__sub0.01	x__sub0.01	x__sub0.01	1	0	0	0	1	0	0	0	0	0	0	0	0	0	0	0	0	0	0	0	3	0	0	0	1	0	0	0	2	0	0	0	0	0	0	0	0	0	0	0	2	0
ad1528714e93dd1c0be5e642acda918f_rep;size=40;	x__sub0.01	x__sub0.01	x__sub0.01	x__sub0.01	x__sub0.01	x__sub0.01	x__sub0.01	0	0	0	0	0	0	0	0	0	0	0	0	0	0	0	0	0	0	0	0	0	0	0	0	0	0	0	0	0	0	0	0	0	0	0	0	0	0	0	0	0	0
c14c92e34d685ff57df0aca8d1079486_rep;size=40;	x__sub0.01	x__sub0.01	x__sub0.01	x__sub0.01	x__sub0.01	x__sub0.01	x__sub0.01	0	0	0	0	0	0	0	0	0	0	0	0	0	0	0	0	0	0	0	0	1	0	0	0	0	0	0	0	0	0	0	0	0	0	0	0	0	0	0	0	0	0
e7651e976e33352ce83bd0f51548838f_rep;size=40;	x__sub0.01	x__sub0.01	x__sub0.01	x__sub0.01	x__sub0.01	x__sub0.01	x__sub0.01	0	0	0	0	0	0	0	0	0	0	0	0	0	0	0	0	0	0	0	0	0	0	0	0	0	0	0	0	0	0	0	0	0	0	0	0	0	0	0	0	0	0
5a05e4ee22ca4a91e3378fef86960091_rep;size=40;	x__sub0.01	x__sub0.01	x__sub0.01	x__sub0.01	x__sub0.01	x__sub0.01	x__sub0.01	0	0	0	0	0	0	0	0	1	0	0	0	3	0	0	0	0	0	0	0	8	0	0	0	0	0	0	0	0	0	0	0	0	0	0	0	0	0	0	0	4	0
c82d0b78c96873e223971abc3e83644a_rep;size=40;	x__sub0.01	x__sub0.01	x__sub0.01	x__sub0.01	x__sub0.01	x__sub0.01	x__sub0.01	0	0	0	0	0	0	0	0	0	0	0	0	0	0	0	1	0	0	0	0	0	0	1	1	0	2	1	5	0	3	0	0	0	2	2	3	0	1	0	4	0	0
7c9de362f2fd12e71a64eb4ec6131a09_rep;size=40;	x__sub0.01	x__sub0.01	x__sub0.01	x__sub0.01	x__sub0.01	x__sub0.01	x__sub0.01	0	0	0	0	0	0	0	0	0	0	0	0	0	0	0	0	0	0	0	0	0	0	0	0	0	0	0	0	0	0	0	0	0	0	0	0	0	0	0	0	0	0
6b90c5035d7ec338067032f86e556448_rep;size=40;	x__sub0.01	x__sub0.01	x__sub0.01	x__sub0.01	x__sub0.01	x__sub0.01	x__sub0.01	0	0	0	0	0	0	0	0	0	0	1	0	0	0	0	0	0	0	0	0	0	0	0	0	0	0	0	0	0	0	0	0	0	0	0	0	0	0	0	0	0	0
7bd76758a21d0b4e8eed63c6f7f1a419_rep;size=40;	x__sub0.01	x__sub0.01	x__sub0.01	x__sub0.01	x__sub0.01	x__sub0.01	x__sub0.01	0	0	0	0	0	0	0	0	0	0	0	0	0	0	0	0	0	0	0	0	0	0	0	0	0	0	0	0	0	0	0	0	0	0	0	0	0	0	0	0	0	0
4a9af5bda1a76edd57514682a24a50e0_rep;size=40;	x__sub0.01	x__sub0.01	x__sub0.01	x__sub0.01	x__sub0.01	x__sub0.01	x__sub0.01	0	0	0	0	0	0	0	0	0	0	0	0	0	0	0	0	0	0	0	0	0	0	0	0	0	0	0	0	0	0	0	0	0	0	0	0	0	0	0	0	0	0
d205056a52afd0fc9c131902dc8765e6_rep;size=39;	x__sub0.01	x__sub0.01	x__sub0.01	x__sub0.01	x__sub0.01	x__sub0.01	x__sub0.01	0	0	0	0	0	0	0	0	0	0	0	0	0	0	0	0	0	0	0	0	0	0	0	0	0	0	0	0	0	0	0	0	0	0	0	0	0	0	0	0	0	0
732b51a6596131e1305e3e59cff587c7_rep;size=39;	x__sub0.01	x__sub0.01	x__sub0.01	x__sub0.01	x__sub0.01	x__sub0.01	x__sub0.01	0	0	0	0	0	0	0	0	0	0	0	0	0	0	0	0	0	0	0	0	0	0	0	0	0	0	0	0	0	0	0	0	0	0	0	0	0	0	0	0	1	0
3f561cdf48750e7c49560ab13175784d_rep;size=39;	x__sub0.01	x__sub0.01	x__sub0.01	x__sub0.01	x__sub0.01	x__sub0.01	x__sub0.01	0	0	0	0	0	0	0	0	0	0	0	0	0	0	0	0	1	0	0	0	2	0	0	0	0	0	0	0	0	0	0	0	0	0	0	0	0	0	0	0	3	0
5f108f475d747bf1343001410d1ce400_rep;size=39;	x__sub0.01	x__sub0.01	x__sub0.01	x__sub0.01	x__sub0.01	x__sub0.01	x__sub0.01	0	0	0	0	1	0	0	0	0	0	0	0	23	0	0	0	2	0	0	0	0	0	0	0	1	0	0	0	0	0	0	0	0	0	0	0	1	0	0	0	0	0
7c229d0c860aadc10110d004f08565ac_rep;size=39;	x__sub0.01	x__sub0.01	x__sub0.01	x__sub0.01	x__sub0.01	x__sub0.01	x__sub0.01	0	0	0	0	0	0	0	0	0	0	0	0	0	0	0	0	0	0	0	0	0	0	0	0	0	0	0	0	0	0	0	0	0	0	0	0	0	0	0	0	0	0
7e702c58b6d3bd0f8050f74f3ecf07d0_rep;size=39;	x__sub0.01	x__sub0.01	x__sub0.01	x__sub0.01	x__sub0.01	x__sub0.01	x__sub0.01	0	0	0	0	0	0	0	0	0	0	0	0	2	0	0	0	0	0	0	0	3	0	0	0	0	0	0	0	0	0	0	0	0	0	0	0	0	0	0	0	0	0
cdd33bc652274d2866bff4292e54dfdd_rep;size=39;	x__sub0.01	x__sub0.01	x__sub0.01	x__sub0.01	x__sub0.01	x__sub0.01	x__sub0.01	0	0	0	0	0	0	0	0	0	0	0	0	0	0	0	0	0	0	0	0	0	0	0	0	0	0	0	0	0	0	0	0	0	0	0	0	0	0	0	0	0	0
e6170c0d2754115fbb4424ddb22830c5_rep;size=39;	x__sub0.01	x__sub0.01	x__sub0.01	x__sub0.01	x__sub0.01	x__sub0.01	x__sub0.01	0	0	0	0	0	0	0	0	0	0	1	0	0	0	0	0	0	0	0	0	0	0	0	0	0	0	0	0	0	0	0	0	0	0	0	0	0	0	0	0	0	0
1028f274ee6348df76e6ee59e94eaf43_rep;size=39;	x__sub0.01	x__sub0.01	x__sub0.01	x__sub0.01	x__sub0.01	x__sub0.01	x__sub0.01	0	0	0	0	0	0	0	0	0	0	0	0	0	0	0	0	0	0	0	0	0	0	0	0	0	0	0	0	0	0	0	0	0	0	0	0	0	0	0	0	0	0
6fb8c32b011084acbd7e03bb6e558105_rep;size=39;	x__sub0.01	x__sub0.01	x__sub0.01	x__sub0.01	x__sub0.01	x__sub0.01	x__sub0.01	0	0	0	0	0	0	0	0	0	0	0	0	11	0	0	0	5	0	0	0	0	0	0	0	0	0	0	0	0	0	0	0	0	0	0	0	0	0	0	0	0	0
6d56c3c70ee2891764d9f29ec4a815a1_rep;size=39;	x__sub0.01	x__sub0.01	x__sub0.01	x__sub0.01	x__sub0.01	x__sub0.01	x__sub0.01	0	0	0	0	0	0	0	0	0	0	0	0	0	0	0	0	0	0	0	0	0	0	0	0	0	0	0	0	0	0	0	0	0	0	0	0	0	0	0	0	0	0
72410ef0f176180f34e46e854e293694_rep;size=39;	x__sub0.01	x__sub0.01	x__sub0.01	x__sub0.01	x__sub0.01	x__sub0.01	x__sub0.01	0	0	0	1	0	0	0	0	0	0	0	0	0	0	0	0	0	0	0	0	0	0	0	0	0	0	0	0	0	0	0	0	0	0	0	0	0	0	0	0	0	0
fef38e8d03a8a91f945eb2fd2b24ba53_rep;size=39;	x__sub0.01	x__sub0.01	x__sub0.01	x__sub0.01	x__sub0.01	x__sub0.01	x__sub0.01	0	0	0	0	2	0	0	0	0	0	0	0	0	0	0	0	0	0	0	0	0	0	0	0	0	0	0	0	0	0	0	0	0	0	0	0	0	0	0	0	0	0
0a780a930b18281ab8ba2729b02696df_rep;size=39;	x__sub0.01	x__sub0.01	x__sub0.01	x__sub0.01	x__sub0.01	x__sub0.01	x__sub0.01	0	0	0	0	0	0	0	0	0	0	0	0	0	0	0	0	0	0	0	0	0	0	0	0	0	0	0	0	0	0	0	0	0	0	0	0	0	0	0	0	0	0
8236af9a28ae1273ff6de185decd5371_rep;size=39;	x__sub0.01	x__sub0.01	x__sub0.01	x__sub0.01	x__sub0.01	x__sub0.01	x__sub0.01	2	0	0	0	0	0	0	0	3	0	0	0	0	0	0	0	0	0	0	0	6	0	0	0	2	0	0	0	0	0	0	0	0	0	0	0	0	0	0	0	0	0
40734812da59a168789af39f81651b73_rep;size=39;	x__sub0.01	x__sub0.01	x__sub0.01	x__sub0.01	x__sub0.01	x__sub0.01	x__sub0.01	0	0	0	0	0	0	0	0	0	0	0	0	0	0	0	0	0	0	0	0	0	0	0	0	0	0	0	0	0	0	0	0	0	0	0	0	0	0	0	0	0	0
192d08c36eaa91f7a4394256647d5894_rep;size=39;	x__sub0.01	x__sub0.01	x__sub0.01	x__sub0.01	x__sub0.01	x__sub0.01	x__sub0.01	0	0	0	0	0	0	0	0	0	0	0	0	0	0	0	0	0	0	0	0	0	0	0	0	0	0	0	0	1	0	0	0	0	0	0	0	0	0	0	0	0	0
f9b47eb597c33768058c52ff93e3d4b4_rep;size=39;	x__sub0.01	x__sub0.01	x__sub0.01	x__sub0.01	x__sub0.01	x__sub0.01	x__sub0.01	0	0	0	0	0	0	0	0	0	0	0	0	0	0	0	0	0	0	0	0	0	0	0	0	0	0	0	0	0	0	0	0	0	0	0	0	0	0	0	0	6	0
7e5b59c30c7cb9156249757301d5f0d3_rep;size=39;	x__sub0.01	x__sub0.01	x__sub0.01	x__sub0.01	x__sub0.01	x__sub0.01	x__sub0.01	0	0	0	0	0	0	0	0	0	0	0	0	0	0	0	0	0	0	0	0	3	0	0	0	0	0	0	0	1	0	0	0	0	0	0	0	6	0	0	0	0	0
3979327414597bf28413fb404c20c943_rep;size=39;	x__sub0.01	x__sub0.01	x__sub0.01	x__sub0.01	x__sub0.01	x__sub0.01	x__sub0.01	0	0	0	0	0	0	0	0	0	0	0	0	0	0	0	0	0	0	0	0	0	0	0	0	0	0	0	0	0	0	0	0	0	0	0	0	0	0	0	0	0	0
761f99acff5b32b789051e66e094edcb_rep;size=38;	x__sub0.01	x__sub0.01	x__sub0.01	x__sub0.01	x__sub0.01	x__sub0.01	x__sub0.01	0	0	0	0	0	0	0	0	0	0	0	0	1	0	0	0	0	0	0	0	0	0	0	0	0	0	0	0	0	0	0	0	0	0	0	0	1	0	0	0	2	0
76dbf433d80e4d116102bc847fc218dd_rep;size=38;	x__sub0.01	x__sub0.01	x__sub0.01	x__sub0.01	x__sub0.01	x__sub0.01	x__sub0.01	0	0	0	0	0	0	0	0	0	0	0	0	0	0	0	0	0	0	0	0	0	0	0	0	0	0	0	0	0	0	0	0	0	0	0	0	0	0	0	0	0	0
b7fee9a2b1aefc505cdc2de68715b4f8_rep;size=38;	x__sub0.01	x__sub0.01	x__sub0.01	x__sub0.01	x__sub0.01	x__sub0.01	x__sub0.01	0	0	0	0	0	0	0	0	0	0	0	0	0	0	0	0	0	0	0	0	0	0	0	0	0	0	0	0	0	0	0	0	0	0	0	0	0	0	0	0	0	0
ca42e4e288b114a1d5a3141f09db840d_rep;size=38;	x__sub0.01	x__sub0.01	x__sub0.01	x__sub0.01	x__sub0.01	x__sub0.01	x__sub0.01	0	0	0	0	0	0	0	0	1	0	0	0	1	0	0	0	5	0	0	0	1	0	0	0	1	0	0	0	0	0	0	0	1	0	0	0	0	0	0	0	0	0
e9dbe10ed558ebae6cd9239ec03cf6d2_rep;size=38;	x__sub0.01	x__sub0.01	x__sub0.01	x__sub0.01	x__sub0.01	x__sub0.01	x__sub0.01	0	0	0	0	1	0	0	0	0	0	0	0	0	0	0	0	0	0	0	0	0	0	0	0	0	0	0	0	0	0	0	0	1	0	0	0	0	0	0	0	0	0
aaea620ba98a892eb308cfa41f510f52_rep;size=38;	x__sub0.01	x__sub0.01	x__sub0.01	x__sub0.01	x__sub0.01	x__sub0.01	x__sub0.01	0	0	0	0	7	0	0	0	0	0	0	0	5	0	0	0	0	0	0	0	0	0	0	0	2	0	0	0	1	0	0	0	0	0	0	0	1	0	0	0	1	0
e637c16027eaca66dc4d50762e99968d_rep;size=38;	x__sub0.01	x__sub0.01	x__sub0.01	x__sub0.01	x__sub0.01	x__sub0.01	x__sub0.01	0	0	0	0	0	0	0	0	0	0	0	0	0	0	0	0	0	0	0	0	0	0	0	0	0	0	0	0	0	0	0	0	0	0	0	0	0	0	0	0	0	0
494d43660307196152df7245d717756e_rep;size=38;	x__sub0.01	x__sub0.01	x__sub0.01	x__sub0.01	x__sub0.01	x__sub0.01	x__sub0.01	0	0	0	0	0	0	0	0	0	0	0	0	0	0	0	0	0	0	0	0	0	0	0	0	0	0	0	0	35	0	0	0	0	0	0	0	0	0	1	0	0	0
5193d334e2170a9109315a68021485a8_rep;size=38;	x__sub0.01	x__sub0.01	x__sub0.01	x__sub0.01	x__sub0.01	x__sub0.01	x__sub0.01	0	0	0	0	0	0	0	0	1	0	0	0	0	0	0	0	0	0	0	0	0	0	0	0	0	0	0	0	0	0	0	0	1	0	0	0	0	0	0	0	0	0
78886bfb03372344be697b374a67ab76_rep;size=38;	x__sub0.01	x__sub0.01	x__sub0.01	x__sub0.01	x__sub0.01	x__sub0.01	x__sub0.01	0	0	0	0	0	0	0	0	0	0	0	0	2	0	0	0	0	0	0	0	0	0	0	0	0	0	0	0	0	0	0	0	0	0	0	0	0	0	0	0	1	0
e655a710173b81e05c33f610c5307bce_rep;size=38;	x__sub0.01	x__sub0.01	x__sub0.01	x__sub0.01	x__sub0.01	x__sub0.01	x__sub0.01	0	0	0	0	0	0	0	0	0	0	0	2	0	0	0	0	0	0	0	0	0	0	0	0	0	0	0	0	0	0	0	1	0	0	0	0	0	0	0	0	0	0
12227762f49c6b1e90a039b106c5a663_rep;size=38;	x__sub0.01	x__sub0.01	x__sub0.01	x__sub0.01	x__sub0.01	x__sub0.01	x__sub0.01	3	0	0	0	0	0	0	0	0	0	0	0	0	0	0	0	0	0	0	0	2	0	0	0	0	0	0	0	0	0	0	0	0	0	0	0	0	0	0	0	0	0
45503b3defaf71a2f646975446efe176_rep;size=38;	x__sub0.01	x__sub0.01	x__sub0.01	x__sub0.01	x__sub0.01	x__sub0.01	x__sub0.01	0	0	0	0	0	0	0	0	2	0	0	0	1	0	0	0	0	0	0	0	0	0	0	0	2	0	0	0	0	0	0	0	0	0	0	0	0	0	0	0	1	0
ce6746d7b01e1ddf98e4b57efac27930_rep;size=38;	x__sub0.01	x__sub0.01	x__sub0.01	x__sub0.01	x__sub0.01	x__sub0.01	x__sub0.01	2	0	0	0	2	0	0	0	0	0	0	0	0	0	0	0	0	0	0	0	3	0	0	0	1	0	0	0	8	0	0	0	0	0	0	0	1	0	0	0	0	0
fb5cf75acdcc2792c79e7b3833d4b834_rep;size=38;	x__sub0.01	x__sub0.01	x__sub0.01	x__sub0.01	x__sub0.01	x__sub0.01	x__sub0.01	0	0	0	0	0	0	0	0	0	0	0	0	0	0	0	0	0	0	0	0	0	0	0	0	0	0	0	0	0	0	0	0	0	0	0	0	0	0	0	0	0	0
49146ffc088124e5ef128b889dfb63f6_rep;size=38;	x__sub0.01	x__sub0.01	x__sub0.01	x__sub0.01	x__sub0.01	x__sub0.01	x__sub0.01	0	0	0	0	1	0	0	0	1	0	0	0	4	0	0	0	0	0	0	0	2	0	2	0	1	0	0	0	3	0	0	0	0	0	0	0	3	0	0	0	0	0
ff563321e0a70fa49652249bdfb0bd6c_rep;size=38;	x__sub0.01	x__sub0.01	x__sub0.01	x__sub0.01	x__sub0.01	x__sub0.01	x__sub0.01	0	0	0	0	0	0	0	0	0	0	0	0	0	0	0	0	0	0	0	0	0	0	0	0	0	0	0	1	0	0	0	0	0	0	0	0	0	0	0	0	0	0
7e5516618620cdd9eadb8d9e44535b7d_rep;size=38;	x__sub0.01	x__sub0.01	x__sub0.01	x__sub0.01	x__sub0.01	x__sub0.01	x__sub0.01	0	0	0	0	0	0	0	0	0	0	0	0	0	0	0	0	0	0	0	0	0	0	0	0	0	0	0	0	0	0	0	0	0	0	0	0	0	0	0	0	0	0
baf8e07fb7e5d45f591e8a24b5e96be3_rep;size=38;	x__sub0.01	x__sub0.01	x__sub0.01	x__sub0.01	x__sub0.01	x__sub0.01	x__sub0.01	0	0	0	0	0	0	0	0	0	0	0	0	0	0	0	0	2	0	0	0	0	0	0	0	0	0	0	0	0	0	0	0	0	0	0	0	0	0	0	0	16	0
b07dc68aeea1b7d57aae6d138c6931bc_rep;size=38;	x__sub0.01	x__sub0.01	x__sub0.01	x__sub0.01	x__sub0.01	x__sub0.01	x__sub0.01	0	0	0	0	0	0	0	0	0	0	0	0	0	0	0	0	0	0	0	0	0	0	0	0	0	0	0	0	0	0	0	0	0	0	0	0	0	0	0	0	0	0
adf3feacb0ff205385fa59401380fef1_rep;size=37;	x__sub0.01	x__sub0.01	x__sub0.01	x__sub0.01	x__sub0.01	x__sub0.01	x__sub0.01	0	0	0	0	0	0	0	0	0	0	0	0	0	0	0	0	0	0	0	0	0	0	0	0	0	0	0	0	0	0	0	0	0	0	0	0	0	0	0	0	0	0
256f948f883eda6ac878cd89aa146dce_rep;size=37;	x__sub0.01	x__sub0.01	x__sub0.01	x__sub0.01	x__sub0.01	x__sub0.01	x__sub0.01	0	0	0	0	0	0	0	0	0	0	0	0	1	0	0	0	2	0	0	0	0	0	0	0	0	0	0	0	0	0	0	0	0	0	0	0	0	0	0	0	0	0
085b112e3e03590868ec67a34b43d5a8_rep;size=37;	x__sub0.01	x__sub0.01	x__sub0.01	x__sub0.01	x__sub0.01	x__sub0.01	x__sub0.01	0	0	0	0	5	0	0	0	1	0	0	0	0	0	0	0	0	0	0	0	13	0	0	0	1	0	0	0	1	0	0	0	0	0	0	0	0	0	0	0	1	0
90aed2043fa619c50696e24ccbaf1d83_rep;size=37;	x__sub0.01	x__sub0.01	x__sub0.01	x__sub0.01	x__sub0.01	x__sub0.01	x__sub0.01	0	0	0	0	0	0	0	0	0	0	0	0	0	0	0	0	0	0	0	0	0	0	0	0	0	0	0	0	0	0	0	0	0	0	0	0	0	0	0	0	0	0
e1c22f6976d5cbb0ec365245f31839d6_rep;size=37;	x__sub0.01	x__sub0.01	x__sub0.01	x__sub0.01	x__sub0.01	x__sub0.01	x__sub0.01	0	0	0	0	0	0	0	0	0	0	0	0	0	0	1	0	0	0	0	0	2	0	0	1	0	0	0	0	0	0	0	0	0	0	0	0	0	0	0	1	0	0
516b12df3b302b330eb2804c0b4289c0_rep;size=37;	x__sub0.01	x__sub0.01	x__sub0.01	x__sub0.01	x__sub0.01	x__sub0.01	x__sub0.01	0	0	2	0	0	0	0	0	1	1	2	0	0	0	1	0	0	0	0	1	0	1	0	1	0	0	1	2	0	1	1	1	0	1	0	0	0	0	0	0	1	0
2455924eb8fc4b623bc0968b55eb4b50_rep;size=37;	x__sub0.01	x__sub0.01	x__sub0.01	x__sub0.01	x__sub0.01	x__sub0.01	x__sub0.01	0	0	0	0	0	0	0	0	0	0	0	0	0	0	0	0	0	0	0	0	0	0	0	1	0	0	0	0	0	0	0	0	0	0	0	0	0	0	0	0	0	0
7e36ad138d37db40d8c4acba867c41ed_rep;size=37;	x__sub0.01	x__sub0.01	x__sub0.01	x__sub0.01	x__sub0.01	x__sub0.01	x__sub0.01	5	0	0	0	0	0	0	0	0	0	0	0	0	0	0	0	0	0	0	0	0	0	0	0	0	0	0	0	0	0	0	0	0	0	0	0	0	0	0	0	14	0
d8c3e14a3229d0c7279cbf2d1ed12be8_rep;size=37;	x__sub0.01	x__sub0.01	x__sub0.01	x__sub0.01	x__sub0.01	x__sub0.01	x__sub0.01	0	0	0	0	0	0	0	0	0	0	0	0	0	0	0	0	0	0	0	0	1	0	0	0	0	0	0	0	0	0	0	0	0	0	0	0	0	0	0	0	0	0
8b63c2d26e46bc8c7659a10694ee68c2_rep;size=37;	x__sub0.01	x__sub0.01	x__sub0.01	x__sub0.01	x__sub0.01	x__sub0.01	x__sub0.01	0	0	0	0	0	2	0	1	0	0	0	0	0	0	0	0	0	0	0	0	0	0	0	1	0	0	0	1	0	0	0	0	0	0	0	0	0	0	0	2	0	0
4fb5d2059685eb77a75958a28c502edd_rep;size=37;	x__sub0.01	x__sub0.01	x__sub0.01	x__sub0.01	x__sub0.01	x__sub0.01	x__sub0.01	0	0	1	0	0	0	0	0	0	0	0	0	0	0	0	0	0	0	0	0	0	0	0	0	0	0	0	0	0	0	0	0	0	0	0	0	0	0	0	0	0	0
e7484d0271f3450a70706de795dd738f_rep;size=37;	x__sub0.01	x__sub0.01	x__sub0.01	x__sub0.01	x__sub0.01	x__sub0.01	x__sub0.01	0	0	0	2	0	1	0	0	1	1	1	0	0	2	3	0	0	0	0	1	1	0	2	1	0	0	2	1	0	0	0	0	0	0	1	0	0	1	1	1	0	1
00279e68c22e97afbf34fcbe0d6fad52_rep;size=37;	x__sub0.01	x__sub0.01	x__sub0.01	x__sub0.01	x__sub0.01	x__sub0.01	x__sub0.01	0	0	0	0	0	0	0	0	0	0	0	0	0	0	0	0	0	0	0	0	0	0	0	0	0	0	0	0	0	0	0	0	0	0	0	0	0	0	0	0	0	0
e51e0cfa9a204376df0fccd98726f08f_rep;size=37;	x__sub0.01	x__sub0.01	x__sub0.01	x__sub0.01	x__sub0.01	x__sub0.01	x__sub0.01	0	0	0	0	0	0	0	0	0	0	0	0	0	0	0	0	0	0	0	0	0	0	0	0	0	0	0	0	0	0	0	0	0	0	0	0	0	0	0	0	0	0
8e07cf6eb60dc068c0d431c309dd00bb_rep;size=37;	x__sub0.01	x__sub0.01	x__sub0.01	x__sub0.01	x__sub0.01	x__sub0.01	x__sub0.01	0	0	0	0	0	0	0	0	0	0	0	0	0	0	0	0	0	0	0	0	0	0	0	0	0	0	0	0	0	0	0	0	0	0	0	0	0	0	0	0	0	0
d90cb27d9176861918e6de2dc50728f5_rep;size=37;	x__sub0.01	x__sub0.01	x__sub0.01	x__sub0.01	x__sub0.01	x__sub0.01	x__sub0.01	0	1	1	0	0	0	0	0	0	0	0	0	0	0	2	1	0	0	0	1	0	0	0	0	0	0	1	2	0	2	1	1	0	0	1	0	0	0	3	2	0	1
deda32f901e3c4db2e6a51d4ed366671_rep;size=37;	x__sub0.01	x__sub0.01	x__sub0.01	x__sub0.01	x__sub0.01	x__sub0.01	x__sub0.01	0	1	0	0	0	0	0	1	0	0	0	0	0	0	0	0	0	0	0	1	0	0	2	2	0	0	0	4	0	1	0	0	0	0	0	2	0	0	0	2	0	0
55dc5085232a1697b6f90a3347697c46_rep;size=36;	x__sub0.01	x__sub0.01	x__sub0.01	x__sub0.01	x__sub0.01	x__sub0.01	x__sub0.01	0	0	0	0	0	0	0	0	0	0	0	0	0	0	0	0	0	0	0	0	0	0	0	0	2	0	0	0	0	0	0	0	0	0	0	0	0	0	0	0	0	0
e491f1cde7959785ff6168559bf78a43_rep;size=36;	x__sub0.01	x__sub0.01	x__sub0.01	x__sub0.01	x__sub0.01	x__sub0.01	x__sub0.01	0	0	0	0	0	0	0	0	0	0	0	0	0	0	0	0	0	0	0	0	0	0	0	0	0	0	0	0	0	0	0	0	0	0	0	0	0	0	0	0	0	0
3c6729e7ca6bca3f5fa1240ff1911477_rep;size=36;	x__sub0.01	x__sub0.01	x__sub0.01	x__sub0.01	x__sub0.01	x__sub0.01	x__sub0.01	2	0	0	0	0	0	0	0	0	0	0	0	0	0	0	0	0	0	0	0	0	0	0	0	1	0	0	0	1	0	0	0	0	0	0	0	5	0	0	0	0	0
ecb5b851d615237d131671ca79db0787_rep;size=36;	x__sub0.01	x__sub0.01	x__sub0.01	x__sub0.01	x__sub0.01	x__sub0.01	x__sub0.01	1	0	0	0	2	0	0	0	0	0	0	0	0	0	0	0	2	0	0	0	0	0	0	0	0	0	0	0	0	0	0	0	0	0	0	0	2	0	0	0	0	0
55ef06da438803a3c77aa094956cdd3d_rep;size=36;	x__sub0.01	x__sub0.01	x__sub0.01	x__sub0.01	x__sub0.01	x__sub0.01	x__sub0.01	0	0	0	0	0	0	0	0	0	0	0	0	0	0	0	0	0	0	0	0	0	0	0	0	0	0	0	0	0	0	0	0	0	0	0	0	0	0	0	0	0	0
ef673a2a75a7fcf503090d67e49899ad_rep;size=36;	x__sub0.01	x__sub0.01	x__sub0.01	x__sub0.01	x__sub0.01	x__sub0.01	x__sub0.01	0	0	0	0	0	0	0	0	0	0	0	0	0	0	0	0	0	0	0	0	0	0	0	0	0	0	0	0	0	0	0	0	0	0	0	0	0	0	0	0	0	0
85881323074c82d76b1a7a2d5e76738f_rep;size=36;	x__sub0.01	x__sub0.01	x__sub0.01	x__sub0.01	x__sub0.01	x__sub0.01	x__sub0.01	0	0	0	0	2	0	0	0	0	0	0	0	0	0	0	0	0	0	0	0	0	0	0	0	3	0	0	0	1	0	0	0	1	0	0	0	1	0	0	0	0	0
ae0d5585a75558d122d49ea43c33695a_rep;size=36;	x__sub0.01	x__sub0.01	x__sub0.01	x__sub0.01	x__sub0.01	x__sub0.01	x__sub0.01	0	0	0	0	0	0	0	0	0	0	0	0	0	0	0	0	0	0	0	0	0	0	0	0	0	0	0	0	0	0	0	0	0	0	0	0	0	0	0	0	0	0
ee3e4788ca3513c8858a1f4a614eb5a8_rep;size=36;	x__sub0.01	x__sub0.01	x__sub0.01	x__sub0.01	x__sub0.01	x__sub0.01	x__sub0.01	0	0	0	0	0	0	0	0	0	0	0	0	0	0	0	0	0	0	0	0	0	0	0	0	0	0	0	0	0	0	0	0	3	0	0	0	0	0	0	0	0	0
6839675c23ce5a67d3da70559135f4dc_rep;size=36;	x__sub0.01	x__sub0.01	x__sub0.01	x__sub0.01	x__sub0.01	x__sub0.01	x__sub0.01	0	0	0	1	0	0	0	0	0	0	0	0	0	1	0	0	0	0	0	0	0	0	0	0	0	0	3	5	0	2	1	1	0	0	2	1	0	0	2	4	0	1
ac753e4201e1831a1e696ab0183bd081_rep;size=36;	x__sub0.01	x__sub0.01	x__sub0.01	x__sub0.01	x__sub0.01	x__sub0.01	x__sub0.01	0	0	0	0	0	0	0	0	0	0	0	0	0	0	0	0	0	0	0	0	0	0	0	0	0	0	0	0	0	0	0	0	0	0	0	0	0	0	0	0	0	0
0cf247b2edaac510cb041a65a2444e22_rep;size=36;	x__sub0.01	x__sub0.01	x__sub0.01	x__sub0.01	x__sub0.01	x__sub0.01	x__sub0.01	0	0	0	0	0	0	0	0	0	0	0	0	0	0	0	0	0	0	0	0	0	0	0	0	0	0	0	0	0	0	0	0	0	0	0	0	0	0	0	0	0	0
3d304d1c4c8cce04147b672ade9e0a4d_rep;size=36;	x__sub0.01	x__sub0.01	x__sub0.01	x__sub0.01	x__sub0.01	x__sub0.01	x__sub0.01	0	0	0	0	0	0	0	0	0	0	0	0	0	0	0	0	11	0	0	0	1	0	0	0	1	0	0	0	8	0	0	0	1	0	0	0	0	0	0	0	0	0
355efa8e2cc40a817cedd22d8dd69df5_rep;size=36;	x__sub0.01	x__sub0.01	x__sub0.01	x__sub0.01	x__sub0.01	x__sub0.01	x__sub0.01	0	0	0	0	0	0	0	0	0	0	0	0	0	0	0	0	0	0	0	0	0	0	0	0	0	0	0	0	0	0	0	0	0	0	0	0	0	0	0	0	0	0
1bd622b3e56e39c44b051e205421eeba_rep;size=36;	x__sub0.01	x__sub0.01	x__sub0.01	x__sub0.01	x__sub0.01	x__sub0.01	x__sub0.01	0	0	0	1	0	0	0	0	0	0	0	0	0	0	0	0	0	0	0	0	0	0	0	0	0	0	0	0	0	0	0	0	0	0	0	0	0	0	0	0	0	0
e78982d29a46e552cd95eed39b3aea74_rep;size=36;	x__sub0.01	x__sub0.01	x__sub0.01	x__sub0.01	x__sub0.01	x__sub0.01	x__sub0.01	0	0	0	0	0	0	0	0	0	0	0	0	0	0	0	0	0	0	0	0	0	0	0	0	0	0	0	0	0	0	0	0	0	0	0	0	0	0	0	0	0	0
331299d7c57555f33e329630c494234e_rep;size=35;	x__sub0.01	x__sub0.01	x__sub0.01	x__sub0.01	x__sub0.01	x__sub0.01	x__sub0.01	1	0	0	0	0	0	0	0	0	0	0	0	0	0	0	0	0	0	0	0	0	0	0	0	0	0	0	0	0	0	0	0	0	0	0	0	0	0	0	0	0	0
705cd7acdf262a250b3cb426c4e4f347_rep;size=35;	x__sub0.01	x__sub0.01	x__sub0.01	x__sub0.01	x__sub0.01	x__sub0.01	x__sub0.01	0	0	0	0	0	0	0	0	0	0	0	0	0	0	0	0	0	0	0	0	0	0	0	0	0	0	0	0	0	0	0	0	0	0	0	0	0	0	0	0	0	0
74478552d0526d03585d32e99a126153_rep;size=35;	x__sub0.01	x__sub0.01	x__sub0.01	x__sub0.01	x__sub0.01	x__sub0.01	x__sub0.01	0	0	0	0	0	0	0	0	0	0	0	0	0	0	0	0	0	0	0	0	0	0	0	0	0	0	0	0	0	0	0	0	0	0	0	0	0	0	0	0	2	0
f7282f8be475ea245c0eff98606dce49_rep;size=35;	x__sub0.01	x__sub0.01	x__sub0.01	x__sub0.01	x__sub0.01	x__sub0.01	x__sub0.01	0	0	0	0	0	0	0	0	0	0	0	0	0	0	0	0	1	0	0	0	0	0	0	0	2	0	0	0	1	0	0	0	1	0	0	0	0	0	0	0	14	0
12fefc0215ccde98b4bad4c9d1ff858c_rep;size=35;	x__sub0.01	x__sub0.01	x__sub0.01	x__sub0.01	x__sub0.01	x__sub0.01	x__sub0.01	0	0	0	0	0	0	0	0	0	0	0	0	0	0	0	0	0	0	0	0	4	0	0	0	0	0	0	0	0	0	0	0	0	0	0	0	0	0	0	0	0	0
3f12cfdb7f8cb648c7bb157a96511441_rep;size=35;	x__sub0.01	x__sub0.01	x__sub0.01	x__sub0.01	x__sub0.01	x__sub0.01	x__sub0.01	0	0	0	0	0	0	0	0	4	0	0	0	1	0	0	0	4	0	0	0	1	0	0	0	0	0	0	0	2	0	0	0	0	0	0	0	0	0	0	0	0	0
a28013c750ce8fd48a4aeaa0766f62eb_rep;size=35;	x__sub0.01	x__sub0.01	x__sub0.01	x__sub0.01	x__sub0.01	x__sub0.01	x__sub0.01	0	0	0	0	0	0	0	0	0	0	1	0	0	0	0	0	0	0	0	0	0	0	0	0	0	0	0	1	0	0	0	0	0	0	1	0	0	0	0	0	0	0
313ed216443be53e92f0fb81dabeadaf_rep;size=35;	x__sub0.01	x__sub0.01	x__sub0.01	x__sub0.01	x__sub0.01	x__sub0.01	x__sub0.01	0	0	0	0	0	1	0	0	0	0	0	0	0	0	0	0	0	0	0	0	0	0	0	0	0	0	0	0	0	0	0	0	0	0	0	0	1	0	0	0	0	0
2f12e7fec0769ea55c64fdfa4bd258da_rep;size=35;	x__sub0.01	x__sub0.01	x__sub0.01	x__sub0.01	x__sub0.01	x__sub0.01	x__sub0.01	1	0	0	0	1	0	0	0	0	0	0	0	0	0	0	0	0	0	0	0	0	0	0	0	0	0	0	0	0	0	0	0	0	0	0	0	0	0	0	0	0	0
d6b6768b126f3436f51d7a6e29dcb3d6_rep;size=35;	x__sub0.01	x__sub0.01	x__sub0.01	x__sub0.01	x__sub0.01	x__sub0.01	x__sub0.01	0	0	0	0	0	0	0	0	0	0	0	0	0	0	0	0	0	0	0	0	0	0	0	0	0	0	0	0	0	0	0	0	0	0	0	0	0	0	0	0	0	0
0e4aa5d9fb98bb0b129336f31d1506d4_rep;size=35;	x__sub0.01	x__sub0.01	x__sub0.01	x__sub0.01	x__sub0.01	x__sub0.01	x__sub0.01	0	0	1	0	0	0	0	1	0	1	1	1	0	0	1	1	0	0	0	0	0	0	0	0	0	0	0	0	0	0	0	1	0	0	0	1	0	0	0	1	0	0
d30617e753ef3f3cec62ad399fd576d1_rep;size=35;	x__sub0.01	x__sub0.01	x__sub0.01	x__sub0.01	x__sub0.01	x__sub0.01	x__sub0.01	0	0	0	0	0	0	0	0	0	0	0	0	0	0	0	0	0	0	0	0	0	0	0	0	0	0	0	0	0	0	0	0	0	0	0	0	0	0	0	0	0	0
e10432e3333ef422e089ba03580370cc_rep;size=34;	x__sub0.01	x__sub0.01	x__sub0.01	x__sub0.01	x__sub0.01	x__sub0.01	x__sub0.01	0	0	0	0	0	0	0	0	0	0	0	0	0	0	0	0	0	0	0	0	0	0	0	0	0	0	0	0	0	0	0	0	0	0	0	0	0	0	0	0	0	0
8f5ad65e6b3ad21e20147441ef2403a6_rep;size=34;	x__sub0.01	x__sub0.01	x__sub0.01	x__sub0.01	x__sub0.01	x__sub0.01	x__sub0.01	1	0	0	0	1	0	0	0	0	0	0	0	0	0	0	0	0	0	0	0	2	0	0	0	0	0	0	0	0	0	0	0	1	0	0	0	2	0	0	0	0	0
978dc1896be795eae6b9fecba040b71d_rep;size=34;	x__sub0.01	x__sub0.01	x__sub0.01	x__sub0.01	x__sub0.01	x__sub0.01	x__sub0.01	0	0	0	0	1	0	0	0	0	0	0	0	1	0	0	0	7	0	0	0	0	0	0	0	0	0	0	0	4	0	0	0	3	0	0	0	0	0	0	0	0	0
31f1380fc240755a9c597f7a6988cec0_rep;size=34;	x__sub0.01	x__sub0.01	x__sub0.01	x__sub0.01	x__sub0.01	x__sub0.01	x__sub0.01	0	0	0	0	0	0	0	0	0	0	0	0	0	0	0	0	0	0	0	0	0	0	0	0	0	0	0	0	0	0	0	0	0	0	0	0	0	0	0	0	0	0
a6cb7f44ad8b2def52c0f61f8ecfe955_rep;size=34;	x__sub0.01	x__sub0.01	x__sub0.01	x__sub0.01	x__sub0.01	x__sub0.01	x__sub0.01	0	0	0	0	1	0	0	0	0	0	0	0	1	0	0	0	0	0	0	0	0	0	0	0	4	0	0	0	0	0	0	0	0	0	0	0	0	0	0	0	0	0
b1bf0e8eb62b0dbe4d62117c051f78ec_rep;size=34;	x__sub0.01	x__sub0.01	x__sub0.01	x__sub0.01	x__sub0.01	x__sub0.01	x__sub0.01	1	0	0	0	0	0	0	0	0	0	0	0	0	0	0	0	0	0	0	0	0	0	0	0	1	0	0	0	0	0	0	0	0	0	0	0	0	0	0	0	0	0
e9a760a9ca21f2949bc00d27b6e6f784_rep;size=34;	x__sub0.01	x__sub0.01	x__sub0.01	x__sub0.01	x__sub0.01	x__sub0.01	x__sub0.01	0	0	0	0	0	0	0	0	0	0	0	0	0	0	0	0	0	0	0	0	0	0	0	0	0	0	0	0	0	0	0	0	0	0	0	0	0	0	0	2	0	0
624733b5e06e6396eb44c536968635a8_rep;size=34;	x__sub0.01	x__sub0.01	x__sub0.01	x__sub0.01	x__sub0.01	x__sub0.01	x__sub0.01	0	0	0	0	0	0	0	0	0	0	0	0	0	0	0	0	0	0	0	0	0	0	0	0	2	0	0	0	0	0	0	0	0	0	0	0	1	0	0	0	0	0
cb5a86eac7420edb31db06dbabf8637a_rep;size=34;	x__sub0.01	x__sub0.01	x__sub0.01	x__sub0.01	x__sub0.01	x__sub0.01	x__sub0.01	0	0	0	0	0	0	0	0	0	0	0	0	0	0	0	0	0	0	0	0	0	0	0	0	0	0	0	0	0	0	0	0	0	0	0	0	0	0	0	0	0	0
e8afe5cc785aa3c2ca1e4a4f29f03616_rep;size=34;	x__sub0.01	x__sub0.01	x__sub0.01	x__sub0.01	x__sub0.01	x__sub0.01	x__sub0.01	0	0	0	0	0	0	0	1	0	0	0	3	0	0	0	0	0	0	0	0	0	0	0	2	0	0	0	0	0	0	0	3	0	0	0	0	0	0	0	0	0	0
20350ee4d2219e034ade7bb07cdf1290_rep;size=34;	x__sub0.01	x__sub0.01	x__sub0.01	x__sub0.01	x__sub0.01	x__sub0.01	x__sub0.01	0	0	0	0	0	0	0	0	0	0	0	0	0	0	0	0	0	0	0	0	0	0	0	0	0	0	0	0	0	0	0	0	0	0	0	0	0	0	0	0	0	0
1a75730819dbbef508299e4f766352e9_rep;size=34;	x__sub0.01	x__sub0.01	x__sub0.01	x__sub0.01	x__sub0.01	x__sub0.01	x__sub0.01	0	1	1	1	2	0	0	0	0	0	0	0	0	0	0	0	0	0	0	0	0	0	0	0	0	0	0	0	0	0	0	0	0	2	0	2	0	0	0	0	0	0
7fc4f0eef4f3ca4394f1c0b25c24f949_rep;size=34;	x__sub0.01	x__sub0.01	x__sub0.01	x__sub0.01	x__sub0.01	x__sub0.01	x__sub0.01	0	0	0	0	0	0	0	0	0	0	0	0	0	0	0	0	0	0	0	0	0	0	0	0	0	0	0	0	0	0	0	0	0	0	0	0	0	0	0	0	0	0
1e646812499ae266090b142f8908e736_rep;size=34;	x__sub0.01	x__sub0.01	x__sub0.01	x__sub0.01	x__sub0.01	x__sub0.01	x__sub0.01	0	0	0	0	0	0	0	0	0	0	0	0	0	0	0	0	0	0	0	0	0	0	0	0	0	0	0	1	0	0	0	0	0	0	0	0	0	0	0	0	0	0
c2514cffd0050b683fb505fe22c39e6a_rep;size=34;	x__sub0.01	x__sub0.01	x__sub0.01	x__sub0.01	x__sub0.01	x__sub0.01	x__sub0.01	0	0	1	1	0	0	0	0	0	0	0	1	0	0	0	1	0	0	0	0	0	0	0	1	0	0	1	0	0	0	0	0	0	0	0	0	0	0	0	2	0	0
c9a61981232f62ecc011a31dd934f3b2_rep;size=34;	x__sub0.01	x__sub0.01	x__sub0.01	x__sub0.01	x__sub0.01	x__sub0.01	x__sub0.01	0	0	0	0	0	0	0	0	0	0	0	0	0	0	0	0	0	0	0	0	0	0	0	0	0	0	0	0	0	0	0	0	0	0	0	0	0	0	0	0	0	0
98ab7d5323a91a24e5e2e57701af4748_rep;size=34;	x__sub0.01	x__sub0.01	x__sub0.01	x__sub0.01	x__sub0.01	x__sub0.01	x__sub0.01	0	0	0	0	0	0	0	0	0	0	0	0	0	0	0	0	0	0	0	0	0	0	0	0	0	0	0	0	0	0	0	1	0	0	0	0	0	0	0	0	0	0
e4920e42de7a20135c07abfea3d67365_rep;size=34;	x__sub0.01	x__sub0.01	x__sub0.01	x__sub0.01	x__sub0.01	x__sub0.01	x__sub0.01	0	0	1	0	0	0	0	0	0	0	0	0	0	0	1	0	0	1	0	1	0	0	2	0	0	1	1	5	0	0	2	2	0	0	1	0	0	0	1	3	0	0
4b74cda5bceb62aa9779cebb48f7e862_rep;size=34;	x__sub0.01	x__sub0.01	x__sub0.01	x__sub0.01	x__sub0.01	x__sub0.01	x__sub0.01	0	0	0	0	0	0	0	0	1	0	0	0	0	0	0	0	0	0	0	0	1	0	0	0	0	0	0	0	3	0	0	0	0	0	0	0	0	0	0	0	0	0
9da190a6517cde6080e12d16ea90ba86_rep;size=34;	x__sub0.01	x__sub0.01	x__sub0.01	x__sub0.01	x__sub0.01	x__sub0.01	x__sub0.01	0	0	0	0	0	0	2	1	0	1	0	0	0	1	0	1	0	0	0	0	0	0	3	0	0	1	1	3	0	1	0	4	0	1	1	1	0	0	0	4	0	0
ddd5f7b2330aa1e1f5edd2094a0d9fa2_rep;size=34;	x__sub0.01	x__sub0.01	x__sub0.01	x__sub0.01	x__sub0.01	x__sub0.01	x__sub0.01	0	0	0	0	0	0	0	0	0	0	0	0	0	0	0	0	0	0	0	0	0	0	0	0	0	0	0	0	0	0	0	0	0	0	0	0	0	0	0	0	0	0
88a1cfacc7736e4285750faa042db4fc_rep;size=33;	x__sub0.01	x__sub0.01	x__sub0.01	x__sub0.01	x__sub0.01	x__sub0.01	x__sub0.01	0	0	0	0	0	0	0	0	1	0	0	0	0	0	0	0	0	0	0	0	0	0	0	0	0	0	0	0	0	0	0	0	0	0	0	0	1	0	0	0	0	0
756e66a66ff00587d54faff550270cae_rep;size=33;	x__sub0.01	x__sub0.01	x__sub0.01	x__sub0.01	x__sub0.01	x__sub0.01	x__sub0.01	0	0	0	0	0	0	0	0	0	0	0	0	0	0	0	0	0	0	0	0	0	0	0	0	0	0	0	0	0	0	0	0	0	0	0	0	0	0	0	0	0	0
80e440901be4c1dcfcdd00e7174816c9_rep;size=33;	x__sub0.01	x__sub0.01	x__sub0.01	x__sub0.01	x__sub0.01	x__sub0.01	x__sub0.01	0	0	0	0	2	0	0	0	1	0	0	0	7	0	0	0	0	0	0	0	0	0	0	0	0	0	0	0	1	0	0	0	0	0	0	0	0	0	0	0	0	0
983a723972c0a9484e6b81c18f63775c_rep;size=33;	x__sub0.01	x__sub0.01	x__sub0.01	x__sub0.01	x__sub0.01	x__sub0.01	x__sub0.01	0	0	0	0	0	0	0	0	0	0	0	0	0	0	0	0	0	0	0	0	0	0	0	0	0	0	0	0	0	0	0	0	0	0	0	0	0	0	0	0	0	0
a10a78883bafdfd2771f3eabf200d422_rep;size=33;	x__sub0.01	x__sub0.01	x__sub0.01	x__sub0.01	x__sub0.01	x__sub0.01	x__sub0.01	0	0	0	0	0	0	0	0	0	0	0	0	0	0	0	0	0	0	0	0	0	0	0	0	0	0	0	0	0	0	0	0	0	0	0	0	0	0	0	0	0	0
012414acdaeb807da41a4e447737ac1b_rep;size=33;	x__sub0.01	x__sub0.01	x__sub0.01	x__sub0.01	x__sub0.01	x__sub0.01	x__sub0.01	0	0	0	0	0	0	0	0	0	0	0	0	1	0	0	0	2	0	0	0	0	0	0	0	0	0	0	0	0	0	0	0	0	0	0	0	5	0	0	0	0	0
496ab46672dd7d76d3d8f9685909b624_rep;size=33;	x__sub0.01	x__sub0.01	x__sub0.01	x__sub0.01	x__sub0.01	x__sub0.01	x__sub0.01	0	0	0	0	0	0	0	0	0	0	0	0	0	0	0	0	0	0	0	0	0	0	0	0	0	0	0	0	0	0	0	0	0	0	0	0	1	0	0	0	0	0
0ad94b081a3760c2d02f517633b1d8ca_rep;size=33;	x__sub0.01	x__sub0.01	x__sub0.01	x__sub0.01	x__sub0.01	x__sub0.01	x__sub0.01	0	0	0	0	0	0	0	0	0	0	0	0	0	0	0	0	0	0	0	0	0	0	0	0	0	0	0	0	0	0	0	0	1	0	0	0	0	0	0	0	0	0
1b9def1e10085f6747300594dbb974f2_rep;size=33;	x__sub0.01	x__sub0.01	x__sub0.01	x__sub0.01	x__sub0.01	x__sub0.01	x__sub0.01	0	0	0	1	0	1	1	0	0	1	0	1	0	0	1	1	0	0	0	0	0	0	0	0	0	0	0	0	0	0	0	0	0	0	0	1	0	0	0	2	0	0
4aa3c4854ea2b90d80bda1ad647c803f_rep;size=33;	x__sub0.01	x__sub0.01	x__sub0.01	x__sub0.01	x__sub0.01	x__sub0.01	x__sub0.01	0	0	0	0	0	0	0	0	1	0	0	0	0	0	0	0	0	0	0	0	0	0	0	0	1	0	0	0	0	0	0	0	0	0	0	0	1	0	0	0	0	0
7f1c0369f9678cf54460412b88fe72b2_rep;size=33;	x__sub0.01	x__sub0.01	x__sub0.01	x__sub0.01	x__sub0.01	x__sub0.01	x__sub0.01	0	0	0	0	0	0	0	0	0	0	0	0	0	0	0	0	0	0	0	0	0	0	0	0	0	0	0	0	0	0	0	0	0	0	0	0	0	0	0	0	0	0
884e608b00ee1d9ec0f06c3817adbf5f_rep;size=33;	x__sub0.01	x__sub0.01	x__sub0.01	x__sub0.01	x__sub0.01	x__sub0.01	x__sub0.01	3	0	0	0	3	0	0	0	0	0	0	0	1	0	0	0	0	0	0	0	0	0	0	0	0	0	0	0	2	0	0	0	0	0	0	0	0	0	0	0	0	0
749ce2888e18e28ca5a3a718f53e7a65_rep;size=33;	x__sub0.01	x__sub0.01	x__sub0.01	x__sub0.01	x__sub0.01	x__sub0.01	x__sub0.01	0	1	0	0	0	2	0	0	0	0	0	0	0	0	0	0	0	0	1	0	0	0	0	1	0	0	1	4	0	0	0	1	0	1	0	2	0	0	1	9	0	0
ac4bcad1bef3e86eaec680dcd2ddb258_rep;size=33;	x__sub0.01	x__sub0.01	x__sub0.01	x__sub0.01	x__sub0.01	x__sub0.01	x__sub0.01	0	0	0	0	0	0	0	0	1	0	0	0	0	0	0	0	0	0	0	0	0	0	0	0	0	0	0	0	0	0	0	0	0	0	0	0	2	0	0	0	0	0
5fad293669a01d7043a45adc2fc4403b_rep;size=33;	x__sub0.01	x__sub0.01	x__sub0.01	x__sub0.01	x__sub0.01	x__sub0.01	x__sub0.01	0	0	0	0	0	0	0	0	0	0	0	0	0	0	0	0	0	0	0	0	2	0	0	0	0	0	0	0	0	0	0	0	2	0	0	0	1	0	0	0	0	0
477bb780a64625c5fb169692e62d4d28_rep;size=33;	x__sub0.01	x__sub0.01	x__sub0.01	x__sub0.01	x__sub0.01	x__sub0.01	x__sub0.01	0	0	0	0	0	0	0	0	0	0	0	0	0	0	0	0	0	0	0	0	0	0	0	0	0	0	0	0	0	0	0	0	0	0	0	0	0	0	0	0	0	0
5132549afba21de6bda48ffb4045b099_rep;size=33;	x__sub0.01	x__sub0.01	x__sub0.01	x__sub0.01	x__sub0.01	x__sub0.01	x__sub0.01	0	0	0	0	0	0	0	0	0	0	0	0	0	0	0	0	0	0	0	0	0	0	0	0	0	0	0	0	0	0	0	0	0	0	0	0	0	0	0	0	0	0
f516d953e8f7c32359aa548a3e2c61c9_rep;size=33;	x__sub0.01	x__sub0.01	x__sub0.01	x__sub0.01	x__sub0.01	x__sub0.01	x__sub0.01	0	0	0	0	0	0	0	0	0	0	0	0	0	0	0	0	0	0	0	0	0	0	0	0	0	0	0	0	0	0	0	0	0	0	0	0	0	0	0	0	0	0
a5e6f6479fa232dea5cfd3610786c28c_rep;size=33;	x__sub0.01	x__sub0.01	x__sub0.01	x__sub0.01	x__sub0.01	x__sub0.01	x__sub0.01	0	0	0	0	0	0	0	0	0	0	0	0	0	0	0	0	0	0	0	0	0	0	0	0	0	0	0	0	0	0	0	1	0	0	0	0	0	0	0	0	0	0
72eb5f90fee9e4974164fe10da8f5d2d_rep;size=33;	x__sub0.01	x__sub0.01	x__sub0.01	x__sub0.01	x__sub0.01	x__sub0.01	x__sub0.01	0	0	0	0	0	0	0	0	0	0	0	0	0	0	0	0	0	0	0	0	0	0	0	0	0	0	0	0	0	0	0	0	0	0	0	0	0	0	0	0	0	0
57d25e7f7605ebb6607c2a7ea19262fa_rep;size=33;	x__sub0.01	x__sub0.01	x__sub0.01	x__sub0.01	x__sub0.01	x__sub0.01	x__sub0.01	0	0	0	0	0	0	0	0	0	0	0	0	0	0	0	0	0	0	0	0	0	0	0	0	0	0	0	0	0	0	0	0	0	0	0	0	0	0	0	0	0	0
721fc532ceba77e38690bf169f82865f_rep;size=33;	x__sub0.01	x__sub0.01	x__sub0.01	x__sub0.01	x__sub0.01	x__sub0.01	x__sub0.01	0	0	0	0	0	0	0	0	0	0	0	0	0	0	0	0	0	0	0	0	0	0	0	0	0	0	0	0	0	0	0	0	0	0	0	0	0	0	0	0	0	0
29653772ec10d43ace24f4aac0423f8a_rep;size=32;	x__sub0.01	x__sub0.01	x__sub0.01	x__sub0.01	x__sub0.01	x__sub0.01	x__sub0.01	0	0	0	0	0	0	0	0	0	0	0	0	0	0	0	0	0	0	0	0	0	0	0	0	0	0	0	0	0	0	0	0	0	0	0	0	0	0	0	0	32	0
80bc9429e4da5cfa235f56f48f56795b_rep;size=32;	x__sub0.01	x__sub0.01	x__sub0.01	x__sub0.01	x__sub0.01	x__sub0.01	x__sub0.01	0	0	0	0	0	0	0	0	0	0	0	0	0	0	0	0	0	0	0	0	0	0	0	0	0	0	0	0	0	0	0	0	0	0	0	0	0	0	0	0	0	0
f3f97a29787e15db8f8a9b62216f572d_rep;size=32;	x__sub0.01	x__sub0.01	x__sub0.01	x__sub0.01	x__sub0.01	x__sub0.01	x__sub0.01	0	0	0	0	0	0	0	0	0	0	0	0	0	0	0	0	1	0	0	0	0	0	0	0	0	0	0	0	0	0	0	0	0	0	0	0	0	0	0	0	0	0
9eacc6ee6010a6d615a6a73609e3b7fc_rep;size=32;	x__sub0.01	x__sub0.01	x__sub0.01	x__sub0.01	x__sub0.01	x__sub0.01	x__sub0.01	0	0	0	0	0	0	0	0	0	0	0	0	0	0	0	0	0	0	0	0	0	0	0	0	0	0	0	0	0	0	0	0	1	0	0	0	1	0	0	0	0	0
368c1ba5fd1f4041eaeacca278795ba7_rep;size=32;	x__sub0.01	x__sub0.01	x__sub0.01	x__sub0.01	x__sub0.01	x__sub0.01	x__sub0.01	0	0	0	0	0	0	0	0	0	0	0	0	0	0	0	0	0	0	0	0	0	0	0	0	0	0	0	0	0	0	0	0	1	0	0	0	0	0	0	0	0	0
09bde92a8bb80acbdb1052ced272352c_rep;size=32;	x__sub0.01	x__sub0.01	x__sub0.01	x__sub0.01	x__sub0.01	x__sub0.01	x__sub0.01	0	0	0	0	0	0	0	0	1	0	0	0	0	0	0	0	0	0	0	0	0	0	0	0	3	0	0	0	1	0	0	0	2	0	0	0	0	0	0	0	3	0
ff81039034d564d536e2fa81a7564b5e_rep;size=32;	x__sub0.01	x__sub0.01	x__sub0.01	x__sub0.01	x__sub0.01	x__sub0.01	x__sub0.01	0	0	0	0	0	0	0	0	0	0	0	0	0	0	0	0	0	0	0	0	0	0	0	0	0	0	0	0	0	0	0	0	0	0	0	0	0	0	0	0	0	0
6cfba91f4fbf356ec3062bef3b6337db_rep;size=32;	x__sub0.01	x__sub0.01	x__sub0.01	x__sub0.01	x__sub0.01	x__sub0.01	x__sub0.01	0	0	0	0	1	0	0	0	0	0	0	0	0	0	0	0	0	0	0	0	0	0	0	1	0	0	0	0	0	0	0	0	0	0	0	0	0	1	0	0	0	0
c439213d73b3a6de705708042e1409a8_rep;size=32;	x__sub0.01	x__sub0.01	x__sub0.01	x__sub0.01	x__sub0.01	x__sub0.01	x__sub0.01	0	0	0	0	0	0	0	0	0	0	0	0	0	0	0	0	0	0	0	0	0	0	0	0	0	0	0	0	0	0	0	0	0	0	2	0	0	0	0	0	0	0
477bb865ad88dddf2b4455aa95b22363_rep;size=32;	x__sub0.01	x__sub0.01	x__sub0.01	x__sub0.01	x__sub0.01	x__sub0.01	x__sub0.01	0	0	0	0	3	0	0	0	0	0	0	0	0	0	0	0	0	0	0	0	0	0	0	0	0	0	0	0	0	0	0	0	0	0	0	0	0	0	0	0	0	0
c18617e03ea441bc89a60fdd40f8bbad_rep;size=32;	x__sub0.01	x__sub0.01	x__sub0.01	x__sub0.01	x__sub0.01	x__sub0.01	x__sub0.01	0	0	0	0	0	0	0	0	0	0	0	0	0	0	0	0	0	0	0	0	0	0	0	0	0	0	0	0	0	0	0	0	0	0	0	0	0	0	0	0	0	0
d6ace2a43e628dd74078c29b3366670f_rep;size=32;	x__sub0.01	x__sub0.01	x__sub0.01	x__sub0.01	x__sub0.01	x__sub0.01	x__sub0.01	0	0	0	0	0	0	0	0	0	0	0	0	0	0	0	0	0	0	0	0	0	0	0	0	0	0	0	0	0	0	0	0	0	0	0	0	0	0	0	0	0	0
b885a1482574b1b4e4589aa752c7eaf7_rep;size=32;	x__sub0.01	x__sub0.01	x__sub0.01	x__sub0.01	x__sub0.01	x__sub0.01	x__sub0.01	0	0	0	0	0	0	0	0	0	0	0	0	1	0	0	0	25	0	0	0	0	0	0	0	0	0	0	0	0	0	0	0	0	0	0	0	0	0	0	0	0	0
1b298cfbb724b8bf0eb5a520ff8c9079_rep;size=32;	x__sub0.01	x__sub0.01	x__sub0.01	x__sub0.01	x__sub0.01	x__sub0.01	x__sub0.01	0	0	0	0	0	0	0	0	0	0	0	0	0	0	0	0	0	0	0	0	0	0	0	0	0	0	0	0	0	0	0	0	0	0	0	0	0	0	0	0	0	0
3f08d4a9c695e7d0450ae12f4e2d2c03_rep;size=32;	x__sub0.01	x__sub0.01	x__sub0.01	x__sub0.01	x__sub0.01	x__sub0.01	x__sub0.01	0	0	0	0	0	0	0	0	0	0	0	0	0	0	0	0	0	0	0	0	0	0	0	0	0	0	0	0	0	0	0	0	0	0	0	0	0	0	0	0	0	0
df32b09e31d6094e1c3cea7f90cf01f9_rep;size=32;	x__sub0.01	x__sub0.01	x__sub0.01	x__sub0.01	x__sub0.01	x__sub0.01	x__sub0.01	0	0	0	0	0	0	0	0	0	0	0	0	0	0	0	0	0	0	0	0	0	0	0	0	0	0	0	0	0	0	0	0	0	0	0	0	0	0	0	0	0	0
09ab9ddbbfb10d7dd1ba53e3e5cbd825_rep;size=32;	x__sub0.01	x__sub0.01	x__sub0.01	x__sub0.01	x__sub0.01	x__sub0.01	x__sub0.01	0	0	0	0	0	0	0	0	0	0	0	1	0	0	0	0	0	0	0	0	0	0	0	0	0	0	0	0	0	0	0	0	0	0	0	0	0	0	0	0	0	0
ea2ca35dccdb3f00707c4449dac66faf_rep;size=32;	x__sub0.01	x__sub0.01	x__sub0.01	x__sub0.01	x__sub0.01	x__sub0.01	x__sub0.01	0	0	0	0	0	0	0	0	0	0	0	0	0	0	0	0	0	0	0	1	0	0	0	0	0	0	0	0	0	0	0	0	0	0	0	0	0	0	0	0	0	0
f48bc6c33e6e4f22eb92537bb8e35ff9_rep;size=32;	x__sub0.01	x__sub0.01	x__sub0.01	x__sub0.01	x__sub0.01	x__sub0.01	x__sub0.01	0	0	0	0	0	0	0	0	0	0	0	0	0	0	0	0	2	0	0	0	1	0	0	0	0	0	0	0	1	0	0	0	0	0	0	0	0	0	0	0	0	0
4dcc37dbb5d8ca011be838fa46a5e919_rep;size=32;	x__sub0.01	x__sub0.01	x__sub0.01	x__sub0.01	x__sub0.01	x__sub0.01	x__sub0.01	0	0	0	0	0	0	0	0	0	0	0	0	0	0	0	0	0	0	0	0	0	0	0	0	0	0	0	0	0	0	0	0	0	0	0	0	0	0	0	0	0	0
5a7b495826dd3e8616bacd52cab6f053_rep;size=32;	x__sub0.01	x__sub0.01	x__sub0.01	x__sub0.01	x__sub0.01	x__sub0.01	x__sub0.01	0	0	0	0	0	0	0	0	0	0	0	0	0	0	0	0	0	0	0	0	0	0	0	0	0	0	0	0	0	0	0	0	0	0	0	0	0	0	0	0	0	0
7add8037f7e4846915419338776be467_rep;size=32;	x__sub0.01	x__sub0.01	x__sub0.01	x__sub0.01	x__sub0.01	x__sub0.01	x__sub0.01	0	1	1	0	0	2	1	0	0	1	0	0	0	2	1	1	0	0	0	1	0	0	0	1	0	0	0	0	0	0	2	0	0	0	1	1	0	0	1	2	0	0
e7631f5b0c336e519bc43bbab1a3ef0e_rep;size=32;	x__sub0.01	x__sub0.01	x__sub0.01	x__sub0.01	x__sub0.01	x__sub0.01	x__sub0.01	0	0	0	0	0	0	0	0	0	0	0	0	0	0	0	0	0	0	0	0	0	0	0	0	0	0	0	0	0	0	0	0	0	0	0	0	0	0	0	0	0	0
95853e52397ce4c92b9499565b140afc_rep;size=31;	x__sub0.01	x__sub0.01	x__sub0.01	x__sub0.01	x__sub0.01	x__sub0.01	x__sub0.01	0	0	0	0	0	0	0	0	0	0	0	0	1	0	0	0	0	0	0	0	0	0	0	0	0	0	0	0	1	0	0	0	0	0	0	0	0	0	0	0	2	0
d7d703fe52d6d7c5f555cccc72ac9349_rep;size=31;	x__sub0.01	x__sub0.01	x__sub0.01	x__sub0.01	x__sub0.01	x__sub0.01	x__sub0.01	1	0	0	0	0	0	0	0	0	0	0	0	0	0	0	0	0	0	0	0	1	0	0	0	0	0	0	0	0	0	0	0	0	0	0	0	0	0	0	0	0	0
f4e1050b39bd0219daea4124fe4282a2_rep;size=31;	x__sub0.01	x__sub0.01	x__sub0.01	x__sub0.01	x__sub0.01	x__sub0.01	x__sub0.01	3	0	0	0	0	0	0	0	0	0	0	0	0	0	0	0	0	0	0	0	0	0	0	0	0	0	0	0	0	0	0	0	0	0	0	0	0	0	0	0	0	0
2ff39882d678691fe4ba9729b2664c7d_rep;size=31;	x__sub0.01	x__sub0.01	x__sub0.01	x__sub0.01	x__sub0.01	x__sub0.01	x__sub0.01	1	1	0	0	0	0	0	0	0	0	0	0	0	0	0	1	1	0	0	0	0	0	0	0	0	0	0	0	0	0	0	0	0	0	0	0	4	0	0	0	0	0
6196e6393749062f7f3f21c85c4130bd_rep;size=31;	x__sub0.01	x__sub0.01	x__sub0.01	x__sub0.01	x__sub0.01	x__sub0.01	x__sub0.01	0	0	0	0	1	0	0	0	0	0	0	0	0	3	0	0	0	0	0	0	0	0	0	0	0	0	0	1	0	0	0	0	0	0	0	0	0	0	0	0	0	0
78e09dea77bd3ccea8bd8d43817e6199_rep;size=31;	x__sub0.01	x__sub0.01	x__sub0.01	x__sub0.01	x__sub0.01	x__sub0.01	x__sub0.01	0	0	0	0	0	0	0	0	0	0	0	0	4	0	0	0	0	0	0	0	0	0	0	0	0	0	0	0	0	0	0	0	0	0	0	0	0	0	0	0	1	0
c710696729b3832c10eab0207df7d1c7_rep;size=31;	x__sub0.01	x__sub0.01	x__sub0.01	x__sub0.01	x__sub0.01	x__sub0.01	x__sub0.01	0	0	0	0	0	0	0	0	0	0	0	0	8	0	0	0	0	0	0	0	0	0	0	0	1	0	0	0	7	0	0	0	12	0	0	0	0	0	0	0	0	0
0aad7f0bc9775f5e41d8a2284ad9ad15_rep;size=31;	x__sub0.01	x__sub0.01	x__sub0.01	x__sub0.01	x__sub0.01	x__sub0.01	x__sub0.01	0	0	0	0	0	0	0	0	0	0	0	0	0	0	0	0	0	0	0	0	0	0	0	0	0	0	0	0	1	0	0	0	0	0	0	0	0	0	0	0	0	0
6343495126b38e2341317b24b54d5069_rep;size=31;	x__sub0.01	x__sub0.01	x__sub0.01	x__sub0.01	x__sub0.01	x__sub0.01	x__sub0.01	0	0	0	0	0	0	0	0	0	0	0	0	0	0	0	0	0	0	0	0	1	0	0	0	0	0	0	0	0	0	0	0	0	0	0	0	0	0	0	0	0	0
a673081298e2ab800e96c5d02e670aea_rep;size=31;	x__sub0.01	x__sub0.01	x__sub0.01	x__sub0.01	x__sub0.01	x__sub0.01	x__sub0.01	5	0	0	0	0	0	0	0	0	0	0	0	1	0	0	0	0	0	0	0	0	0	0	0	0	0	0	0	2	0	0	0	0	0	0	0	1	0	0	0	0	0
efebe515176e94a775ec9ebeac02c8fe_rep;size=31;	x__sub0.01	x__sub0.01	x__sub0.01	x__sub0.01	x__sub0.01	x__sub0.01	x__sub0.01	0	0	0	0	0	0	0	0	0	0	0	0	0	0	0	0	2	0	0	0	0	0	0	0	2	0	0	0	0	0	0	0	1	0	0	0	0	0	0	0	2	0
c4c0c7e4a608794d0334e90a83648bee_rep;size=31;	x__sub0.01	x__sub0.01	x__sub0.01	x__sub0.01	x__sub0.01	x__sub0.01	x__sub0.01	0	0	0	0	0	0	0	0	0	0	0	0	0	0	0	0	0	0	0	0	0	0	0	0	0	0	0	0	0	0	0	0	0	0	0	0	0	0	0	0	0	0
cf1e0167769cd72ba9a702db325b1a31_rep;size=31;	x__sub0.01	x__sub0.01	x__sub0.01	x__sub0.01	x__sub0.01	x__sub0.01	x__sub0.01	0	0	0	0	4	0	0	0	2	1	0	0	0	0	0	0	0	0	0	0	0	0	0	0	0	0	0	0	0	0	0	0	0	0	0	0	0	0	0	0	0	0
5ba69c1182d36e8f61d4be1ce956fe5c_rep;size=31;	x__sub0.01	x__sub0.01	x__sub0.01	x__sub0.01	x__sub0.01	x__sub0.01	x__sub0.01	0	0	0	1	0	0	0	0	0	0	0	0	0	0	0	0	0	0	0	0	0	0	0	0	0	0	0	0	0	0	0	0	0	0	0	0	0	0	0	0	0	0
0bba949ef55a89b641f9ff85c4011da6_rep;size=31;	x__sub0.01	x__sub0.01	x__sub0.01	x__sub0.01	x__sub0.01	x__sub0.01	x__sub0.01	0	0	0	2	0	0	2	0	0	0	2	0	0	1	0	0	0	0	0	0	0	0	0	0	0	0	0	0	0	0	0	0	0	0	0	1	0	0	0	1	0	0
2bd797c631272489e5c66977761f5625_rep;size=31;	x__sub0.01	x__sub0.01	x__sub0.01	x__sub0.01	x__sub0.01	x__sub0.01	x__sub0.01	0	0	0	0	1	0	0	0	0	0	0	0	2	0	0	0	0	0	0	0	1	0	0	0	0	0	0	0	0	0	0	0	0	0	0	0	1	0	0	0	0	0
fc57ebff70ba8c4ce6144ec5b15309a2_rep;size=31;	x__sub0.01	x__sub0.01	x__sub0.01	x__sub0.01	x__sub0.01	x__sub0.01	x__sub0.01	0	0	1	0	0	0	0	0	0	0	0	0	0	1	2	0	0	1	0	1	0	1	1	0	0	0	0	1	0	0	1	0	0	0	0	0	1	0	0	0	1	0
fda3aa1a1df3098c108679bf829e5646_rep;size=31;	x__sub0.01	x__sub0.01	x__sub0.01	x__sub0.01	x__sub0.01	x__sub0.01	x__sub0.01	0	0	0	0	0	0	0	0	0	0	0	0	0	0	0	0	0	0	0	0	0	0	0	0	0	0	0	0	0	0	0	0	0	0	0	0	0	0	0	0	0	0
7ea9d31b6cf66b1d6e4009d5a97b6b19_rep;size=31;	x__sub0.01	x__sub0.01	x__sub0.01	x__sub0.01	x__sub0.01	x__sub0.01	x__sub0.01	0	0	0	0	0	0	0	0	0	0	0	0	3	0	0	0	0	0	0	0	0	0	0	0	3	0	0	0	0	0	0	0	0	0	0	0	0	0	0	0	0	0
e306f19a2c849ba313514b482d1af87f_rep;size=31;	x__sub0.01	x__sub0.01	x__sub0.01	x__sub0.01	x__sub0.01	x__sub0.01	x__sub0.01	0	0	0	0	0	0	0	0	0	0	0	0	0	0	0	0	0	0	0	0	0	0	0	0	0	0	0	0	0	0	0	0	0	0	0	0	0	0	0	0	0	0
1c036e3eea21d034f1f91cb7b07fb2c6_rep;size=31;	x__sub0.01	x__sub0.01	x__sub0.01	x__sub0.01	x__sub0.01	x__sub0.01	x__sub0.01	0	0	0	0	0	0	0	0	0	0	0	0	0	0	0	0	0	0	0	0	0	0	0	0	0	0	0	0	0	0	0	0	0	0	0	0	0	0	0	0	0	0
de2da65769a963df66c97be8789168d6_rep;size=31;	x__sub0.01	x__sub0.01	x__sub0.01	x__sub0.01	x__sub0.01	x__sub0.01	x__sub0.01	1	0	0	0	1	0	0	0	0	0	0	0	2	0	0	0	1	0	0	0	3	0	0	0	0	0	0	0	0	0	0	0	0	0	0	0	0	0	0	0	1	0
84a10ab07c365476dead8c9e13f06c9d_rep;size=31;	x__sub0.01	x__sub0.01	x__sub0.01	x__sub0.01	x__sub0.01	x__sub0.01	x__sub0.01	0	0	0	0	2	0	0	0	0	0	0	0	0	0	0	0	4	0	0	0	0	0	0	0	0	0	0	0	0	0	0	0	2	0	0	0	0	0	0	0	0	0
c71a1217306b58eefa6ea97afa5026c3_rep;size=31;	x__sub0.01	x__sub0.01	x__sub0.01	x__sub0.01	x__sub0.01	x__sub0.01	x__sub0.01	0	0	0	0	0	0	0	0	0	0	0	0	0	0	0	0	0	0	0	0	0	0	0	0	0	0	0	0	0	0	0	0	0	0	0	0	0	0	0	1	0	0
99562c59168d658f49edae92a0ce915a_rep;size=31;	x__sub0.01	x__sub0.01	x__sub0.01	x__sub0.01	x__sub0.01	x__sub0.01	x__sub0.01	1	0	0	0	0	0	0	0	3	0	0	0	0	0	0	0	2	0	0	0	1	0	0	0	1	0	0	0	1	0	0	0	1	0	0	0	4	0	0	0	0	0
351b6b9100f3bd31b3ba3948c176d299_rep;size=31;	x__sub0.01	x__sub0.01	x__sub0.01	x__sub0.01	x__sub0.01	x__sub0.01	x__sub0.01	0	0	0	0	0	0	0	0	0	0	0	0	0	0	0	0	0	0	0	0	0	0	0	0	0	0	0	0	0	0	0	0	0	0	0	0	0	0	0	0	0	0
3c272e339fb4ab9a89b80a8a2fd00a17_rep;size=31;	x__sub0.01	x__sub0.01	x__sub0.01	x__sub0.01	x__sub0.01	x__sub0.01	x__sub0.01	0	0	0	0	0	0	0	0	0	0	0	0	0	0	0	0	0	0	0	0	0	0	0	0	0	0	0	0	0	0	0	0	0	0	0	0	0	0	0	0	0	0
18ff4a059a5c38763c193b29ec0c72c5_rep;size=30;	x__sub0.01	x__sub0.01	x__sub0.01	x__sub0.01	x__sub0.01	x__sub0.01	x__sub0.01	3	0	0	0	0	0	0	0	0	0	0	0	5	0	0	0	0	0	0	0	1	0	0	0	1	0	0	0	0	0	0	0	0	0	0	0	2	0	0	0	4	0
c3e745bc7e97e63f92c16afbb57f1404_rep;size=30;	x__sub0.01	x__sub0.01	x__sub0.01	x__sub0.01	x__sub0.01	x__sub0.01	x__sub0.01	0	0	0	0	0	0	0	0	0	0	0	0	2	0	0	0	0	0	0	0	0	0	0	0	0	0	0	0	1	0	0	0	0	0	0	0	0	0	0	0	1	0
2dc6f5b65082fa5b5b171cf03ec6ff7a_rep;size=30;	x__sub0.01	x__sub0.01	x__sub0.01	x__sub0.01	x__sub0.01	x__sub0.01	x__sub0.01	0	0	0	0	0	0	0	0	3	0	0	0	0	0	0	0	2	0	0	0	0	0	0	0	0	0	0	0	0	0	0	0	0	0	0	0	3	0	0	0	0	0
37f9a7900f321c804423a569144ed426_rep;size=30;	x__sub0.01	x__sub0.01	x__sub0.01	x__sub0.01	x__sub0.01	x__sub0.01	x__sub0.01	0	0	0	0	0	0	0	0	0	0	0	0	0	0	0	0	0	0	0	0	0	0	0	0	0	0	0	0	0	0	0	0	0	0	0	0	0	0	0	0	0	0
9065db6cc2431ebc1fec614cf0d0af87_rep;size=30;	x__sub0.01	x__sub0.01	x__sub0.01	x__sub0.01	x__sub0.01	x__sub0.01	x__sub0.01	0	0	0	0	0	0	0	0	0	0	0	0	0	0	0	0	0	0	0	0	0	0	0	0	0	0	0	0	0	0	0	0	0	0	0	0	0	0	0	0	0	0
14de041fb9a0af5322ab810d247b51aa_rep;size=30;	x__sub0.01	x__sub0.01	x__sub0.01	x__sub0.01	x__sub0.01	x__sub0.01	x__sub0.01	0	0	0	0	0	0	0	0	0	0	0	0	0	0	0	0	0	0	0	0	1	0	0	0	0	0	0	0	0	0	0	0	0	0	0	0	0	0	0	0	0	0
2217dd67963ff4abc3f3fbaca79b7ac1_rep;size=30;	x__sub0.01	x__sub0.01	x__sub0.01	x__sub0.01	x__sub0.01	x__sub0.01	x__sub0.01	0	0	0	0	0	0	0	0	0	0	0	0	0	0	0	0	0	0	0	0	1	0	0	0	0	0	0	0	0	0	0	0	1	0	0	0	0	0	0	0	0	0
54cee29a3831f1e89c9436056d68a48d_rep;size=30;	x__sub0.01	x__sub0.01	x__sub0.01	x__sub0.01	x__sub0.01	x__sub0.01	x__sub0.01	0	0	0	0	0	0	0	0	0	0	0	0	0	0	0	0	0	0	0	0	0	0	0	0	0	0	0	0	0	0	0	0	0	0	0	0	0	0	0	0	0	0
1214c656f756fc4aaff8d0ced0bdbf93_rep;size=30;	x__sub0.01	x__sub0.01	x__sub0.01	x__sub0.01	x__sub0.01	x__sub0.01	x__sub0.01	1	0	0	0	0	0	0	0	0	0	0	0	0	0	0	0	0	0	0	0	0	0	0	0	0	0	0	0	0	0	0	0	0	0	0	0	0	0	0	0	1	0
c108424bc15b650c7b970b122109b00e_rep;size=30;	x__sub0.01	x__sub0.01	x__sub0.01	x__sub0.01	x__sub0.01	x__sub0.01	x__sub0.01	0	0	0	0	0	0	0	0	0	0	0	0	0	0	0	0	0	0	0	0	2	0	0	0	0	0	0	0	3	0	0	0	3	0	0	0	0	0	0	0	0	0
bf1e1e91dcd8c17a2affdfb7fe6cad35_rep;size=30;	x__sub0.01	x__sub0.01	x__sub0.01	x__sub0.01	x__sub0.01	x__sub0.01	x__sub0.01	0	0	0	0	0	0	0	0	0	0	0	0	0	0	0	0	0	0	0	0	0	0	0	0	0	0	0	0	0	0	0	0	0	0	0	0	0	0	0	0	0	0
c160a9cf4ee0306522822a403a235fe5_rep;size=30;	x__sub0.01	x__sub0.01	x__sub0.01	x__sub0.01	x__sub0.01	x__sub0.01	x__sub0.01	0	0	0	0	0	0	0	0	0	0	0	0	0	0	0	0	0	0	0	0	0	0	0	0	0	0	0	0	0	0	0	0	0	0	0	0	0	0	0	0	0	0
f6d6d2bc3f1b958a9ab66cb24776ca95_rep;size=30;	x__sub0.01	x__sub0.01	x__sub0.01	x__sub0.01	x__sub0.01	x__sub0.01	x__sub0.01	0	0	0	0	0	0	0	0	0	0	0	0	0	0	0	0	0	0	0	0	0	0	0	0	0	0	0	0	0	0	0	0	0	0	0	0	0	0	0	0	0	0
bcb81ab4e65a36fed5211750e73fda94_rep;size=30;	x__sub0.01	x__sub0.01	x__sub0.01	x__sub0.01	x__sub0.01	x__sub0.01	x__sub0.01	0	0	0	0	0	0	0	0	0	0	0	0	0	0	0	0	0	0	0	0	0	0	0	0	0	0	0	0	0	0	0	0	0	0	0	0	0	0	0	0	0	0
114fb5ef9ba9e7f57139862451a4bcc1_rep;size=30;	x__sub0.01	x__sub0.01	x__sub0.01	x__sub0.01	x__sub0.01	x__sub0.01	x__sub0.01	0	0	0	0	3	0	0	0	1	0	0	0	0	0	0	0	3	0	0	0	2	0	0	0	1	0	0	0	0	0	0	0	1	0	0	0	1	0	0	0	1	0
4c89d554b4c108fc642f39ab0b46027c_rep;size=30;	x__sub0.01	x__sub0.01	x__sub0.01	x__sub0.01	x__sub0.01	x__sub0.01	x__sub0.01	0	0	0	0	0	2	0	1	0	0	1	0	0	0	1	3	0	0	0	0	0	0	0	0	0	0	1	2	0	1	2	0	0	0	1	1	0	0	1	4	0	0
6664845ff60604a3d4483c80ec964115_rep;size=30;	x__sub0.01	x__sub0.01	x__sub0.01	x__sub0.01	x__sub0.01	x__sub0.01	x__sub0.01	0	0	0	0	0	0	0	0	0	0	0	0	0	0	0	0	0	0	0	0	0	0	0	0	0	0	0	0	0	0	0	0	0	0	0	0	0	0	0	0	0	0
72617366e1be5e8014b433a5cf6f6833_rep;size=30;	x__sub0.01	x__sub0.01	x__sub0.01	x__sub0.01	x__sub0.01	x__sub0.01	x__sub0.01	0	0	0	0	0	0	0	0	0	0	0	0	0	0	0	0	0	0	0	0	0	0	0	0	0	0	0	0	0	0	0	0	0	0	0	0	0	0	0	0	0	0
0f54500a71e3e165831af2da69b811f6_rep;size=29;	x__sub0.01	x__sub0.01	x__sub0.01	x__sub0.01	x__sub0.01	x__sub0.01	x__sub0.01	0	0	0	0	0	0	0	0	2	0	0	0	0	0	0	0	0	0	0	0	0	0	0	0	2	0	0	0	0	0	0	0	0	0	0	0	0	0	0	0	2	0
e76523fa8f636a00ddc81261d716cdbc_rep;size=29;	x__sub0.01	x__sub0.01	x__sub0.01	x__sub0.01	x__sub0.01	x__sub0.01	x__sub0.01	0	0	0	0	0	0	0	0	0	0	0	0	0	0	0	0	0	0	0	0	0	0	0	0	0	0	0	0	0	0	0	0	0	0	0	0	0	0	0	0	0	0
79e71270cf93dc167bc11e6534bb8c0a_rep;size=29;	x__sub0.01	x__sub0.01	x__sub0.01	x__sub0.01	x__sub0.01	x__sub0.01	x__sub0.01	1	0	0	0	1	0	0	0	2	0	0	0	0	0	0	0	0	0	0	0	0	0	0	0	1	0	0	0	1	0	0	0	2	0	0	0	4	0	0	0	0	0
ac8e3b4f596680e5cfba00ff47130d3c_rep;size=29;	x__sub0.01	x__sub0.01	x__sub0.01	x__sub0.01	x__sub0.01	x__sub0.01	x__sub0.01	0	0	0	0	0	0	0	0	0	0	0	0	0	0	0	0	0	0	0	0	0	0	0	0	0	0	0	0	0	0	0	0	0	0	0	0	0	0	0	0	0	0
e1355bd638992ef0be580b8515d22ebb_rep;size=29;	x__sub0.01	x__sub0.01	x__sub0.01	x__sub0.01	x__sub0.01	x__sub0.01	x__sub0.01	0	0	0	0	0	0	0	0	0	0	0	0	0	0	0	0	0	0	0	0	0	0	0	0	0	0	0	0	0	0	0	0	0	0	0	0	0	0	0	0	1	0
10685db10415404de48ea49dc401212e_rep;size=29;	x__sub0.01	x__sub0.01	x__sub0.01	x__sub0.01	x__sub0.01	x__sub0.01	x__sub0.01	0	0	0	0	0	0	0	0	1	0	0	0	0	0	0	0	1	0	0	0	0	0	0	0	0	0	0	0	0	0	0	0	1	0	0	0	0	0	0	0	0	0
798cd17fa5470d746bfbe073ef29e48d_rep;size=29;	x__sub0.01	x__sub0.01	x__sub0.01	x__sub0.01	x__sub0.01	x__sub0.01	x__sub0.01	0	0	0	0	0	0	0	0	0	0	0	0	0	0	0	0	0	0	0	0	0	0	0	0	0	0	0	0	0	0	0	0	2	0	0	0	0	0	0	0	0	0
7a141a276b2a6308e188d21acffe2967_rep;size=29;	x__sub0.01	x__sub0.01	x__sub0.01	x__sub0.01	x__sub0.01	x__sub0.01	x__sub0.01	0	0	0	0	0	0	1	0	1	0	0	0	1	1	0	0	0	0	0	3	1	0	0	1	0	0	2	0	0	0	1	0	1	0	0	0	0	0	0	0	2	0
46f622983a7aef05d7fd6cf3d99d8416_rep;size=29;	x__sub0.01	x__sub0.01	x__sub0.01	x__sub0.01	x__sub0.01	x__sub0.01	x__sub0.01	0	0	0	0	0	0	0	0	0	0	0	0	0	0	0	0	0	0	0	0	1	0	0	0	0	0	0	0	1	0	0	0	2	0	0	0	0	0	0	0	2	0
24bafa55927ed87cc16ac982556ab1f0_rep;size=29;	x__sub0.01	x__sub0.01	x__sub0.01	x__sub0.01	x__sub0.01	x__sub0.01	x__sub0.01	0	0	0	0	0	0	0	0	0	0	0	0	0	0	0	0	0	0	0	0	0	0	0	0	0	0	0	1	0	0	0	0	0	0	0	0	0	0	0	1	0	0
9f7575cb86db417a5b64c6562b954a38_rep;size=29;	x__sub0.01	x__sub0.01	x__sub0.01	x__sub0.01	x__sub0.01	x__sub0.01	x__sub0.01	0	0	0	0	0	0	0	0	0	0	0	0	0	0	0	0	0	0	0	0	0	0	0	0	0	0	0	1	0	0	0	1	0	1	0	0	0	0	0	0	0	0
897bfff4ba4ca8de2a48a8413ed3a475_rep;size=29;	x__sub0.01	x__sub0.01	x__sub0.01	x__sub0.01	x__sub0.01	x__sub0.01	x__sub0.01	0	0	0	0	0	0	0	0	1	0	0	0	1	0	0	0	0	0	0	0	0	0	0	0	0	0	0	0	0	0	0	0	10	0	0	0	0	0	0	0	1	0
3e4b44365782b4313069a4c3d82574d5_rep;size=29;	x__sub0.01	x__sub0.01	x__sub0.01	x__sub0.01	x__sub0.01	x__sub0.01	x__sub0.01	0	0	0	1	0	1	0	0	0	1	0	0	0	3	1	1	0	0	0	0	0	0	0	0	0	1	4	1	0	0	0	2	0	0	0	4	0	1	0	2	0	1
478e29025ef555192a31aaa6f9e674e6_rep;size=29;	x__sub0.01	x__sub0.01	x__sub0.01	x__sub0.01	x__sub0.01	x__sub0.01	x__sub0.01	0	0	0	0	0	0	0	0	0	0	0	0	0	0	0	1	0	0	0	1	0	0	0	0	0	0	0	0	0	0	0	0	0	0	0	0	0	0	1	2	0	0
93fbc31c546e2e67459315b53aca0124_rep;size=29;	x__sub0.01	x__sub0.01	x__sub0.01	x__sub0.01	x__sub0.01	x__sub0.01	x__sub0.01	0	0	0	0	0	0	1	0	0	0	0	0	0	0	0	0	0	0	0	0	0	0	0	0	0	0	0	0	0	0	0	0	0	0	0	0	0	0	0	0	0	0
982902f94c5adb20a771fcea3c7e2e7d_rep;size=29;	x__sub0.01	x__sub0.01	x__sub0.01	x__sub0.01	x__sub0.01	x__sub0.01	x__sub0.01	0	0	0	0	0	0	0	0	0	0	0	0	0	0	0	0	0	0	0	0	0	0	0	0	0	0	0	0	0	0	0	0	0	0	0	0	0	0	0	0	0	0
08f84d26f8d9a879eabf88a6643c03a1_rep;size=28;	x__sub0.01	x__sub0.01	x__sub0.01	x__sub0.01	x__sub0.01	x__sub0.01	x__sub0.01	0	0	0	0	0	0	0	0	0	0	0	0	0	0	0	0	0	0	0	0	0	0	0	0	0	0	0	0	0	0	0	0	0	0	0	0	0	0	0	0	0	0
a95e3c2045e4e55a03b711935657cbed_rep;size=28;	x__sub0.01	x__sub0.01	x__sub0.01	x__sub0.01	x__sub0.01	x__sub0.01	x__sub0.01	0	0	0	0	0	0	0	0	0	0	0	0	0	0	0	0	2	0	0	0	1	0	0	0	0	0	0	0	0	0	0	0	1	0	0	0	0	0	0	0	0	0
be49234d2952c83859ceae6bbe6baa6b_rep;size=28;	x__sub0.01	x__sub0.01	x__sub0.01	x__sub0.01	x__sub0.01	x__sub0.01	x__sub0.01	0	0	0	0	0	0	0	0	0	0	0	0	0	0	0	0	0	0	0	0	0	0	0	0	0	0	0	0	0	0	0	0	0	0	0	0	0	0	0	0	0	0
193b8bc220f1a781450acca8d912f88e_rep;size=28;	x__sub0.01	x__sub0.01	x__sub0.01	x__sub0.01	x__sub0.01	x__sub0.01	x__sub0.01	0	0	0	0	0	0	0	0	0	0	0	0	0	0	0	0	0	0	0	0	0	0	0	0	0	0	0	0	0	0	0	0	0	0	0	0	0	0	0	0	0	0
2c70585ac1200dc204576ef3a2ffda0d_rep;size=28;	x__sub0.01	x__sub0.01	x__sub0.01	x__sub0.01	x__sub0.01	x__sub0.01	x__sub0.01	0	0	0	0	0	0	0	0	0	0	0	0	1	0	0	0	0	0	0	0	1	0	0	0	0	0	0	0	0	0	0	0	0	0	0	0	0	0	0	0	0	0
c6f1db8b5314a388649a5f20bddad20a_rep;size=28;	x__sub0.01	x__sub0.01	x__sub0.01	x__sub0.01	x__sub0.01	x__sub0.01	x__sub0.01	0	0	0	0	0	0	0	0	0	0	0	0	0	0	0	0	0	0	0	0	0	0	0	0	0	0	0	0	0	0	0	0	0	0	0	0	0	0	0	0	0	0
bf9071619742eea82ec5e84126e620e8_rep;size=28;	x__sub0.01	x__sub0.01	x__sub0.01	x__sub0.01	x__sub0.01	x__sub0.01	x__sub0.01	0	0	0	0	2	0	0	0	1	0	0	0	1	0	0	0	1	0	0	0	0	0	0	0	0	0	0	0	0	0	0	0	1	0	0	0	0	0	0	0	2	0
7aee09d0dd373dc93c182fcd325218a9_rep;size=28;	x__sub0.01	x__sub0.01	x__sub0.01	x__sub0.01	x__sub0.01	x__sub0.01	x__sub0.01	0	0	0	0	0	0	0	0	0	0	0	0	0	0	0	0	0	0	0	0	16	0	0	0	0	0	0	0	0	0	0	0	0	0	0	0	0	0	0	0	0	0
e3ec3664d077685861d5e8f0dc1c98e6_rep;size=28;	x__sub0.01	x__sub0.01	x__sub0.01	x__sub0.01	x__sub0.01	x__sub0.01	x__sub0.01	0	0	0	0	0	0	0	0	0	0	0	0	0	0	0	0	0	0	0	0	0	0	0	0	0	0	0	0	0	0	0	0	0	0	0	0	0	0	0	0	0	0
2133ae356993c9abd1f6ff6ca22d3cb4_rep;size=28;	x__sub0.01	x__sub0.01	x__sub0.01	x__sub0.01	x__sub0.01	x__sub0.01	x__sub0.01	0	0	0	0	0	1	0	0	0	0	0	0	0	0	0	0	0	0	0	0	0	0	0	0	0	0	0	0	2	0	0	0	0	0	0	0	4	0	0	0	0	0
4aa2062105c11e2c962d2e989b1d4148_rep;size=28;	x__sub0.01	x__sub0.01	x__sub0.01	x__sub0.01	x__sub0.01	x__sub0.01	x__sub0.01	0	0	0	0	0	0	0	0	0	0	0	0	0	0	0	0	0	0	0	0	0	0	0	0	0	0	0	0	0	0	0	0	0	0	0	0	0	0	0	0	0	0
4e9e607516ac4e7d032c4291e726b0c7_rep;size=28;	x__sub0.01	x__sub0.01	x__sub0.01	x__sub0.01	x__sub0.01	x__sub0.01	x__sub0.01	0	0	0	0	0	0	0	0	0	0	0	0	0	0	0	0	0	0	0	0	0	0	0	0	0	0	0	0	0	0	0	0	0	0	0	0	0	0	0	0	0	0
71c64ab86e03c83f0b9235bfa73f4161_rep;size=28;	x__sub0.01	x__sub0.01	x__sub0.01	x__sub0.01	x__sub0.01	x__sub0.01	x__sub0.01	0	0	0	0	0	0	0	0	0	0	0	0	0	0	1	0	0	0	0	0	0	0	0	0	0	0	1	1	0	0	0	2	0	0	0	0	0	0	0	2	0	0
2606ce6c0c96893b00f0fdd42b55e751_rep;size=28;	x__sub0.01	x__sub0.01	x__sub0.01	x__sub0.01	x__sub0.01	x__sub0.01	x__sub0.01	0	0	0	0	0	0	0	0	0	0	0	0	0	0	0	0	0	0	0	0	0	0	0	0	0	0	0	0	0	0	0	0	0	0	0	0	2	0	0	0	0	0
c2d4ce74e97ef4ec41cc20829af3ce6e_rep;size=28;	x__sub0.01	x__sub0.01	x__sub0.01	x__sub0.01	x__sub0.01	x__sub0.01	x__sub0.01	0	0	0	0	0	0	0	0	0	0	0	0	0	0	0	0	0	0	0	0	0	0	0	0	0	0	0	0	0	0	0	0	0	0	0	0	0	0	0	0	0	0
d995fa7368909262f73a1c37c12b67af_rep;size=28;	x__sub0.01	x__sub0.01	x__sub0.01	x__sub0.01	x__sub0.01	x__sub0.01	x__sub0.01	0	0	0	0	0	0	0	0	0	0	0	0	0	0	0	0	0	0	0	0	0	0	0	0	0	0	0	0	0	0	0	0	0	0	0	0	0	0	0	0	0	0
27833d8f0df7c874854f6262e69c0737_rep;size=27;	x__sub0.01	x__sub0.01	x__sub0.01	x__sub0.01	x__sub0.01	x__sub0.01	x__sub0.01	0	0	0	0	3	0	0	0	2	0	0	0	0	0	0	0	0	0	0	0	0	0	0	0	0	0	0	0	0	0	0	0	0	0	0	0	0	0	0	0	0	0
7dca4023b1ee3655a737dc4c616ee773_rep;size=27;	x__sub0.01	x__sub0.01	x__sub0.01	x__sub0.01	x__sub0.01	x__sub0.01	x__sub0.01	0	0	0	0	1	0	0	0	0	0	0	0	0	0	0	0	0	0	0	0	0	0	0	0	0	0	0	0	0	0	0	0	0	0	0	0	0	0	0	0	1	0
35144e5259d38e0c5aa8d91824f00045_rep;size=27;	x__sub0.01	x__sub0.01	x__sub0.01	x__sub0.01	x__sub0.01	x__sub0.01	x__sub0.01	0	0	0	0	0	0	0	0	0	0	0	0	0	0	0	0	1	0	0	0	3	0	0	0	0	0	0	0	2	0	0	0	0	0	0	0	1	0	0	0	0	0
55ffa5f89003a0d6b01f0acca6624c9a_rep;size=27;	x__sub0.01	x__sub0.01	x__sub0.01	x__sub0.01	x__sub0.01	x__sub0.01	x__sub0.01	0	0	0	0	0	0	0	0	2	0	0	0	0	0	0	0	0	0	0	0	0	0	0	0	0	0	0	0	0	0	0	0	0	0	0	0	0	0	0	0	0	0
0912d49613f7909a4b20a464d4413ccb_rep;size=27;	x__sub0.01	x__sub0.01	x__sub0.01	x__sub0.01	x__sub0.01	x__sub0.01	x__sub0.01	0	0	0	0	0	0	0	0	0	0	0	0	0	0	0	0	0	0	0	0	0	0	0	0	0	0	0	0	0	0	0	0	0	0	0	0	0	0	0	0	2	0
3069db163184c3dc8192da67f129f5a1_rep;size=27;	x__sub0.01	x__sub0.01	x__sub0.01	x__sub0.01	x__sub0.01	x__sub0.01	x__sub0.01	0	0	1	2	0	0	0	0	0	0	0	0	0	1	0	0	0	1	0	0	0	0	0	0	0	2	2	1	0	0	1	2	0	2	0	1	0	0	1	4	0	0
a4663bf4526e9024e2a4c541183394dc_rep;size=27;	x__sub0.01	x__sub0.01	x__sub0.01	x__sub0.01	x__sub0.01	x__sub0.01	x__sub0.01	0	0	0	0	0	0	0	0	0	0	0	0	0	0	0	0	0	0	0	0	2	0	0	0	0	0	0	0	0	0	0	0	0	0	0	0	0	0	0	0	2	0
b30175bf07b7ef89ef03dd7c431ba7d0_rep;size=27;	x__sub0.01	x__sub0.01	x__sub0.01	x__sub0.01	x__sub0.01	x__sub0.01	x__sub0.01	0	0	0	0	0	0	0	0	0	0	0	0	0	0	0	0	0	0	0	0	0	0	0	0	0	0	0	0	0	0	0	0	0	0	0	0	0	0	0	0	0	0
47702ab0455dba4023a94519470fe02c_rep;size=27;	x__sub0.01	x__sub0.01	x__sub0.01	x__sub0.01	x__sub0.01	x__sub0.01	x__sub0.01	0	0	0	0	2	0	0	0	1	0	0	0	0	0	0	0	0	0	0	0	0	0	0	0	0	0	0	0	1	0	0	0	1	0	0	0	0	0	0	0	1	0
8ab2ee4513450f763648bd4fd18434a9_rep;size=27;	x__sub0.01	x__sub0.01	x__sub0.01	x__sub0.01	x__sub0.01	x__sub0.01	x__sub0.01	0	0	0	0	0	0	1	0	0	0	0	0	0	0	0	0	0	0	0	0	0	0	0	0	0	0	0	0	0	0	0	0	0	1	0	0	0	0	0	0	0	0
298a9d13085655b678a94e8cabc892b1_rep;size=27;	x__sub0.01	x__sub0.01	x__sub0.01	x__sub0.01	x__sub0.01	x__sub0.01	x__sub0.01	0	0	0	0	0	0	0	0	0	0	0	0	0	0	0	0	0	0	0	0	0	0	0	0	0	0	0	0	0	0	0	0	0	0	0	0	0	0	0	0	0	0
9498126c829853dd89d5498c3fd11152_rep;size=27;	x__sub0.01	x__sub0.01	x__sub0.01	x__sub0.01	x__sub0.01	x__sub0.01	x__sub0.01	0	0	0	0	0	0	0	0	0	0	0	1	0	0	1	3	0	0	0	3	0	0	0	0	0	0	0	1	0	0	0	0	0	1	0	0	0	0	1	1	0	0
7bf2f9af5fc7744980d49df6d55ed3dc_rep;size=27;	x__sub0.01	x__sub0.01	x__sub0.01	x__sub0.01	x__sub0.01	x__sub0.01	x__sub0.01	0	0	0	0	0	1	0	0	0	0	0	0	0	0	0	0	0	0	0	0	0	0	0	0	0	0	0	0	0	0	0	0	0	0	0	0	0	0	0	0	0	0
49541fd46e9f469c5949ce2b7e8814d9_rep;size=27;	x__sub0.01	x__sub0.01	x__sub0.01	x__sub0.01	x__sub0.01	x__sub0.01	x__sub0.01	0	0	0	0	0	0	0	0	27	0	0	0	0	0	0	0	0	0	0	0	0	0	0	0	0	0	0	0	0	0	0	0	0	0	0	0	0	0	0	0	0	0
9abaaaf516caf3bda3352160070f99b1_rep;size=27;	x__sub0.01	x__sub0.01	x__sub0.01	x__sub0.01	x__sub0.01	x__sub0.01	x__sub0.01	0	0	0	0	0	0	0	0	0	0	0	0	0	0	0	0	2	0	0	0	0	0	0	0	0	0	0	0	0	0	0	0	0	0	0	0	2	0	0	0	0	0
2279458bf711a5666e218a17ddc581f1_rep;size=27;	x__sub0.01	x__sub0.01	x__sub0.01	x__sub0.01	x__sub0.01	x__sub0.01	x__sub0.01	0	0	0	2	0	1	1	0	0	0	0	1	0	1	0	0	0	0	1	0	1	0	1	2	0	0	0	3	0	0	0	1	0	0	0	0	0	0	1	1	0	0
a6cf9716992ff50c956c32f7b669027c_rep;size=27;	x__sub0.01	x__sub0.01	x__sub0.01	x__sub0.01	x__sub0.01	x__sub0.01	x__sub0.01	0	0	0	0	1	0	0	0	0	0	0	0	1	0	0	0	0	0	0	0	0	0	0	0	0	0	0	0	0	0	0	0	1	0	0	0	20	0	0	0	0	0
e3e1335efc2c3638d01297c3e9b106d2_rep;size=27;	x__sub0.01	x__sub0.01	x__sub0.01	x__sub0.01	x__sub0.01	x__sub0.01	x__sub0.01	0	0	0	0	0	0	0	0	0	0	0	0	0	0	0	0	1	0	0	0	0	0	0	0	1	0	0	0	0	0	0	0	2	0	0	0	0	0	0	0	0	0
e8df15385f363fc05bb2475d79f5100c_rep;size=27;	x__sub0.01	x__sub0.01	x__sub0.01	x__sub0.01	x__sub0.01	x__sub0.01	x__sub0.01	0	0	0	0	0	0	0	0	0	0	0	0	0	0	0	0	0	0	0	0	0	0	0	0	0	0	0	0	0	0	0	0	0	0	0	0	0	0	0	0	0	0
0293cfab19bbc843a1b5bac57e9a447f_rep;size=27;	x__sub0.01	x__sub0.01	x__sub0.01	x__sub0.01	x__sub0.01	x__sub0.01	x__sub0.01	0	3	0	0	0	1	1	0	0	1	0	0	0	1	0	1	1	1	1	3	0	0	0	0	0	0	0	0	0	0	0	0	0	1	0	0	1	0	1	0	0	0
bfa16ed0d413001f761d199a0cd93ef7_rep;size=27;	x__sub0.01	x__sub0.01	x__sub0.01	x__sub0.01	x__sub0.01	x__sub0.01	x__sub0.01	0	0	0	0	0	0	0	0	0	0	0	0	1	0	0	0	0	0	0	0	0	0	0	0	0	0	0	0	0	0	0	0	0	0	0	0	0	0	0	0	0	0
fef381300f438e83a53b5325e64a014f_rep;size=27;	x__sub0.01	x__sub0.01	x__sub0.01	x__sub0.01	x__sub0.01	x__sub0.01	x__sub0.01	0	0	0	0	2	0	0	0	0	0	0	0	1	0	0	0	0	0	0	0	0	0	0	0	5	0	0	0	1	0	0	0	0	0	0	0	0	0	0	0	0	0
2fa86c81f7fc7697c08f42fa21963a74_rep;size=27;	x__sub0.01	x__sub0.01	x__sub0.01	x__sub0.01	x__sub0.01	x__sub0.01	x__sub0.01	0	0	0	0	0	0	0	0	0	0	0	0	0	0	0	0	0	0	0	0	0	0	0	0	0	0	0	0	1	0	0	0	0	0	0	0	0	0	0	0	0	0
b79d4677befd0bcc9a6144b1c86ed1ff_rep;size=27;	x__sub0.01	x__sub0.01	x__sub0.01	x__sub0.01	x__sub0.01	x__sub0.01	x__sub0.01	0	0	0	0	0	0	0	0	0	0	0	0	0	0	0	0	0	0	0	0	0	0	0	0	0	0	0	0	0	0	0	0	0	0	0	0	0	0	0	0	0	0
fd2b146ae5b8d70ac746fff1de4cfb3e_rep;size=27;	x__sub0.01	x__sub0.01	x__sub0.01	x__sub0.01	x__sub0.01	x__sub0.01	x__sub0.01	0	0	0	0	0	0	0	0	0	0	0	0	0	0	0	0	0	0	0	0	0	0	0	0	0	0	0	0	0	0	0	0	0	0	0	0	0	0	0	0	0	0
38b23bb43522c0ac9ce562ca48fb9d68_rep;size=27;	x__sub0.01	x__sub0.01	x__sub0.01	x__sub0.01	x__sub0.01	x__sub0.01	x__sub0.01	0	0	0	0	0	0	0	0	0	0	1	0	0	0	0	0	0	0	0	0	0	0	0	0	0	0	0	0	0	0	0	0	0	0	1	0	0	0	0	0	0	0
b59f54d681074ff0e3c154a716fd1884_rep;size=27;	x__sub0.01	x__sub0.01	x__sub0.01	x__sub0.01	x__sub0.01	x__sub0.01	x__sub0.01	0	0	0	0	0	0	0	0	0	0	0	0	0	0	0	0	0	0	0	0	0	0	0	0	0	0	0	0	0	0	0	0	0	0	0	0	0	0	0	0	0	0
bc8c12c38fcf04adda9e1b0655d89c22_rep;size=26;	x__sub0.01	x__sub0.01	x__sub0.01	x__sub0.01	x__sub0.01	x__sub0.01	x__sub0.01	0	0	0	0	3	0	0	0	0	0	0	0	0	0	0	1	0	0	0	0	0	0	0	0	0	0	0	0	1	0	0	0	0	0	0	0	0	0	0	0	0	0
f2e4435dcf5f86c2c26a8b176735adc2_rep;size=26;	x__sub0.01	x__sub0.01	x__sub0.01	x__sub0.01	x__sub0.01	x__sub0.01	x__sub0.01	0	0	0	0	0	0	0	0	0	0	0	0	0	0	0	0	0	0	0	0	0	0	0	0	0	0	0	0	0	0	0	0	0	0	0	0	0	0	0	0	0	0
1e6841bc0f1ad0bc3453194b9468a99e_rep;size=26;	x__sub0.01	x__sub0.01	x__sub0.01	x__sub0.01	x__sub0.01	x__sub0.01	x__sub0.01	0	0	0	0	0	1	0	0	0	0	0	0	0	0	0	0	0	0	0	0	0	0	0	0	0	0	1	1	0	0	0	1	0	0	0	0	0	0	0	0	0	0
c7f132a277f6cdea8392bcefef0598fc_rep;size=26;	x__sub0.01	x__sub0.01	x__sub0.01	x__sub0.01	x__sub0.01	x__sub0.01	x__sub0.01	1	0	0	0	3	0	0	0	0	0	0	0	0	0	0	0	0	0	0	0	0	0	0	0	0	0	0	0	5	0	0	0	0	0	0	0	0	0	0	0	0	0
e2dae9003b22382953aa23454ca12a7d_rep;size=26;	x__sub0.01	x__sub0.01	x__sub0.01	x__sub0.01	x__sub0.01	x__sub0.01	x__sub0.01	0	0	0	0	0	0	0	0	0	0	0	0	0	0	0	0	0	0	0	0	0	0	0	0	0	0	0	0	0	0	0	0	0	0	0	0	0	0	0	0	0	0
f76d2936be712b3c1c0c8d2cd0d66b3a_rep;size=26;	x__sub0.01	x__sub0.01	x__sub0.01	x__sub0.01	x__sub0.01	x__sub0.01	x__sub0.01	1	0	0	0	2	0	0	0	0	0	0	0	8	0	0	0	0	0	0	0	1	0	0	0	0	0	0	0	0	0	0	0	0	0	0	0	0	0	0	0	0	0
a12d6870dfcd474623aa2d25ff4d8a18_rep;size=26;	x__sub0.01	x__sub0.01	x__sub0.01	x__sub0.01	x__sub0.01	x__sub0.01	x__sub0.01	0	0	0	0	0	0	0	0	0	0	0	0	1	0	0	0	0	0	0	0	0	0	0	0	0	0	0	0	0	0	0	0	0	0	0	0	0	0	0	0	1	0
70c722cf0d268d3e8f9282fade7ff3ed_rep;size=26;	x__sub0.01	x__sub0.01	x__sub0.01	x__sub0.01	x__sub0.01	x__sub0.01	x__sub0.01	0	0	0	0	0	0	0	0	0	0	0	0	0	0	0	0	0	0	0	0	0	0	0	0	0	0	0	0	0	0	0	0	0	0	0	0	0	0	0	0	0	0
503becbb0d4e99f7b6c6483fd6d2d465_rep;size=26;	x__sub0.01	x__sub0.01	x__sub0.01	x__sub0.01	x__sub0.01	x__sub0.01	x__sub0.01	0	0	0	0	0	0	0	0	0	0	0	0	0	0	0	0	0	0	0	0	0	0	0	0	0	0	0	0	0	0	0	0	0	0	0	0	0	0	0	0	0	0
74c0d16584feed70eb4c9a4030985129_rep;size=26;	x__sub0.01	x__sub0.01	x__sub0.01	x__sub0.01	x__sub0.01	x__sub0.01	x__sub0.01	0	0	0	0	0	0	0	0	0	0	0	0	0	1	0	1	1	0	1	0	1	0	0	0	0	0	0	1	0	0	0	0	0	0	0	0	0	0	0	1	0	0
277926658a07a293760226cfe0dd3012_rep;size=26;	x__sub0.01	x__sub0.01	x__sub0.01	x__sub0.01	x__sub0.01	x__sub0.01	x__sub0.01	0	0	0	0	0	0	0	0	2	0	0	0	3	0	0	0	0	0	0	0	0	0	0	0	0	0	0	0	2	0	0	0	0	0	0	0	0	0	0	0	0	0
aa7fdf0b6c699e8f78ec99b2d82a851a_rep;size=26;	x__sub0.01	x__sub0.01	x__sub0.01	x__sub0.01	x__sub0.01	x__sub0.01	x__sub0.01	0	0	0	0	0	0	0	0	0	0	0	0	0	0	0	0	0	0	0	0	0	0	0	0	0	0	0	0	0	0	0	0	0	0	0	0	0	0	0	0	0	0
ce402fbd085804f5fc82bcec3c6fafa6_rep;size=26;	x__sub0.01	x__sub0.01	x__sub0.01	x__sub0.01	x__sub0.01	x__sub0.01	x__sub0.01	0	0	0	0	0	0	0	0	0	0	0	0	0	0	0	0	0	0	0	0	0	0	0	0	0	0	0	0	0	0	0	0	0	0	0	0	0	0	0	0	0	0
8d820158dab818e45e35d669f5254cb6_rep;size=26;	x__sub0.01	x__sub0.01	x__sub0.01	x__sub0.01	x__sub0.01	x__sub0.01	x__sub0.01	1	0	0	0	0	0	0	0	0	0	0	0	0	0	0	0	0	0	0	0	0	0	0	0	11	0	0	0	1	0	0	0	0	0	0	0	0	0	0	0	0	0
3732ecda58fe7a4964d979a70839bc40_rep;size=26;	x__sub0.01	x__sub0.01	x__sub0.01	x__sub0.01	x__sub0.01	x__sub0.01	x__sub0.01	0	0	0	0	0	0	0	0	0	0	0	0	0	0	0	1	0	0	0	1	0	1	0	0	0	1	0	1	0	0	0	1	0	0	0	4	0	1	0	2	0	0
e2a043fd552d956d4fd16f74f0f74c3a_rep;size=26;	x__sub0.01	x__sub0.01	x__sub0.01	x__sub0.01	x__sub0.01	x__sub0.01	x__sub0.01	0	0	0	0	0	0	0	0	0	0	0	0	0	0	0	0	0	0	0	0	0	0	0	0	0	0	0	0	17	0	0	0	0	0	0	0	0	0	0	0	0	0
3da17c49431674ba50e7f8f0a871176b_rep;size=26;	x__sub0.01	x__sub0.01	x__sub0.01	x__sub0.01	x__sub0.01	x__sub0.01	x__sub0.01	0	0	0	0	0	0	0	0	0	0	0	0	0	0	0	0	0	0	0	0	0	0	0	0	0	0	0	0	0	0	0	0	0	0	0	0	0	0	0	0	0	0
7ae70ef24c6150d0549b4c910983798e_rep;size=26;	x__sub0.01	x__sub0.01	x__sub0.01	x__sub0.01	x__sub0.01	x__sub0.01	x__sub0.01	0	0	0	0	1	0	0	0	0	0	0	0	1	0	0	0	0	0	0	0	1	0	0	0	1	0	0	0	0	0	0	0	0	0	0	0	1	0	0	0	1	0
a78b5bcca39cdc8ec4fa01f88c0105df_rep;size=26;	x__sub0.01	x__sub0.01	x__sub0.01	x__sub0.01	x__sub0.01	x__sub0.01	x__sub0.01	0	0	0	0	0	0	0	0	0	0	0	0	0	0	0	0	0	0	0	0	0	0	0	0	0	0	0	0	0	0	0	0	0	0	0	0	0	0	0	0	0	0
01c2f36f6f02e04df32eb51a2e648156_rep;size=26;	x__sub0.01	x__sub0.01	x__sub0.01	x__sub0.01	x__sub0.01	x__sub0.01	x__sub0.01	0	0	0	0	0	0	0	0	0	0	0	0	0	0	0	0	0	0	0	0	0	0	0	0	0	0	0	0	0	0	0	0	0	0	0	0	0	0	0	0	0	0
754bf48d910026753e0bca3d4eaf2552_rep;size=26;	x__sub0.01	x__sub0.01	x__sub0.01	x__sub0.01	x__sub0.01	x__sub0.01	x__sub0.01	0	0	0	0	0	0	0	0	0	0	0	0	0	0	0	0	0	0	0	0	0	0	0	0	0	0	0	0	0	0	0	0	0	0	0	0	0	0	0	0	0	0
b4a9f674580f02fd5d06cccb24f316c2_rep;size=26;	x__sub0.01	x__sub0.01	x__sub0.01	x__sub0.01	x__sub0.01	x__sub0.01	x__sub0.01	0	0	0	0	0	0	0	0	0	0	0	0	0	0	0	0	0	0	0	0	0	0	0	0	0	0	0	0	0	0	0	0	0	0	0	0	0	0	0	0	0	0
e2eaa7bffd627dcef3e712fdd6b8ca6f_rep;size=26;	x__sub0.01	x__sub0.01	x__sub0.01	x__sub0.01	x__sub0.01	x__sub0.01	x__sub0.01	0	0	0	0	0	0	0	0	0	0	0	0	0	0	0	0	0	0	0	0	0	0	0	0	0	0	0	0	0	0	0	0	0	0	0	0	0	0	0	0	0	0
e724752b056603a937fc81bcf8275f90_rep;size=25;	x__sub0.01	x__sub0.01	x__sub0.01	x__sub0.01	x__sub0.01	x__sub0.01	x__sub0.01	0	0	0	0	1	0	0	0	0	0	0	0	0	0	0	0	0	0	0	0	0	0	0	0	0	0	0	0	0	0	0	0	1	0	0	0	0	0	0	0	0	0
b06a32a29489395ae51c1ca1051f03b6_rep;size=25;	x__sub0.01	x__sub0.01	x__sub0.01	x__sub0.01	x__sub0.01	x__sub0.01	x__sub0.01	0	0	0	0	0	0	0	0	0	0	0	0	0	0	0	0	0	0	0	0	0	0	0	0	0	0	0	0	0	0	0	0	0	0	0	0	0	0	0	0	0	0
7b1867f926186c7764050af62e83ebd1_rep;size=25;	x__sub0.01	x__sub0.01	x__sub0.01	x__sub0.01	x__sub0.01	x__sub0.01	x__sub0.01	0	0	0	0	0	0	0	0	0	0	0	0	0	0	0	0	0	0	0	0	0	0	0	0	0	0	0	0	0	0	0	0	0	0	0	0	0	0	0	0	0	0
6cf5dcd7eacf1a80040c7ca60092cb2e_rep;size=25;	x__sub0.01	x__sub0.01	x__sub0.01	x__sub0.01	x__sub0.01	x__sub0.01	x__sub0.01	0	0	0	0	0	0	0	0	0	0	0	0	0	0	0	0	0	0	0	0	0	0	0	0	0	0	0	0	0	0	0	0	0	0	0	0	0	0	0	0	0	0
6d75516b05b3916edd7e043dc3f5875a_rep;size=25;	x__sub0.01	x__sub0.01	x__sub0.01	x__sub0.01	x__sub0.01	x__sub0.01	x__sub0.01	0	0	0	0	0	0	0	0	0	0	0	0	0	0	0	0	0	0	0	0	0	0	0	0	0	0	0	0	0	0	0	0	0	0	0	0	0	0	0	0	0	0
4bca547452041ede76afcd54d29d2d28_rep;size=25;	x__sub0.01	x__sub0.01	x__sub0.01	x__sub0.01	x__sub0.01	x__sub0.01	x__sub0.01	0	0	0	0	0	0	0	0	0	0	0	0	0	0	0	0	0	0	0	0	0	0	0	0	0	0	0	0	0	0	0	0	0	0	0	0	0	0	0	0	0	0
6e50c65cdf1a3bb6d67eb8ffb614e59a_rep;size=25;	x__sub0.01	x__sub0.01	x__sub0.01	x__sub0.01	x__sub0.01	x__sub0.01	x__sub0.01	0	0	0	0	0	0	0	0	0	0	0	0	0	1	0	0	0	0	0	0	0	0	0	0	0	0	0	0	2	0	0	0	0	0	0	0	0	0	0	0	0	0
759b29192cdd7116c0a9cb78e17140f0_rep;size=25;	x__sub0.01	x__sub0.01	x__sub0.01	x__sub0.01	x__sub0.01	x__sub0.01	x__sub0.01	0	0	0	0	1	0	0	0	0	0	0	0	1	0	0	0	0	0	0	0	0	0	0	0	0	0	0	0	0	0	0	0	0	0	0	0	0	0	0	0	0	0
83a2d0c62e3483077c6d82dec919a2c4_rep;size=25;	x__sub0.01	x__sub0.01	x__sub0.01	x__sub0.01	x__sub0.01	x__sub0.01	x__sub0.01	0	0	0	0	0	0	0	0	0	0	0	2	0	0	2	0	0	0	0	1	0	0	2	0	0	0	0	0	0	0	0	0	0	0	0	1	0	0	0	2	0	0
f783e0b8fe3f7707a5a59ead7cdb0714_rep;size=25;	x__sub0.01	x__sub0.01	x__sub0.01	x__sub0.01	x__sub0.01	x__sub0.01	x__sub0.01	0	0	0	0	0	0	0	0	0	0	0	0	0	0	0	0	0	0	0	0	0	0	0	0	0	0	0	0	0	0	0	0	0	0	0	0	0	0	0	0	0	0
5a8354f23e9f9d7f56002270b198a91b_rep;size=25;	x__sub0.01	x__sub0.01	x__sub0.01	x__sub0.01	x__sub0.01	x__sub0.01	x__sub0.01	0	0	0	0	0	0	0	0	0	0	0	0	0	0	0	0	0	0	0	0	0	0	0	0	0	0	0	0	0	0	0	0	0	0	0	0	0	0	0	0	0	0
1456efbc94d182271672bf50c4a5c708_rep;size=25;	x__sub0.01	x__sub0.01	x__sub0.01	x__sub0.01	x__sub0.01	x__sub0.01	x__sub0.01	0	0	0	0	0	0	0	0	0	0	0	0	0	0	0	0	0	0	0	0	0	0	0	0	0	0	0	0	0	0	0	0	0	0	0	0	0	0	0	0	0	0
c35f1f33c05f2fc80facf1ac35440a04_rep;size=25;	x__sub0.01	x__sub0.01	x__sub0.01	x__sub0.01	x__sub0.01	x__sub0.01	x__sub0.01	0	0	0	0	0	0	0	0	0	0	0	0	0	0	0	0	0	0	0	0	0	0	0	0	1	0	0	0	0	0	0	0	0	0	0	0	0	0	0	0	0	0
6906f9029ae457bdca600e7cfa03184e_rep;size=25;	x__sub0.01	x__sub0.01	x__sub0.01	x__sub0.01	x__sub0.01	x__sub0.01	x__sub0.01	0	0	0	0	0	0	0	0	0	0	0	0	0	1	0	0	0	0	0	1	0	0	0	2	0	2	0	0	0	1	0	0	0	1	0	1	0	0	0	2	0	0
8b99d6cc7e01706a5131a068f4bfea20_rep;size=25;	x__sub0.01	x__sub0.01	x__sub0.01	x__sub0.01	x__sub0.01	x__sub0.01	x__sub0.01	0	0	0	0	0	0	0	0	0	0	0	0	0	0	0	0	0	0	0	0	0	0	0	0	0	0	0	0	0	0	0	0	0	0	0	0	0	0	0	0	0	0
99c3b5a5b94a5524fe0ba190320b218a_rep;size=25;	x__sub0.01	x__sub0.01	x__sub0.01	x__sub0.01	x__sub0.01	x__sub0.01	x__sub0.01	0	0	0	0	0	0	0	0	0	0	0	0	0	0	0	0	0	0	0	0	0	0	0	0	0	0	0	0	0	0	0	0	0	0	0	0	0	0	0	0	0	0
f45fcbbc555d39b50376adbc07d911c4_rep;size=25;	x__sub0.01	x__sub0.01	x__sub0.01	x__sub0.01	x__sub0.01	x__sub0.01	x__sub0.01	0	0	0	0	0	0	0	0	0	0	0	0	0	0	0	0	0	0	0	0	0	0	0	0	0	0	0	0	0	0	0	0	0	0	0	0	0	0	0	0	0	0
8e90769c90172b35268f3d8f8573d458_rep;size=25;	x__sub0.01	x__sub0.01	x__sub0.01	x__sub0.01	x__sub0.01	x__sub0.01	x__sub0.01	0	0	0	0	0	0	0	0	0	0	0	0	0	0	0	0	0	0	0	0	0	0	0	0	0	0	0	0	0	0	0	0	0	0	0	0	0	0	0	0	0	0
ba95fdb67ab313a3713036519b0625de_rep;size=25;	x__sub0.01	x__sub0.01	x__sub0.01	x__sub0.01	x__sub0.01	x__sub0.01	x__sub0.01	0	0	0	0	0	0	0	0	0	0	0	0	0	0	1	0	0	0	0	0	0	0	0	0	0	0	0	0	0	0	0	0	0	0	0	0	0	0	0	0	0	0
1eaf993099a7f21b40f47282f9ad218b_rep;size=25;	x__sub0.01	x__sub0.01	x__sub0.01	x__sub0.01	x__sub0.01	x__sub0.01	x__sub0.01	0	0	0	0	0	0	0	0	0	0	0	0	0	0	0	0	0	0	0	0	0	0	0	0	0	0	0	0	0	0	0	0	0	0	0	0	0	0	0	0	0	0
adb5de98d3687eaf61acd9fbfc3074be_rep;size=25;	x__sub0.01	x__sub0.01	x__sub0.01	x__sub0.01	x__sub0.01	x__sub0.01	x__sub0.01	0	0	0	0	0	0	0	0	0	0	0	0	0	2	0	0	0	0	0	0	0	0	0	0	0	0	2	2	0	0	1	1	0	3	1	1	0	0	0	3	0	0
c704d56a17230e3d161c7e993edf8c11_rep;size=25;	x__sub0.01	x__sub0.01	x__sub0.01	x__sub0.01	x__sub0.01	x__sub0.01	x__sub0.01	0	0	0	0	0	2	1	0	0	0	0	0	0	0	1	1	0	0	0	0	0	0	1	0	0	0	0	1	0	0	0	0	0	0	1	3	0	0	0	6	0	0
d90bfefa476645c7a4c680f9a1bba944_rep;size=25;	x__sub0.01	x__sub0.01	x__sub0.01	x__sub0.01	x__sub0.01	x__sub0.01	x__sub0.01	0	0	0	0	0	0	0	0	0	0	0	0	0	0	0	0	0	0	0	0	0	0	0	0	0	0	0	0	0	0	0	0	0	0	0	0	0	0	0	0	0	0
2e93a45b9461f037855cd61bb46d83d7_rep;size=24;	x__sub0.01	x__sub0.01	x__sub0.01	x__sub0.01	x__sub0.01	x__sub0.01	x__sub0.01	0	0	0	0	0	0	0	0	0	0	0	0	0	0	0	0	0	0	0	0	0	0	0	0	0	0	0	0	0	0	0	0	0	0	0	0	0	0	0	0	0	0
fef27eafe55ff4bf28bad0f094852611_rep;size=24;	x__sub0.01	x__sub0.01	x__sub0.01	x__sub0.01	x__sub0.01	x__sub0.01	x__sub0.01	0	0	0	0	0	0	0	0	0	0	0	0	0	0	0	0	3	0	0	0	0	0	0	0	0	0	0	0	0	0	0	0	0	0	0	0	0	0	0	0	0	0
18ecf2b9d525b150b5429c922017ca57_rep;size=24;	x__sub0.01	x__sub0.01	x__sub0.01	x__sub0.01	x__sub0.01	x__sub0.01	x__sub0.01	1	0	0	0	0	0	0	0	4	0	0	0	1	0	0	0	5	0	0	0	0	0	0	0	0	0	0	0	0	0	0	0	0	0	0	0	1	0	0	0	1	0
559c06b16be09b50aa559890689d8dc1_rep;size=24;	x__sub0.01	x__sub0.01	x__sub0.01	x__sub0.01	x__sub0.01	x__sub0.01	x__sub0.01	0	0	0	0	0	0	0	0	0	0	0	0	0	0	0	0	0	0	0	0	0	0	0	0	0	0	0	0	0	0	0	0	0	0	0	0	0	0	0	0	0	0
a1b768be0e3257a35e0629a42e7b4380_rep;size=24;	x__sub0.01	x__sub0.01	x__sub0.01	x__sub0.01	x__sub0.01	x__sub0.01	x__sub0.01	0	0	0	0	0	0	0	0	0	0	0	0	0	0	0	0	1	0	0	0	0	0	0	0	0	0	0	0	0	0	0	0	0	0	0	0	0	0	0	0	0	0
15956bd8f6806cc011f03043f870e015_rep;size=24;	x__sub0.01	x__sub0.01	x__sub0.01	x__sub0.01	x__sub0.01	x__sub0.01	x__sub0.01	0	0	0	0	0	0	0	0	0	0	0	0	0	0	1	0	0	0	1	0	0	0	0	0	0	0	0	0	0	0	0	0	0	0	0	2	0	0	0	0	0	0
10aca648d317c6ab3c0e447dd81cd39b_rep;size=24;	x__sub0.01	x__sub0.01	x__sub0.01	x__sub0.01	x__sub0.01	x__sub0.01	x__sub0.01	1	0	0	0	0	1	0	0	0	0	0	0	0	0	0	1	0	0	0	0	0	0	0	0	0	0	0	0	0	0	0	0	0	0	0	0	0	0	0	0	0	0
c113d2ddb9051a7e514bd3f654b53f3f_rep;size=24;	x__sub0.01	x__sub0.01	x__sub0.01	x__sub0.01	x__sub0.01	x__sub0.01	x__sub0.01	0	0	0	0	0	0	0	0	1	0	0	0	0	0	0	0	0	0	0	0	1	0	0	0	1	0	0	0	0	0	0	0	0	0	0	0	7	0	0	0	0	0
888fdc9ef151f61a64b6ce511306fda7_rep;size=24;	x__sub0.01	x__sub0.01	x__sub0.01	x__sub0.01	x__sub0.01	x__sub0.01	x__sub0.01	0	0	0	0	0	0	0	0	3	0	0	0	3	0	0	0	1	0	0	0	0	0	0	0	0	0	0	0	0	0	0	0	0	0	0	0	0	0	0	0	3	0
4aba2f3a7b53cd8bc157a1df63b08c8d_rep;size=24;	x__sub0.01	x__sub0.01	x__sub0.01	x__sub0.01	x__sub0.01	x__sub0.01	x__sub0.01	0	0	0	0	0	0	0	0	0	0	0	0	0	0	0	0	0	0	0	0	0	0	0	0	0	0	0	0	0	0	0	0	0	0	0	0	0	0	0	0	0	0
706c0270a4cb9096dc262c06acdc5d32_rep;size=24;	x__sub0.01	x__sub0.01	x__sub0.01	x__sub0.01	x__sub0.01	x__sub0.01	x__sub0.01	0	0	0	0	0	0	0	0	0	0	0	0	0	0	0	0	0	0	0	0	0	0	0	0	0	0	0	0	0	0	0	0	0	0	0	0	0	0	0	0	0	0
a44ade064c91cf5ba5d4a3df659eef9f_rep;size=24;	x__sub0.01	x__sub0.01	x__sub0.01	x__sub0.01	x__sub0.01	x__sub0.01	x__sub0.01	0	0	0	0	0	0	0	0	0	0	0	0	0	0	0	0	0	0	0	0	0	0	0	0	0	0	0	0	0	0	0	0	0	0	0	0	1	0	0	0	0	0
ac04feccfd2528293f4f5a0aeee2ad6f_rep;size=24;	x__sub0.01	x__sub0.01	x__sub0.01	x__sub0.01	x__sub0.01	x__sub0.01	x__sub0.01	0	0	0	0	0	0	0	0	0	0	0	0	0	0	0	0	0	0	0	0	0	0	0	0	0	0	0	0	0	0	0	0	0	0	0	0	0	0	0	0	0	0
773599bb066a141ca2cf9fa7d59d2cb6_rep;size=24;	x__sub0.01	x__sub0.01	x__sub0.01	x__sub0.01	x__sub0.01	x__sub0.01	x__sub0.01	0	0	0	0	0	0	0	0	0	0	0	0	0	0	0	0	0	0	0	0	0	0	0	0	0	0	0	0	0	0	0	0	0	0	0	0	0	0	0	0	0	0
0f17898c976ae6e3422e1b55454768d3_rep;size=24;	x__sub0.01	x__sub0.01	x__sub0.01	x__sub0.01	x__sub0.01	x__sub0.01	x__sub0.01	0	0	0	0	0	0	0	0	0	0	0	0	0	0	0	0	0	0	0	0	0	0	0	0	0	0	0	0	0	0	0	0	0	0	0	0	0	0	0	0	0	0
83f5779d679fe54eee7ba2f51054ca6d_rep;size=24;	x__sub0.01	x__sub0.01	x__sub0.01	x__sub0.01	x__sub0.01	x__sub0.01	x__sub0.01	0	0	0	0	0	0	0	0	0	0	0	0	0	0	0	0	0	0	0	0	0	0	0	0	0	0	0	0	0	0	0	0	0	0	0	0	0	0	0	0	0	0
94f19c837005f393de1a3cf3955e566d_rep;size=24;	x__sub0.01	x__sub0.01	x__sub0.01	x__sub0.01	x__sub0.01	x__sub0.01	x__sub0.01	0	0	0	0	0	0	0	0	1	0	0	0	3	0	0	0	0	0	0	0	0	0	0	0	0	0	0	0	0	0	0	0	0	0	0	0	0	0	0	0	3	0
3ddca114c5d183191cd81086af3d52da_rep;size=24;	x__sub0.01	x__sub0.01	x__sub0.01	x__sub0.01	x__sub0.01	x__sub0.01	x__sub0.01	0	0	0	0	0	0	0	0	0	0	0	0	0	0	0	0	0	0	0	0	0	0	0	0	0	0	0	0	0	0	0	0	0	0	0	0	0	0	0	0	0	0
c567cdc67b2194c652aa2c49fe5cb79a_rep;size=24;	x__sub0.01	x__sub0.01	x__sub0.01	x__sub0.01	x__sub0.01	x__sub0.01	x__sub0.01	0	0	0	0	0	0	0	0	0	0	1	0	0	0	0	0	0	0	0	0	0	0	1	1	0	0	2	2	0	0	1	5	0	1	0	0	0	0	1	4	0	1
93fe86810a72632d93dc0e3dd32ac6a6_rep;size=24;	x__sub0.01	x__sub0.01	x__sub0.01	x__sub0.01	x__sub0.01	x__sub0.01	x__sub0.01	0	0	0	0	0	0	0	0	0	0	0	0	0	0	0	0	0	0	0	0	0	0	0	0	0	0	0	0	0	0	0	0	0	0	0	0	0	0	0	0	0	0
e7badea0f3c1264016945f791f986c24_rep;size=24;	x__sub0.01	x__sub0.01	x__sub0.01	x__sub0.01	x__sub0.01	x__sub0.01	x__sub0.01	0	0	0	0	0	0	0	0	0	0	0	0	0	0	0	0	0	0	0	0	0	0	0	0	0	0	0	0	0	0	0	0	0	0	0	0	0	0	0	0	0	0
da76d283800cff1be3f3ec5f8db70a92_rep;size=24;	x__sub0.01	x__sub0.01	x__sub0.01	x__sub0.01	x__sub0.01	x__sub0.01	x__sub0.01	0	0	0	0	0	0	0	0	0	0	0	0	0	0	0	0	0	0	0	0	0	0	0	0	0	0	0	0	0	0	0	1	0	0	0	0	0	0	0	0	0	0
b64c86444e9e52f8035f43537b1d254c_rep;size=24;	x__sub0.01	x__sub0.01	x__sub0.01	x__sub0.01	x__sub0.01	x__sub0.01	x__sub0.01	0	0	0	0	0	0	0	0	0	0	0	0	0	0	0	0	0	0	0	0	0	0	0	0	0	0	0	0	0	0	0	0	0	0	0	0	0	0	0	0	0	0
1f7503912a82ff4b88819d1572bade0f_rep;size=23;	x__sub0.01	x__sub0.01	x__sub0.01	x__sub0.01	x__sub0.01	x__sub0.01	x__sub0.01	0	0	0	0	0	0	0	0	0	0	0	0	0	0	0	0	0	0	0	0	0	0	0	0	1	0	0	0	0	0	0	0	0	0	0	0	1	0	0	0	0	0
d10b35aa991cdc8a6c44b8ce46b84fca_rep;size=23;	x__sub0.01	x__sub0.01	x__sub0.01	x__sub0.01	x__sub0.01	x__sub0.01	x__sub0.01	0	0	0	0	0	0	0	0	0	0	0	0	0	0	0	0	0	0	1	0	0	0	0	0	0	0	0	0	0	0	0	0	0	0	0	0	0	0	0	0	0	0
6f7dfe5f08d1b5401b3f54f1c097c994_rep;size=23;	x__sub0.01	x__sub0.01	x__sub0.01	x__sub0.01	x__sub0.01	x__sub0.01	x__sub0.01	0	0	0	0	0	0	0	0	0	0	1	0	0	0	0	0	0	0	0	0	0	0	0	0	0	0	0	0	0	0	0	0	0	0	0	0	0	0	0	0	0	0
a8849ba60f90de9033c23338ff2f88f1_rep;size=23;	x__sub0.01	x__sub0.01	x__sub0.01	x__sub0.01	x__sub0.01	x__sub0.01	x__sub0.01	0	0	0	0	0	0	0	0	0	0	0	0	0	0	0	0	0	0	0	0	0	0	0	0	0	0	0	0	0	0	0	0	0	0	0	0	0	0	0	0	0	0
4969880c014cf871db138889ddae91a9_rep;size=23;	x__sub0.01	x__sub0.01	x__sub0.01	x__sub0.01	x__sub0.01	x__sub0.01	x__sub0.01	0	0	0	0	1	0	0	0	0	0	0	0	2	0	0	0	0	0	0	0	0	0	0	0	1	0	0	0	0	0	0	0	0	0	0	0	0	0	0	0	2	0
d0d893905dfbeba23b00997e515302bf_rep;size=23;	x__sub0.01	x__sub0.01	x__sub0.01	x__sub0.01	x__sub0.01	x__sub0.01	x__sub0.01	0	0	0	0	0	0	0	0	0	0	0	0	1	0	0	0	0	0	0	0	0	0	0	0	0	0	0	0	6	0	0	0	0	0	0	0	0	0	0	0	0	0
10fc35172058d85c186c4f723da7a1b2_rep;size=23;	x__sub0.01	x__sub0.01	x__sub0.01	x__sub0.01	x__sub0.01	x__sub0.01	x__sub0.01	0	0	0	0	0	0	0	0	0	0	0	0	0	0	0	0	0	0	0	0	0	0	0	0	0	0	0	0	0	0	0	0	0	0	0	0	0	0	0	0	0	0
9789b6b0eb103dff6bbe2c460c962f91_rep;size=23;	x__sub0.01	x__sub0.01	x__sub0.01	x__sub0.01	x__sub0.01	x__sub0.01	x__sub0.01	0	0	0	0	0	0	0	0	0	0	0	0	0	0	0	0	0	0	0	0	0	0	0	0	0	0	0	0	0	0	0	0	0	0	0	0	0	0	0	0	0	0
cbf151afa62ebc72d838200a5d4fe3ca_rep;size=23;	x__sub0.01	x__sub0.01	x__sub0.01	x__sub0.01	x__sub0.01	x__sub0.01	x__sub0.01	0	0	0	0	0	0	0	0	0	0	0	0	0	0	0	0	0	0	0	0	0	0	0	0	0	0	0	0	0	0	0	0	0	0	0	0	0	0	0	0	0	0
47d2f409fcdc51df5f9eddb09b555434_rep;size=23;	x__sub0.01	x__sub0.01	x__sub0.01	x__sub0.01	x__sub0.01	x__sub0.01	x__sub0.01	0	0	0	0	0	0	0	0	0	0	0	0	0	0	0	0	0	0	0	0	2	0	0	0	0	0	0	0	1	0	0	0	2	0	0	0	2	0	0	0	0	0
6e337611a077b59f4be42adea6848966_rep;size=23;	x__sub0.01	x__sub0.01	x__sub0.01	x__sub0.01	x__sub0.01	x__sub0.01	x__sub0.01	0	0	0	0	0	0	0	0	0	0	0	0	0	0	0	0	0	0	0	0	0	0	0	0	0	0	0	0	0	0	0	0	0	0	0	0	0	0	0	0	0	0
9beab00abe5d3835c0abc3e1266664b0_rep;size=23;	x__sub0.01	x__sub0.01	x__sub0.01	x__sub0.01	x__sub0.01	x__sub0.01	x__sub0.01	0	0	1	0	0	0	0	1	0	0	0	0	0	0	0	1	0	0	0	0	0	0	0	0	0	0	0	1	0	0	0	0	0	0	0	0	0	0	0	0	0	0
4af3dab1fbbf75258122ce2cc6e35f1c_rep;size=23;	x__sub0.01	x__sub0.01	x__sub0.01	x__sub0.01	x__sub0.01	x__sub0.01	x__sub0.01	0	0	0	2	0	0	0	0	0	0	0	0	0	2	0	1	0	0	1	0	0	0	1	0	0	0	1	1	0	1	0	1	0	1	0	0	0	0	0	1	0	1
cb469bede325c16036fcc9ffdd5a7754_rep;size=23;	x__sub0.01	x__sub0.01	x__sub0.01	x__sub0.01	x__sub0.01	x__sub0.01	x__sub0.01	0	0	0	0	0	0	0	0	0	0	0	0	0	0	0	0	0	0	0	0	0	0	0	0	0	0	0	0	0	0	0	0	0	0	0	0	0	0	0	0	0	0
f5865e7572790037005a5093016157e6_rep;size=23;	x__sub0.01	x__sub0.01	x__sub0.01	x__sub0.01	x__sub0.01	x__sub0.01	x__sub0.01	0	0	0	0	0	0	0	0	0	0	0	0	0	0	0	0	0	0	0	0	0	0	0	0	0	0	0	0	0	0	0	0	0	0	0	0	0	0	0	0	0	0
5fb7cbf394c43e5da84ddeffd783774a_rep;size=23;	x__sub0.01	x__sub0.01	x__sub0.01	x__sub0.01	x__sub0.01	x__sub0.01	x__sub0.01	0	0	0	0	0	0	0	1	0	0	0	0	0	0	0	0	0	0	0	0	0	0	0	0	0	0	0	0	0	0	0	1	0	0	0	0	0	0	0	0	0	0
9b5842c3365b9c766dfdb02c51fa1d31_rep;size=23;	x__sub0.01	x__sub0.01	x__sub0.01	x__sub0.01	x__sub0.01	x__sub0.01	x__sub0.01	1	0	0	0	0	0	0	0	0	0	0	0	0	0	0	0	1	0	0	0	1	0	0	0	0	0	0	0	0	0	0	0	0	0	0	0	0	0	0	0	0	0
0634961eb5807dc44f1f8fc84345b903_rep;size=23;	x__sub0.01	x__sub0.01	x__sub0.01	x__sub0.01	x__sub0.01	x__sub0.01	x__sub0.01	0	0	0	0	0	0	0	0	0	0	0	1	0	0	0	0	0	0	0	0	0	0	0	0	0	0	0	0	0	0	0	0	0	0	1	0	0	0	0	0	0	0
6fe1cbd323ce85c72d45555591991b78_rep;size=23;	x__sub0.01	x__sub0.01	x__sub0.01	x__sub0.01	x__sub0.01	x__sub0.01	x__sub0.01	0	0	0	0	0	0	0	0	0	0	0	0	0	0	0	0	0	0	0	0	1	0	0	0	0	0	0	0	1	0	0	0	0	0	0	0	0	0	0	0	0	0
4873a2f565a98fa28d51bca6d4843c8c_rep;size=23;	x__sub0.01	x__sub0.01	x__sub0.01	x__sub0.01	x__sub0.01	x__sub0.01	x__sub0.01	0	0	0	0	0	0	0	0	0	0	0	0	0	0	0	0	0	0	0	0	0	0	0	0	0	0	0	0	0	0	0	0	0	0	0	0	0	0	0	0	0	0
6a0dd5dc8a937b46ca3a9348606c23b2_rep;size=23;	x__sub0.01	x__sub0.01	x__sub0.01	x__sub0.01	x__sub0.01	x__sub0.01	x__sub0.01	0	0	0	0	0	0	0	0	0	0	0	0	0	0	0	0	1	0	0	0	0	0	0	0	2	0	0	0	0	0	0	0	1	0	0	0	0	0	0	0	1	0
9b62c6e9ce46d0cdf2cb363dd2a023c3_rep;size=23;	x__sub0.01	x__sub0.01	x__sub0.01	x__sub0.01	x__sub0.01	x__sub0.01	x__sub0.01	0	0	0	0	0	0	0	0	0	0	0	0	0	0	0	0	0	0	0	0	2	0	0	0	0	0	0	0	0	0	0	0	0	0	0	0	3	0	0	0	0	0
edb321ac5f06743a6dbb527bdbc32ab3_rep;size=23;	x__sub0.01	x__sub0.01	x__sub0.01	x__sub0.01	x__sub0.01	x__sub0.01	x__sub0.01	0	0	0	0	0	0	0	0	0	0	0	0	0	0	0	0	0	0	0	0	0	0	0	0	0	0	0	0	0	0	0	0	0	0	0	0	0	0	0	0	0	0
90e1d8263f84ebb3d9f4b4e3dbe4feba_rep;size=23;	x__sub0.01	x__sub0.01	x__sub0.01	x__sub0.01	x__sub0.01	x__sub0.01	x__sub0.01	1	1	0	0	0	1	0	0	0	0	0	0	0	0	0	1	0	1	0	0	0	0	0	1	0	1	0	1	0	0	0	1	0	0	0	1	1	1	0	0	0	0
573e1004aba5361a66cb22aa524682be_rep;size=23;	x__sub0.01	x__sub0.01	x__sub0.01	x__sub0.01	x__sub0.01	x__sub0.01	x__sub0.01	0	0	0	0	0	0	0	0	0	0	0	0	0	0	0	0	0	0	0	0	0	0	0	0	0	0	0	0	0	0	0	0	0	0	0	0	0	0	0	0	0	0
89c56921062f35b1aa9a23bb47d26035_rep;size=23;	x__sub0.01	x__sub0.01	x__sub0.01	x__sub0.01	x__sub0.01	x__sub0.01	x__sub0.01	0	0	0	0	1	0	0	0	0	0	0	0	0	0	0	0	0	0	0	0	0	0	0	0	0	0	0	0	0	0	0	0	0	0	0	0	0	0	0	0	0	0
2e9a0152f66c5496080b677ef483f1ef_rep;size=23;	x__sub0.01	x__sub0.01	x__sub0.01	x__sub0.01	x__sub0.01	x__sub0.01	x__sub0.01	0	0	0	0	0	0	0	0	0	0	0	0	0	0	0	0	0	0	0	0	0	0	0	0	0	0	0	0	0	0	0	0	0	0	0	0	0	0	0	0	0	0
bc32d7c057c2baafe3c30956215ca7a3_rep;size=23;	x__sub0.01	x__sub0.01	x__sub0.01	x__sub0.01	x__sub0.01	x__sub0.01	x__sub0.01	0	0	0	0	0	0	1	0	0	0	0	0	1	0	2	1	0	0	2	0	1	0	0	1	0	0	1	0	0	0	0	0	0	0	0	0	0	0	0	0	0	0
1d0e34d5e67612a2057248cb045185dd_rep;size=23;	x__sub0.01	x__sub0.01	x__sub0.01	x__sub0.01	x__sub0.01	x__sub0.01	x__sub0.01	0	0	0	0	1	0	1	0	0	0	0	1	0	0	0	0	1	0	0	0	0	0	0	0	0	0	0	0	0	0	0	0	0	0	0	0	0	0	0	0	0	0
31dcdc1e5b3d6977216f490ad5bc3fd2_rep;size=23;	x__sub0.01	x__sub0.01	x__sub0.01	x__sub0.01	x__sub0.01	x__sub0.01	x__sub0.01	0	0	0	0	0	0	0	0	0	0	0	0	0	0	0	0	0	0	0	0	0	0	0	0	0	0	0	0	0	0	0	0	0	0	0	0	0	0	0	0	0	0
bfdeaa8ecac47b3cd58708004713da35_rep;size=23;	x__sub0.01	x__sub0.01	x__sub0.01	x__sub0.01	x__sub0.01	x__sub0.01	x__sub0.01	0	0	0	0	0	0	0	0	0	0	0	0	0	0	0	0	0	0	0	0	0	0	0	0	0	0	0	0	0	0	0	0	0	0	0	0	0	0	0	0	0	0
a486d8027672e9f5fdd07e7a83760355_rep;size=23;	x__sub0.01	x__sub0.01	x__sub0.01	x__sub0.01	x__sub0.01	x__sub0.01	x__sub0.01	0	0	0	0	0	0	0	0	0	0	0	0	0	0	0	0	0	0	0	0	0	0	0	0	0	0	0	0	0	0	0	0	0	0	0	0	0	0	0	0	0	0
32cc02c9e76f3a7ddf80d4c5963d6657_rep;size=23;	x__sub0.01	x__sub0.01	x__sub0.01	x__sub0.01	x__sub0.01	x__sub0.01	x__sub0.01	0	0	0	0	0	0	0	0	0	0	0	0	0	0	0	0	0	0	0	0	0	0	0	0	0	0	0	0	0	0	0	0	0	0	0	0	0	0	0	0	0	0
7af02299b3e66baebc0e245090eaf884_rep;size=22;	x__sub0.01	x__sub0.01	x__sub0.01	x__sub0.01	x__sub0.01	x__sub0.01	x__sub0.01	0	0	0	0	0	0	0	0	0	0	0	0	0	0	0	0	0	0	0	0	0	0	0	0	1	0	0	0	0	0	0	0	0	0	0	0	2	0	0	0	0	0
e2660cfdec59f4639cfbb6bbb8ebde36_rep;size=22;	x__sub0.01	x__sub0.01	x__sub0.01	x__sub0.01	x__sub0.01	x__sub0.01	x__sub0.01	0	0	0	0	0	0	0	0	0	0	0	0	0	0	0	0	0	0	0	0	0	0	0	0	0	0	0	0	0	0	0	0	0	0	0	0	0	0	0	0	0	0
5f0d503acf62db98433dc056d6ba3ab4_rep;size=22;	x__sub0.01	x__sub0.01	x__sub0.01	x__sub0.01	x__sub0.01	x__sub0.01	x__sub0.01	0	0	0	0	0	0	0	0	0	0	0	0	0	0	0	0	0	0	0	0	0	0	0	0	0	0	0	0	0	0	0	0	0	0	0	0	0	0	0	0	0	0
98e99c592c7cd9914dceb66541a77deb_rep;size=22;	x__sub0.01	x__sub0.01	x__sub0.01	x__sub0.01	x__sub0.01	x__sub0.01	x__sub0.01	0	0	0	0	0	0	0	0	0	0	0	0	2	0	0	0	0	0	0	0	0	0	0	0	0	0	0	0	2	0	0	0	0	0	0	0	1	0	0	0	0	0
b406ad0f6e68f4c1536c2c13bd3e2d33_rep;size=22;	x__sub0.01	x__sub0.01	x__sub0.01	x__sub0.01	x__sub0.01	x__sub0.01	x__sub0.01	0	0	0	0	0	0	0	0	0	0	0	0	0	0	0	0	0	0	0	0	1	0	0	0	0	0	0	0	0	0	0	0	0	0	0	0	0	0	0	0	0	0
d10a1e105bf4daa73382ecc149f36566_rep;size=22;	x__sub0.01	x__sub0.01	x__sub0.01	x__sub0.01	x__sub0.01	x__sub0.01	x__sub0.01	0	0	0	0	0	0	0	0	2	0	0	0	0	0	0	0	0	0	0	0	0	0	0	0	0	0	0	0	0	0	0	0	0	0	0	0	0	0	0	0	0	0
3b93ee546b5550df54b707917cc4c36f_rep;size=22;	x__sub0.01	x__sub0.01	x__sub0.01	x__sub0.01	x__sub0.01	x__sub0.01	x__sub0.01	0	0	0	0	0	0	0	0	0	0	0	0	0	0	0	0	0	0	0	0	0	0	0	0	0	0	0	0	0	0	0	0	0	0	0	0	0	0	0	0	0	0
3eba4da233f8b07d681b712389e53f9e_rep;size=22;	x__sub0.01	x__sub0.01	x__sub0.01	x__sub0.01	x__sub0.01	x__sub0.01	x__sub0.01	1	0	0	0	0	0	0	0	1	0	0	0	0	0	0	0	2	0	0	0	0	0	0	0	0	0	0	0	3	0	0	0	0	0	0	0	0	0	0	0	0	0
593b519d4d22ef10222a13565c17e398_rep;size=22;	x__sub0.01	x__sub0.01	x__sub0.01	x__sub0.01	x__sub0.01	x__sub0.01	x__sub0.01	0	0	0	0	0	0	0	0	0	0	0	0	0	0	0	0	0	0	0	0	0	0	0	0	0	0	0	0	0	0	0	0	0	0	0	0	0	0	0	0	0	0
5cf3ac65c0dd117c50a08a2e7ddb194e_rep;size=22;	x__sub0.01	x__sub0.01	x__sub0.01	x__sub0.01	x__sub0.01	x__sub0.01	x__sub0.01	0	0	0	0	0	0	0	0	0	0	0	0	0	0	0	0	0	0	0	0	1	0	0	0	0	0	0	0	0	0	0	0	0	0	0	0	0	0	0	0	21	0
b260049634ca9e3262eb0ec04fa40246_rep;size=22;	x__sub0.01	x__sub0.01	x__sub0.01	x__sub0.01	x__sub0.01	x__sub0.01	x__sub0.01	1	0	0	0	1	0	0	0	0	0	0	0	0	0	0	0	0	0	0	0	0	0	0	0	1	0	0	0	4	0	0	0	0	0	0	0	0	0	0	0	0	0
ce578415064bd989c809de7af43e6896_rep;size=22;	x__sub0.01	x__sub0.01	x__sub0.01	x__sub0.01	x__sub0.01	x__sub0.01	x__sub0.01	2	0	0	0	0	0	0	0	1	0	0	0	0	0	0	0	1	0	0	0	0	0	0	0	0	0	0	0	1	0	0	0	0	0	0	0	0	0	0	0	1	0
2cb08fb22c485fb755c1652f71aaa40f_rep;size=22;	x__sub0.01	x__sub0.01	x__sub0.01	x__sub0.01	x__sub0.01	x__sub0.01	x__sub0.01	0	0	0	0	0	0	0	0	0	0	0	0	0	0	0	0	0	0	0	0	0	0	0	0	2	0	0	0	0	0	0	0	0	0	0	0	0	0	0	0	0	0
365823164e08d944d0d0a57ea2d66301_rep;size=22;	x__sub0.01	x__sub0.01	x__sub0.01	x__sub0.01	x__sub0.01	x__sub0.01	x__sub0.01	0	0	0	0	0	0	0	0	1	0	0	0	1	0	0	0	0	0	0	0	0	0	0	0	2	0	0	0	4	0	0	0	0	0	0	0	0	0	0	0	0	0
7b13d53fda8ea7ab2a0e34f07ccc3786_rep;size=22;	x__sub0.01	x__sub0.01	x__sub0.01	x__sub0.01	x__sub0.01	x__sub0.01	x__sub0.01	0	0	0	0	0	0	0	0	0	0	0	0	0	0	0	0	0	0	0	0	0	0	0	0	0	0	0	0	0	0	0	0	0	0	0	0	0	0	0	0	0	0
6a79921af81780d78fe67043059c2099_rep;size=22;	x__sub0.01	x__sub0.01	x__sub0.01	x__sub0.01	x__sub0.01	x__sub0.01	x__sub0.01	0	0	0	0	0	0	0	0	0	0	0	1	0	0	0	0	0	0	0	2	0	0	0	0	0	0	0	0	0	0	0	0	0	0	0	0	0	0	0	0	0	0
92ccd93af9d82b052d91009734542138_rep;size=22;	x__sub0.01	x__sub0.01	x__sub0.01	x__sub0.01	x__sub0.01	x__sub0.01	x__sub0.01	0	0	0	0	0	0	0	0	0	0	0	0	0	0	0	0	0	0	0	0	0	0	0	0	0	0	1	0	0	0	0	0	0	0	0	0	0	0	0	0	0	0
a2709f97893350b0c0dabba6280957b1_rep;size=22;	x__sub0.01	x__sub0.01	x__sub0.01	x__sub0.01	x__sub0.01	x__sub0.01	x__sub0.01	0	0	0	0	0	0	0	0	1	0	0	0	3	0	0	0	0	0	0	0	0	0	0	0	0	0	0	0	0	0	0	0	0	0	0	0	0	0	0	0	0	0
1473e3809c47e2d11536d5eca9a6df84_rep;size=22;	x__sub0.01	x__sub0.01	x__sub0.01	x__sub0.01	x__sub0.01	x__sub0.01	x__sub0.01	2	0	0	0	1	0	0	0	0	0	0	0	0	0	0	0	0	0	0	0	1	0	0	0	0	0	0	0	0	0	0	0	0	0	0	0	0	0	0	0	0	0
242d863dc469d243a2b8d5f50d2eccf0_rep;size=22;	x__sub0.01	x__sub0.01	x__sub0.01	x__sub0.01	x__sub0.01	x__sub0.01	x__sub0.01	0	0	0	0	0	0	0	0	1	0	0	0	1	0	0	0	1	0	0	0	0	0	0	0	0	0	0	0	0	0	0	0	0	0	0	0	0	0	0	0	0	0
4bad1ef9cb0da24731d2296fe2fd84f8_rep;size=22;	x__sub0.01	x__sub0.01	x__sub0.01	x__sub0.01	x__sub0.01	x__sub0.01	x__sub0.01	1	0	0	0	0	0	0	0	0	0	0	0	1	0	0	0	0	0	0	0	0	0	0	0	0	0	0	0	0	0	0	0	0	0	0	0	0	0	0	0	0	0
6bdc045e2b915294ffc93237ba818470_rep;size=22;	x__sub0.01	x__sub0.01	x__sub0.01	x__sub0.01	x__sub0.01	x__sub0.01	x__sub0.01	0	0	0	0	1	0	0	0	0	0	0	0	1	0	0	0	0	0	0	0	0	0	0	0	0	0	0	0	1	0	0	0	1	0	0	0	4	0	0	0	1	0
431a16070127d27b95f49db34d5329b9_rep;size=22;	x__sub0.01	x__sub0.01	x__sub0.01	x__sub0.01	x__sub0.01	x__sub0.01	x__sub0.01	0	0	1	1	0	0	0	0	0	0	0	0	0	0	0	0	0	1	0	0	0	0	2	0	0	0	2	1	0	0	0	1	0	0	1	0	0	0	0	0	0	0
5258db4f59925823ef9d015055a3a515_rep;size=22;	x__sub0.01	x__sub0.01	x__sub0.01	x__sub0.01	x__sub0.01	x__sub0.01	x__sub0.01	0	0	0	2	0	0	0	1	0	0	0	0	0	0	1	0	0	0	0	0	0	0	0	0	0	0	0	0	0	0	0	0	0	0	0	0	0	0	0	0	0	0
93841a8f10ef2fe537729caa50ff3de9_rep;size=22;	x__sub0.01	x__sub0.01	x__sub0.01	x__sub0.01	x__sub0.01	x__sub0.01	x__sub0.01	0	0	0	0	0	0	0	0	0	0	0	0	0	0	0	0	1	0	0	0	0	0	0	0	0	0	0	0	0	0	0	0	0	0	0	0	0	0	0	0	0	0
ad3cc1f23966b122da8b5471e8a66e2e_rep;size=22;	x__sub0.01	x__sub0.01	x__sub0.01	x__sub0.01	x__sub0.01	x__sub0.01	x__sub0.01	0	0	0	0	3	0	0	0	2	0	0	0	1	0	0	0	5	0	0	0	0	0	0	0	2	0	0	0	0	0	0	0	4	0	0	0	0	0	0	0	0	0
c9c8ab0b5f02ed94d001e29e4ed9588e_rep;size=22;	x__sub0.01	x__sub0.01	x__sub0.01	x__sub0.01	x__sub0.01	x__sub0.01	x__sub0.01	0	0	0	0	0	0	0	0	0	0	0	0	0	0	0	0	0	0	0	0	0	0	0	0	0	0	0	0	0	0	0	0	0	0	0	0	0	0	0	0	0	0
2d3be39995136a2567fe2def879ee796_rep;size=22;	x__sub0.01	x__sub0.01	x__sub0.01	x__sub0.01	x__sub0.01	x__sub0.01	x__sub0.01	0	0	0	0	0	0	0	0	0	0	0	0	0	0	0	1	0	0	0	0	0	0	0	0	0	0	0	1	0	0	0	0	0	0	0	0	0	0	0	3	0	0
e727cf78c2aa3f3798c3d6b13ebb82a3_rep;size=22;	x__sub0.01	x__sub0.01	x__sub0.01	x__sub0.01	x__sub0.01	x__sub0.01	x__sub0.01	0	0	0	0	0	0	0	0	2	0	0	0	0	0	0	0	2	0	0	0	2	0	0	0	0	0	0	0	0	0	0	0	0	0	0	0	2	0	0	0	0	0
04694ab170261465be4923e6fbba8604_rep;size=22;	x__sub0.01	x__sub0.01	x__sub0.01	x__sub0.01	x__sub0.01	x__sub0.01	x__sub0.01	0	0	0	0	0	0	0	0	0	0	0	0	0	0	0	0	0	0	0	0	0	0	0	0	0	0	0	0	0	0	0	0	0	0	0	0	0	0	0	0	0	0
75fd9a4efb1138a64367d7c32e16e889_rep;size=22;	x__sub0.01	x__sub0.01	x__sub0.01	x__sub0.01	x__sub0.01	x__sub0.01	x__sub0.01	0	0	0	0	0	0	0	0	0	0	0	0	0	0	0	0	0	0	0	0	0	0	0	0	0	0	0	0	0	0	0	0	0	0	0	0	0	0	0	0	0	0
9eaf8ef2e346962cec09b1b535c2c4de_rep;size=22;	x__sub0.01	x__sub0.01	x__sub0.01	x__sub0.01	x__sub0.01	x__sub0.01	x__sub0.01	0	0	0	0	0	0	0	0	0	0	0	1	0	0	0	0	0	0	0	0	0	0	1	0	0	0	0	0	0	0	0	0	0	0	0	0	0	0	0	0	0	0
dcfafbc5c88bfc126dccf68ba91f85ad_rep;size=22;	x__sub0.01	x__sub0.01	x__sub0.01	x__sub0.01	x__sub0.01	x__sub0.01	x__sub0.01	0	0	0	0	0	0	0	0	4	0	0	0	0	0	0	0	0	0	0	0	2	0	0	0	1	0	0	0	0	0	0	0	0	0	0	0	2	0	0	0	2	0
c3236c651c2d74504e8e12a70fabe2c6_rep;size=21;	x__sub0.01	x__sub0.01	x__sub0.01	x__sub0.01	x__sub0.01	x__sub0.01	x__sub0.01	0	0	0	0	0	0	0	0	0	0	0	0	0	0	0	0	0	0	0	0	0	0	0	0	1	0	0	0	0	0	0	0	0	0	0	0	0	0	0	0	0	0
5a97a71efbd10f3bdfa17260e01fbfac_rep;size=21;	x__sub0.01	x__sub0.01	x__sub0.01	x__sub0.01	x__sub0.01	x__sub0.01	x__sub0.01	0	0	0	0	0	0	0	0	0	0	0	0	0	0	0	0	0	0	0	0	0	0	0	0	0	0	0	0	0	0	0	0	0	0	0	0	0	0	0	0	0	0
755c94083db2571c02ce6488effb17cc_rep;size=21;	x__sub0.01	x__sub0.01	x__sub0.01	x__sub0.01	x__sub0.01	x__sub0.01	x__sub0.01	0	0	0	0	0	0	0	0	2	0	0	0	0	0	0	0	0	0	0	0	0	0	0	0	0	0	0	0	0	0	0	0	0	0	0	0	2	0	0	0	0	0
c4dbd0bc9f24bb1087293e3a6046d76c_rep;size=21;	x__sub0.01	x__sub0.01	x__sub0.01	x__sub0.01	x__sub0.01	x__sub0.01	x__sub0.01	0	0	0	0	0	0	0	0	0	0	0	0	0	0	0	0	0	0	0	0	0	0	0	0	0	0	0	0	0	0	0	0	0	0	0	0	0	0	0	0	0	0
e28579f60d79f29159dd838c21757eac_rep;size=21;	x__sub0.01	x__sub0.01	x__sub0.01	x__sub0.01	x__sub0.01	x__sub0.01	x__sub0.01	0	0	1	0	0	0	0	0	0	0	0	0	1	0	0	0	2	0	0	0	0	0	0	0	0	0	0	0	1	0	0	0	0	0	0	1	0	0	0	0	0	0
0d998e6e81e4858c16e4f059c0f69c9a_rep;size=21;	x__sub0.01	x__sub0.01	x__sub0.01	x__sub0.01	x__sub0.01	x__sub0.01	x__sub0.01	0	0	0	0	1	0	0	0	0	0	0	0	0	0	0	0	0	0	0	0	0	0	0	0	0	0	0	0	0	0	0	0	1	0	0	0	0	0	0	0	0	0
0c0233ee5086fa86df0d102918b8b2c2_rep;size=21;	x__sub0.01	x__sub0.01	x__sub0.01	x__sub0.01	x__sub0.01	x__sub0.01	x__sub0.01	0	0	0	0	0	0	0	0	0	0	0	0	0	0	0	0	0	0	0	0	0	0	0	0	0	0	0	0	0	0	0	0	0	0	0	0	0	0	0	0	0	0
9ea6025a3e79f33806acac567227e7b9_rep;size=21;	x__sub0.01	x__sub0.01	x__sub0.01	x__sub0.01	x__sub0.01	x__sub0.01	x__sub0.01	0	0	0	0	0	0	0	0	0	0	0	0	0	0	0	0	0	0	0	0	0	0	0	0	0	0	0	0	0	0	0	0	0	0	0	0	0	0	0	0	0	0
0f39523ec652a04d2aaf359562efb5e5_rep;size=21;	x__sub0.01	x__sub0.01	x__sub0.01	x__sub0.01	x__sub0.01	x__sub0.01	x__sub0.01	0	0	0	0	0	0	0	0	0	0	0	0	0	0	0	0	0	0	0	0	0	0	0	0	0	0	0	0	0	0	0	0	0	0	0	0	0	0	0	0	2	0
884a0997fa3c8c2b468a9546c9285073_rep;size=21;	x__sub0.01	x__sub0.01	x__sub0.01	x__sub0.01	x__sub0.01	x__sub0.01	x__sub0.01	0	0	0	0	0	0	0	0	0	0	0	0	0	0	0	0	0	0	0	0	0	0	0	0	0	0	0	0	0	0	0	0	0	0	0	0	0	0	0	0	0	0
b34bcbf4f07ad57d7060750a7e838a91_rep;size=21;	x__sub0.01	x__sub0.01	x__sub0.01	x__sub0.01	x__sub0.01	x__sub0.01	x__sub0.01	0	0	0	0	0	0	0	0	0	0	0	0	0	0	0	0	2	0	0	0	0	0	0	0	0	0	0	0	0	0	0	0	0	0	0	0	0	0	0	0	1	0
3a41825e49993ebf875bbfc4d29c5463_rep;size=21;	x__sub0.01	x__sub0.01	x__sub0.01	x__sub0.01	x__sub0.01	x__sub0.01	x__sub0.01	0	0	0	0	0	0	0	0	0	0	0	0	0	0	0	0	0	0	0	0	0	0	0	0	0	0	0	0	0	0	0	0	0	0	0	0	0	0	0	0	0	0
5a96a38b7cd147e25b86d015acb96421_rep;size=21;	x__sub0.01	x__sub0.01	x__sub0.01	x__sub0.01	x__sub0.01	x__sub0.01	x__sub0.01	0	0	0	0	0	0	0	0	0	0	0	0	0	0	0	0	0	0	0	0	0	0	0	0	0	0	0	0	0	0	0	0	0	0	0	0	0	0	0	0	0	0
876199222a76258b88f61a0915f3194f_rep;size=21;	x__sub0.01	x__sub0.01	x__sub0.01	x__sub0.01	x__sub0.01	x__sub0.01	x__sub0.01	0	0	0	0	0	0	0	0	2	0	0	0	2	0	0	0	0	0	0	0	0	0	0	0	0	0	0	0	0	0	0	0	0	0	0	0	0	0	0	0	0	0
c7b2b67185bf550a16eaaaecc195a8bc_rep;size=21;	x__sub0.01	x__sub0.01	x__sub0.01	x__sub0.01	x__sub0.01	x__sub0.01	x__sub0.01	0	0	0	0	1	0	0	0	0	0	0	0	0	0	0	0	0	0	0	0	0	0	0	0	0	0	0	0	0	0	0	0	0	0	0	0	2	0	0	0	0	0
95a920711241460efebf94bff40e7835_rep;size=21;	x__sub0.01	x__sub0.01	x__sub0.01	x__sub0.01	x__sub0.01	x__sub0.01	x__sub0.01	0	0	0	0	0	0	0	0	0	0	0	0	0	0	0	0	0	0	0	0	0	0	0	0	0	0	0	0	0	0	0	1	0	0	0	0	0	0	0	0	0	0
cd8de22ed43cbc6ef6f3798114d098ca_rep;size=21;	x__sub0.01	x__sub0.01	x__sub0.01	x__sub0.01	x__sub0.01	x__sub0.01	x__sub0.01	0	0	0	0	0	0	0	0	0	0	0	0	0	0	0	0	0	0	0	0	1	0	0	0	0	0	0	0	0	0	0	0	0	0	0	0	1	0	0	0	0	0
d6e90c72057ca944e3d016e1b43ffa57_rep;size=21;	x__sub0.01	x__sub0.01	x__sub0.01	x__sub0.01	x__sub0.01	x__sub0.01	x__sub0.01	0	0	0	0	0	0	0	0	0	0	0	0	0	0	0	0	0	0	0	0	0	0	0	0	0	0	0	0	0	0	0	0	0	0	0	0	0	0	0	0	0	0
f255000846f69d76462dd89f54ee7084_rep;size=21;	x__sub0.01	x__sub0.01	x__sub0.01	x__sub0.01	x__sub0.01	x__sub0.01	x__sub0.01	0	0	0	0	0	0	0	0	0	0	0	0	0	0	0	0	0	0	0	0	0	0	0	0	0	0	0	0	2	0	0	0	0	0	0	0	3	0	0	0	0	0
b18ac900af47f361431e47148a458dbd_rep;size=21;	x__sub0.01	x__sub0.01	x__sub0.01	x__sub0.01	x__sub0.01	x__sub0.01	x__sub0.01	0	0	0	0	0	0	0	0	0	0	0	0	0	0	0	0	0	0	0	0	0	0	0	1	0	0	0	0	0	0	0	0	0	0	0	0	0	0	0	0	0	0
c70c7c9ed8855bfccfaee5809e22b71d_rep;size=21;	x__sub0.01	x__sub0.01	x__sub0.01	x__sub0.01	x__sub0.01	x__sub0.01	x__sub0.01	0	0	0	0	0	0	0	0	0	0	0	0	0	0	0	0	0	0	0	0	0	0	0	0	1	0	0	0	0	0	0	0	0	0	0	0	0	0	0	0	0	0
23f8d77e0da2129f8b93b5ca894b5771_rep;size=21;	x__sub0.01	x__sub0.01	x__sub0.01	x__sub0.01	x__sub0.01	x__sub0.01	x__sub0.01	0	0	0	0	0	0	0	0	0	0	0	0	0	0	0	0	0	0	0	0	0	0	0	0	0	0	0	0	0	0	0	0	0	0	0	0	1	0	0	0	0	0
9c181eb73e8e9e2c550e2f296404019f_rep;size=21;	x__sub0.01	x__sub0.01	x__sub0.01	x__sub0.01	x__sub0.01	x__sub0.01	x__sub0.01	0	0	0	0	0	0	1	1	0	2	0	0	0	0	0	0	0	0	1	4	0	0	1	1	0	0	0	0	0	0	1	0	0	0	0	1	0	1	0	0	0	0
e612bd1de213f9e2ba29fca723616b39_rep;size=21;	x__sub0.01	x__sub0.01	x__sub0.01	x__sub0.01	x__sub0.01	x__sub0.01	x__sub0.01	0	0	1	0	0	0	0	0	0	0	0	0	0	0	0	0	0	0	0	0	0	0	0	0	0	0	0	0	0	0	0	0	0	1	0	0	0	0	0	1	0	0
6d9f3c53f6cca83b5b3d7dd7597d222a_rep;size=21;	x__sub0.01	x__sub0.01	x__sub0.01	x__sub0.01	x__sub0.01	x__sub0.01	x__sub0.01	0	0	0	0	0	0	0	0	0	0	0	0	0	0	0	0	0	0	0	0	0	0	0	0	0	0	0	0	0	0	0	0	0	0	0	0	0	0	0	0	0	0
c60b31efd446926670cc4ed66a033a52_rep;size=21;	x__sub0.01	x__sub0.01	x__sub0.01	x__sub0.01	x__sub0.01	x__sub0.01	x__sub0.01	0	0	0	0	0	0	0	0	0	0	0	0	0	0	0	0	0	0	2	0	0	0	0	0	0	0	0	2	0	0	0	1	0	0	0	0	0	0	0	0	0	0
0caadff25632b668965b14c8420a18ad_rep;size=21;	x__sub0.01	x__sub0.01	x__sub0.01	x__sub0.01	x__sub0.01	x__sub0.01	x__sub0.01	0	0	0	0	0	0	0	0	1	0	0	0	3	0	0	0	0	0	0	0	0	0	0	0	0	0	0	0	0	0	0	0	0	0	0	0	0	0	0	0	0	0
1deec9a7432af9236dad6e862cc704eb_rep;size=21;	x__sub0.01	x__sub0.01	x__sub0.01	x__sub0.01	x__sub0.01	x__sub0.01	x__sub0.01	0	0	0	0	0	0	0	0	0	0	0	0	0	0	0	0	0	0	0	0	0	0	0	0	0	0	0	0	0	0	0	0	0	0	0	0	0	0	0	0	0	0
828a651e0e104001e7150dfeb7a11420_rep;size=21;	x__sub0.01	x__sub0.01	x__sub0.01	x__sub0.01	x__sub0.01	x__sub0.01	x__sub0.01	0	0	0	0	0	0	0	0	0	0	0	0	0	0	0	0	0	0	0	0	0	0	0	0	0	0	0	0	0	0	0	0	0	0	0	0	0	0	0	0	0	0
d684515330a444dd96d67c7de200f652_rep;size=21;	x__sub0.01	x__sub0.01	x__sub0.01	x__sub0.01	x__sub0.01	x__sub0.01	x__sub0.01	0	0	0	0	0	0	0	0	0	0	0	0	0	0	0	0	0	0	0	0	0	0	0	0	0	0	0	0	0	0	0	0	0	0	0	0	0	0	0	0	0	0
53d0da0e53ee17589a384c95c9420032_rep;size=21;	x__sub0.01	x__sub0.01	x__sub0.01	x__sub0.01	x__sub0.01	x__sub0.01	x__sub0.01	0	0	0	0	0	0	0	0	1	0	0	0	0	0	0	0	0	0	0	0	0	0	0	0	0	0	0	0	1	0	0	0	1	0	0	0	0	0	0	0	2	0
6aeb7aa14ad46f70412dd0159797b700_rep;size=21;	x__sub0.01	x__sub0.01	x__sub0.01	x__sub0.01	x__sub0.01	x__sub0.01	x__sub0.01	0	0	0	0	0	0	0	0	0	0	0	0	0	0	0	0	0	0	0	0	0	0	0	0	0	0	0	0	0	0	0	0	0	0	0	0	0	0	0	0	0	0
73f21cc0a7c8d783ae7b299cde700c5e_rep;size=21;	x__sub0.01	x__sub0.01	x__sub0.01	x__sub0.01	x__sub0.01	x__sub0.01	x__sub0.01	0	0	0	0	0	0	0	0	0	0	2	1	0	0	2	3	0	0	1	0	0	0	0	0	0	0	2	2	0	0	0	0	0	0	0	0	0	0	0	1	0	0
b44986149d97d193e640abc64222fb0d_rep;size=21;	x__sub0.01	x__sub0.01	x__sub0.01	x__sub0.01	x__sub0.01	x__sub0.01	x__sub0.01	0	0	0	0	0	0	0	0	0	0	0	0	0	0	0	0	0	0	0	0	0	0	0	0	0	0	0	0	0	0	0	0	0	0	0	0	0	0	0	0	0	0
d9a76fdedf5d933e66287d46aacc799e_rep;size=21;	x__sub0.01	x__sub0.01	x__sub0.01	x__sub0.01	x__sub0.01	x__sub0.01	x__sub0.01	0	0	0	0	0	0	0	0	0	0	0	0	0	0	1	2	0	0	2	1	0	0	0	0	0	0	1	3	0	1	0	0	0	0	0	0	0	0	0	1	0	0
2ded915a8040722a574dc464d111e615_rep;size=21;	x__sub0.01	x__sub0.01	x__sub0.01	x__sub0.01	x__sub0.01	x__sub0.01	x__sub0.01	0	0	0	0	0	0	0	0	0	0	0	0	0	0	0	0	0	0	0	0	0	0	0	0	0	0	0	0	0	0	0	0	0	0	0	0	0	0	0	0	0	0
f07892091427f6e5d67a19994fc3a2a2_rep;size=21;	x__sub0.01	x__sub0.01	x__sub0.01	x__sub0.01	x__sub0.01	x__sub0.01	x__sub0.01	0	0	1	0	0	0	0	2	0	0	1	2	0	0	0	0	0	0	0	0	0	0	0	0	0	0	2	0	0	0	0	0	0	0	0	0	0	0	0	1	0	0
54ed945746c6a5c8998371cab3fb88e3_rep;size=21;	x__sub0.01	x__sub0.01	x__sub0.01	x__sub0.01	x__sub0.01	x__sub0.01	x__sub0.01	0	0	0	0	0	0	0	0	0	0	0	0	0	0	0	0	0	0	0	0	0	0	0	0	0	0	0	0	0	0	0	0	0	0	0	0	0	0	0	0	0	0
4a676cbd3bf803c33911fc0c0b0f11c1_rep;size=21;	x__sub0.01	x__sub0.01	x__sub0.01	x__sub0.01	x__sub0.01	x__sub0.01	x__sub0.01	0	0	0	0	0	0	0	0	0	0	0	0	0	0	0	0	0	0	0	0	0	0	0	0	0	0	0	0	0	0	0	0	0	0	0	0	0	0	0	0	0	0
a1a359e0b8852d0ef5ec0192fd6b1de0_rep;size=21;	x__sub0.01	x__sub0.01	x__sub0.01	x__sub0.01	x__sub0.01	x__sub0.01	x__sub0.01	0	0	1	0	0	0	0	0	0	0	0	0	0	0	0	0	0	0	0	0	0	0	0	0	0	0	0	0	0	0	0	0	0	0	0	0	0	0	0	0	0	0
7ae4e7deffa2a7265675444966379be2_rep;size=20;	x__sub0.01	x__sub0.01	x__sub0.01	x__sub0.01	x__sub0.01	x__sub0.01	x__sub0.01	0	0	0	0	0	0	0	0	0	0	0	0	0	0	0	0	0	0	0	0	0	0	0	0	0	0	0	0	0	0	0	0	0	0	0	0	0	0	0	0	0	0
5b9236e8d2a1ccb8ba1a888e8039aa55_rep;size=20;	x__sub0.01	x__sub0.01	x__sub0.01	x__sub0.01	x__sub0.01	x__sub0.01	x__sub0.01	0	0	0	0	0	0	0	0	0	0	0	0	0	0	0	0	0	0	0	0	0	0	0	0	0	0	0	0	7	0	0	0	0	0	0	0	0	0	0	0	0	0
17aaaa753c8ddc573e18734b3a40d7b4_rep;size=20;	x__sub0.01	x__sub0.01	x__sub0.01	x__sub0.01	x__sub0.01	x__sub0.01	x__sub0.01	0	0	0	0	0	0	0	0	0	0	0	0	0	0	0	0	0	0	0	0	0	0	0	0	0	0	0	0	0	0	0	0	0	0	0	0	0	0	0	0	0	0
b0476353899ee39a07b1dc656760b776_rep;size=20;	x__sub0.01	x__sub0.01	x__sub0.01	x__sub0.01	x__sub0.01	x__sub0.01	x__sub0.01	0	0	0	0	0	0	0	0	0	0	0	0	0	0	0	0	0	0	0	0	0	0	0	0	0	0	0	0	0	0	0	0	0	0	0	0	0	0	0	0	0	0
8d72fa8595b221302219671d3b635397_rep;size=20;	x__sub0.01	x__sub0.01	x__sub0.01	x__sub0.01	x__sub0.01	x__sub0.01	x__sub0.01	0	0	0	0	0	0	0	0	1	0	0	0	0	0	0	0	0	0	0	0	0	0	0	0	0	0	0	0	0	0	0	0	0	0	0	0	0	0	0	0	0	0
98e4e3d8471abebbc1d9b4e461c9b491_rep;size=20;	x__sub0.01	x__sub0.01	x__sub0.01	x__sub0.01	x__sub0.01	x__sub0.01	x__sub0.01	0	0	0	0	0	0	0	0	0	0	0	0	0	0	0	0	0	0	0	0	0	0	0	0	0	0	0	0	0	0	0	0	0	0	0	0	0	0	0	0	0	0
f65f48320d8c3273a0bdaebba12bb54f_rep;size=20;	x__sub0.01	x__sub0.01	x__sub0.01	x__sub0.01	x__sub0.01	x__sub0.01	x__sub0.01	0	0	0	0	0	0	0	0	0	0	0	0	0	0	0	0	0	0	0	0	0	0	0	0	0	0	0	0	0	0	0	0	0	0	0	0	0	0	0	0	0	0
6dba362332090e8689100ee4a1a7d482_rep;size=20;	x__sub0.01	x__sub0.01	x__sub0.01	x__sub0.01	x__sub0.01	x__sub0.01	x__sub0.01	0	0	0	0	0	0	0	0	0	0	0	0	2	0	0	0	0	0	0	0	0	0	0	0	1	0	0	0	0	0	0	0	0	0	0	0	0	0	0	0	0	0
937dafae8b766ada625002f343515f0d_rep;size=20;	x__sub0.01	x__sub0.01	x__sub0.01	x__sub0.01	x__sub0.01	x__sub0.01	x__sub0.01	0	0	0	0	0	0	0	0	0	0	0	0	0	0	0	0	0	0	0	0	0	0	0	0	0	0	0	0	0	0	0	0	0	0	0	0	0	0	0	0	3	0
d09f011c6f2503471339ffffe9847a0f_rep;size=20;	x__sub0.01	x__sub0.01	x__sub0.01	x__sub0.01	x__sub0.01	x__sub0.01	x__sub0.01	0	0	0	0	0	0	0	0	0	0	0	0	0	0	0	0	0	0	0	0	0	0	0	0	0	0	0	0	0	0	0	0	0	0	0	0	0	0	0	0	0	0
2c4248cfdc53cccb81409a897702de7d_rep;size=20;	x__sub0.01	x__sub0.01	x__sub0.01	x__sub0.01	x__sub0.01	x__sub0.01	x__sub0.01	0	0	0	0	0	0	0	0	0	0	0	0	0	0	0	0	0	0	0	0	0	0	0	0	0	0	0	0	0	0	0	0	0	0	0	0	0	0	0	0	0	0
58a29ceb51257737575789462c915378_rep;size=20;	x__sub0.01	x__sub0.01	x__sub0.01	x__sub0.01	x__sub0.01	x__sub0.01	x__sub0.01	0	0	0	0	0	0	0	0	0	0	0	0	0	0	0	0	0	0	0	0	0	0	0	0	0	0	0	0	0	0	0	0	0	0	0	0	0	0	0	0	0	0
8b3c6f0cc2ca4ba8cce73c3b9decc776_rep;size=20;	x__sub0.01	x__sub0.01	x__sub0.01	x__sub0.01	x__sub0.01	x__sub0.01	x__sub0.01	0	0	0	0	0	0	0	0	0	0	0	0	0	0	0	0	0	0	0	0	0	0	0	0	0	0	0	0	0	0	0	0	0	0	0	0	0	0	0	0	0	0
dcaa86074b0580fb2df51267a79f6143_rep;size=20;	x__sub0.01	x__sub0.01	x__sub0.01	x__sub0.01	x__sub0.01	x__sub0.01	x__sub0.01	0	0	0	0	1	0	0	0	0	0	0	0	0	0	0	0	0	0	0	0	0	0	0	0	0	0	0	0	0	0	0	0	0	0	0	0	0	0	0	0	0	0
205573a8980f8feb77ac71b0a2a277e5_rep;size=20;	x__sub0.01	x__sub0.01	x__sub0.01	x__sub0.01	x__sub0.01	x__sub0.01	x__sub0.01	1	0	0	0	0	0	0	0	0	0	0	0	0	0	0	0	0	0	0	0	0	0	0	0	0	0	0	0	0	0	0	0	0	0	0	0	1	0	0	0	0	0
238dd8abc3d76207bb83fef04a8b4821_rep;size=20;	x__sub0.01	x__sub0.01	x__sub0.01	x__sub0.01	x__sub0.01	x__sub0.01	x__sub0.01	0	0	0	0	0	0	0	0	0	0	0	0	0	0	0	0	0	0	0	0	0	0	0	0	0	0	0	0	0	0	0	0	0	0	0	0	0	0	0	0	0	0
63c5d9a288a934fd449e2d9f50f0cb83_rep;size=20;	x__sub0.01	x__sub0.01	x__sub0.01	x__sub0.01	x__sub0.01	x__sub0.01	x__sub0.01	0	0	0	0	0	0	0	1	0	0	0	0	0	0	0	0	0	0	0	1	0	0	0	0	0	0	0	2	0	0	0	0	0	0	1	0	0	0	0	0	0	0
fd86c0e5e264ed78e3774d34722a2541_rep;size=20;	x__sub0.01	x__sub0.01	x__sub0.01	x__sub0.01	x__sub0.01	x__sub0.01	x__sub0.01	0	0	0	0	0	0	0	0	0	0	0	0	0	0	0	4	0	0	1	0	0	0	0	0	0	0	3	1	0	0	1	1	0	0	0	0	0	0	0	1	0	0
1e49d0ec524af1b3bf24317916d8943e_rep;size=20;	x__sub0.01	x__sub0.01	x__sub0.01	x__sub0.01	x__sub0.01	x__sub0.01	x__sub0.01	0	0	0	0	0	0	0	0	0	0	0	0	0	0	0	0	0	0	0	0	0	0	0	0	0	0	0	0	0	0	0	0	0	0	0	0	0	0	0	0	0	0
3c627fbc76b64d98b93b22a9b6191e3c_rep;size=20;	x__sub0.01	x__sub0.01	x__sub0.01	x__sub0.01	x__sub0.01	x__sub0.01	x__sub0.01	0	0	0	0	0	0	0	0	0	0	0	0	0	0	0	0	0	0	0	0	0	0	0	0	0	0	0	0	0	0	0	0	0	0	0	0	0	0	0	1	0	0
7dc14dcef5e27905b0c1e504fb36ca18_rep;size=20;	x__sub0.01	x__sub0.01	x__sub0.01	x__sub0.01	x__sub0.01	x__sub0.01	x__sub0.01	1	0	0	0	2	0	0	0	1	0	0	0	0	0	0	0	0	0	0	0	0	0	0	0	1	0	0	0	0	0	0	0	2	0	0	0	2	0	0	0	1	0
8f4c996af239de54ac6e2f986502853e_rep;size=20;	x__sub0.01	x__sub0.01	x__sub0.01	x__sub0.01	x__sub0.01	x__sub0.01	x__sub0.01	0	0	0	0	1	0	0	0	0	0	0	0	0	0	0	0	0	0	0	0	0	0	0	0	0	0	0	0	0	0	0	0	0	0	0	0	0	0	0	0	0	0
d41d3b1fb48c28f45e4a2bd875f5103c_rep;size=20;	x__sub0.01	x__sub0.01	x__sub0.01	x__sub0.01	x__sub0.01	x__sub0.01	x__sub0.01	0	0	0	0	0	0	0	0	0	0	0	0	0	0	0	0	0	0	0	0	0	0	0	0	0	0	0	0	0	0	0	0	0	0	0	0	0	0	0	0	0	0
27b92a4c7cf3c6481d72b3ff643a99cc_rep;size=20;	x__sub0.01	x__sub0.01	x__sub0.01	x__sub0.01	x__sub0.01	x__sub0.01	x__sub0.01	0	0	0	0	0	0	0	0	1	0	0	0	1	0	0	0	0	0	0	0	1	0	0	0	0	0	0	0	0	0	0	0	0	0	0	0	0	0	0	0	0	0
751d8cae397fb9d1bf1555d914a57fe6_rep;size=20;	x__sub0.01	x__sub0.01	x__sub0.01	x__sub0.01	x__sub0.01	x__sub0.01	x__sub0.01	0	0	0	0	0	0	0	0	0	0	0	0	0	0	0	0	0	0	0	0	0	0	0	0	0	0	0	0	0	0	0	0	0	0	0	0	0	0	0	0	0	0
7421d79addfee0598bd3fb47087d8833_rep;size=20;	x__sub0.01	x__sub0.01	x__sub0.01	x__sub0.01	x__sub0.01	x__sub0.01	x__sub0.01	0	0	3	1	0	0	0	0	0	0	2	1	0	0	1	1	0	0	0	0	0	0	0	0	0	0	0	1	0	0	0	2	0	0	0	0	0	0	0	0	0	0
50e1b0f9ad6865f41c0a59bddfd23c52_rep;size=20;	x__sub0.01	x__sub0.01	x__sub0.01	x__sub0.01	x__sub0.01	x__sub0.01	x__sub0.01	0	0	0	0	0	0	0	0	0	0	0	0	0	0	0	0	0	0	0	0	0	0	0	0	0	0	0	0	0	0	0	0	0	0	0	0	0	0	0	0	0	0
3772fea15c417edfb7235db02d9eb282_rep;size=19;	x__sub0.01	x__sub0.01	x__sub0.01	x__sub0.01	x__sub0.01	x__sub0.01	x__sub0.01	0	0	0	0	9	0	0	0	0	0	0	0	1	0	0	0	0	0	0	0	0	0	0	0	0	0	0	0	0	0	0	0	0	0	0	0	0	0	0	0	0	0
4b485468200f00ad4ef93af437a29ff9_rep;size=19;	x__sub0.01	x__sub0.01	x__sub0.01	x__sub0.01	x__sub0.01	x__sub0.01	x__sub0.01	0	0	0	0	1	0	0	0	3	0	0	0	2	0	0	0	2	0	0	0	2	0	0	0	0	0	0	0	1	0	0	0	0	0	0	0	0	0	0	0	1	0
7b00ebe4f5ca3c595a58cf0cbc7abc10_rep;size=19;	x__sub0.01	x__sub0.01	x__sub0.01	x__sub0.01	x__sub0.01	x__sub0.01	x__sub0.01	1	0	0	0	0	0	0	0	1	0	0	0	0	0	0	0	0	0	0	0	0	0	0	0	1	0	0	0	0	0	0	0	1	0	0	0	0	0	0	0	0	0
bd65f45e33a0c145df15f9cd4bb46635_rep;size=19;	x__sub0.01	x__sub0.01	x__sub0.01	x__sub0.01	x__sub0.01	x__sub0.01	x__sub0.01	0	0	0	0	0	0	0	0	1	0	0	0	1	0	0	0	0	0	0	0	0	0	0	0	6	0	0	0	0	0	0	0	0	0	0	0	0	0	0	0	0	0
00b1ad7d26685fefe4e01c6a49407f59_rep;size=19;	x__sub0.01	x__sub0.01	x__sub0.01	x__sub0.01	x__sub0.01	x__sub0.01	x__sub0.01	0	0	0	0	0	0	0	0	0	0	0	0	0	0	0	0	0	0	0	0	1	0	0	0	0	0	0	0	0	0	0	0	0	0	0	0	0	0	0	0	0	0
43c363512c16d49b08986241aa36d59f_rep;size=19;	x__sub0.01	x__sub0.01	x__sub0.01	x__sub0.01	x__sub0.01	x__sub0.01	x__sub0.01	0	0	0	0	0	0	0	0	0	0	0	0	2	0	0	0	0	0	0	0	0	0	0	0	0	0	0	0	0	0	0	0	0	0	0	0	0	0	0	0	0	0
47ed63e5ba9a22d327d7bd266f6f868f_rep;size=19;	x__sub0.01	x__sub0.01	x__sub0.01	x__sub0.01	x__sub0.01	x__sub0.01	x__sub0.01	0	0	0	0	0	0	0	0	0	0	0	0	0	0	0	0	0	0	0	0	0	0	0	0	0	0	0	0	0	0	0	0	0	0	0	0	0	0	0	0	0	0
529d26adc9058c00562df071f6604a58_rep;size=19;	x__sub0.01	x__sub0.01	x__sub0.01	x__sub0.01	x__sub0.01	x__sub0.01	x__sub0.01	0	0	0	0	1	0	0	0	0	0	0	0	0	0	0	0	0	0	0	0	0	0	0	0	0	0	0	0	0	0	0	0	1	0	0	0	0	0	0	0	0	0
6d9580e8ac79a09bd5976c3ad02f7eba_rep;size=19;	x__sub0.01	x__sub0.01	x__sub0.01	x__sub0.01	x__sub0.01	x__sub0.01	x__sub0.01	0	0	0	0	0	0	0	0	0	0	0	0	0	0	0	0	0	0	0	0	0	0	0	0	0	0	0	0	0	0	0	0	0	0	0	0	0	0	0	0	0	0
76808148124939ca211f510250bc7b9c_rep;size=19;	x__sub0.01	x__sub0.01	x__sub0.01	x__sub0.01	x__sub0.01	x__sub0.01	x__sub0.01	0	0	0	0	0	0	0	0	0	0	0	0	0	0	0	0	0	0	0	0	0	0	0	0	19	0	0	0	0	0	0	0	0	0	0	0	0	0	0	0	0	0
84b4019b3daf8f35f0b873438b9a5dee_rep;size=19;	x__sub0.01	x__sub0.01	x__sub0.01	x__sub0.01	x__sub0.01	x__sub0.01	x__sub0.01	0	0	0	0	0	0	0	0	0	0	0	0	0	0	0	0	0	0	0	0	1	0	0	0	0	0	0	0	0	0	0	0	0	0	0	0	0	0	0	0	0	0
943157aa06dad1fc942bcf79bf13915b_rep;size=19;	x__sub0.01	x__sub0.01	x__sub0.01	x__sub0.01	x__sub0.01	x__sub0.01	x__sub0.01	0	0	0	0	0	0	0	0	0	0	0	0	0	0	0	0	0	0	0	0	0	0	0	0	0	0	0	0	0	0	0	0	0	0	0	0	0	0	0	0	0	0
98cca586f50e513bf996a201e7c3fa83_rep;size=19;	x__sub0.01	x__sub0.01	x__sub0.01	x__sub0.01	x__sub0.01	x__sub0.01	x__sub0.01	0	0	0	0	0	0	0	0	0	0	0	0	2	0	0	0	0	0	0	0	0	0	0	0	0	0	0	0	1	0	0	0	0	0	0	0	1	0	0	0	0	0
a460ee8e629d9de42cdfbe250c8aed7b_rep;size=19;	x__sub0.01	x__sub0.01	x__sub0.01	x__sub0.01	x__sub0.01	x__sub0.01	x__sub0.01	0	0	0	0	0	0	0	0	0	0	0	0	0	0	0	0	0	0	0	0	1	0	0	0	0	0	0	0	0	0	0	0	1	0	0	0	0	0	0	0	0	0
dcf2f2e21384971e3b332d0a5aa78bea_rep;size=19;	x__sub0.01	x__sub0.01	x__sub0.01	x__sub0.01	x__sub0.01	x__sub0.01	x__sub0.01	0	0	0	0	0	0	0	0	0	0	0	0	0	0	0	0	0	0	0	0	0	0	0	0	0	0	0	0	0	0	0	0	4	0	0	0	3	0	0	0	0	0
4127826256eaebb338094fae6b2fb091_rep;size=19;	x__sub0.01	x__sub0.01	x__sub0.01	x__sub0.01	x__sub0.01	x__sub0.01	x__sub0.01	0	0	0	0	0	0	0	1	0	0	0	0	0	0	0	0	0	0	0	0	0	0	0	1	0	0	0	0	0	0	0	0	0	0	0	2	0	0	1	0	0	0
acf0c952e981b3e32e9eda43b1380d7c_rep;size=19;	x__sub0.01	x__sub0.01	x__sub0.01	x__sub0.01	x__sub0.01	x__sub0.01	x__sub0.01	0	0	0	0	0	0	0	0	0	0	0	0	0	0	0	0	0	0	0	0	0	0	0	0	0	0	0	0	0	0	0	0	0	0	0	0	0	0	0	0	0	0
f7a6ac53c86ba64a600788445abd10e3_rep;size=19;	x__sub0.01	x__sub0.01	x__sub0.01	x__sub0.01	x__sub0.01	x__sub0.01	x__sub0.01	0	0	0	0	1	0	0	0	0	0	0	0	0	0	0	0	0	0	0	0	0	0	0	0	0	0	0	0	0	0	0	0	0	0	0	0	0	0	0	0	3	0
3c4fc97d3f902c42023f3fe250579c17_rep;size=19;	x__sub0.01	x__sub0.01	x__sub0.01	x__sub0.01	x__sub0.01	x__sub0.01	x__sub0.01	0	0	0	0	2	0	0	0	0	0	0	0	4	0	0	0	0	0	0	0	1	0	0	0	0	0	0	0	1	0	0	0	1	0	0	0	0	0	0	0	0	0
c04ddce2e54ddc3fea140b739dd4f9c1_rep;size=19;	x__sub0.01	x__sub0.01	x__sub0.01	x__sub0.01	x__sub0.01	x__sub0.01	x__sub0.01	0	0	0	0	0	0	0	0	0	0	0	0	0	0	0	0	1	0	0	0	0	0	0	0	0	0	0	0	0	0	0	0	0	0	0	0	0	0	0	0	0	0
d26e10329e42cd60ca41b43217cba0d6_rep;size=19;	x__sub0.01	x__sub0.01	x__sub0.01	x__sub0.01	x__sub0.01	x__sub0.01	x__sub0.01	1	0	0	0	1	0	0	0	0	0	0	0	0	0	0	0	0	0	0	0	0	0	0	0	0	0	0	0	0	0	0	0	0	0	0	0	0	0	0	0	0	0
9b6ee587cb87b8b192e2d3fba75ac0be_rep;size=19;	x__sub0.01	x__sub0.01	x__sub0.01	x__sub0.01	x__sub0.01	x__sub0.01	x__sub0.01	0	0	0	0	0	0	0	0	0	0	0	0	0	0	0	0	0	0	0	0	0	0	0	0	0	0	0	0	0	0	0	0	0	0	0	0	0	0	0	0	15	0
2ced81ee97e68f3a0c1a6377ddd5e82e_rep;size=19;	x__sub0.01	x__sub0.01	x__sub0.01	x__sub0.01	x__sub0.01	x__sub0.01	x__sub0.01	0	0	0	0	0	0	0	0	0	0	0	0	0	0	0	0	0	0	0	0	0	0	0	0	0	0	0	0	0	0	0	0	0	0	0	0	0	0	0	0	0	0
805a02682d1ea5a6e1f8ddfad599e1a6_rep;size=19;	x__sub0.01	x__sub0.01	x__sub0.01	x__sub0.01	x__sub0.01	x__sub0.01	x__sub0.01	0	0	0	0	0	0	0	0	0	0	0	0	0	0	0	0	0	0	0	0	0	0	0	0	0	0	0	0	0	0	0	0	0	0	0	0	0	0	0	0	0	0
11a528c90cb4e5ca967def42888b6a1d_rep;size=19;	x__sub0.01	x__sub0.01	x__sub0.01	x__sub0.01	x__sub0.01	x__sub0.01	x__sub0.01	0	0	0	0	0	0	0	0	0	0	0	0	0	0	0	0	0	0	0	0	0	0	0	0	0	0	0	0	1	0	0	0	1	0	0	0	0	0	0	0	0	0
374c9421f8611532cf4240ec3aa6fc36_rep;size=19;	x__sub0.01	x__sub0.01	x__sub0.01	x__sub0.01	x__sub0.01	x__sub0.01	x__sub0.01	0	0	0	0	0	0	0	0	0	0	0	0	0	0	0	0	0	0	0	0	0	0	0	0	0	0	0	0	0	0	0	0	0	0	0	0	0	0	0	0	0	0
85af8ae828552ef51877607628ce5be2_rep;size=19;	x__sub0.01	x__sub0.01	x__sub0.01	x__sub0.01	x__sub0.01	x__sub0.01	x__sub0.01	0	0	0	0	0	1	0	0	0	0	0	0	0	0	0	0	0	0	0	0	0	0	0	0	0	0	0	0	0	0	0	0	0	0	0	0	0	0	0	0	0	0
9fcfbb2840c69e2161e3cd94440b099d_rep;size=19;	x__sub0.01	x__sub0.01	x__sub0.01	x__sub0.01	x__sub0.01	x__sub0.01	x__sub0.01	0	0	0	0	0	0	0	0	2	0	0	0	0	0	0	0	0	0	0	0	7	0	0	0	2	0	0	0	0	0	0	0	0	0	0	0	0	0	0	0	1	0
551c06b54cd2250cf0070e0d9441cd52_rep;size=19;	x__sub0.01	x__sub0.01	x__sub0.01	x__sub0.01	x__sub0.01	x__sub0.01	x__sub0.01	0	0	0	0	0	0	0	0	0	0	0	0	0	0	0	1	0	0	0	0	0	0	0	0	0	0	0	0	0	0	0	0	0	0	0	0	0	0	0	0	0	0
55767b176d24f0514ca89e8b58bf8feb_rep;size=19;	x__sub0.01	x__sub0.01	x__sub0.01	x__sub0.01	x__sub0.01	x__sub0.01	x__sub0.01	0	0	0	0	0	0	0	0	0	0	0	0	0	0	0	0	0	0	0	0	0	0	0	0	0	0	0	0	0	0	0	0	0	0	0	0	0	0	0	0	0	0
890981ae1d94dbe21a8e6e7643a4d80c_rep;size=19;	x__sub0.01	x__sub0.01	x__sub0.01	x__sub0.01	x__sub0.01	x__sub0.01	x__sub0.01	0	0	0	0	0	0	0	0	0	0	0	0	0	0	0	0	0	0	0	0	0	0	0	0	4	0	0	0	0	0	0	0	0	0	0	0	0	0	0	0	0	0
3c0ccd70f20118476eab6d10bbfe8caf_rep;size=19;	x__sub0.01	x__sub0.01	x__sub0.01	x__sub0.01	x__sub0.01	x__sub0.01	x__sub0.01	0	0	0	0	0	0	0	0	0	0	0	0	0	0	0	0	0	0	0	0	0	0	0	0	0	0	0	0	0	0	0	0	0	0	0	0	0	0	0	0	0	0
63e4689b57d235788f3c354bd9f719da_rep;size=19;	x__sub0.01	x__sub0.01	x__sub0.01	x__sub0.01	x__sub0.01	x__sub0.01	x__sub0.01	0	0	1	0	0	0	0	1	0	0	1	0	0	0	0	0	0	0	0	1	0	0	1	1	0	0	0	0	0	0	0	0	0	0	1	0	0	0	1	0	0	0
a691a43730baff946d776ca4be9ddbaa_rep;size=19;	x__sub0.01	x__sub0.01	x__sub0.01	x__sub0.01	x__sub0.01	x__sub0.01	x__sub0.01	0	0	0	1	0	0	0	0	0	0	0	0	0	0	1	0	0	0	0	0	0	0	0	0	0	0	0	3	0	0	0	0	0	0	0	0	0	0	0	1	0	0
e1aa8762683578fbcbbb1baea350630a_rep;size=19;	x__sub0.01	x__sub0.01	x__sub0.01	x__sub0.01	x__sub0.01	x__sub0.01	x__sub0.01	0	0	0	0	0	0	0	0	0	0	0	0	0	0	0	0	0	0	0	0	0	0	0	0	0	0	0	0	0	0	0	0	0	0	0	0	0	0	0	0	0	0
39d72eb1f9e8f95c224936b7b607b45e_rep;size=19;	x__sub0.01	x__sub0.01	x__sub0.01	x__sub0.01	x__sub0.01	x__sub0.01	x__sub0.01	0	0	0	0	0	0	0	0	0	0	0	0	0	0	0	0	0	0	0	0	0	0	0	0	0	0	0	0	0	0	0	0	0	0	0	0	0	0	0	0	0	0
64cd3b1739d3224a6d517dfa8b0fe0f0_rep;size=19;	x__sub0.01	x__sub0.01	x__sub0.01	x__sub0.01	x__sub0.01	x__sub0.01	x__sub0.01	2	0	0	0	0	0	0	0	0	0	0	0	0	0	0	0	0	0	0	0	0	0	0	0	0	0	0	0	0	0	0	0	0	0	0	0	0	0	0	0	2	0
07b4f7ffc3f9ab36e84537e329e6f78d_rep;size=19;	x__sub0.01	x__sub0.01	x__sub0.01	x__sub0.01	x__sub0.01	x__sub0.01	x__sub0.01	0	0	0	0	0	0	0	0	0	0	0	0	0	0	0	0	0	0	0	0	0	0	0	0	0	0	0	0	0	0	0	0	0	0	0	0	0	0	0	0	0	0
6caa78fe83eb57ded028496e18c226bb_rep;size=19;	x__sub0.01	x__sub0.01	x__sub0.01	x__sub0.01	x__sub0.01	x__sub0.01	x__sub0.01	0	0	0	0	0	0	0	0	0	0	0	0	0	0	0	0	0	0	0	0	0	0	0	0	0	0	0	0	0	0	0	0	0	0	0	0	0	0	0	0	0	0
ccc6209b8cd1091953c5eaf14242e324_rep;size=19;	x__sub0.01	x__sub0.01	x__sub0.01	x__sub0.01	x__sub0.01	x__sub0.01	x__sub0.01	0	0	0	0	0	0	0	0	0	0	0	0	0	0	0	0	0	0	0	0	0	0	0	0	0	0	0	0	0	0	0	0	0	0	0	0	0	0	0	0	0	0
349cf32b769e1fda5de28141972f3393_rep;size=19;	x__sub0.01	x__sub0.01	x__sub0.01	x__sub0.01	x__sub0.01	x__sub0.01	x__sub0.01	0	0	0	1	0	0	0	0	0	0	0	0	0	0	0	0	0	0	0	0	0	0	0	0	0	0	0	0	0	0	0	0	0	0	0	0	0	0	0	0	0	0
4c12c1ab0ad4a66b28563e82dd3525e0_rep;size=19;	x__sub0.01	x__sub0.01	x__sub0.01	x__sub0.01	x__sub0.01	x__sub0.01	x__sub0.01	0	0	0	0	0	0	0	0	0	0	0	0	0	0	0	0	0	0	0	0	0	0	0	0	0	0	0	0	0	0	0	0	0	0	0	0	0	0	0	0	0	0
12d944aad193d2ca5829d775f48ee1fe_rep;size=19;	x__sub0.01	x__sub0.01	x__sub0.01	x__sub0.01	x__sub0.01	x__sub0.01	x__sub0.01	0	0	0	0	0	0	1	0	0	0	0	0	0	0	0	0	0	0	0	0	0	0	0	0	0	0	0	0	0	0	0	0	0	0	0	0	0	0	0	0	0	0
1a5712fdd3e1d7a2cd06294fff469de2_rep;size=19;	x__sub0.01	x__sub0.01	x__sub0.01	x__sub0.01	x__sub0.01	x__sub0.01	x__sub0.01	0	0	0	0	0	0	0	0	0	0	0	0	0	0	0	0	0	0	0	0	0	0	0	0	0	0	0	0	0	0	0	0	0	0	0	0	0	0	0	0	0	0
13d2fff27fd3f887b30b151636c040d5_rep;size=19;	x__sub0.01	x__sub0.01	x__sub0.01	x__sub0.01	x__sub0.01	x__sub0.01	x__sub0.01	0	0	0	0	0	0	0	0	0	0	0	0	0	0	0	0	0	0	0	0	0	0	0	0	0	0	0	0	0	0	0	0	0	0	0	0	0	0	0	0	0	0
3a8a291fcdacab37291fa8c303fb14c9_rep;size=18;	x__sub0.01	x__sub0.01	x__sub0.01	x__sub0.01	x__sub0.01	x__sub0.01	x__sub0.01	0	0	0	0	0	0	0	0	0	0	0	0	0	0	0	0	0	0	0	0	1	0	0	0	0	0	0	0	0	0	0	0	0	0	0	0	0	0	0	0	0	0
71317c8619dedf114efe517d616ccd29_rep;size=18;	x__sub0.01	x__sub0.01	x__sub0.01	x__sub0.01	x__sub0.01	x__sub0.01	x__sub0.01	0	0	0	0	0	0	0	0	0	0	0	0	0	0	0	0	0	0	0	0	0	0	0	0	0	0	0	0	0	0	0	0	0	0	0	0	18	0	0	0	0	0
b83b2b9814a26d6630fd65afece2dfc3_rep;size=18;	x__sub0.01	x__sub0.01	x__sub0.01	x__sub0.01	x__sub0.01	x__sub0.01	x__sub0.01	1	0	0	0	1	0	0	0	0	0	0	0	0	0	0	0	0	0	0	0	0	0	0	0	0	0	0	0	0	0	0	0	0	0	0	0	0	0	0	0	0	0
98724aeb7c0a76249f9f55ae86e829d0_rep;size=18;	x__sub0.01	x__sub0.01	x__sub0.01	x__sub0.01	x__sub0.01	x__sub0.01	x__sub0.01	0	0	0	0	0	0	0	0	0	0	0	0	0	0	0	0	0	0	0	0	0	0	0	0	0	0	0	0	0	0	0	0	0	0	0	0	0	0	0	0	0	0
0c34c6018e46467cea2575118b62cb17_rep;size=18;	x__sub0.01	x__sub0.01	x__sub0.01	x__sub0.01	x__sub0.01	x__sub0.01	x__sub0.01	0	0	0	0	0	0	0	0	0	0	0	0	0	0	0	0	0	0	0	0	0	0	0	0	0	0	0	0	0	0	0	0	0	0	0	0	0	0	0	0	0	0
221647004b1afc3de6526dedb99273bf_rep;size=18;	x__sub0.01	x__sub0.01	x__sub0.01	x__sub0.01	x__sub0.01	x__sub0.01	x__sub0.01	0	0	0	0	0	0	0	0	0	0	0	0	0	0	0	0	0	0	0	0	0	0	0	0	0	0	0	0	0	0	0	0	0	0	0	0	0	0	0	0	0	0
318a7557c3d221bcb66056324fc0a809_rep;size=18;	x__sub0.01	x__sub0.01	x__sub0.01	x__sub0.01	x__sub0.01	x__sub0.01	x__sub0.01	0	0	0	0	0	0	0	0	0	0	0	0	0	0	0	0	0	0	0	0	0	0	0	0	0	0	0	0	0	0	0	0	0	0	0	0	0	0	0	0	0	0
c2286700a113d61b1a58767917c62cbc_rep;size=18;	x__sub0.01	x__sub0.01	x__sub0.01	x__sub0.01	x__sub0.01	x__sub0.01	x__sub0.01	0	0	0	0	0	0	0	0	0	0	0	0	0	0	0	0	0	0	0	0	0	0	0	0	0	0	0	0	0	0	0	0	0	0	0	0	0	0	0	0	0	0
d9926d5b0219be3a8afdd254513c2b44_rep;size=18;	x__sub0.01	x__sub0.01	x__sub0.01	x__sub0.01	x__sub0.01	x__sub0.01	x__sub0.01	0	0	0	0	0	0	0	0	0	0	0	0	0	0	0	0	0	0	0	0	0	0	0	0	0	0	0	0	0	0	0	0	0	0	0	0	0	0	0	0	0	0
3e47fa06e755cbb2bd34be7f0764eb36_rep;size=18;	x__sub0.01	x__sub0.01	x__sub0.01	x__sub0.01	x__sub0.01	x__sub0.01	x__sub0.01	0	0	0	0	0	0	0	0	0	0	0	0	0	0	0	0	0	0	0	0	0	0	0	0	0	0	0	0	0	0	0	0	0	0	0	0	0	0	0	0	0	0
8dbc8f93c75b9526870325abfa37099c_rep;size=18;	x__sub0.01	x__sub0.01	x__sub0.01	x__sub0.01	x__sub0.01	x__sub0.01	x__sub0.01	0	0	0	0	0	0	0	0	0	0	0	0	0	0	0	0	0	0	0	0	1	0	0	0	0	0	0	0	0	0	0	0	2	0	0	0	1	0	0	0	0	0
97f558a228c7e96ea791dd5df7f4f09c_rep;size=18;	x__sub0.01	x__sub0.01	x__sub0.01	x__sub0.01	x__sub0.01	x__sub0.01	x__sub0.01	0	0	0	0	0	0	0	0	0	0	0	0	0	0	0	0	0	0	0	0	0	0	0	0	0	0	0	0	0	0	0	0	0	0	0	0	0	0	0	0	0	0
bed83357b85b7aa0deac1c122bb31065_rep;size=18;	x__sub0.01	x__sub0.01	x__sub0.01	x__sub0.01	x__sub0.01	x__sub0.01	x__sub0.01	0	0	0	0	0	0	0	0	0	0	0	0	0	0	0	0	0	0	0	0	3	0	0	0	0	0	0	0	0	0	0	0	0	0	0	0	0	0	0	0	0	0
0dad4a3e841972d476aab3a2943faeb7_rep;size=18;	x__sub0.01	x__sub0.01	x__sub0.01	x__sub0.01	x__sub0.01	x__sub0.01	x__sub0.01	0	0	0	0	0	0	0	0	0	0	0	0	0	0	0	0	3	0	0	0	0	0	0	0	0	0	0	0	0	0	0	0	0	0	0	0	0	0	0	0	0	0
1439a739811df70dbc83a1fa22fd6575_rep;size=18;	x__sub0.01	x__sub0.01	x__sub0.01	x__sub0.01	x__sub0.01	x__sub0.01	x__sub0.01	0	0	0	0	0	0	0	0	0	0	0	0	0	0	0	0	1	0	0	0	1	0	0	0	1	0	0	0	0	0	0	0	0	0	0	0	0	0	0	0	1	0
1d4a4020b6f3adb5bb62c4af9568c131_rep;size=18;	x__sub0.01	x__sub0.01	x__sub0.01	x__sub0.01	x__sub0.01	x__sub0.01	x__sub0.01	0	0	0	0	3	0	0	0	0	0	0	0	0	0	0	0	0	0	0	0	1	0	0	0	1	0	0	0	1	0	0	0	2	0	0	0	0	0	0	0	0	0
28ffa9f57ba1c7085236453302ef872f_rep;size=18;	x__sub0.01	x__sub0.01	x__sub0.01	x__sub0.01	x__sub0.01	x__sub0.01	x__sub0.01	0	0	0	0	0	0	0	0	0	0	0	0	0	0	0	0	0	0	0	0	0	0	0	0	0	0	0	0	0	0	0	0	0	0	0	0	0	0	0	0	0	0
29b1ca57cee819dbffa5f20202329fe3_rep;size=18;	x__sub0.01	x__sub0.01	x__sub0.01	x__sub0.01	x__sub0.01	x__sub0.01	x__sub0.01	0	0	0	0	1	0	0	0	0	0	0	0	0	0	0	0	0	0	0	0	0	0	0	0	0	0	0	0	0	0	0	0	0	0	0	0	0	0	0	0	0	0
5db7f2c2307f372ecef88fc44a797595_rep;size=18;	x__sub0.01	x__sub0.01	x__sub0.01	x__sub0.01	x__sub0.01	x__sub0.01	x__sub0.01	0	0	0	0	1	0	0	0	0	0	0	0	0	0	0	0	4	0	0	0	4	0	0	0	0	0	0	0	1	0	0	0	0	0	0	0	0	0	0	0	1	0
6663ae5913539bcc13be015014d8123a_rep;size=18;	x__sub0.01	x__sub0.01	x__sub0.01	x__sub0.01	x__sub0.01	x__sub0.01	x__sub0.01	0	0	0	0	0	0	0	0	0	0	0	0	0	0	0	0	0	0	0	0	0	0	0	0	0	0	0	0	0	0	0	0	0	0	0	0	0	0	0	0	0	0
6a4ad0abe1b4411f89ec57d6989b8db2_rep;size=18;	x__sub0.01	x__sub0.01	x__sub0.01	x__sub0.01	x__sub0.01	x__sub0.01	x__sub0.01	0	0	0	0	0	0	0	0	0	0	0	0	0	0	0	0	0	0	0	0	0	0	0	0	0	0	0	0	0	0	0	0	0	0	0	0	0	0	0	0	0	0
b924ff07b2419775636fa149974cf77c_rep;size=18;	x__sub0.01	x__sub0.01	x__sub0.01	x__sub0.01	x__sub0.01	x__sub0.01	x__sub0.01	0	0	0	0	0	0	0	0	0	0	0	0	0	0	0	0	0	0	0	0	0	0	0	0	0	0	0	0	0	0	0	0	0	0	0	0	0	0	0	0	0	0
fd700eb24787aae9f189325ad363575e_rep;size=18;	x__sub0.01	x__sub0.01	x__sub0.01	x__sub0.01	x__sub0.01	x__sub0.01	x__sub0.01	0	0	0	0	0	0	0	0	4	0	0	0	1	0	0	0	0	0	0	0	0	0	0	0	1	0	0	0	0	0	0	0	0	0	0	0	0	0	0	0	0	0
52f107c21b801051e8deacd7d850ecd9_rep;size=18;	x__sub0.01	x__sub0.01	x__sub0.01	x__sub0.01	x__sub0.01	x__sub0.01	x__sub0.01	0	0	0	0	0	0	0	0	0	0	0	0	1	0	0	0	0	0	0	0	3	0	0	0	0	0	0	0	0	0	0	0	0	0	0	0	0	0	0	0	0	0
fdbe2b6b225558e450334345a8a9efec_rep;size=18;	x__sub0.01	x__sub0.01	x__sub0.01	x__sub0.01	x__sub0.01	x__sub0.01	x__sub0.01	0	0	0	0	0	0	0	0	0	0	0	0	0	0	0	0	0	0	0	1	0	0	0	0	0	0	0	2	0	0	0	3	0	0	0	1	0	0	0	5	0	0
39541c9d5f4df582b424f86f51678e40_rep;size=18;	x__sub0.01	x__sub0.01	x__sub0.01	x__sub0.01	x__sub0.01	x__sub0.01	x__sub0.01	0	0	0	0	0	0	0	0	0	0	0	0	0	3	1	0	0	0	0	0	0	0	0	0	0	0	1	4	0	0	0	0	0	0	1	0	0	1	0	3	0	0
9417bcbf0d44b0731062ffb3d20c4c71_rep;size=18;	x__sub0.01	x__sub0.01	x__sub0.01	x__sub0.01	x__sub0.01	x__sub0.01	x__sub0.01	0	0	0	0	0	0	0	0	0	0	0	0	2	0	0	0	0	0	0	0	0	0	0	0	0	0	0	0	0	0	0	0	0	0	0	0	0	0	0	0	0	0
962645f0352e6517ca8a68e46a56af64_rep;size=18;	x__sub0.01	x__sub0.01	x__sub0.01	x__sub0.01	x__sub0.01	x__sub0.01	x__sub0.01	0	0	0	0	0	0	0	0	0	0	0	0	0	0	0	0	0	0	0	0	0	0	0	0	0	0	0	0	0	0	0	0	0	0	0	0	0	0	0	0	2	0
9f51cd0241c69b1c2692f73fc23ca3df_rep;size=18;	x__sub0.01	x__sub0.01	x__sub0.01	x__sub0.01	x__sub0.01	x__sub0.01	x__sub0.01	0	0	0	0	0	0	0	0	0	0	0	0	0	0	0	0	0	0	0	1	0	0	0	0	0	0	0	1	0	0	0	0	0	0	0	0	0	0	0	0	0	0
cdd0b2c2d1f8dead3dd4d001f6111f72_rep;size=18;	x__sub0.01	x__sub0.01	x__sub0.01	x__sub0.01	x__sub0.01	x__sub0.01	x__sub0.01	0	0	0	0	0	0	0	0	0	0	0	0	0	0	0	0	0	0	0	0	0	0	0	0	0	0	0	0	0	0	0	0	0	0	0	0	0	0	0	0	0	0
e6e13f772801783756cef6ccd4e115a5_rep;size=18;	x__sub0.01	x__sub0.01	x__sub0.01	x__sub0.01	x__sub0.01	x__sub0.01	x__sub0.01	0	0	0	0	1	0	0	0	0	0	0	0	0	0	0	0	0	0	0	0	0	0	0	0	0	0	0	0	0	0	0	0	0	0	0	0	0	0	0	0	0	0
1038c0068182f7c94b6e08216e1fcd54_rep;size=18;	x__sub0.01	x__sub0.01	x__sub0.01	x__sub0.01	x__sub0.01	x__sub0.01	x__sub0.01	0	0	0	0	0	0	0	0	0	0	0	0	0	0	0	0	0	0	0	0	0	0	0	0	0	0	0	0	0	0	0	0	0	0	0	0	0	0	0	0	0	0
65bbee2dc170a71ab8d4d999cf55b1df_rep;size=18;	x__sub0.01	x__sub0.01	x__sub0.01	x__sub0.01	x__sub0.01	x__sub0.01	x__sub0.01	0	0	0	0	0	0	0	0	0	0	0	0	0	0	0	0	0	0	0	0	0	0	0	0	0	0	0	0	0	0	0	0	0	0	0	0	0	0	0	0	0	0
7aa24c30784958d86771821e1af2c823_rep;size=18;	x__sub0.01	x__sub0.01	x__sub0.01	x__sub0.01	x__sub0.01	x__sub0.01	x__sub0.01	0	0	0	0	0	0	0	0	0	0	0	0	0	0	0	0	0	0	0	0	0	0	0	0	0	0	0	0	0	0	0	0	0	0	0	0	0	0	0	0	0	0
f049e7bf159b11aa2b36cd6f7136f5dd_rep;size=18;	x__sub0.01	x__sub0.01	x__sub0.01	x__sub0.01	x__sub0.01	x__sub0.01	x__sub0.01	0	2	0	0	0	0	0	1	0	0	0	0	0	0	0	0	0	0	0	0	0	0	0	0	0	0	0	0	0	0	0	0	0	0	0	0	0	0	0	0	0	0
5446a43d9e9e698dee036783e450281e_rep;size=18;	x__sub0.01	x__sub0.01	x__sub0.01	x__sub0.01	x__sub0.01	x__sub0.01	x__sub0.01	0	0	0	0	0	0	0	0	0	0	0	0	0	0	0	0	0	0	0	0	0	0	0	0	0	0	0	0	0	0	0	0	0	0	0	0	0	0	0	0	0	0
751859ceeb42d82164025b534219e602_rep;size=18;	x__sub0.01	x__sub0.01	x__sub0.01	x__sub0.01	x__sub0.01	x__sub0.01	x__sub0.01	0	0	0	0	0	0	0	0	0	0	0	0	0	0	0	0	0	0	0	0	0	0	0	0	0	0	0	0	0	0	0	0	0	0	0	0	0	0	0	0	0	0
ed1db09be569f9ebcc6a35be4742c3d1_rep;size=18;	x__sub0.01	x__sub0.01	x__sub0.01	x__sub0.01	x__sub0.01	x__sub0.01	x__sub0.01	0	0	0	0	0	0	0	0	0	0	0	0	0	0	0	0	10	0	0	0	0	0	0	0	0	0	0	0	0	0	0	0	0	0	0	0	0	0	0	0	0	0
5d559263e98d699152cc098845ffd84b_rep;size=18;	x__sub0.01	x__sub0.01	x__sub0.01	x__sub0.01	x__sub0.01	x__sub0.01	x__sub0.01	0	0	0	0	0	0	0	0	0	0	0	0	0	0	0	0	0	0	0	0	0	0	0	0	0	0	0	0	0	0	0	0	0	0	0	0	0	0	0	0	0	0
d59979039e47ef01ced662df8d5f9caa_rep;size=18;	x__sub0.01	x__sub0.01	x__sub0.01	x__sub0.01	x__sub0.01	x__sub0.01	x__sub0.01	0	0	0	0	0	0	0	0	0	0	0	0	3	0	0	0	0	0	0	0	0	0	0	0	2	0	0	0	1	0	0	0	0	0	0	0	0	0	0	0	0	0
0bd82bd20a0ecceab9ad2e37665bb7df_rep;size=18;	x__sub0.01	x__sub0.01	x__sub0.01	x__sub0.01	x__sub0.01	x__sub0.01	x__sub0.01	0	0	0	0	0	0	0	0	0	0	0	0	0	0	0	0	0	0	0	0	0	0	0	0	0	0	0	0	0	0	0	0	0	0	0	0	0	0	0	0	0	0
4a720404a5195e4704538b6eba516235_rep;size=18;	x__sub0.01	x__sub0.01	x__sub0.01	x__sub0.01	x__sub0.01	x__sub0.01	x__sub0.01	0	0	0	0	0	0	0	0	0	0	0	0	0	0	0	0	0	0	0	0	0	0	0	0	0	0	0	0	0	0	0	0	0	0	0	0	0	0	0	0	0	0
cd20c2093fba74e95a023683e277bc64_rep;size=18;	x__sub0.01	x__sub0.01	x__sub0.01	x__sub0.01	x__sub0.01	x__sub0.01	x__sub0.01	0	0	0	0	0	0	0	0	0	0	0	0	0	0	1	0	1	0	0	0	0	0	0	0	0	2	0	1	0	1	0	1	0	0	0	0	0	0	0	0	0	0
19d382284345233ea31d31e1bd8a7131_rep;size=18;	x__sub0.01	x__sub0.01	x__sub0.01	x__sub0.01	x__sub0.01	x__sub0.01	x__sub0.01	0	0	0	0	0	0	0	0	0	0	0	0	0	0	0	0	0	0	1	2	0	0	0	0	0	0	1	4	0	0	0	0	0	1	0	2	0	0	0	0	0	0
b3ede2d409db4eb25f98b716d39fe285_rep;size=18;	x__sub0.01	x__sub0.01	x__sub0.01	x__sub0.01	x__sub0.01	x__sub0.01	x__sub0.01	0	0	0	0	0	0	0	0	0	0	0	0	0	0	0	0	0	0	0	0	0	0	0	0	0	0	0	0	0	0	0	0	0	0	0	0	0	0	0	0	0	0
0c7c4bf27c8287110139693f517c028c_rep;size=18;	x__sub0.01	x__sub0.01	x__sub0.01	x__sub0.01	x__sub0.01	x__sub0.01	x__sub0.01	0	0	0	0	0	0	0	0	0	0	0	0	0	0	0	0	0	0	0	0	0	0	0	0	0	0	0	0	0	0	0	0	0	0	0	0	0	0	0	0	0	0
11a2da11575aafd5ab7a2d8e9d0a9a0a_rep;size=18;	x__sub0.01	x__sub0.01	x__sub0.01	x__sub0.01	x__sub0.01	x__sub0.01	x__sub0.01	0	0	0	0	0	0	0	0	0	0	0	0	0	0	0	0	0	0	0	0	0	0	0	0	0	0	0	0	0	0	0	0	0	0	0	0	0	0	0	0	0	0
26434c2c4b4d1150c40fdb87401b427d_rep;size=18;	x__sub0.01	x__sub0.01	x__sub0.01	x__sub0.01	x__sub0.01	x__sub0.01	x__sub0.01	0	0	0	0	0	0	0	0	0	0	0	0	0	0	0	0	0	0	0	0	2	0	0	0	1	0	0	0	1	0	0	0	1	0	0	0	0	0	0	0	0	0
2e46520f8eb6d73fa33be76eb902d480_rep;size=18;	x__sub0.01	x__sub0.01	x__sub0.01	x__sub0.01	x__sub0.01	x__sub0.01	x__sub0.01	0	0	0	0	0	0	0	0	0	0	0	0	0	0	0	0	0	0	0	0	0	0	0	0	0	0	0	0	0	0	0	0	0	0	0	0	0	0	0	0	0	0
21b0383b1c32437ba4495bb7f4bcd952_rep;size=17;	x__sub0.01	x__sub0.01	x__sub0.01	x__sub0.01	x__sub0.01	x__sub0.01	x__sub0.01	0	0	0	0	0	0	0	0	0	0	0	0	0	0	0	0	0	0	0	0	0	0	0	0	0	0	0	0	0	0	0	0	0	0	0	0	0	0	0	0	0	0
7875810ca22b7061283f099e5ef9e57f_rep;size=17;	x__sub0.01	x__sub0.01	x__sub0.01	x__sub0.01	x__sub0.01	x__sub0.01	x__sub0.01	0	0	0	0	0	0	0	0	0	0	0	0	0	0	0	0	0	0	0	0	0	0	0	0	0	0	0	0	0	0	0	0	0	0	0	0	0	0	0	0	0	0
6054dc09e6d38408ee0a7889d4b70eaa_rep;size=17;	x__sub0.01	x__sub0.01	x__sub0.01	x__sub0.01	x__sub0.01	x__sub0.01	x__sub0.01	0	0	0	0	0	0	0	0	0	0	0	0	0	0	0	0	0	0	0	0	0	0	0	0	0	0	0	0	1	0	0	0	0	0	0	0	4	0	0	0	0	0
fc017d23e8a314e0e153ba7ab5adfd31_rep;size=17;	x__sub0.01	x__sub0.01	x__sub0.01	x__sub0.01	x__sub0.01	x__sub0.01	x__sub0.01	0	0	0	0	0	0	0	0	2	0	0	0	0	0	0	0	0	0	0	0	0	0	0	0	0	0	0	0	0	0	0	0	1	0	0	0	0	0	0	0	0	0
10602e9d522710071f7355e9b4210003_rep;size=17;	x__sub0.01	x__sub0.01	x__sub0.01	x__sub0.01	x__sub0.01	x__sub0.01	x__sub0.01	0	0	0	0	0	0	0	0	0	0	0	0	0	0	0	0	0	0	0	0	0	0	0	0	0	0	0	0	0	0	0	0	0	0	0	0	0	0	0	0	0	0
d15ba8a6a518822e602c26383fb91dcf_rep;size=17;	x__sub0.01	x__sub0.01	x__sub0.01	x__sub0.01	x__sub0.01	x__sub0.01	x__sub0.01	0	0	0	0	0	0	0	0	0	0	0	0	0	0	0	0	0	0	0	0	0	0	0	0	0	0	0	0	0	0	0	0	2	0	0	0	0	0	0	0	0	0
015deb6a8b47fa07f65f1708c4ea88f5_rep;size=17;	x__sub0.01	x__sub0.01	x__sub0.01	x__sub0.01	x__sub0.01	x__sub0.01	x__sub0.01	0	0	0	0	0	0	0	0	0	0	0	0	0	0	0	0	0	0	0	0	0	0	0	0	0	0	0	0	0	0	0	0	0	0	0	0	0	0	0	0	0	0
06680054cf55f5a5ecb43ffb5bab4b04_rep;size=17;	x__sub0.01	x__sub0.01	x__sub0.01	x__sub0.01	x__sub0.01	x__sub0.01	x__sub0.01	0	0	0	0	0	0	0	0	0	0	0	0	0	0	0	0	0	0	0	0	1	0	0	0	0	0	0	0	0	0	0	0	0	0	0	0	0	0	0	0	0	0
58adbfb2c7fc75c856ace7cfe3a783d5_rep;size=17;	x__sub0.01	x__sub0.01	x__sub0.01	x__sub0.01	x__sub0.01	x__sub0.01	x__sub0.01	0	0	0	0	0	0	0	0	0	0	0	0	0	0	0	0	0	0	0	0	1	0	0	0	0	0	0	0	0	0	0	0	0	0	0	0	0	0	0	0	2	0
6c7c38afa0b5ed19afdc59a20e39220c_rep;size=17;	x__sub0.01	x__sub0.01	x__sub0.01	x__sub0.01	x__sub0.01	x__sub0.01	x__sub0.01	0	0	0	0	0	0	0	0	0	0	0	0	6	0	0	0	0	0	0	0	0	0	0	0	0	0	0	0	0	0	0	0	0	0	0	0	0	0	0	0	0	0
ac47ceec994cc68fe14344cce63579a5_rep;size=17;	x__sub0.01	x__sub0.01	x__sub0.01	x__sub0.01	x__sub0.01	x__sub0.01	x__sub0.01	0	0	0	0	0	0	0	0	0	0	0	0	0	0	0	0	0	0	0	0	0	0	0	0	0	0	0	0	0	0	0	0	0	0	0	0	0	0	0	0	0	0
b6df22bb4edd4e046c1672cc6292a40c_rep;size=17;	x__sub0.01	x__sub0.01	x__sub0.01	x__sub0.01	x__sub0.01	x__sub0.01	x__sub0.01	0	0	0	0	0	0	0	0	0	0	0	0	0	0	0	0	3	0	0	0	1	0	0	0	0	0	0	0	0	0	0	0	1	0	0	0	0	0	0	0	0	0
cecba3ed4e7992af9a8cf0df1c75e303_rep;size=17;	x__sub0.01	x__sub0.01	x__sub0.01	x__sub0.01	x__sub0.01	x__sub0.01	x__sub0.01	0	0	0	0	0	0	0	0	0	0	0	0	0	0	0	0	0	0	0	0	0	0	0	0	0	0	0	0	0	0	0	0	0	0	0	0	0	0	0	0	0	0
d65fe8e324db74d46167bca38ad65b05_rep;size=17;	x__sub0.01	x__sub0.01	x__sub0.01	x__sub0.01	x__sub0.01	x__sub0.01	x__sub0.01	0	0	0	1	0	0	0	0	0	0	0	0	0	0	0	0	0	0	0	0	0	0	0	0	0	0	0	0	0	0	0	0	0	0	0	1	0	0	1	0	0	0
0251071aa3dcc5101d5304d6ea00cf2c_rep;size=17;	x__sub0.01	x__sub0.01	x__sub0.01	x__sub0.01	x__sub0.01	x__sub0.01	x__sub0.01	0	0	0	0	1	0	0	0	0	0	0	0	1	0	0	0	0	0	0	0	0	0	0	0	0	0	0	0	0	0	0	0	1	0	0	0	1	0	0	0	0	0
1c80dbde2c9c8e947e213d458d91554c_rep;size=17;	x__sub0.01	x__sub0.01	x__sub0.01	x__sub0.01	x__sub0.01	x__sub0.01	x__sub0.01	0	0	0	0	0	0	0	0	0	0	0	0	0	0	0	0	0	0	0	0	0	0	0	0	1	0	0	0	0	0	0	0	0	0	0	0	0	0	0	0	0	0
44600276fe39a5c8500dc90c06d44e96_rep;size=17;	x__sub0.01	x__sub0.01	x__sub0.01	x__sub0.01	x__sub0.01	x__sub0.01	x__sub0.01	0	0	0	0	0	0	0	0	0	0	0	0	0	0	0	0	0	0	0	0	0	0	0	0	17	0	0	0	0	0	0	0	0	0	0	0	0	0	0	0	0	0
ea8b12d96ba473abc7a6582c49aa3822_rep;size=17;	x__sub0.01	x__sub0.01	x__sub0.01	x__sub0.01	x__sub0.01	x__sub0.01	x__sub0.01	0	0	0	0	0	0	0	0	0	0	0	0	0	0	0	0	0	0	0	0	0	0	0	0	0	0	0	0	0	0	0	0	0	0	0	0	0	0	0	0	0	0
14807d7b10f92be764718bae107d7723_rep;size=17;	x__sub0.01	x__sub0.01	x__sub0.01	x__sub0.01	x__sub0.01	x__sub0.01	x__sub0.01	0	0	0	0	0	0	0	0	0	0	0	1	0	0	1	0	0	0	0	0	0	0	0	0	1	0	1	0	0	0	0	1	0	1	1	2	0	0	0	0	0	0
a07cd204a63e9dff5369dea057c4713b_rep;size=17;	x__sub0.01	x__sub0.01	x__sub0.01	x__sub0.01	x__sub0.01	x__sub0.01	x__sub0.01	0	0	0	0	0	0	0	0	0	0	0	0	0	0	0	0	0	0	0	0	0	0	0	0	0	0	0	0	0	0	0	0	0	0	0	0	0	0	0	0	0	0
d79b9fd7ce9b10fc9cd9ec37372c4ff8_rep;size=17;	x__sub0.01	x__sub0.01	x__sub0.01	x__sub0.01	x__sub0.01	x__sub0.01	x__sub0.01	0	0	0	0	0	0	0	0	0	0	0	0	0	0	0	0	0	0	0	0	0	0	0	0	0	0	0	0	0	0	0	0	0	0	0	0	0	0	0	0	0	0
11cec7fe0cfa1fabb5b126f46ace5b50_rep;size=17;	x__sub0.01	x__sub0.01	x__sub0.01	x__sub0.01	x__sub0.01	x__sub0.01	x__sub0.01	0	0	0	0	0	0	0	0	0	0	0	0	0	0	0	0	0	0	0	0	0	0	0	0	0	0	0	0	0	0	0	0	0	0	0	0	0	0	0	0	0	0
4972e08eb69b27caeffaddfd1d347f74_rep;size=17;	x__sub0.01	x__sub0.01	x__sub0.01	x__sub0.01	x__sub0.01	x__sub0.01	x__sub0.01	0	0	0	0	0	0	0	0	0	0	0	0	0	0	0	0	0	0	0	0	0	0	0	0	0	0	0	0	0	0	0	0	0	0	0	0	0	0	0	0	0	0
892407138b24362dc7aaf99dfb9b98df_rep;size=17;	x__sub0.01	x__sub0.01	x__sub0.01	x__sub0.01	x__sub0.01	x__sub0.01	x__sub0.01	0	0	0	0	0	0	0	0	0	0	0	0	0	0	0	0	0	0	0	0	0	0	0	0	0	0	0	0	0	0	0	0	0	0	0	0	0	0	0	0	0	0
907a816105b5876d3a9f55475ed42344_rep;size=17;	x__sub0.01	x__sub0.01	x__sub0.01	x__sub0.01	x__sub0.01	x__sub0.01	x__sub0.01	0	0	0	0	0	0	0	0	0	0	0	0	0	0	0	0	0	0	0	0	0	0	0	0	0	0	0	0	0	0	0	1	0	0	0	0	0	0	0	0	0	0
99ad8f633f129690d05c25a8df05a712_rep;size=17;	x__sub0.01	x__sub0.01	x__sub0.01	x__sub0.01	x__sub0.01	x__sub0.01	x__sub0.01	0	0	0	0	0	0	0	0	0	0	0	0	0	0	0	0	0	0	0	0	0	0	0	0	0	0	0	0	0	0	0	0	0	0	0	0	0	0	0	0	0	0
9f598a15eca8806d8ca277b68bfa6fd7_rep;size=17;	x__sub0.01	x__sub0.01	x__sub0.01	x__sub0.01	x__sub0.01	x__sub0.01	x__sub0.01	0	0	0	0	0	0	0	0	0	0	0	0	2	0	0	0	1	0	0	0	0	0	0	0	1	0	0	0	0	0	0	0	0	0	0	0	0	0	0	0	0	0
b4bd04bf4a936bc2aecbe8ea29114360_rep;size=17;	x__sub0.01	x__sub0.01	x__sub0.01	x__sub0.01	x__sub0.01	x__sub0.01	x__sub0.01	0	0	0	0	0	0	0	0	0	0	0	0	0	0	0	0	0	0	0	0	0	0	0	0	0	0	0	0	0	0	0	0	0	0	0	0	0	0	0	0	0	0
b983ddabfcc4acd0f030c3d1e14d597a_rep;size=17;	x__sub0.01	x__sub0.01	x__sub0.01	x__sub0.01	x__sub0.01	x__sub0.01	x__sub0.01	0	0	0	0	0	0	0	0	0	0	0	0	0	0	0	0	0	0	0	0	0	0	0	0	0	0	0	0	0	0	0	0	0	0	0	0	0	0	0	0	0	0
23102df9b6f3fca3e942fe3f6182dfab_rep;size=17;	x__sub0.01	x__sub0.01	x__sub0.01	x__sub0.01	x__sub0.01	x__sub0.01	x__sub0.01	0	0	0	0	0	0	0	0	0	0	0	0	0	0	0	0	0	0	0	0	0	0	0	0	0	0	0	0	0	0	0	0	0	0	0	0	0	0	0	0	0	0
720acc8df2476a9d38680d624ad438d0_rep;size=17;	x__sub0.01	x__sub0.01	x__sub0.01	x__sub0.01	x__sub0.01	x__sub0.01	x__sub0.01	0	0	0	0	0	0	0	0	1	0	0	0	3	0	0	0	0	0	0	0	0	0	0	0	0	0	0	0	0	0	0	0	0	0	0	0	0	0	0	0	0	0
83b52c0dc7ad2719e21a109e77b0b82b_rep;size=17;	x__sub0.01	x__sub0.01	x__sub0.01	x__sub0.01	x__sub0.01	x__sub0.01	x__sub0.01	0	0	0	0	1	0	0	0	0	0	0	0	0	0	0	0	0	0	0	0	0	0	0	0	0	0	0	0	0	0	0	0	0	0	0	0	0	0	0	0	0	0
c451ae2a37e79eae2d26b7571a11d422_rep;size=17;	x__sub0.01	x__sub0.01	x__sub0.01	x__sub0.01	x__sub0.01	x__sub0.01	x__sub0.01	0	0	0	0	0	0	0	0	0	0	0	0	0	0	0	0	0	0	0	0	0	0	0	0	0	0	0	0	0	0	0	0	0	0	0	0	0	0	0	0	0	0
0bcab6ddc98c5c666a53992f9c4ed5c6_rep;size=17;	x__sub0.01	x__sub0.01	x__sub0.01	x__sub0.01	x__sub0.01	x__sub0.01	x__sub0.01	0	0	0	0	0	0	0	0	0	0	0	0	0	0	0	0	0	0	0	0	0	0	0	0	0	0	0	0	2	0	0	0	0	0	0	0	5	0	0	0	1	0
4725407c4c9c86e48aff70d44ee5dd43_rep;size=17;	x__sub0.01	x__sub0.01	x__sub0.01	x__sub0.01	x__sub0.01	x__sub0.01	x__sub0.01	0	0	0	0	0	0	0	0	0	0	0	0	0	0	0	0	0	0	0	0	0	0	0	0	0	0	0	0	0	0	0	0	0	0	0	0	0	0	0	0	0	0
74998ea9a8c2827afe34ab0e64b99212_rep;size=17;	x__sub0.01	x__sub0.01	x__sub0.01	x__sub0.01	x__sub0.01	x__sub0.01	x__sub0.01	0	0	0	0	0	0	0	0	0	1	0	0	0	0	0	0	0	0	0	0	0	3	0	0	0	0	0	0	0	0	0	0	0	0	0	0	0	0	0	0	0	0
7d445aa3cf7a3da9db781f806eb90903_rep;size=17;	x__sub0.01	x__sub0.01	x__sub0.01	x__sub0.01	x__sub0.01	x__sub0.01	x__sub0.01	0	0	0	0	0	0	0	0	0	0	0	0	0	0	0	0	0	0	0	1	0	0	0	0	0	0	0	1	0	0	0	1	0	0	0	0	0	0	0	0	0	0
9d8a3ffae1710a0e647be51c0aa10100_rep;size=17;	x__sub0.01	x__sub0.01	x__sub0.01	x__sub0.01	x__sub0.01	x__sub0.01	x__sub0.01	0	0	0	0	0	0	0	0	2	0	0	0	0	0	0	0	0	0	0	0	0	0	0	0	0	0	0	0	0	0	0	0	0	0	0	0	0	0	0	0	0	0
b2deb7d758af567d97503a2a8cf9f416_rep;size=17;	x__sub0.01	x__sub0.01	x__sub0.01	x__sub0.01	x__sub0.01	x__sub0.01	x__sub0.01	0	0	0	0	0	0	0	0	0	0	0	0	0	0	0	0	0	0	0	0	0	0	0	0	0	0	0	0	0	0	0	0	0	0	0	0	0	0	0	0	0	0
bba840e4ff87aed52382cdc8942c8e96_rep;size=17;	x__sub0.01	x__sub0.01	x__sub0.01	x__sub0.01	x__sub0.01	x__sub0.01	x__sub0.01	0	1	0	0	0	0	0	0	0	0	0	0	0	0	0	0	0	0	0	0	0	2	0	0	0	0	0	2	0	0	2	0	0	0	0	1	0	0	0	2	0	0
e3cebf7b34c211a0908231c15f4dc67f_rep;size=17;	x__sub0.01	x__sub0.01	x__sub0.01	x__sub0.01	x__sub0.01	x__sub0.01	x__sub0.01	0	0	0	0	0	0	0	0	0	0	0	0	0	0	0	0	0	0	0	0	0	0	0	0	0	0	0	0	0	0	0	0	0	0	0	0	0	0	0	0	0	0
ec5dec21d39fe8856a8dff2fd6186ff8_rep;size=17;	x__sub0.01	x__sub0.01	x__sub0.01	x__sub0.01	x__sub0.01	x__sub0.01	x__sub0.01	0	0	0	0	0	0	0	0	0	0	0	0	0	0	0	0	0	0	0	0	0	0	0	0	0	0	0	0	0	0	0	0	0	0	0	0	0	0	0	0	0	0
ef0e057fbc106678c04959c60fdb3c3c_rep;size=17;	x__sub0.01	x__sub0.01	x__sub0.01	x__sub0.01	x__sub0.01	x__sub0.01	x__sub0.01	0	0	0	0	0	0	0	0	0	0	0	0	0	0	0	0	0	0	0	0	0	0	0	0	0	0	0	0	0	0	0	0	0	0	0	0	0	0	0	0	0	0
1644049999f9da3ef80d6a1a5a098219_rep;size=17;	x__sub0.01	x__sub0.01	x__sub0.01	x__sub0.01	x__sub0.01	x__sub0.01	x__sub0.01	0	0	0	1	0	0	0	0	0	0	1	0	0	0	0	0	0	0	0	0	0	0	0	0	0	0	0	0	0	0	0	0	0	0	0	0	0	0	0	0	0	0
539340152d9d2fb281717ca1691efdfa_rep;size=17;	x__sub0.01	x__sub0.01	x__sub0.01	x__sub0.01	x__sub0.01	x__sub0.01	x__sub0.01	1	0	0	0	0	0	0	0	0	0	0	0	0	0	0	0	0	0	0	0	1	0	0	0	0	0	0	0	0	0	0	0	0	0	0	0	1	0	0	0	0	0
65616b8c6361e6c26d44996d464750ef_rep;size=17;	x__sub0.01	x__sub0.01	x__sub0.01	x__sub0.01	x__sub0.01	x__sub0.01	x__sub0.01	0	0	0	0	0	0	0	0	0	0	0	0	0	0	0	0	0	0	0	0	0	0	0	0	1	0	0	0	0	0	0	0	0	0	0	0	0	0	0	0	0	0
dba37b847c47659225953fac2a2cd5d5_rep;size=17;	x__sub0.01	x__sub0.01	x__sub0.01	x__sub0.01	x__sub0.01	x__sub0.01	x__sub0.01	0	0	0	0	0	0	0	0	0	0	0	0	0	0	0	0	0	0	0	0	0	0	0	0	0	0	0	0	0	0	0	0	0	0	0	0	0	0	0	0	0	0
417cff07dcf5cc2efedaec49cd83f401_rep;size=17;	x__sub0.01	x__sub0.01	x__sub0.01	x__sub0.01	x__sub0.01	x__sub0.01	x__sub0.01	0	0	0	0	0	0	0	0	0	0	0	0	0	0	0	0	0	0	0	0	0	0	0	0	0	0	0	0	0	0	0	0	0	0	0	0	0	0	0	0	0	0
420baa4fe6c64770cab16dbd990b4098_rep;size=17;	x__sub0.01	x__sub0.01	x__sub0.01	x__sub0.01	x__sub0.01	x__sub0.01	x__sub0.01	0	0	0	2	0	0	0	0	0	1	0	0	0	0	0	0	0	0	0	0	0	0	0	0	0	0	1	1	0	0	0	0	0	0	0	0	0	0	0	4	0	0
57b308364e2f045960320574f2c8f1dd_rep;size=17;	x__sub0.01	x__sub0.01	x__sub0.01	x__sub0.01	x__sub0.01	x__sub0.01	x__sub0.01	0	0	0	0	0	0	0	0	0	0	0	0	0	0	0	0	0	0	0	0	0	0	0	0	0	0	0	0	0	0	0	0	0	0	0	0	0	0	0	0	0	0
67c52bfe64cfe8b4d8471b2f0c7c3f68_rep;size=17;	x__sub0.01	x__sub0.01	x__sub0.01	x__sub0.01	x__sub0.01	x__sub0.01	x__sub0.01	0	0	0	0	0	0	0	0	2	0	0	0	1	0	0	0	0	0	0	0	0	0	0	0	0	0	0	0	0	0	0	0	0	0	0	0	0	0	0	0	1	0
72983baa731b5c356a0b1427b478aaae_rep;size=17;	x__sub0.01	x__sub0.01	x__sub0.01	x__sub0.01	x__sub0.01	x__sub0.01	x__sub0.01	0	0	0	0	0	0	0	0	0	0	0	0	0	0	0	0	0	0	0	0	0	0	0	0	0	0	0	0	0	0	0	0	0	0	0	0	0	0	0	0	0	0
cf9d7fc4434c61597a192922f1b9e3bc_rep;size=17;	x__sub0.01	x__sub0.01	x__sub0.01	x__sub0.01	x__sub0.01	x__sub0.01	x__sub0.01	0	0	0	0	0	0	0	0	0	0	0	0	0	0	0	0	0	0	0	0	0	0	0	0	0	0	0	0	0	0	0	0	0	0	0	0	0	0	0	0	0	0
fa69fb29e09dcc4c4f5ce50964c017d6_rep;size=17;	x__sub0.01	x__sub0.01	x__sub0.01	x__sub0.01	x__sub0.01	x__sub0.01	x__sub0.01	0	0	0	0	0	0	0	0	0	0	0	0	0	0	0	0	0	0	0	0	0	0	0	0	0	0	0	0	0	0	0	0	0	0	0	0	0	0	0	0	0	0
ffcabe8f7e634f548c9db129ba733635_rep;size=17;	x__sub0.01	x__sub0.01	x__sub0.01	x__sub0.01	x__sub0.01	x__sub0.01	x__sub0.01	0	0	0	0	0	0	0	0	0	0	0	0	0	0	0	0	0	0	0	0	0	0	0	0	0	0	0	0	0	0	0	0	0	0	0	0	0	0	0	0	0	0
4340aac3e5ccdacdfcd2858e479228de_rep;size=17;	x__sub0.01	x__sub0.01	x__sub0.01	x__sub0.01	x__sub0.01	x__sub0.01	x__sub0.01	0	0	0	0	0	0	0	0	0	0	0	0	0	0	0	0	0	0	0	0	0	0	0	0	0	0	0	0	0	0	0	0	0	0	0	0	0	0	0	0	0	0
7738963a388f139ed8154d7c35e07c29_rep;size=17;	x__sub0.01	x__sub0.01	x__sub0.01	x__sub0.01	x__sub0.01	x__sub0.01	x__sub0.01	0	0	3	0	0	0	0	0	0	1	1	0	0	1	0	0	0	0	0	0	0	0	2	0	0	0	0	1	0	0	0	0	0	1	0	0	0	1	0	0	1	0
a9d2f5322633710693760fedd73fc199_rep;size=17;	x__sub0.01	x__sub0.01	x__sub0.01	x__sub0.01	x__sub0.01	x__sub0.01	x__sub0.01	0	0	0	0	0	0	0	0	0	0	0	0	0	0	0	0	0	0	0	0	0	0	0	0	0	0	0	0	0	0	0	0	0	0	0	0	0	0	0	0	0	0
30b095d94b64292365ad50a159ab46f3_rep;size=17;	x__sub0.01	x__sub0.01	x__sub0.01	x__sub0.01	x__sub0.01	x__sub0.01	x__sub0.01	0	0	0	0	0	0	0	0	0	0	0	0	0	0	0	0	0	0	0	0	0	0	0	0	0	0	0	0	0	0	0	0	0	0	0	0	0	0	0	0	0	0
8eebe483654c5d98772723c50f6ec550_rep;size=17;	x__sub0.01	x__sub0.01	x__sub0.01	x__sub0.01	x__sub0.01	x__sub0.01	x__sub0.01	0	0	0	0	0	0	0	1	0	0	0	0	0	0	0	0	0	0	0	0	0	0	0	0	0	0	0	0	0	0	0	0	0	0	0	0	0	0	0	0	0	0
dccca1312ddd2f12eda54fc3f10a91a7_rep;size=17;	x__sub0.01	x__sub0.01	x__sub0.01	x__sub0.01	x__sub0.01	x__sub0.01	x__sub0.01	0	0	0	0	0	0	0	0	0	0	0	0	0	0	0	0	0	0	0	0	0	0	0	0	0	0	1	0	0	0	0	0	0	0	0	0	0	0	0	0	0	0
0835bddc83dbde38698415d88e357a5c_rep;size=17;	x__sub0.01	x__sub0.01	x__sub0.01	x__sub0.01	x__sub0.01	x__sub0.01	x__sub0.01	0	0	0	0	0	0	0	0	0	0	0	0	0	0	0	0	0	0	0	0	0	0	0	0	0	0	0	0	0	0	0	0	0	0	0	0	0	0	0	0	0	0
405f647ddd98f07a3271d410ba96a938_rep;size=16;	Unassigned	Unassigned	Unassigned	Unassigned	Unassigned	Unassigned	Unassigned	0	0	0	0	0	0	0	0	0	0	0	0	0	0	0	0	0	0	0	0	0	0	0	0	0	0	0	0	0	0	0	0	0	0	0	0	0	0	0	0	0	0
9ad7f5e633685224a6a449a400752a92_rep;size=16;	x__sub0.01	x__sub0.01	x__sub0.01	x__sub0.01	x__sub0.01	x__sub0.01	x__sub0.01	0	0	0	0	0	0	0	0	0	0	0	0	0	0	0	0	0	0	0	0	1	0	0	0	0	0	0	0	0	0	0	0	1	0	0	0	1	0	0	0	0	0
2a68cab1c27770df605744dd6b782fe0_rep;size=16;	x__sub0.01	x__sub0.01	x__sub0.01	x__sub0.01	x__sub0.01	x__sub0.01	x__sub0.01	0	0	0	0	0	0	0	0	0	0	0	0	0	0	0	0	0	0	0	0	0	0	0	0	0	0	0	0	0	0	0	0	0	0	0	0	0	0	0	0	0	0
b1421e081dec084048ee4edeb9e1014a_rep;size=16;	x__sub0.01	x__sub0.01	x__sub0.01	x__sub0.01	x__sub0.01	x__sub0.01	x__sub0.01	0	0	0	0	0	0	0	0	0	0	0	0	0	0	0	0	0	0	0	0	0	0	0	0	0	0	0	0	0	0	0	0	0	0	0	0	0	0	0	0	0	0
bbf6f6d7c6b4863d55714d826764f144_rep;size=16;	x__sub0.01	x__sub0.01	x__sub0.01	x__sub0.01	x__sub0.01	x__sub0.01	x__sub0.01	0	0	0	0	0	0	0	0	0	0	0	0	0	0	0	0	0	0	0	0	0	0	0	0	0	0	0	0	0	0	0	0	0	0	0	0	0	0	0	0	0	0
48a6d8cfa2faff01490b4078d3a8afb9_rep;size=16;	x__sub0.01	x__sub0.01	x__sub0.01	x__sub0.01	x__sub0.01	x__sub0.01	x__sub0.01	0	0	0	0	0	0	0	0	0	0	0	0	1	0	0	0	0	0	0	0	0	0	0	0	0	0	0	0	0	0	0	0	1	0	0	0	1	0	0	0	0	0
660ec63e4232aa3351ab1e1a9b9ae5d2_rep;size=16;	x__sub0.01	x__sub0.01	x__sub0.01	x__sub0.01	x__sub0.01	x__sub0.01	x__sub0.01	0	0	0	0	0	0	0	0	0	0	0	0	0	0	0	0	0	0	0	0	0	0	0	0	0	0	0	0	0	0	0	0	3	0	0	0	0	0	0	0	0	0
80ebbc1d1debc4e3923b036d687ee5fd_rep;size=16;	x__sub0.01	x__sub0.01	x__sub0.01	x__sub0.01	x__sub0.01	x__sub0.01	x__sub0.01	1	0	0	0	0	0	0	0	0	0	0	0	0	0	0	0	0	0	0	0	0	0	0	0	0	0	0	0	0	0	0	0	0	0	0	0	0	0	0	0	0	0
9fbadfc059d2dfe24c633d95e673f613_rep;size=16;	x__sub0.01	x__sub0.01	x__sub0.01	x__sub0.01	x__sub0.01	x__sub0.01	x__sub0.01	0	0	0	0	0	0	0	0	0	0	0	0	0	0	0	0	1	0	0	0	0	0	0	0	1	0	0	0	2	0	0	0	0	0	0	0	0	0	0	0	1	0
b9caaa85f6ec40594689ffc1c001034c_rep;size=16;	x__sub0.01	x__sub0.01	x__sub0.01	x__sub0.01	x__sub0.01	x__sub0.01	x__sub0.01	0	0	0	0	0	0	0	0	0	0	0	0	0	0	0	0	0	0	0	0	0	0	0	0	0	0	0	0	0	0	0	0	0	0	0	0	2	0	0	0	0	0
d7ffe0f846e9cb66f5cc7676cc09694b_rep;size=16;	x__sub0.01	x__sub0.01	x__sub0.01	x__sub0.01	x__sub0.01	x__sub0.01	x__sub0.01	0	0	0	0	0	0	0	0	0	0	0	0	0	0	0	0	0	0	0	0	0	0	0	0	0	0	0	0	0	0	0	0	0	0	0	0	0	0	0	0	0	0
78651d309594365d97e98438d968188c_rep;size=16;	x__sub0.01	x__sub0.01	x__sub0.01	x__sub0.01	x__sub0.01	x__sub0.01	x__sub0.01	0	0	0	0	0	0	0	0	0	0	0	0	0	0	0	0	0	0	0	0	0	0	0	0	0	0	0	0	8	0	0	0	0	0	0	0	0	0	0	0	0	0
9041538faa533a8721796903417f7ee9_rep;size=16;	x__sub0.01	x__sub0.01	x__sub0.01	x__sub0.01	x__sub0.01	x__sub0.01	x__sub0.01	0	0	0	0	0	0	0	0	0	0	0	0	0	0	0	0	0	0	0	0	0	0	0	0	0	0	0	0	0	0	0	0	0	0	0	0	0	0	0	0	0	0
10f63f0077561e9771e6f7ae56c98fe2_rep;size=16;	x__sub0.01	x__sub0.01	x__sub0.01	x__sub0.01	x__sub0.01	x__sub0.01	x__sub0.01	0	0	1	0	0	0	0	0	0	0	0	0	0	0	0	0	0	0	0	0	0	0	0	0	0	0	0	0	0	0	0	0	0	0	0	0	0	0	0	0	0	0
65244a30634e2b00c88f0d813ff82c9b_rep;size=16;	x__sub0.01	x__sub0.01	x__sub0.01	x__sub0.01	x__sub0.01	x__sub0.01	x__sub0.01	0	0	0	0	0	0	0	0	0	0	0	0	0	0	0	0	0	0	0	0	0	0	0	0	0	0	0	0	0	0	0	0	0	0	0	0	0	0	0	0	0	0
8cbabcfc742afae40de6c296cf8d57c7_rep;size=16;	x__sub0.01	x__sub0.01	x__sub0.01	x__sub0.01	x__sub0.01	x__sub0.01	x__sub0.01	0	0	0	0	0	0	0	0	1	0	0	0	3	0	0	0	0	0	0	0	0	0	0	0	0	0	0	0	0	0	0	0	0	0	0	0	0	0	0	0	0	0
8e861b7af7e370f731869087e4f4d47a_rep;size=16;	x__sub0.01	x__sub0.01	x__sub0.01	x__sub0.01	x__sub0.01	x__sub0.01	x__sub0.01	0	0	0	0	0	0	0	0	0	0	0	0	0	0	0	0	0	0	0	0	0	0	0	0	0	0	0	0	0	0	0	0	0	0	0	0	0	0	0	0	0	0
a6d7e50d51613eff03992be8c241cad4_rep;size=16;	x__sub0.01	x__sub0.01	x__sub0.01	x__sub0.01	x__sub0.01	x__sub0.01	x__sub0.01	0	0	0	0	0	0	0	0	0	0	0	1	0	0	0	0	0	0	0	0	0	0	1	0	0	3	2	0	0	0	0	0	0	0	0	0	0	0	1	6	0	0
1356a8aeb532b39b27e9a677b8e57be8_rep;size=16;	x__sub0.01	x__sub0.01	x__sub0.01	x__sub0.01	x__sub0.01	x__sub0.01	x__sub0.01	0	0	0	0	0	0	0	0	0	0	0	0	0	0	0	0	0	0	0	0	0	0	0	0	0	0	0	0	0	0	0	0	0	0	0	0	0	0	0	0	0	0
3515fdfc28f3766eac465b61dc090f85_rep;size=16;	x__sub0.01	x__sub0.01	x__sub0.01	x__sub0.01	x__sub0.01	x__sub0.01	x__sub0.01	3	0	0	0	0	0	0	0	0	0	0	0	0	0	0	0	0	0	0	0	2	0	0	0	3	0	0	0	2	0	0	0	0	0	0	0	0	0	0	0	1	0
736e86a67d1f6f8eb9b5954aba21f479_rep;size=16;	x__sub0.01	x__sub0.01	x__sub0.01	x__sub0.01	x__sub0.01	x__sub0.01	x__sub0.01	0	0	0	0	0	0	0	0	1	0	0	0	1	0	0	0	0	0	0	0	0	0	0	0	1	0	0	0	0	0	0	0	0	0	0	0	0	0	0	0	0	0
93dba43bce8d69e01fffb0838f3eba45_rep;size=16;	x__sub0.01	x__sub0.01	x__sub0.01	x__sub0.01	x__sub0.01	x__sub0.01	x__sub0.01	0	0	0	0	0	0	0	0	0	0	0	0	0	0	0	0	0	0	0	0	0	0	0	0	0	0	0	0	1	0	0	0	1	0	0	0	1	0	0	0	0	0
a7927b702359fd51c927c467aa2b5c93_rep;size=16;	x__sub0.01	x__sub0.01	x__sub0.01	x__sub0.01	x__sub0.01	x__sub0.01	x__sub0.01	0	0	0	0	0	0	0	0	1	0	0	0	0	0	0	0	1	0	0	0	0	0	0	0	0	0	0	0	0	0	0	0	0	0	0	0	1	0	0	0	0	0
0e3d0063cc2028e3079adcd26104281d_rep;size=16;	x__sub0.01	x__sub0.01	x__sub0.01	x__sub0.01	x__sub0.01	x__sub0.01	x__sub0.01	0	0	0	0	0	0	0	0	0	0	0	0	0	0	0	0	0	0	0	0	0	0	0	0	0	0	0	0	0	0	0	0	0	0	0	0	0	0	0	0	0	0
2e23fe9269cb48f5736fc0ed11b52219_rep;size=16;	x__sub0.01	x__sub0.01	x__sub0.01	x__sub0.01	x__sub0.01	x__sub0.01	x__sub0.01	0	0	0	0	0	0	0	0	0	0	0	0	0	0	0	0	0	0	0	0	0	0	0	0	0	0	0	0	0	0	0	0	0	0	0	0	0	0	0	0	0	0
31e21e4b97a4697752022463831ebb98_rep;size=16;	x__sub0.01	x__sub0.01	x__sub0.01	x__sub0.01	x__sub0.01	x__sub0.01	x__sub0.01	0	0	0	0	0	0	0	0	0	0	0	0	0	0	0	0	0	0	0	0	0	0	0	0	2	0	0	0	0	0	0	0	0	0	0	0	0	0	0	0	0	0
346c587adde1553068d5b9c16f43432f_rep;size=16;	x__sub0.01	x__sub0.01	x__sub0.01	x__sub0.01	x__sub0.01	x__sub0.01	x__sub0.01	0	0	0	0	0	0	0	0	0	0	0	0	0	0	0	0	1	0	0	0	0	0	0	0	0	0	0	0	0	0	0	0	0	0	0	0	0	0	0	0	0	0
43eb11834f949d134164a910efe56b5a_rep;size=16;	x__sub0.01	x__sub0.01	x__sub0.01	x__sub0.01	x__sub0.01	x__sub0.01	x__sub0.01	0	0	1	0	0	0	2	0	0	0	0	0	0	0	0	0	0	0	0	0	0	0	0	1	0	0	0	0	0	0	0	0	0	0	0	1	0	0	0	0	0	0
5f232e1ab26ee06710334c9c34954bf2_rep;size=16;	x__sub0.01	x__sub0.01	x__sub0.01	x__sub0.01	x__sub0.01	x__sub0.01	x__sub0.01	0	0	0	0	0	0	0	0	0	0	0	0	0	0	0	0	3	0	0	0	0	0	0	0	0	0	0	0	0	0	0	0	0	0	0	0	2	0	0	0	0	0
69599b1b732e8b5e2861317a9074b253_rep;size=16;	x__sub0.01	x__sub0.01	x__sub0.01	x__sub0.01	x__sub0.01	x__sub0.01	x__sub0.01	0	0	0	0	0	0	0	0	0	0	0	0	0	0	0	0	0	0	0	0	0	0	0	0	1	0	0	0	0	0	0	0	0	0	0	0	0	0	0	0	0	0
7ee01f60a88f6941e999edd1b874985c_rep;size=16;	x__sub0.01	x__sub0.01	x__sub0.01	x__sub0.01	x__sub0.01	x__sub0.01	x__sub0.01	0	0	0	0	0	0	0	0	0	0	0	0	0	0	0	0	0	0	0	0	0	0	0	0	0	0	0	0	0	0	0	0	0	0	0	0	0	0	0	0	0	0
937dd093ae5a5313e3a58205dc439edf_rep;size=16;	x__sub0.01	x__sub0.01	x__sub0.01	x__sub0.01	x__sub0.01	x__sub0.01	x__sub0.01	0	0	0	0	0	0	0	0	0	0	0	0	5	0	0	0	3	0	0	0	0	0	0	0	0	0	0	0	0	0	0	0	0	0	0	0	0	0	0	0	0	0
b0840f8272e2756c7c36d0fa15ce8072_rep;size=16;	x__sub0.01	x__sub0.01	x__sub0.01	x__sub0.01	x__sub0.01	x__sub0.01	x__sub0.01	0	0	0	0	0	0	0	0	0	0	0	0	0	0	0	0	0	0	0	0	0	0	0	0	0	0	0	0	0	0	0	0	0	0	0	0	0	0	0	0	0	0
293327ffabfb9a46b4e38a2e27ed5b8b_rep;size=16;	x__sub0.01	x__sub0.01	x__sub0.01	x__sub0.01	x__sub0.01	x__sub0.01	x__sub0.01	0	0	0	0	0	0	0	0	0	0	0	0	0	0	0	0	0	0	0	0	0	0	0	0	0	0	0	0	0	0	0	0	0	0	0	0	0	0	0	0	0	0
6a0ae26609960197bbb3f5abf67634ef_rep;size=16;	x__sub0.01	x__sub0.01	x__sub0.01	x__sub0.01	x__sub0.01	x__sub0.01	x__sub0.01	0	0	0	0	1	0	0	0	0	0	0	0	0	0	0	0	0	0	0	0	0	0	0	0	0	0	0	0	0	0	0	0	0	0	0	0	0	0	0	0	0	0
f732ea4f1412236d47d6cb663f4d5d82_rep;size=16;	x__sub0.01	x__sub0.01	x__sub0.01	x__sub0.01	x__sub0.01	x__sub0.01	x__sub0.01	0	0	0	0	0	0	0	0	0	0	0	0	0	0	0	0	0	0	0	0	0	0	0	0	0	0	0	0	0	0	0	0	0	0	0	0	0	0	0	0	0	0
23b9e7156d385a29ed5c7026b4eb12bd_rep;size=16;	x__sub0.01	x__sub0.01	x__sub0.01	x__sub0.01	x__sub0.01	x__sub0.01	x__sub0.01	0	0	0	1	0	0	0	0	0	0	0	0	0	0	0	0	0	0	0	0	0	0	0	0	0	0	0	0	0	0	0	0	0	0	0	0	0	0	0	1	0	0
61b30275bd1c3db5dd329ed81b615ccf_rep;size=16;	x__sub0.01	x__sub0.01	x__sub0.01	x__sub0.01	x__sub0.01	x__sub0.01	x__sub0.01	0	0	0	0	0	0	0	0	0	0	0	0	0	0	0	0	0	0	0	0	0	0	0	0	0	0	0	0	0	0	0	0	0	0	0	0	0	0	0	0	0	0
904de701d8ae537c97e2cf84fe33da5f_rep;size=16;	x__sub0.01	x__sub0.01	x__sub0.01	x__sub0.01	x__sub0.01	x__sub0.01	x__sub0.01	0	0	0	0	0	0	0	0	0	0	0	0	1	0	0	0	0	0	0	0	0	0	0	0	0	0	0	0	0	0	0	0	0	0	0	0	0	0	0	0	0	0
a427cd887fa1afbccc06f1dacf6c6187_rep;size=16;	x__sub0.01	x__sub0.01	x__sub0.01	x__sub0.01	x__sub0.01	x__sub0.01	x__sub0.01	0	0	0	0	0	0	0	0	0	0	0	0	0	0	0	0	0	0	0	0	0	0	0	0	0	0	0	0	0	0	0	0	0	0	0	0	0	0	0	0	2	0
fb0b6d59c5e28974fd5ea71c9e1a03f6_rep;size=16;	x__sub0.01	x__sub0.01	x__sub0.01	x__sub0.01	x__sub0.01	x__sub0.01	x__sub0.01	0	0	0	0	0	0	0	0	0	0	0	0	0	0	0	0	0	0	0	0	0	0	0	0	0	0	0	0	0	0	0	0	0	0	0	0	0	0	0	0	0	0
a9f1be9084eed4bd4ca15e007cc3c5ab_rep;size=16;	x__sub0.01	x__sub0.01	x__sub0.01	x__sub0.01	x__sub0.01	x__sub0.01	x__sub0.01	0	0	0	0	0	0	0	0	0	0	0	0	0	0	0	0	0	0	0	0	0	0	0	0	0	0	0	0	0	0	0	0	0	0	0	0	0	0	0	0	0	0
b3524c4105774fe9b64e7b95b11763d8_rep;size=16;	x__sub0.01	x__sub0.01	x__sub0.01	x__sub0.01	x__sub0.01	x__sub0.01	x__sub0.01	0	0	0	0	0	0	0	0	0	0	0	0	0	0	0	0	0	0	0	0	0	0	0	0	0	0	0	0	0	0	0	0	0	0	0	0	0	0	0	0	0	0
baed66a915a8052ad057695507312fd4_rep;size=16;	x__sub0.01	x__sub0.01	x__sub0.01	x__sub0.01	x__sub0.01	x__sub0.01	x__sub0.01	0	0	0	0	0	0	0	0	0	0	0	0	0	0	0	0	0	0	0	0	0	0	0	0	0	0	0	0	0	0	0	0	1	0	0	0	2	0	0	0	0	0
de08ad70c5962d3e007c3d0b9cb72e54_rep;size=16;	x__sub0.01	x__sub0.01	x__sub0.01	x__sub0.01	x__sub0.01	x__sub0.01	x__sub0.01	0	0	0	0	0	0	0	0	0	0	0	0	0	0	0	0	0	0	0	0	0	0	0	0	0	0	0	0	0	0	0	0	0	0	0	0	0	0	0	0	0	0
df50f5f6439ea48b33a82487f4672303_rep;size=16;	x__sub0.01	x__sub0.01	x__sub0.01	x__sub0.01	x__sub0.01	x__sub0.01	x__sub0.01	0	0	0	0	0	0	0	0	0	0	0	0	0	0	0	0	0	0	0	0	0	0	0	0	0	0	0	0	0	0	0	0	0	0	0	0	0	0	0	0	0	0
26208cfc6fff7f8f09f25fcf5a316376_rep;size=16;	x__sub0.01	x__sub0.01	x__sub0.01	x__sub0.01	x__sub0.01	x__sub0.01	x__sub0.01	2	0	0	0	0	0	0	0	0	0	0	0	0	0	0	0	3	0	0	0	1	0	0	0	0	0	0	0	0	0	0	0	1	0	0	0	0	0	0	0	1	0
457a34bbe047fb2e9a2e6c9b2bb12b6d_rep;size=16;	x__sub0.01	x__sub0.01	x__sub0.01	x__sub0.01	x__sub0.01	x__sub0.01	x__sub0.01	0	0	0	0	0	0	0	0	0	0	0	0	0	0	0	0	0	0	0	0	0	0	0	0	0	0	0	0	0	0	0	0	0	0	0	0	0	0	0	0	0	0
88cadde5752bebc781af86f772de354c_rep;size=16;	x__sub0.01	x__sub0.01	x__sub0.01	x__sub0.01	x__sub0.01	x__sub0.01	x__sub0.01	0	0	0	0	0	0	0	0	0	0	0	0	0	0	0	0	0	0	0	0	0	0	0	0	0	0	0	0	0	0	0	0	0	0	0	0	0	0	0	0	0	0
c208c74f2b043350a6b4981e295ebcd2_rep;size=16;	x__sub0.01	x__sub0.01	x__sub0.01	x__sub0.01	x__sub0.01	x__sub0.01	x__sub0.01	0	0	0	0	0	0	0	0	0	0	0	0	0	0	0	0	0	0	0	0	0	0	0	0	0	0	0	0	0	0	0	0	0	0	0	1	0	0	0	0	0	0
d9685369d1bd6bab22467257431bede5_rep;size=16;	x__sub0.01	x__sub0.01	x__sub0.01	x__sub0.01	x__sub0.01	x__sub0.01	x__sub0.01	0	0	0	0	0	0	0	0	0	0	0	0	0	0	0	0	0	0	0	0	0	0	0	0	0	0	0	0	0	0	0	0	0	0	0	0	0	0	0	0	0	0
ed283ee29b894983b133765250b230ee_rep;size=16;	x__sub0.01	x__sub0.01	x__sub0.01	x__sub0.01	x__sub0.01	x__sub0.01	x__sub0.01	0	0	0	0	0	1	0	0	0	0	1	0	0	0	0	1	0	0	0	0	0	0	0	0	0	0	0	0	0	0	0	0	0	0	0	1	0	1	0	4	0	0
eecc2befa222726009268b1a32e3e54c_rep;size=16;	x__sub0.01	x__sub0.01	x__sub0.01	x__sub0.01	x__sub0.01	x__sub0.01	x__sub0.01	0	0	0	0	0	0	0	0	0	0	0	0	1	0	0	0	0	0	0	0	0	0	0	0	0	0	0	0	0	0	0	0	0	0	0	0	0	0	0	0	1	0
f3278f16429f02e20ed0261302ce58bf_rep;size=16;	x__sub0.01	x__sub0.01	x__sub0.01	x__sub0.01	x__sub0.01	x__sub0.01	x__sub0.01	0	0	0	0	0	0	0	0	0	0	0	0	0	0	0	0	0	0	0	0	0	0	0	0	0	0	0	0	0	0	0	0	0	0	0	0	0	0	0	0	0	0
21efea875836c542a89f8ee5c51a6926_rep;size=16;	x__sub0.01	x__sub0.01	x__sub0.01	x__sub0.01	x__sub0.01	x__sub0.01	x__sub0.01	0	0	0	0	0	0	0	0	0	0	0	0	0	0	0	0	0	0	0	0	0	0	0	0	0	0	0	0	0	0	0	0	0	0	0	0	0	0	0	0	0	0
7ef018ca077af0389dd77eaafbc5d1f6_rep;size=16;	x__sub0.01	x__sub0.01	x__sub0.01	x__sub0.01	x__sub0.01	x__sub0.01	x__sub0.01	0	0	0	0	0	0	0	0	0	0	0	0	0	0	0	0	0	0	0	0	0	0	0	0	0	0	0	0	0	0	0	0	0	0	0	0	0	0	0	0	0	0
456a857ce98e61daa84a8ae4f9369339_rep;size=16;	x__sub0.01	x__sub0.01	x__sub0.01	x__sub0.01	x__sub0.01	x__sub0.01	x__sub0.01	0	0	0	0	0	0	0	0	0	0	0	0	0	0	0	0	0	0	0	0	0	0	0	0	0	0	0	0	0	0	0	0	0	0	0	0	0	0	0	0	0	0
561e6e276b134027eecd24fdb7e6302a_rep;size=16;	x__sub0.01	x__sub0.01	x__sub0.01	x__sub0.01	x__sub0.01	x__sub0.01	x__sub0.01	0	0	0	0	0	0	0	0	0	0	0	0	0	0	0	0	0	0	0	0	0	0	0	0	0	0	0	0	0	0	0	0	0	0	0	1	0	0	0	0	0	0
72c298178ad77288aa8828265cffee8d_rep;size=16;	x__sub0.01	x__sub0.01	x__sub0.01	x__sub0.01	x__sub0.01	x__sub0.01	x__sub0.01	0	0	0	0	0	0	0	0	0	0	0	0	0	0	0	0	0	0	0	0	0	0	0	0	0	0	0	0	0	0	0	0	0	0	0	0	0	0	0	0	0	0
89d181b0e4539006e85ebea7a7637b63_rep;size=16;	x__sub0.01	x__sub0.01	x__sub0.01	x__sub0.01	x__sub0.01	x__sub0.01	x__sub0.01	0	0	0	0	0	0	0	0	0	0	0	0	0	0	0	0	0	0	0	0	0	0	0	0	0	0	0	0	0	0	0	0	0	0	0	0	0	0	0	0	0	0
598b60399d4a7440b888ce6c0be08958_rep;size=16;	x__sub0.01	x__sub0.01	x__sub0.01	x__sub0.01	x__sub0.01	x__sub0.01	x__sub0.01	0	0	0	0	0	0	0	0	0	0	0	0	0	0	0	0	0	0	0	0	0	0	0	0	0	0	0	0	0	0	0	0	0	0	0	0	0	0	0	0	0	0
c2068609604aba207e54749882b170f0_rep;size=15;	x__sub0.01	x__sub0.01	x__sub0.01	x__sub0.01	x__sub0.01	x__sub0.01	x__sub0.01	0	0	0	0	0	0	1	0	0	0	0	0	0	0	0	0	0	0	0	0	0	0	1	0	0	0	0	0	0	0	0	0	0	0	0	0	1	0	0	0	0	0
e7881e6bb711855c18e42ba8d3a540e8_rep;size=15;	x__sub0.01	x__sub0.01	x__sub0.01	x__sub0.01	x__sub0.01	x__sub0.01	x__sub0.01	0	0	0	0	0	0	0	0	0	0	0	0	0	0	0	0	0	0	0	0	0	0	0	0	0	0	0	0	0	0	0	0	2	0	0	0	0	0	0	0	0	0
04a22c5468f1739694d2fd79d4cf904f_rep;size=15;	x__sub0.01	x__sub0.01	x__sub0.01	x__sub0.01	x__sub0.01	x__sub0.01	x__sub0.01	0	0	0	0	0	0	0	0	0	0	0	0	0	0	0	0	7	0	0	0	0	0	0	0	0	0	0	0	3	0	0	0	0	0	0	0	0	0	0	0	0	0
579a6aea246e1488abfed1a28a1559a9_rep;size=15;	x__sub0.01	x__sub0.01	x__sub0.01	x__sub0.01	x__sub0.01	x__sub0.01	x__sub0.01	0	0	0	0	0	0	0	0	0	0	0	0	0	0	0	0	0	0	0	0	0	0	0	0	0	0	0	0	0	0	0	0	0	0	0	0	0	0	0	0	0	0
5beae672d21dbc7edb2bafb7e3da64e5_rep;size=15;	x__sub0.01	x__sub0.01	x__sub0.01	x__sub0.01	x__sub0.01	x__sub0.01	x__sub0.01	0	0	0	0	0	0	0	0	0	0	0	0	0	0	0	0	0	0	0	0	0	0	0	0	0	0	0	0	0	0	0	0	0	0	0	0	0	0	0	0	0	0
8d56196a541878fe6e09920051e4167e_rep;size=15;	x__sub0.01	x__sub0.01	x__sub0.01	x__sub0.01	x__sub0.01	x__sub0.01	x__sub0.01	0	0	0	0	0	0	0	0	0	0	0	0	0	0	0	0	0	0	0	0	0	0	0	0	0	0	0	0	0	0	0	0	0	0	0	0	0	0	0	0	0	0
c318e8287cd9ccb1f7cd2abbadcb3ffc_rep;size=15;	x__sub0.01	x__sub0.01	x__sub0.01	x__sub0.01	x__sub0.01	x__sub0.01	x__sub0.01	1	0	0	0	0	0	0	0	0	0	0	0	0	0	0	0	0	0	0	0	0	0	0	0	3	0	0	0	0	0	0	0	0	0	0	0	0	0	0	0	0	0
2de24f40d23665a341705cf4fbb42311_rep;size=15;	x__sub0.01	x__sub0.01	x__sub0.01	x__sub0.01	x__sub0.01	x__sub0.01	x__sub0.01	0	0	0	0	0	0	0	0	0	0	0	0	2	0	0	0	0	0	0	0	0	0	0	0	0	0	0	0	3	0	0	0	0	0	0	0	0	0	0	0	0	0
3688c5be97ba57d0479f9eb16c065ac0_rep;size=15;	x__sub0.01	x__sub0.01	x__sub0.01	x__sub0.01	x__sub0.01	x__sub0.01	x__sub0.01	0	0	0	0	0	0	0	0	0	0	0	0	0	0	0	0	0	0	0	0	0	0	0	0	0	0	0	0	0	0	0	0	0	0	0	0	0	0	0	0	0	0
45771a28d5371f34cb8637927f94a474_rep;size=15;	x__sub0.01	x__sub0.01	x__sub0.01	x__sub0.01	x__sub0.01	x__sub0.01	x__sub0.01	0	0	0	0	0	0	0	0	0	0	0	0	0	0	0	0	1	0	0	0	1	0	0	0	1	0	0	0	0	0	0	0	0	0	0	0	0	0	0	0	0	0
488fab417f83d5657456b76f53cda65a_rep;size=15;	x__sub0.01	x__sub0.01	x__sub0.01	x__sub0.01	x__sub0.01	x__sub0.01	x__sub0.01	0	0	0	0	0	0	0	0	0	0	0	0	1	0	0	0	1	0	0	0	0	0	0	0	0	0	0	0	0	0	0	0	0	0	0	0	0	0	0	0	1	0
530e537ab77d561e2f30b2fecf2abae1_rep;size=15;	x__sub0.01	x__sub0.01	x__sub0.01	x__sub0.01	x__sub0.01	x__sub0.01	x__sub0.01	0	0	0	0	0	0	0	0	0	0	0	0	1	0	0	0	0	0	0	0	0	0	0	0	0	0	0	0	0	0	0	0	0	0	0	0	0	0	0	0	0	0
55574f6f55b92f9ee67f27daaf7c465a_rep;size=15;	x__sub0.01	x__sub0.01	x__sub0.01	x__sub0.01	x__sub0.01	x__sub0.01	x__sub0.01	0	0	0	0	1	0	0	0	0	0	0	0	0	0	0	0	0	0	0	0	0	0	0	0	0	0	0	0	0	0	0	0	0	0	0	0	0	0	0	0	0	0
a4b554ace31ea15ebbfd1a547bdaefb2_rep;size=15;	x__sub0.01	x__sub0.01	x__sub0.01	x__sub0.01	x__sub0.01	x__sub0.01	x__sub0.01	0	0	0	0	0	0	0	0	0	0	0	0	0	0	0	0	0	0	0	0	0	0	0	0	0	0	0	0	0	0	0	0	0	0	0	0	0	0	0	0	0	0
052040208a1b019f59a4b7c55611f2bd_rep;size=15;	x__sub0.01	x__sub0.01	x__sub0.01	x__sub0.01	x__sub0.01	x__sub0.01	x__sub0.01	0	0	0	0	0	0	0	0	0	0	0	0	0	0	0	0	0	0	0	0	0	0	0	0	0	0	0	0	0	0	0	0	0	0	0	0	0	0	0	0	0	0
23230d453fa378cded9451061fee1077_rep;size=15;	x__sub0.01	x__sub0.01	x__sub0.01	x__sub0.01	x__sub0.01	x__sub0.01	x__sub0.01	0	0	0	0	0	0	0	0	0	0	0	0	1	0	0	0	0	0	0	0	0	0	0	0	0	0	0	0	0	0	0	0	0	0	0	0	0	0	0	0	0	0
361bc01c1e30db1ae6a783e15d5a1ac0_rep;size=15;	x__sub0.01	x__sub0.01	x__sub0.01	x__sub0.01	x__sub0.01	x__sub0.01	x__sub0.01	0	0	0	0	0	0	0	0	0	0	0	0	0	0	0	0	1	0	0	0	0	0	0	0	0	0	0	0	0	0	0	0	0	0	0	0	0	0	0	0	0	0
4399dbd4e5ddc2b4f70f812009bdd3c6_rep;size=15;	x__sub0.01	x__sub0.01	x__sub0.01	x__sub0.01	x__sub0.01	x__sub0.01	x__sub0.01	0	0	0	0	0	0	0	0	0	0	0	0	0	0	0	0	0	0	0	0	0	0	0	0	0	0	0	0	0	0	0	0	0	0	0	0	0	0	0	0	0	0
5b7b04057fdd1627378a628ae9e2d8c2_rep;size=15;	x__sub0.01	x__sub0.01	x__sub0.01	x__sub0.01	x__sub0.01	x__sub0.01	x__sub0.01	0	0	0	0	0	0	0	0	0	0	0	0	0	0	0	0	0	0	0	0	0	0	0	0	0	0	0	0	0	0	0	0	0	0	0	0	0	0	0	0	0	0
b71e634a186283cff55abf07a8dcff81_rep;size=15;	x__sub0.01	x__sub0.01	x__sub0.01	x__sub0.01	x__sub0.01	x__sub0.01	x__sub0.01	0	0	0	0	0	0	1	0	0	0	0	0	0	0	0	0	1	0	0	0	0	0	0	0	0	0	0	0	0	0	0	0	0	0	0	0	0	0	0	0	0	0
d65a7d15694d8a37c87acd30c6c851b5_rep;size=15;	x__sub0.01	x__sub0.01	x__sub0.01	x__sub0.01	x__sub0.01	x__sub0.01	x__sub0.01	0	0	0	0	0	0	0	0	0	0	0	0	0	0	0	0	0	0	0	0	0	0	0	0	0	0	0	0	0	0	0	0	0	0	0	0	0	0	0	0	0	0
daaf670170e014c8b34a9724fb8d1aea_rep;size=15;	x__sub0.01	x__sub0.01	x__sub0.01	x__sub0.01	x__sub0.01	x__sub0.01	x__sub0.01	0	0	0	0	0	0	0	0	0	0	0	0	0	0	0	0	0	0	0	0	0	0	0	0	0	0	0	0	0	0	0	0	0	0	0	0	0	0	0	0	0	0
02b40cc832bec8c1f54d634e1cc58333_rep;size=15;	x__sub0.01	x__sub0.01	x__sub0.01	x__sub0.01	x__sub0.01	x__sub0.01	x__sub0.01	0	0	0	0	0	0	0	0	0	0	0	0	0	0	0	0	0	0	0	0	0	0	0	0	0	0	0	0	0	0	0	0	0	0	0	0	0	0	0	0	0	0
045bc2124b30c5995a8d6b3e1ef7877b_rep;size=15;	x__sub0.01	x__sub0.01	x__sub0.01	x__sub0.01	x__sub0.01	x__sub0.01	x__sub0.01	0	0	0	0	0	0	0	0	0	0	0	0	0	0	0	0	0	1	0	0	0	0	0	0	1	0	0	0	0	0	0	0	0	0	0	0	0	0	0	0	0	0
0eb5c37e588b12587e67147733da7154_rep;size=15;	x__sub0.01	x__sub0.01	x__sub0.01	x__sub0.01	x__sub0.01	x__sub0.01	x__sub0.01	0	0	0	0	0	0	0	0	0	0	0	0	0	0	0	0	0	0	0	0	0	0	0	0	0	0	0	0	0	0	0	0	0	0	0	0	0	0	0	0	0	0
1471303783db64d6af59f40263739d21_rep;size=15;	x__sub0.01	x__sub0.01	x__sub0.01	x__sub0.01	x__sub0.01	x__sub0.01	x__sub0.01	0	0	0	0	0	0	0	0	4	0	0	0	0	0	0	0	0	0	0	0	0	0	0	0	0	0	0	0	0	0	0	0	3	0	0	0	0	0	0	0	0	0
3ee8adc0e7a510e773d96579acdf39e7_rep;size=15;	x__sub0.01	x__sub0.01	x__sub0.01	x__sub0.01	x__sub0.01	x__sub0.01	x__sub0.01	0	0	0	0	0	0	0	0	0	0	0	0	0	0	0	0	0	0	0	0	0	0	0	0	0	0	0	0	0	0	0	0	0	0	0	0	1	0	0	0	3	0
598007a6456fb3e78d1f209c51ce192c_rep;size=15;	x__sub0.01	x__sub0.01	x__sub0.01	x__sub0.01	x__sub0.01	x__sub0.01	x__sub0.01	0	0	0	0	0	0	0	0	0	0	0	0	0	0	0	0	0	0	0	0	0	0	0	0	0	0	0	0	0	0	0	0	0	0	0	0	0	0	0	0	0	0
ac325a1bafb87b672762aa2ed5cd970d_rep;size=15;	x__sub0.01	x__sub0.01	x__sub0.01	x__sub0.01	x__sub0.01	x__sub0.01	x__sub0.01	0	0	0	0	0	0	0	0	0	0	0	0	0	0	0	0	0	0	0	0	0	0	0	0	0	0	0	0	0	0	0	0	0	0	0	0	0	0	0	0	0	0
2b7aa5d482093da2772a1353c61ea069_rep;size=15;	x__sub0.01	x__sub0.01	x__sub0.01	x__sub0.01	x__sub0.01	x__sub0.01	x__sub0.01	0	0	0	0	0	0	0	0	0	0	0	0	0	0	0	0	0	0	0	0	0	0	0	0	0	0	0	0	0	0	0	0	0	0	0	0	0	0	0	0	0	0
3f7224fde4aaa2ed0aa983e603861633_rep;size=15;	x__sub0.01	x__sub0.01	x__sub0.01	x__sub0.01	x__sub0.01	x__sub0.01	x__sub0.01	0	0	0	0	2	0	0	0	0	0	0	0	0	0	0	0	0	0	0	0	0	0	0	0	0	0	0	0	0	0	0	0	0	0	0	0	2	0	0	0	2	0
75fc3ff0cec42627bdac43be2077ed94_rep;size=15;	x__sub0.01	x__sub0.01	x__sub0.01	x__sub0.01	x__sub0.01	x__sub0.01	x__sub0.01	0	0	0	0	0	0	0	0	0	0	0	0	0	0	0	0	0	0	0	0	0	0	0	0	0	0	0	0	0	0	0	0	0	0	0	0	0	0	0	0	0	0
d06ec25b8e174f491401e71729f8e221_rep;size=15;	x__sub0.01	x__sub0.01	x__sub0.01	x__sub0.01	x__sub0.01	x__sub0.01	x__sub0.01	0	0	1	0	0	0	0	1	0	0	0	0	0	0	0	0	0	1	0	0	0	0	0	0	0	0	0	0	0	1	0	0	0	0	0	0	0	0	0	0	0	0
da9680ba98313633803252c9ee37182f_rep;size=15;	x__sub0.01	x__sub0.01	x__sub0.01	x__sub0.01	x__sub0.01	x__sub0.01	x__sub0.01	0	0	0	0	0	0	0	0	0	0	0	0	0	0	1	0	0	0	0	0	0	0	0	0	0	0	1	4	0	0	0	0	0	0	0	0	0	0	0	1	0	0
ed33d60d6bd655bf11a6bf6449bd5f77_rep;size=15;	x__sub0.01	x__sub0.01	x__sub0.01	x__sub0.01	x__sub0.01	x__sub0.01	x__sub0.01	1	0	0	0	0	0	0	0	0	0	0	0	0	0	0	0	0	0	0	0	0	0	0	0	0	0	0	0	0	0	0	0	1	0	0	0	0	0	0	0	0	0
28456ca5bd33d5488d1599a911bd9f11_rep;size=15;	x__sub0.01	x__sub0.01	x__sub0.01	x__sub0.01	x__sub0.01	x__sub0.01	x__sub0.01	0	0	0	0	0	0	0	0	0	0	0	0	0	0	0	0	2	0	0	0	1	0	0	0	2	0	0	0	0	0	0	0	0	0	0	0	0	0	0	0	0	0
70b15c232d21cde73e6485260a28c623_rep;size=15;	x__sub0.01	x__sub0.01	x__sub0.01	x__sub0.01	x__sub0.01	x__sub0.01	x__sub0.01	0	0	0	0	0	0	0	0	0	0	0	0	0	0	0	0	0	0	0	0	0	0	0	0	0	0	0	0	0	0	0	0	0	0	0	0	3	0	0	0	0	0
8dc0a0756a673293c6839e5354b2a08a_rep;size=15;	x__sub0.01	x__sub0.01	x__sub0.01	x__sub0.01	x__sub0.01	x__sub0.01	x__sub0.01	0	0	0	0	0	0	0	0	0	0	0	0	0	0	0	0	0	0	0	0	0	0	0	0	0	0	0	0	0	0	0	0	0	0	0	0	0	0	0	0	0	0
ae693bc8bf22f9e78093e8b65f81d917_rep;size=15;	x__sub0.01	x__sub0.01	x__sub0.01	x__sub0.01	x__sub0.01	x__sub0.01	x__sub0.01	0	0	0	0	0	0	0	0	0	0	0	0	1	0	0	0	2	0	0	0	0	0	0	0	0	0	0	0	0	0	0	0	0	0	0	0	0	0	0	0	0	0
ca63eb46fd6defa4dd185045d18368a8_rep;size=15;	x__sub0.01	x__sub0.01	x__sub0.01	x__sub0.01	x__sub0.01	x__sub0.01	x__sub0.01	0	0	0	0	0	0	0	0	0	0	0	0	0	0	0	0	0	0	0	0	0	0	0	0	0	0	0	0	0	0	0	0	0	0	0	0	0	0	0	0	0	0
d881839a8c756ecf4174ee96eb6625f7_rep;size=15;	x__sub0.01	x__sub0.01	x__sub0.01	x__sub0.01	x__sub0.01	x__sub0.01	x__sub0.01	0	0	0	0	0	0	0	0	0	0	0	0	3	0	0	0	0	0	0	0	0	0	0	0	0	0	0	0	0	0	0	0	0	0	0	0	3	0	0	0	0	0
26342bb132a09c9825d6e6cffc724a8b_rep;size=15;	x__sub0.01	x__sub0.01	x__sub0.01	x__sub0.01	x__sub0.01	x__sub0.01	x__sub0.01	0	0	0	0	0	0	0	0	0	0	0	0	0	0	0	0	0	0	0	0	1	0	0	0	0	0	0	0	0	0	0	0	0	0	0	0	4	0	0	0	0	0
2a6627cdd67ed08e4a713cece32fab31_rep;size=15;	x__sub0.01	x__sub0.01	x__sub0.01	x__sub0.01	x__sub0.01	x__sub0.01	x__sub0.01	0	0	0	0	0	0	0	0	0	0	0	0	0	0	0	0	0	0	0	0	0	0	0	0	0	0	0	0	0	0	0	0	0	0	0	0	0	0	0	0	0	0
30faf04873f5956a3b3b0da25dad944c_rep;size=15;	x__sub0.01	x__sub0.01	x__sub0.01	x__sub0.01	x__sub0.01	x__sub0.01	x__sub0.01	0	0	0	0	0	0	0	0	0	0	0	0	0	0	0	0	1	0	0	0	0	0	0	0	0	0	0	0	2	0	0	0	0	0	0	0	0	0	0	0	1	0
44e20a697b3b12d8936d4a4e0e4ed191_rep;size=15;	x__sub0.01	x__sub0.01	x__sub0.01	x__sub0.01	x__sub0.01	x__sub0.01	x__sub0.01	0	0	0	0	0	0	0	0	0	0	0	0	0	0	0	0	0	0	0	0	0	0	0	0	0	0	0	0	0	0	0	0	0	0	0	0	0	0	0	0	1	0
7042f66953426be738c50c18c97f9464_rep;size=15;	x__sub0.01	x__sub0.01	x__sub0.01	x__sub0.01	x__sub0.01	x__sub0.01	x__sub0.01	0	0	0	0	0	0	0	0	0	0	0	0	0	0	0	0	0	0	0	0	0	0	0	0	0	0	0	0	0	0	0	0	0	0	0	0	0	0	0	0	0	0
8246e3f4c565b8349875bc404d953b87_rep;size=15;	x__sub0.01	x__sub0.01	x__sub0.01	x__sub0.01	x__sub0.01	x__sub0.01	x__sub0.01	0	4	1	0	0	0	1	0	0	0	0	0	0	0	0	0	0	0	0	0	0	1	0	0	0	0	0	1	0	0	0	0	0	0	0	0	0	0	0	0	0	0
833064f7e8c87bdb4e799ab63a27a89a_rep;size=15;	x__sub0.01	x__sub0.01	x__sub0.01	x__sub0.01	x__sub0.01	x__sub0.01	x__sub0.01	0	0	0	0	0	0	0	0	0	0	0	0	0	0	0	0	0	0	0	0	0	0	0	0	0	0	0	0	0	0	0	0	0	0	0	0	0	0	0	0	0	0
a849ffb7e5e530c025ec970d31d3a599_rep;size=15;	x__sub0.01	x__sub0.01	x__sub0.01	x__sub0.01	x__sub0.01	x__sub0.01	x__sub0.01	0	1	1	0	0	2	0	0	0	0	1	0	0	0	0	0	0	1	0	1	0	0	1	0	0	1	0	0	0	0	0	0	0	2	0	0	0	0	0	0	0	0
b4f787e14a311d60acc047493e1cdcfd_rep;size=15;	x__sub0.01	x__sub0.01	x__sub0.01	x__sub0.01	x__sub0.01	x__sub0.01	x__sub0.01	0	0	0	0	0	0	0	0	0	0	0	0	0	0	0	0	0	0	0	0	0	0	0	0	0	0	0	0	0	0	0	0	0	0	0	0	0	0	0	0	0	0
f278783179b4e850a95d4278cd187bfd_rep;size=15;	x__sub0.01	x__sub0.01	x__sub0.01	x__sub0.01	x__sub0.01	x__sub0.01	x__sub0.01	0	0	0	0	0	1	0	0	0	0	0	0	0	0	1	0	0	0	1	1	0	0	0	0	0	0	1	0	2	0	0	0	0	0	0	0	0	1	0	0	1	0
8e28edb2e310ef676f8b80fa5853c9c5_rep;size=15;	x__sub0.01	x__sub0.01	x__sub0.01	x__sub0.01	x__sub0.01	x__sub0.01	x__sub0.01	0	0	0	0	0	0	0	0	0	0	0	0	0	0	0	0	0	0	0	0	0	0	0	0	0	0	0	0	0	0	0	0	0	0	0	0	0	0	0	0	0	0
f1a2fe7d2bd0f500ed73f627ca51cd6e_rep;size=15;	x__sub0.01	x__sub0.01	x__sub0.01	x__sub0.01	x__sub0.01	x__sub0.01	x__sub0.01	0	0	0	0	0	0	0	0	0	0	0	0	0	0	0	0	0	0	0	0	0	0	0	0	0	0	0	0	0	0	0	0	0	0	0	0	0	0	0	0	0	0
3d6fe497ad78a2b318f8f5222df69f20_rep;size=15;	x__sub0.01	x__sub0.01	x__sub0.01	x__sub0.01	x__sub0.01	x__sub0.01	x__sub0.01	0	0	0	0	0	0	0	0	0	0	0	0	0	0	0	0	0	0	0	0	0	0	0	0	0	0	0	0	0	0	0	0	0	0	0	0	0	0	0	0	0	0
cd25ab4e7af7fce461e5adae539f8e7d_rep;size=15;	x__sub0.01	x__sub0.01	x__sub0.01	x__sub0.01	x__sub0.01	x__sub0.01	x__sub0.01	0	0	0	0	0	0	0	0	0	0	0	0	0	0	0	0	0	0	0	0	0	0	0	0	0	0	0	0	0	0	0	0	0	0	0	0	0	0	0	0	0	0
2eae0b0b75bb7cefbafffae7bcf5717a_rep;size=15;	x__sub0.01	x__sub0.01	x__sub0.01	x__sub0.01	x__sub0.01	x__sub0.01	x__sub0.01	0	0	0	0	0	0	0	0	0	0	0	0	0	0	0	0	0	0	0	0	0	0	0	0	0	0	0	0	0	0	0	0	0	0	0	0	0	0	0	0	0	0
6171a8a80b5a22c9535ddb586521e372_rep;size=15;	x__sub0.01	x__sub0.01	x__sub0.01	x__sub0.01	x__sub0.01	x__sub0.01	x__sub0.01	0	0	0	0	0	0	0	0	0	0	0	0	0	0	0	0	0	0	0	0	0	0	0	0	0	0	0	0	0	0	0	0	0	0	0	0	0	0	0	0	0	0
23c7d03a382dfae9e5e0e7eace771cf6_rep;size=14;	x__sub0.01	x__sub0.01	x__sub0.01	x__sub0.01	x__sub0.01	x__sub0.01	x__sub0.01	0	0	0	0	0	0	0	0	0	0	0	0	0	0	0	0	0	0	0	0	0	0	0	0	0	0	0	0	0	0	0	0	0	0	0	0	0	0	0	0	0	0
ac8b65ad9e653ff127556060cbee32c4_rep;size=14;	x__sub0.01	x__sub0.01	x__sub0.01	x__sub0.01	x__sub0.01	x__sub0.01	x__sub0.01	0	0	0	0	0	0	0	0	0	0	0	0	0	0	0	0	0	0	0	0	0	0	0	0	0	0	0	0	0	0	0	0	0	0	0	0	0	0	0	0	0	0
e6e4d91628e13aeb66018c4a8758c441_rep;size=14;	x__sub0.01	x__sub0.01	x__sub0.01	x__sub0.01	x__sub0.01	x__sub0.01	x__sub0.01	0	0	0	0	0	0	0	0	0	0	0	0	0	0	0	0	0	0	0	0	0	0	0	0	0	0	0	0	0	0	0	0	0	0	0	0	0	0	0	0	0	0
f5e3117f25c81744c3542205ffcbdfee_rep;size=14;	x__sub0.01	x__sub0.01	x__sub0.01	x__sub0.01	x__sub0.01	x__sub0.01	x__sub0.01	0	1	0	0	0	0	0	0	3	0	0	0	0	0	0	0	1	0	0	0	0	0	0	0	0	0	0	0	0	0	0	0	0	0	0	0	0	0	0	0	0	0
0afa691c2643adc103bd677ad6921b90_rep;size=14;	x__sub0.01	x__sub0.01	x__sub0.01	x__sub0.01	x__sub0.01	x__sub0.01	x__sub0.01	0	0	0	0	0	0	0	0	0	0	0	0	0	0	0	0	0	0	0	0	0	0	0	0	0	0	0	0	0	0	0	0	0	0	0	0	0	0	0	0	0	0
1214f696522f8effbd9c3948e50d078b_rep;size=14;	x__sub0.01	x__sub0.01	x__sub0.01	x__sub0.01	x__sub0.01	x__sub0.01	x__sub0.01	0	0	0	0	0	0	0	0	0	0	0	0	0	0	0	0	0	0	0	0	0	0	0	0	0	0	0	0	1	0	0	0	0	0	0	0	0	0	0	0	0	0
5913bd73fbba6c7bf7d72aac97d0f891_rep;size=14;	x__sub0.01	x__sub0.01	x__sub0.01	x__sub0.01	x__sub0.01	x__sub0.01	x__sub0.01	0	0	0	0	0	0	0	0	0	0	0	0	0	0	0	0	3	0	0	0	0	0	0	0	0	0	0	0	0	0	0	0	0	0	0	0	0	0	0	0	0	0
e14de64ec7ef32e1c995efa3d399f76b_rep;size=14;	x__sub0.01	x__sub0.01	x__sub0.01	x__sub0.01	x__sub0.01	x__sub0.01	x__sub0.01	0	0	0	0	0	0	0	0	0	0	0	0	0	0	0	0	0	0	0	0	0	0	0	0	0	0	0	0	0	0	0	0	0	0	0	0	0	0	0	0	0	0
276f75d65d002f4f41d25c424d272527_rep;size=14;	x__sub0.01	x__sub0.01	x__sub0.01	x__sub0.01	x__sub0.01	x__sub0.01	x__sub0.01	0	0	0	0	0	0	0	0	0	0	0	0	2	0	0	0	0	0	0	0	0	0	0	0	0	0	0	0	0	0	0	0	0	0	0	0	3	0	0	0	1	0
c70ec01bdecd8c087d64e52446b01b58_rep;size=14;	x__sub0.01	x__sub0.01	x__sub0.01	x__sub0.01	x__sub0.01	x__sub0.01	x__sub0.01	0	0	0	0	1	0	0	0	0	0	0	0	0	0	0	0	0	0	0	0	4	0	0	0	0	0	0	0	0	0	0	0	0	0	0	0	0	0	0	0	0	0
241029603fd05984b474856da13e6fe2_rep;size=14;	x__sub0.01	x__sub0.01	x__sub0.01	x__sub0.01	x__sub0.01	x__sub0.01	x__sub0.01	0	0	0	0	1	0	0	0	0	0	0	0	0	0	0	0	2	0	0	0	0	0	0	0	1	0	0	0	0	0	0	0	0	0	0	0	5	0	0	0	0	0
2fbe6e2b9fbba1d464e7ce192fbeae8a_rep;size=14;	x__sub0.01	x__sub0.01	x__sub0.01	x__sub0.01	x__sub0.01	x__sub0.01	x__sub0.01	0	0	0	0	0	0	0	0	0	0	0	0	0	0	0	0	0	0	0	0	0	0	0	0	0	0	0	0	0	0	0	0	0	0	0	0	0	0	0	0	0	0
8e41d793ead9429cc50f710e0eab2c88_rep;size=14;	x__sub0.01	x__sub0.01	x__sub0.01	x__sub0.01	x__sub0.01	x__sub0.01	x__sub0.01	0	0	0	0	0	0	0	0	0	0	0	0	0	0	0	0	0	0	0	0	0	0	0	0	0	0	0	0	0	0	0	0	0	0	0	0	0	0	0	0	0	0
9532c118f3db0df06e434505199a1640_rep;size=14;	x__sub0.01	x__sub0.01	x__sub0.01	x__sub0.01	x__sub0.01	x__sub0.01	x__sub0.01	0	0	0	0	0	0	0	0	0	0	0	0	0	0	0	0	0	0	0	0	0	0	0	0	0	0	0	0	0	0	0	0	0	0	0	0	0	0	0	0	0	0
a24bf40ab8112fd478835d6cf1fd94a7_rep;size=14;	x__sub0.01	x__sub0.01	x__sub0.01	x__sub0.01	x__sub0.01	x__sub0.01	x__sub0.01	0	0	0	0	0	0	0	0	0	0	0	0	0	0	0	0	0	0	0	0	0	0	0	0	0	0	0	0	0	0	0	0	0	0	0	0	0	0	0	0	0	0
a422a8a4e87dd8f56d89fe0ba4492ac3_rep;size=14;	x__sub0.01	x__sub0.01	x__sub0.01	x__sub0.01	x__sub0.01	x__sub0.01	x__sub0.01	0	0	0	0	0	0	0	0	0	0	0	0	0	0	0	0	14	0	0	0	0	0	0	0	0	0	0	0	0	0	0	0	0	0	0	0	0	0	0	0	0	0
e223b6bcb81bf0fe1a9d81a0efbe8d24_rep;size=14;	x__sub0.01	x__sub0.01	x__sub0.01	x__sub0.01	x__sub0.01	x__sub0.01	x__sub0.01	0	0	0	0	0	0	0	0	1	0	0	0	2	0	0	0	0	0	0	0	0	0	0	0	0	0	0	0	0	0	0	0	0	0	0	0	1	0	0	0	0	0
05030f2f8f7c065abe75580126872c2e_rep;size=14;	x__sub0.01	x__sub0.01	x__sub0.01	x__sub0.01	x__sub0.01	x__sub0.01	x__sub0.01	0	0	0	0	0	0	0	0	0	0	0	0	0	0	0	0	0	0	0	0	0	0	0	0	0	0	0	0	0	0	0	0	0	0	0	0	0	0	0	0	0	0
267cd78557a8615f12660829c5335f1a_rep;size=14;	x__sub0.01	x__sub0.01	x__sub0.01	x__sub0.01	x__sub0.01	x__sub0.01	x__sub0.01	0	0	0	0	0	0	0	0	0	0	0	0	0	0	0	0	0	0	0	0	0	0	0	0	0	0	0	0	0	0	0	0	0	0	0	0	0	0	0	0	0	0
3da6c5159b6eaceb74a46d3568a26904_rep;size=14;	x__sub0.01	x__sub0.01	x__sub0.01	x__sub0.01	x__sub0.01	x__sub0.01	x__sub0.01	0	0	0	0	0	0	0	0	0	0	0	0	0	0	0	0	0	0	0	0	0	0	0	0	0	0	0	0	0	0	0	0	0	0	0	0	0	0	0	0	0	0
68e598393b742a69f448a83b4a96f572_rep;size=14;	x__sub0.01	x__sub0.01	x__sub0.01	x__sub0.01	x__sub0.01	x__sub0.01	x__sub0.01	0	0	0	0	0	0	0	0	0	0	0	0	1	0	0	0	0	0	0	0	1	0	0	0	0	0	0	0	0	0	0	0	0	0	0	0	0	0	0	0	1	0
9422018d3f3f9dee8d4d348459ad2882_rep;size=14;	x__sub0.01	x__sub0.01	x__sub0.01	x__sub0.01	x__sub0.01	x__sub0.01	x__sub0.01	1	0	0	0	1	0	0	0	0	0	0	0	0	0	0	0	0	0	0	0	0	0	0	0	0	0	0	0	0	0	0	0	0	0	0	0	0	0	0	0	0	0
9c6e901256cb9dd9b52d81722d554cbf_rep;size=14;	x__sub0.01	x__sub0.01	x__sub0.01	x__sub0.01	x__sub0.01	x__sub0.01	x__sub0.01	0	0	0	0	0	0	0	0	0	0	0	1	0	0	0	0	0	0	0	0	0	0	0	0	0	0	0	1	0	0	0	0	0	0	0	0	0	0	0	0	0	0
ae32e775c5b537ce8c10f2307a975f07_rep;size=14;	x__sub0.01	x__sub0.01	x__sub0.01	x__sub0.01	x__sub0.01	x__sub0.01	x__sub0.01	0	0	0	0	0	0	0	0	0	0	0	0	0	0	0	0	0	0	0	0	0	0	0	0	0	0	0	0	0	0	0	0	1	0	0	0	0	0	0	0	0	0
e399bbfb407a51f771db341e030d4c6f_rep;size=14;	x__sub0.01	x__sub0.01	x__sub0.01	x__sub0.01	x__sub0.01	x__sub0.01	x__sub0.01	0	0	0	0	0	0	0	0	0	0	0	0	0	0	0	0	0	0	0	0	0	0	0	0	0	0	0	0	0	0	0	0	0	0	0	0	0	0	0	0	0	0
f0f3296c2e89f8d2fdc8513912a65a27_rep;size=14;	x__sub0.01	x__sub0.01	x__sub0.01	x__sub0.01	x__sub0.01	x__sub0.01	x__sub0.01	0	1	0	0	0	0	0	0	0	0	0	0	0	0	0	0	0	0	0	0	0	0	0	0	0	0	0	0	0	0	0	1	0	0	1	0	0	0	0	0	0	1
fb2b8fe1e0c50d16753cd4671c4e8759_rep;size=14;	x__sub0.01	x__sub0.01	x__sub0.01	x__sub0.01	x__sub0.01	x__sub0.01	x__sub0.01	4	0	0	0	0	0	0	0	1	0	0	0	1	0	0	0	0	0	0	0	0	0	0	0	1	0	0	0	0	0	0	0	0	0	0	0	0	0	0	0	0	0
004492e5832a710e2a7245f108335ec2_rep;size=14;	x__sub0.01	x__sub0.01	x__sub0.01	x__sub0.01	x__sub0.01	x__sub0.01	x__sub0.01	0	0	0	0	0	0	0	0	0	0	0	0	0	0	0	0	0	0	0	0	0	0	0	0	0	0	0	0	0	0	0	0	0	0	0	0	0	0	0	0	0	0
1a166e6b182443c612e233c6aa1fd33f_rep;size=14;	x__sub0.01	x__sub0.01	x__sub0.01	x__sub0.01	x__sub0.01	x__sub0.01	x__sub0.01	0	0	0	0	0	0	0	0	0	0	0	0	0	0	0	0	0	0	0	0	0	0	0	0	0	0	0	0	0	0	0	0	0	0	0	0	0	0	0	0	0	0
434571ddff93ac605f674a734d0a1a2e_rep;size=14;	x__sub0.01	x__sub0.01	x__sub0.01	x__sub0.01	x__sub0.01	x__sub0.01	x__sub0.01	0	0	0	0	0	0	0	0	0	0	0	0	0	0	0	0	0	0	0	0	0	0	0	0	0	0	0	0	0	0	0	0	0	0	0	0	0	0	0	0	0	0
5d2a3f0d7a691c833c11d4305e612643_rep;size=14;	x__sub0.01	x__sub0.01	x__sub0.01	x__sub0.01	x__sub0.01	x__sub0.01	x__sub0.01	0	0	0	0	0	0	0	0	0	0	0	0	0	0	0	0	0	0	0	0	0	0	0	0	0	0	0	0	1	0	0	0	0	0	0	0	0	0	0	0	0	0
5efd03e5b37ebfe2aa6f84d536cee100_rep;size=14;	x__sub0.01	x__sub0.01	x__sub0.01	x__sub0.01	x__sub0.01	x__sub0.01	x__sub0.01	1	0	0	0	7	0	0	0	0	0	0	0	0	0	0	0	0	0	0	0	0	0	0	0	1	0	0	0	0	0	0	0	0	0	0	0	2	0	0	0	0	0
6c2b9ac6771617b686142f4de5ec7451_rep;size=14;	x__sub0.01	x__sub0.01	x__sub0.01	x__sub0.01	x__sub0.01	x__sub0.01	x__sub0.01	0	0	0	0	0	0	0	0	0	0	0	0	0	0	0	0	0	0	0	0	0	0	0	0	0	0	0	0	0	0	0	0	0	0	0	0	0	0	0	0	0	0
8147c3b0f0accc0cc395a9186cc2dd0b_rep;size=14;	x__sub0.01	x__sub0.01	x__sub0.01	x__sub0.01	x__sub0.01	x__sub0.01	x__sub0.01	0	0	0	0	0	0	0	0	0	0	0	0	0	0	0	0	0	0	0	0	0	0	0	0	0	1	0	0	0	0	0	0	0	0	0	1	0	0	0	0	0	0
[truncated: 421 more rows]
[truncated: 6 more columns]

## Sheet: Table S4
Table S4. Abundance for fungal OTUs in 2020 wines
[truncated: 1,138 more rows]
[truncated: 6 more columns]

## Sheet: Table S5
Table S5. Distance-based Redundancy Analysis (DBRDA) of Bray distances for yeast communities (999 permutations).
[truncated: 13 more rows]

[truncated: 2 more sheets: Table S6, Table S7]
